# Supplementary material for: Comparative Phosphoproteomic Analysis of Barley Embryos with Different Dormancy during Imbibition
Source: MDPI journal article supplement (doi:10.3390/ijms20020451), 2019-01-21
Supplement: s1 [file s1]

## Supplementary materials

### **Table S1. List of phosphopeptides in barley grains.**

Freshly harvested or after-ripened barley grains were exposed to water for 0, 1, 3, and 10 h and enriched phosphopeptides were analyzed with a liquid chromatography–tandem mass spectrometry (LC-MS/MS) system. Tables consist of relative peak area of each phosphopeptides with annotated information (sequence, modification, or protein description, etc.), for three replicates.

### **Table S2. List of responded phosphopeptides during imbibition.**

Quantitative data of phosphopeptides were derived from FH and AR grains treated with imbibition. This list shows phosphopeptides which were upregulated or downregulated in FH or AR grains with p-value less than 0.05 for at least one of the time points analyzed.

### **Table S3. List of GO terms for phosphopeptides in barley grains.**

The GO terms were enriched phosphopeptides, which were upregulated or downregulated in FH or AR grains, using DAVID program.

### **Table S4. Classification of phosphopeptides by motif groups.**

Phosphorylation motifs were analyzed for phosphopeptides in barley grains using Motif-x program. Each motif group was defined as follows: Group 1, [-R/K-x-x-pS/pT-] and Group 2, [-pS/pT-P-].
