# Supplementary material for: Comparative Phosphoproteomic Analysis of Barley Embryos with Different Dormancy during Imbibition
Source: Int J Mol Sci. 2019 Jan 21;20(2):451. doi: 10.3390/ijms20020451 (PMC6359383; doi:10.3390/ijms20020451)
Supplement: Supplementary file 1 [file ijms-20-00451-s001.zip]

Archive with 6 entries (5 files):
- ijms-418799 sp for proof 1.18/
- ijms-418799 sp for proof 1.18/New Microsoft Word Document.pdf
- ijms-418799 sp for proof 1.18/Table S1.xlsx
- ijms-418799 sp for proof 1.18/Table S2.xlsx
- ijms-418799 sp for proof 1.18/Table S3.xlsx
- ijms-418799 sp for proof 1.18/Table S4.xlsx
