# Supplementary material for: Comparative Phosphoproteomic Analysis of Barley Embryos with Different Dormancy during Imbibition
Source: Int J Mol Sci. 2019 Jan 21;20(2):451. doi: 10.3390/ijms20020451 (PMC6359383; doi:10.3390/ijms20020451)
Supplement: Supplementary file 1 [file ijms-20-00451-s001.zip › ijms-418799 sp for proof 1.18/Table S1.xlsx]

## Sheet: Table S1
Freshly harvested or after-ripened barley grains were exposed to water for 0, 1, 3, and 10 h and enriched phosphopeptides were analyzed with a liquid chromatography–tandem mass spectrometry (LC-MS/MS) system. Tables consist of relative peak area of each phosphopeptides with annotated information (sequence, modification, or protein description, etc.), for three replicates.
precursor	charge	Mz	miss cleaves	protein	pep seq	seq mod	retantion time	ortholog	description	pep_score	pep_var_mod_conf	p value	q value	rep. #1								rep. #2								rep. #3								p value
														FH				AR				FH				AR				FH				AR
														0h	1h	3h	10h	0h	1h	3h	10h	0h	1h	3h	10h	0h	1h	3h	10h	0h	1h	3h	10h	0h	1h	3h	10h	FH			AR
														No .1	No .4	No .7	No .10	No .13	No .16	No .19	No .22	No .2	No .5	No .8	No .11	No .14	No .17	No .20	No .23	No .3	No .6	No .9	No .12	No .15	No .18	No .21	No .24	1h	3h	10h	1h	3h	10h
930.6945++++	4	930.695	1	AK248344.1	GGGRSPDNQVLAAGPTPAGAYPSGAVQPSGGYAAAVGGTR	GGGRS[+80]PDNQVLAAGPTPAGAYPSGAVQPSGGYAAAVGGTR	117.37	AT2G42520.1	| P-loop containing nucleoside triphosphate hydrolases superfamily protein | chr2:17705382-17708744 FORWARD LENGTH=6	211.66	1	6.82339e-22	9.08193e-19	966912	604140	654712	476675	735121	860654	542802	1.01738e+06	216402	84765.9	320882	218642	148411	542099	614702	621600	130722	57362.8	189595	156789	57391.3	135805	682475	916278	0.595471	0.878966	0.641032	0.552273	0.299959	0.113921
1092.1668+++	3	1092.17	0	MLOC_60214.3	SDAAAVDSQPGAAPNESPSAVNNGQLSPGASTVK	SDAAAVDSQPGAAPNESPSAVNNGQLS[+80]PGASTVK	119.73	-	-	208.37	1	1.45546e-21	9.68608e-19	285492	355751	301984	290989	364276	358889	224231	360216	142343	115856	172119	162855	109498	240356	316679	95219.1	40288.7	33908.6	95451.5	50086.1	17824.7	80607.9	365591	132453	0.923783	0.740889	0.912101	0.665388	0.341018	0.824432
883.0740+++	3	883.074	0	AK252415.1	AFLSVGNLAELYDSVDGSGFGPHSK	AFLS[+80]VGNLAELYDSVDGSGFGPHSK	100.87	AT5G54440.1	CLUB, AtTRS130 | CLUB | chr5:22100056-22107695 FORWARD LENGTH=1259	193.27	1	4.70977e-20	1.56718e-17	140004	151714	147252	21850.3	35183.4	149302	64453.6	21843	114909	34736.6	138321	17065.5	59972.7	94664.8	141396	51675	87549	25515.8	89119.1	23847.1	24772.3	33012.1	119051	19251.6	0.421328	0.679637	0.0258245	0.27509	0.112798	0.582495
970.1301+++	3	970.13	0	MLOC_79165.2	VTIGEAMEAAALSAGDRPLEETDAAAIR	VTIGEAMEAAALS[+80]AGDRPLEETDAAAIR	119.62	AT3G22490.1	| Seed maturation protein | chr3:7969785-7970738 REVERSE LENGTH=262	189.22	1	1.19674e-19	2.81093e-17	349718	301371	694967	15155.6	442197	587867	443742	268536	143059	72459	295650	64654.7	137832	409921	813767	200579	75524.2	26353.4	87273.5	114488	49109.6	94335	638702	180581	0.66847	0.478352	0.289549	0.469847	0.077636	0.960303
1013.1189+++	3	1013.12	0	AK367340	NDVGLSPPNYSAGVQSEALDDLSQSHEK	NDVGLS[+80]PPNYSAGVQSEALDDLSQSHEK	119.77	AT2G02570.4	| nucleic acid binding;RNA binding | chr2:698361-700794 REVERSE LENGTH=300	183.05	1	4.9545e-19	9.42063e-17	392092	301601	381714	416257	28635.8	320001	261512	458026	251183	107024	244067	228723	174500	181294	319403	309533	141250	37752.4	212042	129925	28724.8	64382.2	411522	575833	0.370551	0.855063	0.978769	0.297326	0.0303313	0.0268095
886.6938++++	4	886.694	0	AK374192	APTPRPPPPASLQPDSPGVFFTNAAAAAPLGSAHR	APTPRPPPPASLQPDS[+80]PGVFFTNAAAAAPLGSAHR	119.64	AT1G11360.4	| Adenine nucleotide alpha hydrolases-like superfamily protein | chr1:3822171-3822899 REVERSE LENGTH=242	182.76	1	5.29663e-19	9.61339e-17	588183	948298	593795	1.43829e+06	2.11042e+06	1.17213e+06	64439.1	1.33863e+06	163301	365504	1.44562e+06	921839	216897	1.32241e+06	633073	664451	97008.7	54768.4	172077	238569	96050.4	21835.3	404435	1.28706e+06	0.608134	0.37848	0.264483	0.970446	0.579921	0.715065
1152.8101+++	3	1152.81	0	MLOC_67342.2	APDLSSVISNPEASTAAQEDDEDCDETGVEPK	APDLSSVIS[+80]NPEASTAAQEDDEDC[+57]DETGVEPK	119.16	AT3G12390.1	| Nascent polypeptide-associated complex (NAC), alpha subunit family protein | chr3:3942344-3943595 FORWARD LENGTH=2	178.67	1	1.35831e-18	2.1695e-16	9319.09	6201.32	77107.4	144983	6569.34	17634.4	40403.8	119982	31383.6	19901.9	27137.6	69907.4	26728.3	8733.47	40253	11144.3	36641.8	23275.1	31951.9	19630.8	151995	6711.95	54874.2	74341	0.414379	0.355072	0.295977	0.38177	0.751644	0.911
648.6540+++	3	648.654	0	MLOC_59292.1	SATENIFGSAQGLTQVLK	SATENIFGS[+80]AQGLTQVLK	119.91	AT2G36640.1	ATECP63, ECP63 | embryonic cell protein 63 | chr2:15357019-15358552 REVERSE LENGTH=448	175.23	1	2.99916e-18	4.12954e-16	575299	939226	873110	109106	556974	1.0552e+06	1.02343e+06	135252	181240	104558	968276	98342.6	191046	773913	1.31812e+06	69452.7	93299.4	177984	309967	51520.4	265489	177849	976847	279869	0.711843	0.185278	0.317764	0.360791	0.0156354	0.261518
917.0987+++	3	917.099	0	AK362023	IEEPVISESANEQSPEAIGLTEAQK	IEEPVISESANEQS[+80]PEAIGLTEAQK	118.65	AT4G04950.1	| thioredoxin family protein | chr4:2517882-2519924 REVERSE LENGTH=488	171.3	1	7.4131e-18	8.96985e-16	311191	197458	156898	213532	176997	168087	106639	254371	121901	60588	138506	178134	87613.7	126252	121488	70541.3	116702	38883.3	90358.6	96179.5	40777.9	49735	145670	159920	0.374442	0.500112	0.795156	0.823093	0.638176	0.434283
817.3807+++	3	817.381	0	MLOC_44066.1	AVNYPDVSPVFYSLQQENATK	AVNYPDVSPVFYS[+80]LQQENATK	119.88	AT3G46920.1	| Protein kinase superfamily protein with octicosapeptide/Phox/Bem1p domain | chr3:17280430-17284857 REVERSE LENGTH=	170.23	1	9.48418e-18	1.05195e-15	138601	86130.1	90912.3	46129.7	143984	137451	71420.3	36042.9	47771.9	43765.7	60321.5	294929	50515.5	110953	89936.4	28776.6	39113.1	63268.2	66514.2	91390.9	56184.1	16346.1	19877.8	20545.5	0.781911	0.945079	0.492691	0.927759	0.574009	0.213378
1198.0843++	2	1198.08	0	AK364646	AGSTGGLGGLGSADLSSLLGGLGGNAR	AGSTGGLGGLGS[+80]ADLSSLLGGLGGNAR	119.01	AT2G17200.1	DSK2 | ubiquitin family protein | chr2:7482133-7485090 REVERSE LENGTH=551	168.37	1	1.45546e-17	1.49017e-15	66098.9	109530	226753	52319	3647.82	52173.1	166384	37396	37521.9	20916.3	173963	1906.95	122934	347299	103527	29260.1	49988.8	55124.4	81674.2	37891.2	61897.4	19377.5	189172	13214.5	0.732127	0.126523	0.317187	0.556754	0.126351	0.411436
971.9049++	2	971.905	0	MLOC_13554.5	AILEGGSDDEGASTEAQGR	AILEGGS[+80]DDEGASTEAQGR	118.98	AT1G64790.1	ILA | ILITYHIA | chr1:24065232-24081908 REVERSE LENGTH=2610	159.08	1	1.23595e-16	9.13914e-15	27641.8	22888.3	65093.1	206947	32397.9	8238.07	42038.6	238662	57125.4	54973.2	48966.1	71363.4	64069.1	44331	29843.8	190243	148411	119226	129995	508352	106251	51730.1	41171	23318.5	0.810944	0.939503	0.302852	0.284853	0.303105	0.349395
976.4648+++	3	976.465	1	AK369948	DRSPPPPPPPPSSSSASPLAVVCSFWK	DRS[+80]PPPPPPPPSSSSASPLAVVC[+57]SFWK	99.56	AT3G18480.1	AtCASP, CASP | CCAAT-displacement protein alternatively spliced product | chr3:6336924-6341596 FORWARD LENGTH=689	156.1	1	2.45471e-16	1.6613e-14	17507.8	10932.1	7664.23	11990.7	14055.4	4754.87	46412.5	5704.16	7836.91	5121.54	16428.3	3831.12	25661	15800.6	17906	10498	22496.7	53765.5	19307.2	12222.2	11437	11708.3	45542.9	27649.4	0.690761	0.806854	0.287209	0.330217	0.198683	0.77996
816.8931++++	4	816.893	0	MLOC_4418.3	AMSPQVRPPAGPPDVGSHYLSELLQEHQK	AM[+16]S[+80]PQVRPPAGPPDVGSHYLSELLQEHQK	119.55	AT2G38610.2	| RNA-binding KH domain-containing protein | chr2:16147552-16149638 REVERSE LENGTH=286	155.64	1	2.72898e-16	1.81613e-14	94895.9	304257	168710	195788	254085	215398	45840.4	271396	342406	92415.2	200578	255160	494336	248834	79113.5	54558.8	131355	937827	123783	282922	145955	23284.4	38681.5	301477	0.437649	0.783401	0.568085	0.356191	0.143298	0.539986
722.9802+++	3	722.98	1	MLOC_5540.1	VDSKGEVCGTTYTVDEQAK	VDS[+80]KGEVC[+57]GTTYTVDEQAK	119.05	AT3G22850.1	| Aluminium induced protein with YGL and LRDR motifs | chr3:8089067-8090275 FORWARD LENGTH=248	153.79	1	4.1783e-16	2.49014e-14	906207	1.37877e+06	2.16265e+06	1.65458e+06	2.61638e+06	2.52375e+06	2.0237e+06	988119	1.39808e+06	975479	1.19626e+06	1.49086e+06	1.36592e+06	2.74469e+06	2.38391e+06	329100	505117	548461	1.10414e+06	1.15097e+06	302500	814588	2.32189e+06	1.45093e+06	0.935223	0.286089	0.194598	0.555114	0.35233	0.566774
958.8130+++	3	958.813	0	AK367694	VGGNATHLITPSEIISGALSAESNQISK	VGGNATHLITPSEIISGALS[+80]AESNQISK	96.19	AT3G13300.1	VCS | Transducin/WD40 repeat-like superfamily protein | chr3:4304085-4309949 FORWARD LENGTH=1344	151.94	1	6.39735e-16	3.59783e-14	187619	204326	229619	17465.3	210747	227804	174872	17768.1	138786	67833.6	178309	12218.3	104833	176475	208447	18717.7	48524.8	69176	86004.7	40835.1	31863.5	41862.1	163112	7908.16	0.865854	0.546511	0.135313	0.694202	0.342016	0.191783
1067.4886++	2	1067.49	0	AK372980	LQEGATSESSAGSPLYTSLR	LQEGATSESSAGS[+80]PLYTSLR	119.76	AT1G17820.1	| Putative integral membrane protein conserved region (DUF2404) | chr1:6131751-6135115 REVERSE LENGTH=803	151.36	1	7.31139e-16	3.99923e-14	66353.7	46533.8	71904.4	51677.2	23625.1	36286.5	68455.1	39943.7	58475.7	31405.9	40344	26703.6	53353.5	43012.1	71964.2	24179.7	65997.1	102119	51879.4	58112.7	45766.9	23725.1	79970.3	34215.4	0.883572	0.450613	0.209358	0.577645	0.0763175	0.502762
748.9742+++	3	748.974	0	MLOC_36424.1	LWQYGDVESDEEEQAPGGR	LWQYGDVES[+80]DEEEQAPGGR	119.43	AT5G07350.1	Tudor1, AtTudor1, TSN1 | TUDOR-SN protein 1 | chr5:2320344-2324892 REVERSE LENGTH=991	150.9	1	8.12831e-16	4.32751e-14	58305.2	127585	1.55872e+06	1.29829e+06	52851.2	509796	677551	1.91214e+06	206480	110824	510812	1.22939e+06	82574.3	119953	2.04299e+06	1.28393e+06	173696	295900	213522	180914	215148	39528.9	1.04987e+06	2.07016e+06	0.696045	0.272845	0.173402	0.56055	0.108928	0.021675
952.1222+++	3	952.122	0	MLOC_10078.2	LTVGDIASHVQHEIQYGGDNPLASPR	LTVGDIASHVQHEIQYGGDNPLAS[+80]PR	119.63	AT4G09830.1	| Uncharacterised conserved protein UCP009193 | chr4:6188866-6190591 FORWARD LENGTH=191	147.03	1	1.98153e-15	8.69477e-14	123409	147398	139869	98712	111834	147208	112439	280465	73316	23642.2	118719	37000.8	120129	187549	275783	150982	32018.9	21353.1	49912.7	29787.2	16294.9	29264.3	168324	266416	0.821764	0.533422	0.58229	0.553487	0.176547	0.0658627
1059.9068++	2	1059.91	0	AK376423	SAEEDASEEEYGYGFVEK	SAEEDAS[+80]EEEYGYGFVEK	116.79	AT1G07210.1	| Ribosomal protein S18 | chr1:2215320-2216668 FORWARD LENGTH=261	145.21	1	3.01301e-15	1.20309e-13	172793	161806	112625	116138	237976	78954.6	151133	238203	137299	34087.8	66036.7	83251.3	50215.3	151985	237606	172623	225438	152690	79252.9	83635.7	58966.9	41526.2	324459	131277	0.288695	0.0501586	0.0941252	0.743004	0.220333	0.443743
923.7675+++	3	923.768	0	MLOC_11070.1	GGSAGGGQSSLGYLFGDGEPAKPAAAPAAK	GGS[+80]AGGGQSSLGYLFGDGEPAKPAAAPAAK	118.96	AT1G69230.2	SP1L2 | SPIRAL1-like2 | chr1:26026543-26027085 REVERSE LENGTH=110	144.18	1	3.81944e-15	1.46645e-13	24956.9	30383.2	57514.7	21733.5	12842.2	27795.4	71509.1	22980.1	35546.9	35990.2	81431	46213	38039.7	33043.2	110611	14311.5	42284	30067	64894.1	58564.2	16794.5	16062.4	86308.4	13499.9	0.732885	0.0303543	0.575895	0.762569	0.0168213	0.571493
1019.4894++	2	1019.49	0	AK370305	SPGAAAGAPFLSICVTDPVK	S[+80]PGAAAGAPFLSIC[+57]VTDPVK	119.91	AT5G06140.1	SNX1, ATSNX1 | sorting nexin 1 | chr5:1856212-1858752 REVERSE LENGTH=402	142.54	1	5.57186e-15	2.00436e-13	101692	76057.5	108113	48232.9	104797	172259	146192	99470.8	72727.3	27733.2	49156.2	38887.4	29378.4	93808.1	85207.4	196055	50904.8	47029.4	32759	13011.2	14055.4	34514.9	137764	158594	0.309244	0.694554	0.10436	0.374215	0.118325	0.0826589
1158.5596++	2	1158.56	0	AK371626	DPSVNQVGSPVAASEPSGSILPK	DPSVNQVGS[+80]PVAASEPSGSILPK	117.71	AT2G47850.3	| Zinc finger C-x8-C-x5-C-x3-H type family protein | chr2:19595953-19598119 FORWARD LENGTH=468	141.89	1	6.47143e-15	2.24699e-13	673580	439881	506140	365400	554191	579399	481057	696171	280720	216647	253013	296008	228029	365711	461439	422525	91996.4	332470	261257	116900	69036.5	168988	550784	574549	0.926412	0.967965	0.679385	0.669046	0.278788	0.184102
1069.8219+++	3	1069.82	0	MLOC_54044.1	LEQDGTPTTAICSGATLVDNGEANQGPVSPK	LEQDGTPTTAIC[+57]SGATLVDNGEANQGPVS[+80]PK	117.87	AT1G15940.1	| Tudor/PWWP/MBT superfamily protein | chr1:5473672-5478050 FORWARD LENGTH=990	141.67	1	6.80769e-15	2.30365e-13	202703	127156	74891.7	91738.7	48186	197117	53078.6	80073.5	48066.2	112941	66810.5	128281	58682.5	46987.5	54980.6	30694.8	92051.7	33140.7	52977.8	101112	25484.1	27305.7	64167.5	58288.7	0.699187	0.399079	0.892519	0.484713	0.328743	0.530942
1028.9724++	2	1028.97	0	MLOC_39126.1	YGDVFDVSGDLAAQPVAPR	YGDVFDVS[+80]GDLAAQPVAPR	119.9	AT3G22500.1	ATECP31 | Seed maturation protein | chr3:7971920-7972865 REVERSE LENGTH=256	138.61	1	1.37721e-14	4.26294e-13	530592	438262	12026.7	15105.6	121210	155995	25050.2	10788.2	108178	36436.5	40374.7	31319.1	64149.5	32842.9	15824.7	9951.77	65937	11585.2	23215.8	23329.4	18112	26897.8	58741.8	22886	0.743359	0.293603	0.28996	0.941809	0.398915	0.21882
768.2995+++	3	768.3	0	MLOC_60138.1	MMLNSDGELEEEAETHAER	M[+16]M[+16]LNS[+80]DGELEEEAETHAER	110.39	AT1G60640.2	| unknown protein; FUNCTIONS IN: molecular_function unknown; INVOLVED IN: biological_process unknown; LOCATED IN: ce	138.37	1	1.45546e-14	4.4705e-13	121127	51519.9	93409	365638	87357.2	22854.5	41551.9	113603	49434.5	68024.4	65549	217384	119765	29587.4	30560.8	44011	1.42453e+06	103585	306156	127011	27892.2	11438.5	17477.3	22506.7	0.414002	0.493425	0.581163	0.172974	0.223193	0.666773
975.4618+++	3	975.462	0	MLOC_79165.2	VTIGEAMEAAALSAGDRPLEETDAAAIR	VTIGEAM[+16]EAAALS[+80]AGDRPLEETDAAAIR	119.2	AT3G22490.1	| Seed maturation protein | chr3:7969785-7970738 REVERSE LENGTH=262	138.32	1	1.47231e-14	4.48774e-13	751204	591494	511273	506754	120903	303897	291140	187388	236947	38215.6	451112	181298	126742	307814	273616	97491.6	111303	35351.2	407331	82947.1	18946.6	27998	411467	157048	0.62809	0.693812	0.671656	0.335937	0.0239155	0.274693
691.9962+++	3	691.996	1	MLOC_5598.2	KEEADSTINPATPPPAEVK	KEEADSTINPAT[+80]PPPAEVK	112.92	AT1G15340.1	MBD10 | methyl-CPG-binding domain 10 | chr1:5275895-5277474 REVERSE LENGTH=384	138.18	1	1.52055e-14	4.59966e-13	2.02393e+06	2.53963e+06	1.38608e+06	4.44931e+06	3.3014e+06	1.68041e+06	1.79119e+06	2.16561e+06	1.64258e+06	2.52913e+06	2.98802e+06	2.62057e+06	1.23303e+06	1.53804e+06	2.49369e+06	1.3133e+06	66441.8	60045.6	1.08807e+06	1.09254e+06	58896.1	725581	3.40298e+06	2.04351e+06	0.679108	0.542244	0.286056	0.847736	0.431837	0.782862
875.9404++	2	875.94	0	AK251104.1	VNSGGLSQQLVSPLGSK	VNSGGLSQQLVS[+80]PLGSK	115.12	AT5G18230.1	| transcription regulator NOT2/NOT3/NOT5 family protein | chr5:6021610-6027031 REVERSE LENGTH=843	137.68	1	1.70608e-14	5.00911e-13	268749	171783	146262	117740	249488	180815	191126	179726	78894.8	176371	168062	153621	143382	164909	222538	101440	179699	245155	191150	78044.5	44957.3	52256.8	267685	149644	0.748183	0.908907	0.420779	0.864647	0.327092	0.973879
1097.0198++	2	1097.02	0	MLOC_6831.3	IALDTSISNNEDALSPDLPK	IALDTSISNNEDALS[+80]PDLPK	119.64	AT3G18380.1	| sequence-specific DNA binding transcription factors;sequence-specific DNA binding | chr3:6311002-6313181 REVERSE L	137.46	1	1.79473e-14	5.19302e-13	173964	128107	98789.9	85026.2	35800.8	126024	99421.2	94822.6	60293.4	34212.6	69001.3	35685.6	31131	87181.3	120041	110312	19503.7	23696.2	26439.6	49005.3	6903.86	39765.4	119086	140090	0.717999	0.733559	0.621928	0.153011	0.0042576	0.0109919
585.9281+++	3	585.928	0	MLOC_67834.1	AASPDAAAAAAADNVFSR	AAS[+80]PDAAAAAAADNVFSR	119.75	AT2G42280.1	| basic helix-loop-helix (bHLH) DNA-binding superfamily protein | chr2:17611428-17613163 REVERSE LENGTH=359	137.41	1	1.81552e-14	5.21536e-13	763199	643012	610468	811832	705740	804125	525963	730625	471861	558138	572993	667564	559638	547177	533226	530900	654040	512556	472970	547689	232410	237573	561627	749051	0.594452	0.497549	0.714218	0.896845	0.797669	0.388512
709.6536+++	3	709.654	2	MLOC_63227.1	RNSRGEGEISEASEEQIR	RNS[+80]RGEGEISEASEEQIR	113.46	AT3G22640.1	PAP85 | cupin family protein | chr3:8011902-8013883 REVERSE LENGTH=486	136.03	1	2.49459e-14	6.8696e-13	44096.2	17603.9	54280.7	34934.1	188182	167590	61564.3	147952	85462.3	81664.3	65812	51639.5	163960	187351	133127	33264.7	204251	28950.1	42246.9	177779	54015.3	48655.7	62320.3	103580	0.317536	0.359663	0.748411	0.989515	0.373168	0.501529
1134.9813++	2	1134.98	0	MLOC_44788.1	MMESNPYFAVNAGSPLDVSK	M[+16]M[+16]ESNPYFAVNAGS[+80]PLDVSK	119.46	AT5G66010.1	| RNA-binding (RRM/RBD/RNP motifs) family protein | chr5:26399612-26400753 FORWARD LENGTH=255	135.83	1	2.61216e-14	7.14408e-13	109767	92348.6	64239	67278.1	36818.2	51217.8	24637.9	22878.7	63086.2	55723.3	52751.6	153484	159374	33751.7	29166.5	17879.9	78079.6	102356	31277.5	180093	42649.1	105242	63402.2	79387.3	0.993744	0.134622	0.306622	0.74441	0.433914	0.467946
818.8524++++	4	818.852	0	MLOC_1509.1	KPSNQQIASPPNYEDVTGDTQDNHHDER	KPS[+80]NQQIASPPNYEDVTGDTQDNHHDER	119.89	AT2G43160.1	| ENTH/VHS family protein | chr2:17948884-17953267 FORWARD LENGTH=895	135.69	1	2.69774e-14	7.32794e-13	57285.2	145887	213566	89738.9	132837	229667	166944	51604.1	137494	123284	90565.8	159060	82189.2	92732.3	128824	20334.7	282634	94724.3	132703	66084.5	197808	44295.2	174758	117105	0.631915	0.868679	0.528266	0.827714	0.649585	0.188289
1194.0242++	2	1194.02	0	AK369461	QVGYGATGTGTHDAGGYGGSGIAPR	QVGYGATGTGTHDAGGYGGS[+80]GIAPR	119.92	AT3G50980.1	XERO1 | dehydrin xero 1 | chr3:18942034-18942721 FORWARD LENGTH=128	135.66	1	2.71644e-14	7.32888e-13	310933	624448	432897	184876	470074	791214	548802	87642.6	235732	567033	1.18077e+06	166194	975094	651982	1.07448e+06	37952.1	238160	201371	1.18331e+06	205151	732088	335324	601763	74887.7	0.271525	0.116095	0.106734	0.551315	0.947257	0.0460915
792.8398++	2	792.84	0	MLOC_81057.1	MGSLSDGALQEGSPR	MGSLSDGALQEGS[+80]PR	119.88	AT1G09020.1	SNF4, ATSNF4 | homolog of yeast sucrose nonfermenting 4 | chr1:2900149-2904212 REVERSE LENGTH=487	134.08	1	3.90841e-14	9.69334e-13	91187.5	64763.9	118746	28363.8	143750	225503	101327	147278	104169	143698	145645	137087	166649	139803	164670	103579	118787	128372	99777.2	160586	159115	90586.1	168685	99117.1	0.794316	0.361146	0.932602	0.919966	0.661613	0.140777
800.8373++	2	800.837	0	MLOC_81057.1	MGSLSDGALQEGSPR	M[+16]GSLSDGALQEGS[+80]PR	118.16	AT1G09020.1	SNF4, ATSNF4 | homolog of yeast sucrose nonfermenting 4 | chr1:2900149-2904212 REVERSE LENGTH=487	133.84	1	4.13048e-14	1.01184e-12	392563	294429	246330	335607	534480	288949	193977	366237	259193	258097	320340	235457	252526	269009	292723	162905	118147	86741	230682	133238	101526	104401	264539	258431	0.697875	0.923129	0.838465	0.643479	0.758847	0.832206
847.7426+++	3	847.743	0	MLOC_67136.1	TAAAPVAPAPAAANAWGSLDANAASPK	TAAAPVAPAPAAANAWGSLDANAAS[+80]PK	119.86	AT3G01560.1	| Protein of unknown function (DUF1421) | chr3:219884-221707 FORWARD LENGTH=511	132.89	1	5.14044e-14	1.19336e-12	115667	104026	90716.4	67567.7	83829.1	138546	63102.3	65294.7	65854.3	59368.2	83861.8	105205	56701	112448	150876	66648.5	38879.9	18716.8	61524.7	54400.4	13306.1	35995.1	78064.9	61594.6	0.727496	0.848562	0.939	0.316352	0.268559	0.586304
867.7115+++	3	867.712	0	MLOC_72171.4	SIGATSEAGVIESDSASSLAHSDSDK	S[+80]IGATSEAGVIESDSASSLAHSDSDK	115.42	AT5G47690.3	| binding | chr5:19317899-19327014 FORWARD LENGTH=1607	132.82	1	5.22396e-14	1.20574e-12	49646.2	37170.6	61686.4	27462.1	51178.3	101277	100225	26839	48448.2	44269.2	97813.2	37328	64097.9	66360.8	143727	47330.2	143418	69359.8	57654.8	55985.2	62376.1	30150.6	171409	43280.5	0.455537	0.833263	0.341817	0.778847	0.0642156	0.0744263
1024.0279++	2	1024.03	1	AK371348	KASPPPQSVVLHVDHLSR	KAS[+80]PPPQSVVLHVDHLSR	119.68	AT1G16610.1	SR45, RNPS1 | arginine/serine-rich 45 | chr1:5675925-5678686 REVERSE LENGTH=414	132.73	1	5.33335e-14	1.22391e-12	1.18106e+06	2.01672e+06	2.52039e+06	4.0967e+06	2.26089e+06	2.73653e+06	2.12389e+06	1.33205e+06	2.88983e+06	4.27188e+06	2.57152e+06	3.59951e+06	3.06786e+06	2.63862e+06	2.29592e+06	2.21781e+06	1.82792e+06	6.56988e+06	2.80592e+06	3.71821e+06	3.20511e+06	1.73623e+06	2.536e+06	1.75332e+06	0.240642	0.318388	0.071563	0.354218	0.239781	0.0701251
555.2816+++	3	555.282	0	MLOC_5053.2	SVIAEAEAGGSPALIAK	SVIAEAEAGGS[+80]PALIAK	117.04	AT4G10070.1	| KH domain-containing protein | chr4:6295608-6299759 REVERSE LENGTH=725	131.55	1	6.99842e-14	1.53542e-12	2.43125e+06	1.46627e+06	1.06765e+06	1.21921e+06	2.12652e+06	1.78685e+06	1.04365e+06	1.29448e+06	670640	512220	1.19677e+06	633159	1.16639e+06	1.35696e+06	1.17713e+06	671057	234681	404015	825356	324302	277919	441220	1.39206e+06	1.10221e+06	0.713318	0.914791	0.645406	0.99477	0.981782	0.7945
770.7940++	2	770.794	0	MLOC_51340.2	VDSQGQMCGSTFK	VDS[+80]QGQM[+16]C[+57]GSTFK	101.84	AT5G43830.1	| Aluminium induced protein with YGL and LRDR motifs | chr5:17622593-17624239 REVERSE LENGTH=251	131.33	1	7.36207e-14	1.58047e-12	426594	969496	39556.8	737298	85931.8	1.16458e+06	13139.6	335477	248516	456091	564328	551789	426877	1.02182e+06	336723	12546.6	201467	251088	58437.3	220438	59587.1	30473.6	71636.5	28996.6	0.356616	0.736703	0.331544	0.281983	0.766293	0.70818
1039.3998++	2	1039.4	0	MLOC_7217.1	SPYADGYDGFASSYNNGGR	S[+80]PYADGYDGFASSYNNGGR	115.64	AT3G13224.2	| RNA-binding (RRM/RBD/RNP motifs) family protein | chr3:4254848-4256621 FORWARD LENGTH=358	130.43	1	9.05733e-14	1.87388e-12	55652	39832.4	68503.8	75328.4	49203.4	43890.3	22032.6	70783.5	44970.1	56269.4	33279	37141.7	37586.4	50515.4	32020.7	63172.3	117996	155042	145813	166188	44320.4	31398.6	221219	62297.3	0.815462	0.825963	0.683632	0.80432	0.536065	0.015105
881.4322+++	3	881.432	0	MLOC_69690.1	DAGVSPAPPIGTLTSALANATPEQQR	DAGVS[+80]PAPPIGTLTSALANATPEQQR	119.8	AT4G34110.1	PAB2, PABP2, ATPAB2 | poly(A) binding protein 2 | chr4:16336732-16339892 FORWARD LENGTH=629	130.2	1	9.54993e-14	1.93568e-12	381812	668292	906801	493739	780633	1.05958e+06	546269	380082	137144	60881.6	587783	146090	305667	555893	727637	217104	43969.2	49742.5	109931	38164.9	15922.4	202430	766194	322202	0.781928	0.302923	0.836379	0.526596	0.311702	0.814236
951.9535++	2	951.953	0	MLOC_56942.2	DGGSFGKPSGGPSLSVFVK	DGGS[+80]FGKPSGGPSLSVFVK	119.87	AT3G18610.1	PARLL1, ATNUC-L2, NUC-L2 | nucleolin like 2 | chr3:6404270-6407822 REVERSE LENGTH=636	128.63	1	1.37088e-13	2.6317e-12	26304.5	105630	311035	82342.3	123123	157547	265483	55715.1	42844.6	61959	264860	99984.9	140973	309130	371308	45993.6	73548.1	146077	175697	115181	54508.6	215222	258372	28340.7	0.13423	0.0403662	0.0543428	0.0999184	0.0236124	0.150024
839.6979+++	3	839.698	0	AK364491	AVDVTGPDGSFVQGGAGGGGGGGGGFGSR	AVDVTGPDGSFVQGGAGGGGGGGGGFGS[+80]R	116.38	AT4G36020.1	CSDP1 | cold shock domain protein 1 | chr4:17043443-17044342 REVERSE LENGTH=299	128.07	1	1.55955e-13	2.88301e-12	69815.8	90865.7	76234.1	38344.5	49736.5	103199	56768.1	26844.1	64811.8	55459.1	112596	65839.9	71631.3	106812	87805.4	30005.3	85007.9	41010	87010.3	100546	37680.9	82353.1	96103.4	44201.4	0.570469	0.227274	0.818117	0.038136	0.178618	0.185054
875.9404++	2	875.94	0	AK251104.1	VNSGGLSQQLVSPLGSK	VNS[+80]GGLSQQLVSPLGSK	118.47	AT5G18230.1	| transcription regulator NOT2/NOT3/NOT5 family protein | chr5:6021610-6027031 REVERSE LENGTH=843	127.82	1	1.65196e-13	3.012e-12	69388.3	134134	120066	42891.2	68231.3	60251.5	35025.5	38542.5	41858.2	264148	107331	56586.9	123892	49899.7	50076.9	35823.3	65266.3	70781.5	56966.4	64454.1	47309.2	35367.3	36348.4	56436.6	0.232296	0.230324	0.719797	0.321494	0.234227	0.266845
637.3091+++	3	637.309	1	MLOC_11333.2	SGSGISNIDRKPSGGIER	SGSGISNIDRKPS[+80]GGIER	107.96	AT5G11980.1	| conserved oligomeric Golgi complex component-related / COG complex component-related | chr5:3868809-3872146 REVERS	126.9	1	2.04174e-13	3.59148e-12	201100	20844.1	101328	48855.2	23524.5	153640	101910	11744	100691	217229	175307	138434	267879	175350	142746	8337.66	55808.9	128535	129019	302799	98995.5	44347.4	123257	10932.4	0.969008	0.770644	0.642541	0.949582	0.927778	0.239136
781.9966+++	3	781.997	0	MLOC_70500.1	TPPVESVESEDEDGFPVSESK	TPPVESVES[+80]EDEDGFPVSESK	119.22	AT4G25340.1	FKBP53, ATFKBP53 | FK506 BINDING PROTEIN 53 | chr4:12959657-12962632 REVERSE LENGTH=477	126.2	1	2.39883e-13	4.18277e-12	150897	29170.9	701779	947635	56844.5	26286.8	62519.3	1.22848e+06	36495.1	153292	124820	422948	68960	32548.6	129044	309889	217180	99415.2	101697	69044.3	93465.3	30404.8	47391.4	183306	0.567368	0.480909	0.316603	0.0580742	0.832416	0.267906
955.4584++	2	955.458	0	AK374271	VATPESPAPVAPAANYFK	VATPES[+80]PAPVAPAANYFK	118.12	AT1G76890.2	GT2, AT-GT2 | Duplicated homeodomain-like superfamily protein | chr1:28873211-28875203 REVERSE LENGTH=575	125.35	1	2.91743e-13	4.93614e-12	176799	176799	136229	124780	148203	197153	159932	200336	88219.1	34720.5	190077	51390.6	63051.8	147893	140671	129254	50635.5	32044.8	87790.4	44593	22114.4	79899.5	223870	186414	0.718672	0.540592	0.535801	0.294132	0.119175	0.116353
1030.0166++	2	1030.02	0	MLOC_67631.1	ASPETLLPSLSIWPPSQR	AS[+80]PETLLPSLSIWPPSQR	113.01	AT1G47200.1	WPP2 | WPP domain protein 2 | chr1:17298181-17298723 REVERSE LENGTH=180	124.28	1	3.7325e-13	6.10815e-12	15304.4	9967.43	91633.1	3921.83	14885.1	68017.3	88221.9	8162.55	22164.9	27827.2	19702	3865.57	10471.5	23460.4	41955	34192.2	57318.6	31081.5	24649.1	25048.8	42455.5	31554.5	59333.7	9576.3	0.613508	0.641291	0.257292	0.357427	0.0946099	0.713184
872.4210++	2	872.421	1	AK364999	KLTSMASNIISDLDR	KLTSMAS[+80]NIISDLDR	119.82	AT4G17890.1	AGD8 | ARF-GAP domain 8 | chr4:9937121-9939146 FORWARD LENGTH=413	124.22	1	3.78443e-13	6.16784e-12	120767	121502	50424	27375.7	128895	46487.7	147085	47161.1	58266.8	17799.9	38724.4	108923	11610.1	41878.9	85651.8	184290	15527.5	4632.67	25273	27281.1	18734.3	324016	293080	100450	0.74818	0.48464	0.817009	0.490306	0.189535	0.372868
1008.4323+++	3	1008.43	1	AK249875.1	RDSPAPINEEVEMTEADDVDNAAVPDK	RDS[+80]PAPINEEVEM[+16]TEADDVDNAAVPDK	119.81	AT3G22440.1	| FRIGIDA-like protein | chr3:7959854-7961886 FORWARD LENGTH=532	124	1	3.98107e-13	6.4358e-12	77360.7	47588.4	28654.1	42439.9	39603.7	35457	44639.4	21003.7	47580.9	63305.1	35517.8	41688.3	37301.4	64598.5	18281.7	21529.7	142584	117574	67914.6	183621	24724.4	12217.3	35372.5	34622.6	0.735789	0.277576	0.999001	0.843604	0.909469	0.293469
761.8743++	2	761.874	0	MLOC_53215.1	VPGVNVNSVAFSPR	VPGVNVNSVAFS[+80]PR	115.63	AT4G03110.1	AtRBP-DR1, RBP-DR1 | RNA-binding protein-defense related 1 | chr4:1376612-1379275 REVERSE LENGTH=441	123.32	1	4.65586e-13	7.26205e-12	455143	325184	292538	403499	422742	362639	275753	436645	171217	192232	346417	139974	429897	336553	318844	216336	119700	91485.4	262907	125958	114537	135548	379381	670198	0.737483	0.675708	0.864898	0.749798	0.985183	0.529197
843.3669++	2	843.367	0	MLOC_54346.5	DNSPTQTSVVIDDSK	DNS[+80]PTQTSVVIDDSK	119.97	AT1G55860.2	UPL1 | ubiquitin-protein ligase 1 | chr1:20879900-20892910 REVERSE LENGTH=3681	122.33	1	5.8479e-13	8.94662e-12	170836	137376	107170	124229	216081	160422	124326	123813	115262	178549	91898.4	280520	128625	188562	104932	51781.7	238787	152092	63334	864774	48156.3	27899.1	129195	177463	0.664961	0.147641	0.390303	0.943589	0.836877	0.840838
926.9437++	2	926.944	0	MLOC_82049.1	AVTPTATGSSSAAVAAASPR	AVTPTATGSSSAAVAAAS[+80]PR	116.69	AT2G17705.1	| unknown protein; FUNCTIONS IN: molecular_function unknown; INVOLVED IN: biological_process unknown; LOCATED IN: pl	122.08	1	6.19441e-13	9.40467e-12	26973.1	19515.1	66230	63676.3	10198.1	48287.9	57432	69163.1	30053.5	24938.3	28920.4	15424.7	14522.4	32646.7	32680.8	15189.1	30237.5	37650.1	23267.5	18365.3	12889.8	4608.29	31688.7	10602.6	0.783215	0.52271	0.848155	0.339402	0.0810212	0.417171
701.0208+++	3	701.021	0	MLOC_44066.1	QQVPAAIPVSPANYIAEPR	QQVPAAIPVS[+80]PANYIAEPR	119.69	AT3G46920.1	| Protein kinase superfamily protein with octicosapeptide/Phox/Bem1p domain | chr3:17280430-17284857 REVERSE LENGTH=	121.87	1	6.5013e-13	9.79611e-12	403535	309342	236053	17785.4	67453.4	475133	465597	91063.2	202841	167690	291832	35355.3	171743	273999	292830	62177.9	50044.1	167984	150502	41801.9	52096.3	116864	290580	35808.7	0.976157	0.953109	0.209708	0.224516	0.0353463	0.491724
983.4751++	2	983.475	0	MLOC_5484.1	ASALAALSNAAFNPSPQQK	ASALAALSNAAFNPS[+80]PQQK	119.68	AT2G41740.1	VLN2, ATVLN2 | villin 2 | chr2:17410962-17416878 REVERSE LENGTH=976	121.83	1	6.56145e-13	9.84958e-12	268076	203430	200557	66120.7	193144	214544	179994	17465.9	157641	117627	253843	44562.8	106991	136056	173594	27791.8	46440.5	63905.8	95740.5	69899.4	34003.1	44599.4	166490	26671.3	0.726922	0.763926	0.270654	0.782016	0.31144	0.198485
872.4006+++	3	872.401	1	MLOC_71715.1	RVVKPDPPTEDDEEEETPLPSR	RVVKPDPPT[+80]EDDEEEETPLPSR	119.94	AT1G09060.3	| Zinc finger, RING-type;Transcription factor jumonji/aspartyl beta-hydroxylase | chr1:2921235-2925254 REVERSE LENGT	121.56	1	6.98232e-13	1.03645e-11	22404.6	11154.9	125435	123739	7540.46	10764.4	169977	334148	29067.1	46752.9	33554.5	388003	27092.2	12363.5	125043	150354	46743.4	67035.3	54565	43578.2	20474.3	10605.9	84959	253719	0.667579	0.312657	0.281537	0.342237	0.0501833	0.0510211
786.0680+++	3	786.068	2	MLOC_63303.2	DSSAITIEKLSPLKEETVTSK	DSSAITIEKLS[+80]PLKEETVTSK	115.58	AT1G08820.2	VAP27-2 | vamp/synaptobrevin-associated protein 27-2 | chr1:2821810-2824412 REVERSE LENGTH=386	121.4	1	7.24436e-13	1.06741e-11	277997	168604	147418	86640.9	135968	152613	129973	87146.6	124573	87747.3	166115	51265.3	141518	116352	157569	54135.2	47863.7	53958.7	82699.9	60126.1	35337.2	34284.3	142211	72627.2	0.600205	0.825808	0.344189	0.952318	0.385863	0.454323
806.6813+++	3	806.681	0	MLOC_39684.1	GQQGHAVDEYGDPVAVHGSMGAR	GQQGHAVDEYGDPVAVHGS[+80]MGAR	119.84	AT3G50980.1	XERO1 | dehydrin xero 1 | chr3:18942034-18942721 FORWARD LENGTH=128	120.36	1	9.2045e-13	1.31263e-11	64726.6	110545	84190.2	35709.6	79819.5	224137	131980	17289.2	112548	501990	161465	89084.9	123942	292358	277842	11612.8	239061	139562	103859	284514	79160.2	166944	101795	90252.4	0.497713	0.73341	0.981242	0.076326	0.308676	0.159717
1015.9100++	2	1015.91	0	AK376429	FDSFGSSAELGGSNDTFGR	FDS[+80]FGSSAELGGSNDTFGR	119.82	AT1G21630.1	| Calcium-binding EF hand family protein | chr1:7581457-7587796 FORWARD LENGTH=1218	119.56	1	1.10662e-12	1.53429e-11	26991.9	52624.2	71310	78203.7	12689.8	62425.2	31826.7	34627.2	86522.8	47369.5	54190.7	50664.1	38274.7	43731	57445	22121.6	104194	155293	132826	81173	19421.1	30998.7	38071.9	19543.3	0.785892	0.712364	0.928721	0.158529	0.178968	0.840227
747.0716++++	4	747.072	1	MLOC_52203.1	RHLGVASDDEEADAHSNQITEEYYR	RHLGVAS[+80]DDEEADAHSNQITEEYYR	119.86	AT3G57300.1	INO80, ATINO80 | INO80 ortholog | chr3:21199612-21207635 FORWARD LENGTH=1507	119.03	1	1.25026e-12	1.66409e-11	9824.42	19632.7	39415.1	48594.4	14351.9	77260	19275.6	48269.6	19518.1	42896.7	56000.4	83589.5	28299	45095.8	19437.6	11103.6	55205.5	51343.3	43699	79798	38727.8	7678.87	22469.3	81748	0.60031	0.340668	0.0958933	0.526089	0.445121	0.453702
764.6824+++	3	764.682	0	MLOC_59084.1	VQSLGSSMSHTFASAVGSSISR	VQS[+80]LGSSM[+16]SHTFASAVGSSISR	119.56	AT3G10360.1	APUM4, PUM4 | pumilio 4 | chr3:3211276-3215144 REVERSE LENGTH=1003	118.97	1	1.26765e-12	1.67607e-11	149580	124762	124025	167267	55903.3	58498.3	57233.9	70893.1	104363	84293.3	367280	145032	93580.9	107051	131374	25422.1	56991.7	94405.5	132020	80402.3	119039	19158.2	109201	91821.6	0.94012	0.341471	0.518121	0.43841	0.755517	0.391711
762.7966++	2	762.797	0	MLOC_51340.2	VDSQGQMCGSTFK	VDS[+80]QGQMC[+57]GSTFK	119.57	AT5G43830.1	| Aluminium induced protein with YGL and LRDR motifs | chr5:17622593-17624239 REVERSE LENGTH=251	118.89	1	1.29122e-12	1.69044e-11	125260	73697.8	118068	30325.6	332942	241798	198893	98167.2	321181	263224	80992.3	211642	134234	166606	258436	47358	126095	122534	58921.3	320795	89090.3	261802	299464	86930.1	0.692318	0.260126	0.977598	0.682871	0.493174	0.293577
884.0755+++	3	884.076	0	MLOC_53435.4	HAAPAPAAGPAMAPDPASPAIGEFSPR	HAAPAPAAGPAM[+16]APDPASPAIGEFS[+80]PR	115.47	AT5G40480.1	EMB3012 | embryo defective 3012 | chr5:16213361-16223982 FORWARD LENGTH=1923	118.77	1	1.32739e-12	1.73212e-11	70435.7	54450.4	57461.1	43772.6	31361.4	21935.5	61269.8	89243.9	48443.7	36286.7	91440.4	77001.3	34134.3	52484.3	53555.6	43902.2	104149	70748.9	73546.8	54069.8	31422.2	18574	118050	98410.5	0.359615	0.9925	0.458798	0.91487	0.155894	0.117075
1012.9447++	2	1012.94	0	MLOC_39684.1	SAAGAFTGAGGQLQHGTEER	S[+80]AAGAFTGAGGQLQHGTEER	119.9	AT3G50980.1	XERO1 | dehydrin xero 1 | chr3:18942034-18942721 FORWARD LENGTH=128	118.48	1	1.41906e-12	1.83971e-11	62837	78326.3	47126.8	74158.2	185157	166376	39099.9	21876	68586.4	267155	65882.1	154925	189096	97389.2	100158	80894.3	382015	123370	82715.1	334602	41219.2	41124.1	27193.1	108289	0.909142	0.422804	0.906034	0.58627	0.261835	0.302946
811.8371++	2	811.837	0	MLOC_7938.1	GGVYGGGSAVGPDYMR	GGVYGGGS[+80]AVGPDYMR	109.73	AT4G25140.1	OLEO1, OLE1 | oleosin 1 | chr4:12900498-12901259 FORWARD LENGTH=173	118.48	1	1.41906e-12	1.83375e-11	33468	94720.7	75221.4	399639	43602.4	193433	33160	546157	46603.5	18950.7	380236	361927	481548	496691	212383	21528.5	168170	122032	30421.1	16623.2	50260.6	33817.8	151325	13790.4	0.94191	0.571095	0.304922	0.819174	0.736621	0.993485
1080.5510++	2	1080.55	0	AK250311.1	ALVVQPAADVAGTSEAVAVSPK	ALVVQPAADVAGTSEAVAVS[+80]PK	102.15	AT1G51200.4	| A20/AN1-like zinc finger family protein | chr1:18985690-18986211 FORWARD LENGTH=173	118.31	1	1.47571e-12	1.89469e-11	16362.1	10282	16572.6	28393.4	15731	42029.9	44854	154643	31433	15201.7	19841.2	60444.7	14517.9	17327.1	30263	80900.6	43457.2	43946.4	57189.6	34308.9	22541.1	20136.4	12968.6	166112	0.617463	0.96213	0.4603	0.391015	0.343065	0.0492745
823.7281+++	3	823.728	0	MLOC_60302.1	SDSIPLNSPPVKPTEQEFFTR	SDSIPLNS[+80]PPVKPTEQEFFTR	119.62	AT1G34220.2	| Regulator of Vps4 activity in the MVB pathway protein | chr1:12463102-12465911 REVERSE LENGTH=619	118.01	1	1.58125e-12	2.02369e-11	595675	617823	806308	467340	127924	539047	546491	935027	322419	264694	767771	355699	318895	512080	593119	395765	42945.1	56743.8	542591	45101.5	8966.48	178220	769363	801341	0.976666	0.165017	0.888719	0.177728	0.0232971	0.0571576
849.4120+++	3	849.412	1	MLOC_57183.1	SELVAAAAEPKSPVALAAFDGFFSA	SELVAAAAEPKS[+80]PVALAAFDGFFSA	102.69	-	-	117.19	1	1.90985e-12	2.361e-11	9891.11	11947.5	12834.5	36464.9	12216.5	30368	18969.1	110535	23614.1	16202.8	12822.4	27693	921.771	26842.1	19298.5	48202.9	31189.5	25441.3	35788.9	8361.75	18954.9	12528.5	6922.88	68877.3	0.651232	0.919559	0.817841	0.196327	0.558488	0.0759889
727.2908++	2	727.291	0	MLOC_7217.1	SGGSYGGGLGDAYGR	S[+80]GGSYGGGLGDAYGR	119.65	AT3G13224.2	| RNA-binding (RRM/RBD/RNP motifs) family protein | chr3:4254848-4256621 FORWARD LENGTH=358	116.99	1	1.99986e-12	2.45706e-11	104958	80509.1	75548.8	39427.4	61901.4	121526	63077.4	32937.1	168826	84506.1	79379.4	72187	147973	117228	66173.1	32953.5	164681	399904	350262	352838	121730	25901.3	43841	74705	0.733506	0.833695	0.93981	0.618034	0.183413	0.115863
945.9591++	2	945.959	0	MLOC_63525.2	GSWPGVGSPVNDVLASLR	GSWPGVGS[+80]PVNDVLASLR	100.89	AT2G19810.1	| CCCH-type zinc finger family protein | chr2:8550419-8551498 FORWARD LENGTH=359	116.05	1	2.48313e-12	2.95094e-11	15572.9	25407.6	77811.3	23630	1909.6	48939.2	62909.6	40116.6	18556.5	12879.4	18763.1	4737.63	3335.35	11930.5	43012.2	37431.6	33713.7	22702.7	47635.9	5128.33	11734.7	14007.6	45181.2	31401.7	0.758506	0.291881	0.265728	0.259632	0.0237011	0.00462855
1035.4316++	2	1035.43	0	MLOC_63428.1	DASPGQVNQDSSQEFQPR	DAS[+80]PGQVNQDSSQEFQPR	119.94	AT3G55020.1	| Ypt/Rab-GAP domain of gyp1p superfamily protein | chr3:20389278-20394713 REVERSE LENGTH=777	115.88	1	2.58226e-12	3.03264e-11	53059.6	61252.1	67389.5	25352.2	77708.6	77712.2	42123.5	30813.8	50167	29779.5	51508.3	52045	46053.7	20202.8	39769.4	26036	25744.5	23549.6	49172.5	19795	14507	26123.8	33575.7	11197.5	0.763068	0.298265	0.480831	0.865928	0.719947	0.346613
833.3524+++	3	833.352	0	AK361400	RPAASVGSDDEEGSGGDDSGAIAAAR	RPAASVGSDDEEGS[+80]GGDDSGAIAAAR	108.28	AT1G01350.1	| Zinc finger (CCCH-type/C3HC4-type RING finger) family protein | chr1:136732-137970 FORWARD LENGTH=343	115.35	1	2.91743e-12	3.38642e-11	275239	39456.7	72804.8	26198.8	10636.1	205804	4179.7	11917.6	48095.4	72649.8	95769.3	23608.3	60201.6	384738	172288	14099.6	570862	311720	566384	1.5497e+06	27729.9	68687.3	58936.1	18954.7	0.433837	0.825549	0.700875	0.181189	0.469909	0.347833
943.9246++	2	943.925	0	MLOC_56421.5	ELDTSSVGYQSPLPADK	ELDTSSVGYQS[+80]PLPADK	119.78	AT1G76010.1	| Alba DNA/RNA-binding protein | chr1:28528505-28530488 REVERSE LENGTH=350	115.24	1	2.99226e-12	3.45321e-11	35621.9	38667.9	42940.4	44161.2	27428	43030.7	33853.4	41485.5	67878.7	118030	27481.3	47822.5	200694	44365.4	28190.8	44811	446181	456243	201662	521748	153094	49317.9	32617.5	27403.3	0.915888	0.584117	0.924071	0.255749	0.20599	0.228249
991.0295++	2	991.03	0	AK359448	KPSPAPAPDGPSLVLLVSR	KPS[+80]PAPAPDGPSLVLLVSR	119.84	AT1G16610.1	SR45, RNPS1 | arginine/serine-rich 45 | chr1:5675925-5678686 REVERSE LENGTH=414	113.62	1	4.3451e-12	4.79282e-11	247829	184368	228513	341952	311308	308455	111885	43862.8	226751	179973	139187	129713	218091	252506	281468	231758	64311.9	42901.7	121628	43160.9	54847.9	39125.3	14491.3	110514	0.596248	0.820509	0.944447	0.965095	0.624524	0.528719
757.3646++++	4	757.365	2	MLOC_52193.1	RVDDSQKWAELDTGSTTIAFTALHQR	RVDDS[+80]QKWAELDTGSTTIAFTALHQR	119.8	AT1G07645.1	ATDSI-1VOC, DSI-1VOC | dessication-induced 1VOC superfamily protein | chr1:2367612-2368349 REVERSE LENGTH=137	113.15	1	4.84172e-12	5.25353e-11	64736	89138	55399.5	23459	36573.4	94639	95637.9	72476	56309.8	38669.2	98708.9	30309.2	107834	43230.2	104171	27396.3	29028.3	55736.3	70431.1	33127.8	42676.1	17061	35333.9	79505.2	0.585651	0.232862	0.19958	0.76142	0.645636	0.932802
646.5986+++	3	646.599	0	MLOC_63227.1	SGESGRPYHFGEESYR	SGES[+80]GRPYHFGEESYR	119.92	AT3G22640.1	PAP85 | cupin family protein | chr3:8011902-8013883 REVERSE LENGTH=486	112.67	1	5.40754e-12	5.75795e-11	51324.7	24462	65545.9	34593.7	210080	220634	103267	311070	117288	71676.6	198648	1.37725e+06	168658	168115	183238	158784	187142	239773	646037	217248	116121	439372	294230	251563	0.936297	0.412245	0.420657	0.33154	0.688208	0.242248
765.6785+++	3	765.679	2	MLOC_5540.1	VDSKGEVCGTTYTVDEQAKK	VDS[+80]KGEVC[+57]GTTYTVDEQAKK	109.79	AT3G22850.1	| Aluminium induced protein with YGL and LRDR motifs | chr3:8089067-8090275 FORWARD LENGTH=248	111.17	1	7.63836e-12	7.7806e-11	165803	39049.4	110946	85855.1	57872.7	262672	209905	99050.9	115149	200157	113776	59873.2	192031	260472	337112	25345.3	47443	135418	162917	109325	47140.6	42920.4	229595	125687	0.807757	0.656768	0.578032	0.376188	0.0793049	0.796016
833.0253+++	3	833.025	1	MLOC_70449.2	KADSAPDVADEDETQAAVEQAEK	KADS[+80]APDVADEDETQAAVEQAEK	112.78	AT5G14520.1	| pescadillo-related | chr5:4680789-4684330 REVERSE LENGTH=590	110.86	1	8.20352e-12	8.31387e-11	16050	21892	244102	50943.1	17270.7	24312.2	83183.6	53762.9	27036	39690.8	61299.8	91735.5	725288	76899.4	42356.4	68933.9	2.05934e+06	31425.9	1.21975e+06	2.18756e+06	1.36783e+06	19858	12882.9	73508.8	0.428063	0.818471	0.943077	0.23155	0.2344	0.243524
1006.4702++	2	1006.47	1	MLOC_53798.1	REIGGDSPAAATTAATVATTA	REIGGDS[+80]PAAATTAATVATTA	119.4	AT4G14800.1	PBD2 | 20S proteasome beta subunit D2 | chr4:8500398-8502058 FORWARD LENGTH=199	110.77	1	8.37529e-12	8.46647e-11	409493	432736	297264	378326	500097	479769	344942	426314	170646	127570	225764	214590	196354	372626	433638	310159	117604	73752.8	215793	587404	79187.2	26954.8	55797.7	70946.3	0.891678	0.89685	0.33488	0.864025	0.915354	0.952364
864.3623++	2	864.362	0	MLOC_80687.1	HNDGFDSVAQSPAFR	HNDGFDSVAQS[+80]PAFR	119.74	AT4G09510.1	CINV2 | cytosolic invertase 2 | chr4:6021312-6023310 REVERSE LENGTH=558	110.3	1	9.33254e-12	9.36303e-11	243440	221216	192777	170643	256441	223135	142909	159631	270636	245336	271947	273535	226110	274747	234046	186406	639018	153846	202241	234211	174805	113001	222882	137465	0.306596	0.338746	0.350659	0.798769	0.642702	0.127603
901.7272+++	3	901.727	1	AK369153	SRSEESDDEDAIAESPPPAPTPTPK	SRSEESDDEDAIAES[+80]PPPAPTPTPK	119.65	AT1G61730.1	| DNA-binding storekeeper protein-related transcriptional regulator | chr1:22793447-22794577 REVERSE LENGTH=376	109.97	1	1.00693e-11	1.00017e-10	318299	465809	36384.3	25923.7	501185	397443	11950.1	5587.6	228475	424947	64959.5	52743.3	371002	293540	36204.3	7941.81	69571.8	46505.9	84511.4	33152.8	33547.3	52498.7	11460.3	18356	0.532292	0.192229	0.148272	0.774769	0.180733	0.171846
797.8740++	2	797.874	0	MLOC_39126.1	GGPAAVMQSAATINAR	GGPAAVMQSAAT[+80]INAR	119.76	AT3G22500.1	ATECP31 | Seed maturation protein | chr3:7971920-7972865 REVERSE LENGTH=256	109.77	1	1.05439e-11	1.03699e-10	22818.5	18473.9	331757	33134.9	20575.8	133605	409047	125723	18738.5	85846.3	101218	33096.1	36928.4	76661.5	422142	51184.8	53162.1	132072	67099.3	37722.5	23217.5	50439.1	320558	25822.7	0.306839	0.2483	0.805327	0.139054	0.00808818	0.312862
1088.9935++	2	1088.99	0	MLOC_70601.1	AGDSVQLPTETSPYVQYNK	AGDS[+80]VQLPTETSPYVQYNK	117.32	AT2G33690.1	| Late embryogenesis abundant protein, group 6 | chr2:14252199-14252414 FORWARD LENGTH=71	109.55	1	1.10917e-11	1.08287e-10	224175	200529	79870.6	88412.1	203775	241957	92252.4	15039.2	97909.7	47247.6	108780	54493.7	81951.2	141713	176478	8407.85	89272.6	39760.5	78515.1	82821.7	54989.4	62206	112044	27081.1	0.587543	0.394777	0.301663	0.647698	0.815179	0.170729
640.3227+++	3	640.323	0	AK371348	ASPPPQSVVLHVDHLSR	AS[+80]PPPQSVVLHVDHLSR	110.97	AT1G16610.1	SR45, RNPS1 | arginine/serine-rich 45 | chr1:5675925-5678686 REVERSE LENGTH=414	108.73	1	1.33968e-11	1.27974e-10	1.3073e+06	1.22965e+06	432904	1.52672e+06	1.2627e+06	1.19058e+06	155561	1.25269e+06	879252	1.58974e+06	1.21515e+06	1.64484e+06	1.55968e+06	516274	981835	112606	87142.7	263951	162661	265718	141903	51891.3	140911	41885.1	0.647661	0.767441	0.543651	0.513442	0.353693	0.439145
997.9752++	2	997.975	0	AK362289	AGSEGLQPVADESLSSVIR	AGS[+80]EGLQPVADESLSSVIR	119.91	AT2G43410.1	FPA | RNA binding | chr2:18026397-18030989 REVERSE LENGTH=858	108.48	1	1.41906e-11	1.34912e-10	89364.6	51878.4	82083.5	66539.8	79357.1	75695.9	57862.3	121272	35859.2	19097.5	75112.9	68731.6	26488.8	50751.2	99044.5	103105	29610.1	35241.8	44823.3	67213.2	30637.5	38976.4	47120.6	108802	0.524376	0.528772	0.490611	0.66457	0.403504	0.0664499
879.9065++	2	879.907	0	AK354857	QGSGIIGTFGQSEELR	QGS[+80]GIIGTFGQSEELR	119.56	AT5G15070.1	| Phosphoglycerate mutase-like family protein | chr5:4876898-4885615 FORWARD LENGTH=1049	108.47	1	1.42233e-11	1.34902e-10	88487.3	76497.3	91619.6	80484.6	67989.2	65836.6	59017.5	86575.8	61311.2	35715.7	223177	45531.9	63515.8	53852.2	179142	59730.2	359120	48723.3	75337.2	51652.7	38990	33475.9	71109.3	57351.3	0.349726	0.74454	0.367743	0.688125	0.359665	0.457691
1101.0012++	2	1101	0	MLOC_65819.2	ELLGSGYYDAFPYTQGLAR	ELLGS[+80]GYYDAFPYTQGLAR	93.89	AT1G02080.2	| transcription regulators | chr1:373694-386682 FORWARD LENGTH=2377	108.34	1	1.46555e-11	1.38344e-10	49938.7	38437.5	49293.9	34499.7	39971	58955.9	33585.3	7282.7	38103.8	20042.8	79999.6	70225.2	194779	28490.7	36745.5	9383.55	40216.6	16157.3	41601.9	153654	16165.9	4707.72	66795.6	17786.4	0.105177	0.366753	0.346161	0.458869	0.574151	0.32708
935.1078+++	3	935.108	1	AK252415.1	RAFLSVGNLAELYDSVDGSGFGPHSK	RAFLS[+80]VGNLAELYDSVDGSGFGPHSK	97.89	AT5G54440.1	CLUB, AtTRS130 | CLUB | chr5:22100056-22107695 FORWARD LENGTH=1259	108.29	1	1.48252e-11	1.39615e-10	55440.9	61978.8	36504	19820	71656.1	36362.9	33521.5	16427.7	25106	33952.8	29306.3	43603.1	14037.3	33227.9	49104.9	15507.7	55241.6	37754.8	30499.8	78740	27825.6	22511.5	54531.4	13243.7	0.961483	0.330416	0.921552	0.728147	0.711286	0.320584
746.5999++++	4	746.6	1	MLOC_72630.1	REEASGSVSSEEQEVILSEVEEQKPK	REEASGSVSSEEQEVILS[+80]EVEEQKPK	119.67	AT3G01930.2	| Major facilitator superfamily protein | chr3:319289-321488 REVERSE LENGTH=584	108.07	1	1.55955e-11	1.46181e-10	190831	97191.3	142534	141744	16590.6	138748	116685	144573	279857	228366	181079	392980	536705	232595	119164	122017	512005	509587	636130	745222	109109	3.83906e+06	88232.7	240558	0.771529	0.969641	0.653528	0.437307	0.555051	0.782553
722.3080++	2	722.308	0	AK357485	YGLGSPGGPGAMGAR	YGLGS[+80]PGGPGAM[+16]GAR	119.9	AT1G67325.1	| Ran BP2/NZF zinc finger-like superfamily protein | chr1:25209825-25212412 REVERSE LENGTH=287	107.91	1	1.61808e-11	1.50958e-10	352257	292364	225228	324523	371101	235533	257470	533281	252223	298500	358687	267565	423575	319527	268002	250451	178839	129459	225169	307187	95122.1	169891	504685	619967	0.797069	0.906285	0.54174	0.668797	0.742709	0.339271
713.3596+++	3	713.36	0	AK357176	LAASATAALGSPPPAAASPTAHK	LAASATAALGS[+80]PPPAAASPTAHK	119.9	AT4G15930.1	| Dynein light chain type 1 family protein | chr4:9036344-9037825 FORWARD LENGTH=123	107.73	1	1.68655e-11	1.56614e-10	276517	298317	497127	129888	336524	261120	446441	194252	237491	159729	382259	305336	441375	379891	575731	133854	77557.9	81503.4	48934.1	85304.9	63056.7	203668	319765	213641	0.856209	0.526246	0.810805	0.992932	0.303568	0.478209
819.8345++	2	819.835	0	MLOC_7938.1	GGVYGGGSAVGPDYMR	GGVYGGGS[+80]AVGPDYM[+16]R	119.72	AT4G25140.1	OLEO1, OLE1 | oleosin 1 | chr4:12900498-12901259 FORWARD LENGTH=173	107.52	1	1.77011e-11	1.61371e-10	136703	811445	473029	137963	115376	834042	715723	78074.4	148868	393724	2.079e+06	142516	143357	896406	1.77913e+06	28343.4	98297.3	309163	496097	112903	376867	384596	809269	91362.4	0.13704	0.236841	0.869979	0.112733	0.126127	0.228439
1130.5395++	2	1130.54	0	MLOC_11260.1	NASLSGIPSPGVQQPGGNISGSR	NASLSGIPS[+80]PGVQQPGGNISGSR	119.88	AT5G59710.1	VIP2, AtVIP2 | VIRE2 interacting protein 2 | chr5:24058157-24061736 FORWARD LENGTH=614	107.42	1	1.81134e-11	1.63635e-10	36732.6	130922	202985	53885.3	252276	434973	235406	298250	87648.4	118402	125391	88086	34690.7	214581	232566	199523	62751.7	164186	123314	92636	81788.9	98287	285375	234450	0.0328849	0.0608071	0.468584	0.365543	0.201246	0.235058
836.6865+++	3	836.687	0	AK369564	NQFSFEDIDSTANVDEVGSPEK	NQFSFEDIDSTANVDEVGS[+80]PEK	119.68	AT4G39680.2	| SAP domain-containing protein | chr4:18414604-18416938 REVERSE LENGTH=633	107.1	1	1.94984e-11	1.73789e-10	172085	116699	157076	114238	4657.02	89540.8	23689.5	87935.8	66083.5	51826	107392	88322.5	42515.1	60743	44890.1	35501.4	73235.5	111922	97617.9	31935.2	60161.6	58952.6	115034	94844.6	0.813429	0.693	0.584359	0.17403	0.486063	0.233893
1053.4875++++	4	1053.49	0	MLOC_58863.1	HTYILDDPFDDPPQLAEFIPENSPLGKPHDEVAEER	HTYILDDPFDDPPQLAEFIPENS[+80]PLGKPHDEVAEER	119.38	AT1G53720.1	ATCYP59, CYP59 | cyclophilin 59 | chr1:20057012-20059508 FORWARD LENGTH=506	107.1	1	1.94984e-11	1.73402e-10	91684.3	82549.4	85361.5	77164.8	27844.2	103430	153119	94244.9	74711.2	29870.5	94950.3	32997.4	36135.5	46423	195692	68517.7	31682.4	19582.4	30340	92462.7	12186.3	23871.8	67999.1	89021.9	0.465983	0.886113	0.955881	0.318505	0.0969436	0.0114913
995.4563++	2	995.456	0	AK364955	TIDANVSEAEGIYSALEK	TIDANVS[+80]EAEGIYSALEK	119.93	AT5G13420.1	| Aldolase-type TIM barrel family protein | chr5:4302080-4304212 REVERSE LENGTH=438	106.66	1	2.15774e-11	1.8936e-10	46178.2	43099.4	61524.9	31794.6	6506.77	11123.2	26293.2	21080.4	54022.5	14689.4	39562.5	15722.2	22428.7	30902.1	9387.54	20502.5	44671.2	18437.6	50381.4	26314.3	10854.3	10982.7	10585.8	13189.1	0.134656	0.78231	0.0234739	0.626156	0.784667	0.42232
1071.9838++	2	1071.98	0	AK376744	ALPHAHSDPVVNDYASDVR	ALPHAHS[+80]DPVVNDYASDVR	119.71	AT3G46920.1	| Protein kinase superfamily protein with octicosapeptide/Phox/Bem1p domain | chr3:17280430-17284857 REVERSE LENGTH=	105.93	1	2.5527e-11	2.2015e-10	589814	559624	408794	105704	650971	581635	649360	247798	642316	443854	643854	355976	830415	547635	546314	356477	284379	435318	512909	146977	107363	363484	466955	106166	0.847334	0.908352	0.112246	0.901114	0.922388	0.329608
1169.9853++	2	1169.99	0	MLOC_5598.2	AAESDVAPEEVEMPDPVSENK	AAES[+80]DVAPEEVEM[+16]PDPVSENK	119.65	AT1G15340.1	MBD10 | methyl-CPG-binding domain 10 | chr1:5275895-5277474 REVERSE LENGTH=384	105.24	1	2.99226e-11	2.53138e-10	394658	480396	174703	1.06893e+06	24076.7	45152	39935.5	435513	1.25847e+06	1.06004e+06	661849	443178	737648	281105	60757	268668	3.78919e+06	900672	1.70589e+06	1.55629e+06	580779	36383.1	78707.9	508826	0.435028	0.477094	0.536014	0.292749	0.215618	0.867235
1033.8905++	2	1033.89	0	AK364491	GGDGSGGYGGGYGGGGGGGWGGQR	GGDGS[+80]GGYGGGYGGGGGGGWGGQR	119.86	AT4G36020.1	CSDP1 | cold shock domain protein 1 | chr4:17043443-17044342 REVERSE LENGTH=299	105	1	3.16228e-11	2.64716e-10	28558.4	38172.6	28796.3	49262.4	22776.4	69398.5	50493.8	5331.06	127076	124935	43789.6	70815.5	21097.6	45344.1	60484.3	8165.28	216858	75418.8	55246.4	131401	31713.6	14039.3	48680.6	8300.14	0.533697	0.275816	0.568769	0.391748	0.0108019	0.0347763
769.8767++	2	769.877	0	AK363968	VDTSNLGIGSLPSAK	VDTSNLGIGSLPS[+80]AK	119.8	AT3G18290.1	EMB2454, BTS | zinc finger protein-related | chr3:6274308-6280174 FORWARD LENGTH=1254	104.96	1	3.19154e-11	2.66607e-10	15247.9	27023.4	26199.6	29413.7	20333.7	25201.1	77649.6	64940	13510.1	91095.6	39856.3	24882.7	97016.3	33623.3	36331.8	47615.2	18248.8	17167.2	58754.5	45313.5	17851.8	3697.81	42309.8	57636.7	0.332585	0.112847	0.109868	0.470838	0.831096	0.702486
969.9409++	2	969.941	0	MLOC_5950.1	ILPWGEEAYAGGSANAPR	ILPWGEEAYAGGS[+80]ANAPR	119.89	AT2G39050.1	| hydroxyproline-rich glycoprotein family protein | chr2:16303427-16305336 FORWARD LENGTH=317	104.65	1	3.42768e-11	2.83369e-10	180373	82450.9	478557	179629	73764.3	180754	283866	83077.3	156320	227048	419786	263976	251116	162454	354250	90238	429465	292059	611707	221453	65302.5	152803	302648	184394	0.643646	0.0975448	0.745756	0.622185	0.103484	0.884998
910.0589+++	3	910.059	0	MLOC_71314.1	HNVPNDVPDESIEGPSDEEGEALAK	HNVPNDVPDESIEGPS[+80]DEEGEALAK	119.34	AT1G47820.2	| unknown protein; BEST Arabidopsis thaliana protein match is: unknown protein (TAIR:AT1G47813.1); Has 29 Blast hits	104.6	1	3.46737e-11	2.85468e-10	14708.4	21603.3	22863.4	280496	52688	64991.7	116981	188421	46947.3	21132	137765	118018	164873	50285.8	93320.2	96475.2	30499.6	69920.6	38294.8	108751	10277.7	73767.5	17408.6	37105.2	0.738643	0.439563	0.134167	0.807551	0.999426	0.656259
998.7594+++	3	998.759	1	AK373369	RQLSPGFLEDALDEDEETDNQYSSR	RQLS[+80]PGFLEDALDEDEETDNQYSSR	119.94	AT5G61150.1	VIP4 | leo1-like family protein | chr5:24603846-24607528 REVERSE LENGTH=625	103.4	1	4.57088e-11	3.64302e-10	14487	22672.2	74032	72550.4	22912.4	28865.6	46017.1	22004.5	31493.7	12574.1	57019.9	50701.7	18984.2	30338.6	47273.6	55719	376248	274251	50427.3	26316.6	127591	102723	38849	12699.5	0.813105	0.566808	0.523602	0.957065	0.760349	0.55866
856.1552++++	4	856.155	0	MLOC_67581.1	LMPEPTAVALLYAQQQQQLMHDNMGSGIEK	LMPEPTAVALLYAQQQQQLMHDNMGS[+80]GIEK	100.28	AT2G32120.2	HSP70T-2 | heat-shock protein 70T-2 | chr2:13651720-13653411 REVERSE LENGTH=563	103.22	1	4.76431e-11	3.77458e-10	27539.2	63968.4	167141	11104.2	5677.1	268701	165814	446767	105383	160114	36544.1	13890.4	118114	62760	440159	463431	37399.1	31944.7	47772.1	29276.4	41781.1	109049	441163	294519	0.575641	0.615475	0.263392	0.28525	0.0945861	0.0119144
845.8716++	2	845.872	0	AK367504	LGSPEATFPTQYGDK	LGS[+80]PEATFPTQYGDK	112.82	AT1G55170.1	| unknown protein; BEST Arabidopsis thaliana protein match is: unknown protein (TAIR:AT3G14750.1); Has 13439 Blast h	103.09	1	4.90908e-11	3.86626e-10	164602	212116	168380	519300	526681	499250	453154	1.26215e+06	108342	93664.4	235339	332717	320035	560975	626512	651978	161491	155300	247153	297735	126632	206232	755491	1.17144e+06	0.833529	0.0994396	0.0786817	0.582592	0.141822	0.0506594
833.3832++	2	833.383	1	MLOC_14236.4	RSPLADSDGSPSLQR	RS[+80]PLADSDGSPSLQR	110.61	AT3G13570.1	SCL30A, At-SCL30A | SC35-like splicing factor 30A | chr3:4429564-4431602 REVERSE LENGTH=262	103.04	1	4.96592e-11	3.90333e-10	880502	165754	423689	271062	475160	558311	303399	33240.6	645320	760928	346332	1.52447e+06	2.43625e+06	578743	339364	87819.8	1.24166e+06	442677	287142	1.2498e+06	296204	292594	228426	229394	0.152381	0.0851015	0.845227	0.481794	0.374127	0.300475
818.3618++	2	818.362	0	MLOC_37645.1	LQSPGAQQYYGTSR	LQS[+80]PGAQQYYGTSR	117.83	AT3G02830.1	ZFN1 | zinc finger protein 1 | chr3:614075-615916 FORWARD LENGTH=397	102.57	1	5.5335e-11	4.31548e-10	239459	251855	229749	231930	325205	315748	232532	374773	256773	228479	264606	213461	306172	273679	304154	254312	393663	328029	356816	3.64876e+06	64503.3	166960	303631	345502	0.667611	0.847856	0.448741	0.845279	0.636377	0.416431
792.6480++++	4	792.648	2	AK367237	HRSPPRAPSPPPPPPPKPQLDPTPPPPR	HRS[+80]PPRAPS[+80]PPPPPPPKPQLDPTPPPPR	119.68	AT4G13730.1	| Ypt/Rab-GAP domain of gyp1p superfamily protein | chr4:7970299-7974055 FORWARD LENGTH=449	102.09	1	6.18016e-11	4.73654e-10	91270.5	135837	102857	111555	60405.3	116592	77474.4	390765	369090	285666	245899	476955	45221.3	73387.2	138653	229802	60439	156194	117511	69062.5	21631.5	23678.9	155149	38811.4	0.87765	0.88199	0.797238	0.426869	0.0898615	0.225223
714.9967+++	3	714.997	1	AK372699	GHRSWDQFETNAALFGVK	GHRS[+80]WDQFETNAALFGVK	119.39	AT3G14010.4	CID4 | CTC-interacting domain 4 | chr3:4637164-4640324 FORWARD LENGTH=549	101.64	1	6.85488e-11	5.17421e-10	104367	85010.4	104516	30762.5	101508	184478	130198	22613.3	96961.5	84604.5	189911	61809.9	218378	188454	214935	7998.3	43123	47953.2	108747	161147	61314.6	53020	152143	13973.1	0.721446	0.215802	0.950194	0.832737	0.521937	0.141043
981.9075++	2	981.907	0	MLOC_4350.2	DNSFSPAGSVDLASASDSR	DNSFSPAGS[+80]VDLASASDSR	115.68	AT5G51660.1	CPSF160, ATCPSF160 | cleavage and polyadenylation specificity factor 160 | chr5:20980250-20989268 FORWARD LENGTH=1442	101.26	1	7.4817e-11	5.59446e-10	21812.9	21087	32323.9	45860.5	6909.37	20397.6	36128.7	34777.9	14534.7	55793.8	51975.9	60217.6	63561.2	50506	64669.1	42537.3	58609.6	90752.5	39602.4	55006.9	35732.7	16002.7	60686.4	13478.4	0.392288	0.581328	0.262482	0.764607	0.395558	0.79951
703.1189++++	4	703.119	0	MLOC_44066.1	SAIPHGAVGDGIVEKPPVIIDGSPIYK	SAIPHGAVGDGIVEKPPVIIDGS[+80]PIYK	119.89	AT3G46920.1	| Protein kinase superfamily protein with octicosapeptide/Phox/Bem1p domain | chr3:17280430-17284857 REVERSE LENGTH=	100.57	1	8.77001e-11	6.39026e-10	580996	448427	430602	358855	308726	504776	289697	347177	311070	145835	454404	177699	291693	427016	476238	182877	103375	109406	222400	108039	97413.7	156262	487797	306634	0.617347	0.827064	0.510825	0.376206	0.141375	0.619524
660.0026+++	3	660.003	0	AK251924.1	SFIKPKPEEPSAPTLEK	S[+80]FIKPKPEEPSAPTLEK	119.77	AT4G11560.1	| bromo-adjacent homology (BAH) domain-containing protein | chr4:7000095-7003445 REVERSE LENGTH=587	100.12	1	9.72747e-11	6.98593e-10	82670.5	519728	661353	1.13819e+06	150660	329604	655492	1.13119e+06	145205	528377	721792	1.20464e+06	115397	919880	703584	455269	148688	554885	780702	495674	100933	352464	944629	627826	0.00340463	0.000685714	0.0687626	0.167383	0.0191561	0.0939015
1134.8226+++	3	1134.82	0	AK355463	SNGQFTDDPNEYDDNIVEDDVVSPGKPEVK	SNGQFTDDPNEYDDNIVEDDVVS[+80]PGKPEVK	118.95	AT1G26110.2	DCP5 | decapping 5 | chr1:9024616-9027556 REVERSE LENGTH=605	100.12	1	9.72747e-11	6.97339e-10	326802	133992	136247	56617.6	90703.1	163248	91295.4	103104	80263.1	45136.8	97867.9	47814.6	27716.8	89491.5	124275	130502	52414.5	47655.3	69679.2	42832.6	23825.3	33560.8	192205	89448.2	0.487743	0.619921	0.355423	0.348921	0.0952762	0.0933746
754.3509+++	3	754.351	0	AK251236.1	DHTKPVQQVLADMTNGGVDR	DHT[+80]KPVQQVLADMTNGGVDR	119.76	AT1G77120.1	ADH1, ADH, ATADH, ATADH1 | alcohol dehydrogenase 1 | chr1:28975509-28977216 FORWARD LENGTH=379	99.91	1	1.02094e-10	7.24087e-10	61626.2	26235.6	80527.7	13022	19770.6	90944.4	48889.4	71446.7	36360.3	87367.1	31369.5	51761.6	50926.3	60062.7	77094.7	51071.4	41360.9	74236.8	43190.3	12589.4	32194.4	26596.8	76187	110008	0.506085	0.774064	0.264991	0.35148	0.0835062	0.113587
822.3402++	2	822.34	0	AK371508	GNLADSEMSSVGSPGR	GNLADSEMSSVGS[+80]PGR	119.86	AT1G04300.1	| TRAF-like superfamily protein | chr1:1148818-1153895 REVERSE LENGTH=1074	99.06	1	1.24165e-10	8.5629e-10	41445.5	34575.7	50037.3	31514.3	117484	84291.3	84964.2	68687.4	110263	122565	99772.7	78682.8	108610	81577.1	48512.2	61734.3	200160	374665	102910	135573	104825	32896	61880.1	45957.1	0.645296	0.569805	0.565471	0.12357	0.0571109	0.00681267
673.3320+++	3	673.332	2	MLOC_58319.1	RQNLGQSLGDGDISPPRK	RQNLGQSLGDGDIS[+80]PPRK	119.93	AT1G31870.2	| unknown protein; FUNCTIONS IN: molecular_function unknown; INVOLVED IN: biological_process unknown; LOCATED IN: cy	99.02	1	1.25314e-10	8.62723e-10	81291.3	136861	155106	216537	129869	201259	152163	248776	225327	338318	124797	175850	70979.4	90487.9	109768	45005.4	90909.8	220784	239179	121602	58794.1	27251.5	112414	172871	0.274919	0.533279	0.52425	0.755094	0.236034	0.389972
1004.3855++	2	1004.39	0	AK373369	GMESEEDGYEQQAVPSR	GM[+16]ES[+80]EEDGYEQQAVPSR	119.61	AT5G61150.1	VIP4 | leo1-like family protein | chr5:24603846-24607528 REVERSE LENGTH=625	98.61	1	1.37721e-10	9.41643e-10	53452	14511.8	34542.9	137448	19297.3	16848.1	35248.6	119360	37364.6	36950.2	60832.3	118821	38030.6	52523.9	13491.4	44656.5	205703	144241	52184.8	204460	24553.7	19309.8	47098.3	120592	0.650111	0.456233	0.455391	0.875607	0.708498	0.119467
703.8030++	2	703.803	0	MLOC_3114.1	TGYFNGSPLEGGK	TGYFNGS[+80]PLEGGK	111.39	AT3G12960.1	| unknown protein; Has 44 Blast hits to 44 proteins in 14 species: Archae - 0; Bacteria - 0; Metazoa - 0; Fungi - 0;	98.23	1	1.50314e-10	1.00875e-09	2.0121e+06	2.3981e+06	171596	1.61884e+06	2.15196e+06	2.27019e+06	247703	1.2195e+06	1.54972e+06	2.09922e+06	3.09185e+06	1.34272e+06	1.9321e+06	2.02292e+06	416753	139832	244891	64699.2	274705	343493	84503	38221.8	158774	566861	0.798737	0.939895	0.815208	0.958646	0.233146	0.411905
807.3696++	2	807.37	0	MLOC_80158.1	NAVFGDSSALSPGGVR	NAVFGDSSALS[+80]PGGVR	119.1	AT4G13930.1	SHM4 | serine hydroxymethyltransferase 4 | chr4:8048013-8050021 REVERSE LENGTH=471	97.93	1	1.61065e-10	1.06655e-09	89818.6	147401	69197.1	74251.4	88926.8	79879	50039.1	78114.3	82856	55026.1	85630.2	92001.7	72959.3	72248.9	63439.6	65181.4	97347.7	97274.5	160791	105900	54752.1	25857.3	59902.1	74437.4	0.749402	0.647198	0.950178	0.557029	0.30865	0.975652
923.3862++	2	923.386	1	AK362998	RGSVDPSNDYQVEDGK	RGS[+80]VDPSNDYQVEDGK	107.13	AT3G01540.1	DRH1, ATDRH1 | DEAD box RNA helicase 1 | chr3:213077-216142 REVERSE LENGTH=618	97.56	1	1.75388e-10	1.14059e-09	40179.2	13350.1	50407.1	120897	37870.9	54661.7	79294.5	168388	42298.6	29265.7	41349.1	65219.9	16156.8	96478.2	98346.4	84356.4	174795	32763.8	92570.8	22971.4	29871.6	31502.3	84367.7	104539	0.309586	0.657971	0.780803	0.242244	0.00607173	0.0731829
777.0448+++	3	777.045	2	MLOC_58756.5	VRGRSPAFNALAATFENSNAR	VRGRS[+80]PAFNALAATFENSNAR	118.84	AT4G30160.1	VLN4, ATVLN4 | villin 4 | chr4:14754528-14759511 FORWARD LENGTH=974	97.51	1	1.77419e-10	1.15005e-09	92412	90498.5	55918.3	39411.3	25548.3	74398.8	54370.5	36438.2	110912	46427.1	109245	77511.7	144306	84741.8	63597.7	31360.2	75339	54554.3	84551.4	45958.8	144785	26378.1	56263.4	75837.9	0.185817	0.638335	0.0899464	0.42719	0.360314	0.308306
732.3663++	2	732.366	0	MLOC_10924.2	SAPGVVLSQEIQR	S[+80]APGVVLSQEIQR	114.39	AT2G01690.1	| ARM repeat superfamily protein | chr2:309144-313499 REVERSE LENGTH=743	97.45	1	1.79887e-10	1.16416e-09	354981	122895	272076	833536	147602	107198	218786	96189	68817.8	83327.4	165908	143757	120223	135944	144338	70041.2	30889	66974.8	165389	110023	79505.7	37045.3	177293	61481.7	0.618453	0.692055	0.498133	0.572257	0.115086	0.172674
1052.7839++++	4	1052.78	2	MLOC_57175.1	RGGAAKSPAVPVVVPVSPSPEVQPAGGDGAPKPQPEEQQQGK	RGGAAKS[+80]PAVPVVVPVSPSPEVQPAGGDGAPKPQPEEQQQGK	110.34	AT3G45980.1	H2B, HTB9 | Histone superfamily protein | chr3:16897492-16897944 REVERSE LENGTH=150	97.34	1	1.84502e-10	1.19017e-09	241762	171951	12212.4	57902.8	182157	189999	12420.3	83649.3	74731.5	35912.4	76932.2	47733.2	63993.3	160426	34170.7	31510.1	38471.3	55645.6	31997.7	69103.6	13160.4	10777.4	4803.63	23479.6	0.713902	0.355969	0.440359	0.680309	0.305901	0.530541
808.8787++	2	808.879	0	MLOC_58756.5	AASIAAMSASFERPK	AAS[+80]IAAMSASFERPK	115.72	AT4G30160.1	VLN4, ATVLN4 | villin 4 | chr4:14754528-14759511 FORWARD LENGTH=974	96.96	1	2.01372e-10	1.26827e-09	181736	121612	196122	47434.5	337920	251817	299418	72944.8	108551	203178	121718	117833	255179	433568	581779	53977.7	216980	127681	105684	138132	105237	100302	150557	41071.9	0.688444	0.55714	0.205146	0.820983	0.495425	0.1237
954.4724++	2	954.472	0	AK362299	RPGSPDFLQQLTEIAR	RPGS[+80]PDFLQQLTEIAR	95.62	AT1G02080.2	| transcription regulators | chr1:373694-386682 FORWARD LENGTH=2377	96.65	1	2.16272e-10	1.35569e-09	362353	496530	404303	441568	63212.5	494632	294068	365955	264087	357728	437927	250927	268563	291545	378382	199642	120525	152906	198774	101882	82419.6	69871.9	288765	370321	0.528509	0.409719	0.904194	0.367211	0.125842	0.137236
834.0671+++	3	834.067	0	MLOC_17274.2	HRPVPSPPPEPSPNPEAAELSSK	HRPVPS[+80]PPPEPSPNPEAAELSSK	119.11	AT3G15080.1	| Polynucleotidyl transferase, ribonuclease H-like superfamily protein | chr3:5074319-5076327 FORWARD LENGTH=275	96.58	1	2.19786e-10	1.37126e-09	79620.6	47220.3	42464.6	71182.2	169094	148926	33926.3	147356	47055.1	52634.9	33314.5	63273.8	38647.7	43894.8	232221	15848.7	71447	52092.6	186772	37423.8	18203.5	29448.6	58926.9	115218	0.261343	0.712815	0.579637	0.985095	0.701218	0.795056
714.3105++	2	714.311	0	AK357485	YGLGSPGGPGAMGAR	YGLGS[+80]PGGPGAMGAR	119.56	AT1G67325.1	| Ran BP2/NZF zinc finger-like superfamily protein | chr1:25209825-25212412 REVERSE LENGTH=287	96.16	1	2.42103e-10	1.49415e-09	49984.8	58511	114633	28140.3	118808	148853	163154	192415	100660	149052	105822	136518	298352	118588	179734	140310	211596	123419	74748.6	99791.4	86089	96056.5	177293	179888	0.861345	0.694403	0.609589	0.562643	0.939806	0.967478
814.3649++	2	814.365	0	MLOC_11310.6	NLSFGGQGPSSLGGNR	NLS[+80]FGGQGPSSLGGNR	119.56	AT2G28290.1	SYD, CHR3 | P-loop containing nucleoside triphosphate hydrolases superfamily protein | chr2:12056771-12072950 FORWARD	95.88	1	2.58226e-10	1.5766e-09	46843.4	40758.9	82193.6	76217.4	33964.7	46983.1	117490	36766.9	69345.8	55281.5	86282.1	100927	56693.4	72167.5	60172.3	41351.8	71935	133082	101332	96197.7	35847.2	21144.7	76578.1	29596.6	0.691061	0.0701686	0.0814783	0.80595	0.148418	0.517792
791.8485++	2	791.849	0	AK250786.1	SGFDALASDGGPGPVR	S[+80]GFDALASDGGPGPVR	116.96	AT1G51510.1	Y14 | RNA-binding (RRM/RBD/RNP motifs) family protein | chr1:19103072-19104753 REVERSE LENGTH=202	95.66	1	2.71644e-10	1.64844e-09	158743	72426.2	64814.8	38813.5	162563	84880.8	54064.5	19664	72686.9	75639.9	89506.9	65824.2	86335.6	86121.2	59161.7	35996.1	95273	50798.9	80514.7	154910	78417.1	39152.7	84689.5	327279	0.254205	0.370847	0.642475	0.296311	0.268749	0.874292
1209.1665+++	3	1209.17	0	MLOC_12678.2	SDEEGFGGVYGQNDPVLNPGTEMHPNHPEYDK	S[+80]DEEGFGGVYGQNDPVLNPGTEM[+16]HPNHPEYDK	119.86	AT5G66780.1	| unknown protein; Has 1807 Blast hits to 1807 proteins in 277 species: Archae - 0; Bacteria - 0; Metazoa - 736; Fun	95.55	1	2.78612e-10	1.68051e-09	144156	76703.8	204351	239357	43131.8	57502.1	105608	106380	202748	78110.4	119151	266422	110152	35026.7	148736	225132	198845	153353	185542	215750	163026	36008	172746	202712	0.0872534	0.727881	0.0916938	0.219567	0.422615	0.244458
725.7072+++	3	725.707	2	AK371760	VAARTPPRDYAAPLGELAAR	VAART[+80]PPRDYAAPLGELAAR	113.28	AT2G32910.1	| DCD (Development and Cell Death) domain protein | chr2:13959685-13961989 FORWARD LENGTH=691	95.29	1	2.95801e-10	1.76817e-09	469020	297518	299251	485723	540666	481324	299310	379770	209824	316570	449090	457904	714771	437759	366401	193179	78086.8	128354	359649	218979	143894	162720	365289	449243	0.972588	0.441218	0.413142	0.626983	0.545984	0.5677
976.8060+++	3	976.806	0	AK377027	EQILNHGGQVNNSVLGVTCVVASPAER	EQILNHGGQVNNSVLGVTC[+57]VVAS[+80]PAER	119	AT5G22470.1	| NAD+ ADP-ribosyltransferases;NAD+ ADP-ribosyltransferases | chr5:7447045-7450743 FORWARD LENGTH=814	94.94	1	3.20627e-10	1.90232e-09	66240.9	29402.2	31610.9	47949.2	25202.9	64362	36445.7	75076.9	34603.3	17921.7	33768.6	38558.6	11035.5	51304.2	42634.1	19012.6	12236.4	47853.1	36140.1	29721	29632.3	19831.1	39953.7	62337.9	0.76114	0.829213	0.955143	0.247361	0.0949281	0.233265
658.8054++	2	658.805	0	MLOC_44993.1	SAGSYFGVPVPR	S[+80]AGSYFGVPVPR	119.59	AT1G76460.1	| RNA-binding (RRM/RBD/RNP motifs) family protein | chr1:28686932-28688506 REVERSE LENGTH=285	94.86	1	3.26588e-10	1.93195e-09	143721	103993	130282	115330	54352.8	100908	107152	64843.7	176539	290745	141121	304741	207151	117036	94684.5	58165.9	66420.2	83576.6	65414.6	35492.4	131818	6.48993e+06	2.29105e+06	34830.6	0.718267	0.707728	0.815023	0.42676	0.439603	0.223491
935.3756+++	3	935.376	2	MLOC_76316.1	DRGDYYGGSLDRGDYGDYYHHSR	DRGDYYGGS[+80]LDRGDYGDYYHHSR	119.94	AT5G42820.1	ATU2AF35B, U2AF35B | Zinc finger C-x8-C-x5-C-x3-H type family protein | chr5:17170445-17171296 REVERSE LENGTH=283	94.78	1	3.3266e-10	1.96205e-09	29988.8	43917.9	166178	419038	23532.6	58619.5	113979	547405	119625	68875.8	85760.8	534649	169318	148133	75168.4	176654	138240	118723	170822	396327	96495.8	11491.7	59459.3	359500	0.67076	0.37583	0.00733738	0.710745	0.791734	0.147952
783.3651+++	3	783.365	1	MLOC_3114.1	LTVDDELRTGYFNGSPLEGGK	LTVDDELRTGYFNGS[+80]PLEGGK	119.66	AT3G12960.1	| unknown protein; Has 44 Blast hits to 44 proteins in 14 species: Archae - 0; Bacteria - 0; Metazoa - 0; Fungi - 0;	94.6	1	3.46737e-10	2.03009e-09	225351	198238	80335.2	52420.6	236338	61889.7	78738.9	20284.8	22744.6	67126.1	251300	53596.6	120188	104158	110879	5094.06	30283.2	31267.6	100497	47322.4	17281.5	19052.3	110932	36621.8	0.946503	0.591069	0.594018	0.451907	0.740187	0.24549
769.8900++	2	769.89	0	AK252423.1	VLSGVLHSFLSSGR	VLS[+80]GVLHSFLSSGR	102.19	AT5G56290.1	PEX5, ATPEX5 | peroxin 5 | chr5:22786655-22791972 FORWARD LENGTH=728	93.86	1	4.1115e-10	2.34867e-09	37810.8	37582.7	21501.8	1811.05	8968.57	112391	37369.7	18492.1	31853.2	44614.2	19663.6	9893.28	70715.6	49158.9	34852.9	27819.6	14299	12550.8	28226.5	15818.2	24314.4	9234.31	74279.7	5662.82	0.784398	0.584648	0.10395	0.573079	0.573827	0.470417
1094.4192++	2	1094.42	2	AK251612.1	KEEAKEESDDDMGFSLFD	KEEAKEES[+80]DDDM[+16]GFSLFD	119.68	AT5G24510.1	| 60S acidic ribosomal protein family | chr5:8369295-8369866 REVERSE LENGTH=111	93.62	1	4.3451e-10	2.45403e-09	21841.2	22013.4	112444	2.3559e+06	22101.8	63183	47399.4	136307	107313	311473	132223	168358	58007.9	40172.9	61396.9	48204.6	264036	327870	199941	153818	96456.2	83951	65032.8	212022	0.516959	0.841924	0.408979	0.894845	0.970864	0.293773
1009.4197++	2	1009.42	0	AK250745.1	GESGSGVEVSCVYGPNSPR	GESGSGVEVSC[+57]VYGPNS[+80]PR	119.77	AT5G04840.1	| bZIP protein | chr5:1406005-1407648 FORWARD LENGTH=307	93.57	1	4.39542e-10	2.47894e-09	38292.2	33601.5	72327.8	41479.7	36973.3	73212.8	51853.1	33426.2	90036.8	34465.1	43588.9	36720.5	42325.6	34456	50770.7	15550.9	105055	150344	68734.6	82098.8	50308.4	12292.5	33051.8	32686.8	0.916338	0.539651	0.398775	0.876168	0.797616	0.106881
1026.9779++	2	1026.98	0	AK369594	VTPSTSQADGASPAAGITVDK	VTPSTSQADGAS[+80]PAAGITVDK	119.87	AT3G21630.1	CERK1, LYSM RLK1 | chitin elicitor receptor kinase 1 | chr3:7615543-7618530 REVERSE LENGTH=617	93.35	1	4.62381e-10	2.59675e-09	9115.59	11112.8	15492.2	11802.7	13962.9	26946.6	20964.4	6407.91	12146.3	10433.9	13201.6	17804.5	3223.16	3419.31	9949.56	2775.48	13811	27896.1	22001.1	19161.1	9640.84	2940.51	24278.5	15166.8	0.500479	0.1781	0.182919	0.823471	0.174621	0.874977
855.9268++	2	855.927	0	MLOC_63787.3	SAVGTPAYIAPEVLSR	S[+80]AVGTPAYIAPEVLSR	119.74	AT1G10940.1	ASK1, SNRK2-4, SNRK2.4, SRK2A | Protein kinase superfamily protein | chr1:3656050-3658170 REVERSE LENGTH=363	93.14	1	4.85289e-10	2.70259e-09	99091.5	61473	143672	108939	36548.9	76856.5	150821	16629.8	63913	45367.2	75289.6	32770.4	50292.6	79360.8	87586.6	19750.3	38065	24492	59236.1	65979.6	18661.4	31198.1	92928.4	27060.8	0.34267	0.472289	0.942691	0.229248	0.0771829	0.283948
708.8114++	2	708.811	0	AK375506	EAVQVSGEQSFR	EAVQVS[+80]GEQSFR	119.93	AT1G65090.3	| unknown protein; FUNCTIONS IN: molecular_function unknown; INVOLVED IN: biological_process unknown; LOCATED IN: ce	92.9	1	5.12861e-10	2.82463e-09	40393.8	41717.9	35113.6	17660.9	74985.7	53865.4	41515.4	31384.6	47113.6	89290	53046.3	50870.8	54842.3	55410.1	47026.6	43078.1	85813.3	90522.1	62956.8	195223	37268.7	6148.14	40691.5	26799.4	0.507445	0.681178	0.645977	0.442083	0.372593	0.207106
712.3001++	2	712.3	0	MLOC_38385.1	AYFDSADWALGK	AYFDS[+80]ADWALGK	119.76	AT5G64130.1	| cAMP-regulated phosphoprotein 19-related protein | chr5:25664547-25665339 REVERSE LENGTH=115	92.74	1	5.32108e-10	2.91056e-09	641851	902450	402685	360437	418849	623044	381939	256033	368249	506505	1.35089e+06	342398	649043	419687	586561	143134	104807	252808	199068	49240.1	114056	48683.2	298569	228788	0.510006	0.545789	0.559833	0.903347	0.882822	0.364457
913.4576+++	3	913.458	0	AK248356.1	DVHVVEKPDITPMNANVASPAINVK	DVHVVEKPDITPMNANVAS[+80]PAINVK	115.67	AT3G12640.1	| RNA binding (RRM/RBD/RNP motifs) family protein | chr3:4014455-4017675 FORWARD LENGTH=638	92.08	1	6.19441e-10	3.34247e-09	31530.5	21668.3	33956.4	15804.1	55873.4	36210.9	35014	21176	26314.7	30768.9	17917.3	24885.8	30665.5	36916.4	60431.6	50291	25155.5	46982.9	25307	19977.4	38053.4	18078.4	52632.6	14712.7	0.548983	0.737008	0.107682	0.334228	0.513941	0.405326
782.8161++	2	782.816	0	MLOC_7525.4	GGGGFDGMYSPGGGLR	GGGGFDGMYS[+80]PGGGLR	116.66	AT4G09510.1	CINV2 | cytosolic invertase 2 | chr4:6021312-6023310 REVERSE LENGTH=558	92.06	1	6.223e-10	3.35337e-09	15498.5	25595	100649	30929.3	25221.9	30011.5	67532.1	122839	36088.4	164378	68729.6	77563.4	41987.6	45726	147262	138506	209042	161625	72189.8	101337	65192.2	96331.1	125123	115185	0.718623	0.927956	0.818196	0.607462	0.120283	0.00909219
1045.7990+++	3	1045.8	2	AK249875.1	RDSPAPINEEVEMTEADDVDNAAVPDKK	RDS[+80]PAPINEEVEMTEADDVDNAAVPDKK	115.71	AT3G22440.1	| FRIGIDA-like protein | chr3:7959854-7961886 FORWARD LENGTH=532	92.03	1	6.26614e-10	3.37206e-09	57371.5	27257.7	40813.4	11093.2	76729.3	84434.8	38541.3	42377.3	23751.1	35357.6	27075.2	48274.9	39540.6	57503.2	72841.3	49638	41175.8	39834.9	36223.6	27023.5	22066.5	25027.9	64427.1	35004.4	0.589165	0.622468	0.469617	0.712511	0.560541	0.841932
959.7490+++	3	959.749	0	MLOC_18867.1	NASDDEETSPYETPHPNIRPVGESR	NAS[+80]DDEETSPYETPHPNIRPVGESR	119.42	AT3G14590.2	NTMC2TYPE6.2, NTMC2T6.2 | Calcium-dependent lipid-binding (CaLB domain) family protein | chr3:4904448-4907741 REVERSE	91.95	1	6.38263e-10	3.42092e-09	167734	211534	168294	305184	93173.1	142487	224633	299149	226736	32112	155005	181442	92744.1	157696	133576	152440	440106	63989.5	333068	314718	148963	47683.5	173661	287690	0.175668	0.596455	0.912907	0.918946	0.134894	0.117022
757.8662++	2	757.866	0	MLOC_18233.1	AASFNIIPSSTGAAK	AAS[+80]FNIIPSSTGAAK	116.62	AT3G04120.1	GAPC, GAPC-1, GAPC1 | glyceraldehyde-3-phosphate dehydrogenase C subunit 1 | chr3:1081077-1083131 FORWARD LENGTH=338	91.73	1	6.71429e-10	3.56045e-09	328518	425859	808140	1.50948e+06	428351	415742	570938	881972	277622	246569	369859	702933	433907	436218	410078	479979	182387	106617	359931	734767	54069.4	133245	651657	702448	0.97806	0.245945	0.114629	0.894497	0.196699	0.111473
925.7191++++	4	925.719	1	AK374192	APTPRPPPPASLQPDSPGVFFTNAAAAAPLGSAHRR	APTPRPPPPASLQPDS[+80]PGVFFTNAAAAAPLGSAHRR	119.85	AT1G11360.4	| Adenine nucleotide alpha hydrolases-like superfamily protein | chr1:3822171-3822899 REVERSE LENGTH=242	91.63	1	6.87068e-10	3.62413e-09	1.74684e+06	1.38096e+06	846638	266272	1.49222e+06	1.13555e+06	482221	562829	393980	246753	1.46309e+06	607952	1.08241e+06	1.24381e+06	968314	160797	69490.1	42987.8	656529	173389	56036.3	8169.04	55054	140590	0.803214	0.700887	0.540945	0.898042	0.509279	0.319824
1051.1306+++	3	1051.13	2	AK249875.1	RDSPAPINEEVEMTEADDVDNAAVPDKK	RDS[+80]PAPINEEVEM[+16]TEADDVDNAAVPDKK	117.66	AT3G22440.1	| FRIGIDA-like protein | chr3:7959854-7961886 FORWARD LENGTH=532	91.18	1	7.62079e-10	3.95192e-09	21670.2	34860.7	19320.6	31127.4	141394	334116	28795.1	44876.3	7135.9	31871.3	25749.4	20422.2	45288	41996.8	44575.1	25363.1	28812	19889.5	36169.5	32407.2	24757.7	28532.8	51509.5	55133.8	0.305762	0.400054	0.322138	0.605199	0.512811	0.519185
962.9457++	2	962.946	1	MLOC_32718.4	SAFFEQGLNKLSFNDK	SAFFEQGLNKLS[+80]FNDK	119.47	AT3G58600.1	| Adaptin ear-binding coat-associated protein 1 NECAP-1 | chr3:21668746-21670999 REVERSE LENGTH=302	90.78	1	8.35603e-10	4.27217e-09	81906.9	264485	469487	775592	14784.4	325742	338760	120783	115024	692930	558744	766533	115376	264195	359745	63563.2	148517	699648	228745	72022.3	61554	111093	255908	165722	0.0948921	0.0940539	0.21223	0.136514	0.00966748	0.292616
910.9633++	2	910.963	0	MLOC_53885.1	SLVDPLVTLFGSVHEK	SLVDPLVTLFGS[+80]VHEK	119.88	AT4G35300.4	TMT2 | tonoplast monosaccharide transporter2 | chr4:16796432-16799071 REVERSE LENGTH=739	90.33	1	9.2683e-10	4.66687e-09	10391.3	29407	30502.2	21206.8	1.52323e+07	1.79069e+06	749527	3.7515e+06	48174.1	39259.3	46591.9	7350.68	26077.9	1.34682e+06	817028	110606	289706	26676.8	42156.5	43021.8	26907.8	52326.1	671802	835840	0.437266	0.475482	0.40504	0.511719	0.481303	0.566619
1037.4787++	2	1037.48	1	MLOC_58756.5	GRSPAFNALAATFENSNAR	GRS[+80]PAFNALAATFENSNAR	119.8	AT4G30160.1	VLN4, ATVLN4 | villin 4 | chr4:14754528-14759511 FORWARD LENGTH=974	90.28	1	9.37562e-10	4.70904e-09	619673	505518	745753	875261	595487	527943	2.04335e+06	746302	441817	553363	975926	612406	597905	353322	415326	349076	325733	233479	464239	444019	759672	1.26984e+06	3.89459e+06	1.52342e+06	0.825157	0.2171	0.317824	0.83901	0.282385	0.590044
790.8136++	2	790.814	0	MLOC_7525.4	GGGGFDGMYSPGGGLR	GGGGFDGM[+16]YS[+80]PGGGLR	119.1	AT4G09510.1	CINV2 | cytosolic invertase 2 | chr4:6021312-6023310 REVERSE LENGTH=558	90.16	1	9.63829e-10	4.80471e-09	63885.2	167708	392131	483769	235207	102431	275037	416389	75657.2	122104	327302	540262	77075.5	228703	382373	214223	724627	130443	219778	986641	82346.7	49432.4	72575.8	16198.1	0.568522	0.92129	0.252036	0.953646	0.363502	0.575089
816.8762++	2	816.876	0	MLOC_58756.5	AASIAAMSASFERPK	AAS[+80]IAAM[+16]SASFERPK	119.89	AT4G30160.1	VLN4, ATVLN4 | villin 4 | chr4:14754528-14759511 FORWARD LENGTH=974	89.62	1	1.09144e-09	5.38705e-09	162778	129851	130794	113105	235471	128368	165971	43862.8	188553	176929	162982	199345	229105	135902	75694.2	19612.4	477673	1.84304e+06	1.50641e+06	2.52585e+06	111109	498486	106813	696289	0.522181	0.557858	0.489013	0.67579	0.215106	0.810885
755.2818++	2	755.282	0	MLOC_60667.3	DGEGGSGAGMGDYLK	DGEGGS[+80]GAGM[+16]GDYLK	111.78	AT2G03440.1	NRP1, ATNRP1 | nodulin-related protein 1 | chr2:1039409-1039972 REVERSE LENGTH=187	89.4	1	1.14815e-09	5.63909e-09	77005	99964.9	99042.2	34697	17945.3	60959.8	70994.5	38209.9	106874	103485	219865	135066	74778.6	151817	65195.5	23194.9	261628	89349.4	357420	149791	880274	520388	233026	350178	0.468567	0.47323	0.579	0.821653	0.551791	0.594338
1044.3874++	2	1044.39	1	MLOC_17517.1	VEEKEESDDDMGFSLFD	VEEKEES[+80]DDDM[+16]GFSLFD	119.8	AT3G28500.1	| 60S acidic ribosomal protein family | chr3:10682204-10682551 FORWARD LENGTH=115	89.19	1	1.20504e-09	5.88948e-09	7774.89	11172.1	19991.8	37499.5	3506.37	14179	12746.8	21102.5	24137.6	39407.5	33312.6	37387.5	15726.2	24513.2	11842.8	21621.1	65816.8	120000	80907.1	48318.9	65252.6	6956.5	18206.6	23072.4	0.557478	0.663705	0.677985	0.576013	0.540291	0.772865
607.6312+++	3	607.631	1	MLOC_52193.1	ETDALTGEVQLPKSPR	ETDALTGEVQLPKS[+80]PR	113.18	AT1G07645.1	ATDSI-1VOC, DSI-1VOC | dessication-induced 1VOC superfamily protein | chr1:2367612-2368349 REVERSE LENGTH=137	88.83	1	1.30918e-09	6.31348e-09	2.37157e+07	2.76852e+07	788828	2.21587e+06	2.63279e+07	2.91508e+06	700793	6.10393e+06	1.21928e+07	1.87089e+06	2.53271e+06	8.39427e+06	1.40824e+06	3.35059e+06	1.07481e+06	3.95867e+06	139221	916560	1.05598e+06	854447	557054	439703	1.14903e+06	3.76263e+06	0.87769	0.262127	0.372569	0.486393	0.42251	0.627096
1217.5157++	2	1217.52	0	MLOC_39684.1	GQQGHAVDEYGDPVAVHGSMGAR	GQQGHAVDEYGDPVAVHGS[+80]M[+16]GAR	119.33	AT3G50980.1	XERO1 | dehydrin xero 1 | chr3:18942034-18942721 FORWARD LENGTH=128	88.48	1	1.41906e-09	6.79412e-09	77760.8	667704	118188	151653	60272	202830	273069	44736.9	121560	93574.9	651844	117160	62921.5	273622	424524	265208	111707	319487	274439	145130	258059	199710	258181	116452	0.265275	0.263881	0.136423	0.294349	0.107857	0.880754
789.8798++	2	789.88	0	AK369330	GNSVVENGAATPLAAK	GNSVVENGAAT[+80]PLAAK	111.82	AT2G38280.2	FAC1, ATAMPD | AMP deaminase, putative / myoadenylate deaminase, putative | chr2:16033767-16038793 REVERSE LENGTH=839	88.24	1	1.49968e-09	7.09507e-09	175935	255660	87432.7	683893	67058.9	33950.8	178987	100932	72495.9	82788.7	380952	200975	82788	75740.2	143598	127756	60645.8	80016.6	100555	93559.5	63002.6	14121.5	31983	68012.2	0.632216	0.48701	0.35152	0.261079	0.401451	0.266239
771.3607++	2	771.361	0	MLOC_53885.1	GGGQSALGSALGLMSR	GGGQSALGS[+80]ALGLMSR	119.21	AT4G35300.4	TMT2 | tonoplast monosaccharide transporter2 | chr4:16796432-16799071 REVERSE LENGTH=739	87.64	1	1.72187e-09	8.04143e-09	30973.9	108393	31842.9	19958	59015.2	83368.4	48242.5	133950	29051.4	33807.4	14652.2	30536.2	27572.8	33049.5	48669.1	124356	42360.9	32403.1	132655	33579.2	98117.2	21343.6	51509.5	231805	0.44391	0.561073	0.373821	0.614044	0.613859	0.0840033
738.8458++	2	738.846	0	AK251409.1	NASNVSLADAAHVK	NAS[+80]NVSLADAAHVK	119.9	AT4G26270.1	PFK3 | phosphofructokinase 3 | chr4:13301094-13304030 REVERSE LENGTH=489	87.14	1	1.93197e-09	8.91832e-09	558950	736631	1.20216e+06	1.47437e+06	1.16825e+06	1.10052e+06	1.27014e+06	1.00416e+06	448452	982726	1.1248e+06	967854	706981	1.0102e+06	1.23973e+06	495808	371183	634897	1.30144e+06	1.14485e+06	165139	500990	1.84144e+06	643258	0.0686624	0.00210521	0.0431576	0.619164	0.114912	0.923082
954.4523++	2	954.452	0	MLOC_57766.1	QGLDTDVPLSPQWLMK	QGLDTDVPLS[+80]PQWLMK	95.5	AT5G42950.1	| GYF domain-containing protein | chr5:17224436-17231044 FORWARD LENGTH=1714	87.08	1	1.95884e-09	9.02153e-09	16033.7	26257.6	55931.3	31301.8	60636.5	80115.9	30894.7	33834.1	56242.4	46937.9	30690.7	23011.8	77607.6	65389.4	125188	63417	238080	65757.9	44219.5	46253	17585.4	14974	52926.9	45288.6	0.496108	0.475563	0.415513	0.957216	0.634488	0.84398
715.8430++	2	715.843	0	MLOC_57581.1	GSAGPLVSPGPQQR	GSAGPLVS[+80]PGPQQR	118.72	AT3G60240.4	EIF4G, CUM2 | eukaryotic translation initiation factor 4G | chr3:22261842-22268295 FORWARD LENGTH=1727	86.83	1	2.07491e-09	9.45791e-09	38619.6	118890	142462	99370.7	8707.43	116597	264299	156460	55838	122438	233838	101904	93151.9	206265	282424	96358.9	120039	38085.2	125287	76715.1	119572	91297.7	299219	149758	0.600176	0.106102	0.501655	0.275688	0.027005	0.21446
648.0634++++	4	648.063	0	AK367170	LNHANSVNVNDHLDHQGSIIGVR	LNHANS[+80]VNVNDHLDHQGSIIGVR	119.92	AT3G14270.1	FAB1B | phosphatidylinositol-4-phosphate 5-kinase family protein | chr3:4754624-4761185 FORWARD LENGTH=1791	86.73	1	2.12324e-09	9.66718e-09	19732.6	24418	51507.9	44775.9	22482.6	42124	37929.8	10579.1	18042	71258.2	54535.3	52793.4	51068.8	39711.7	33804.8	11150.5	284692	211356	80089.4	744907	24150	104937	56364.2	116995	0.963966	0.66062	0.557496	0.330194	0.445694	0.744379
779.3582++	2	779.358	0	MLOC_53885.1	GGGQSALGSALGLMSR	GGGQS[+80]ALGSALGLM[+16]SR	116.99	AT4G35300.4	TMT2 | tonoplast monosaccharide transporter2 | chr4:16796432-16799071 REVERSE LENGTH=739	86.61	1	2.18273e-09	9.90414e-09	44574.1	52240.8	148728	167341	14150.6	61185.2	134698	51225.9	66708.1	52237.1	81752.6	195336	195290	93134.1	79012.4	89191.3	167350	175141	291409	243259	75526.1	115429	69452.5	66720.8	0.995661	0.344611	0.0884265	0.93547	0.992537	0.680034
872.7743+++	3	872.774	0	AK248370.1	RPAPPSPAGHVFPQAASTVLPDPAR	RPAPPS[+80]PAGHVFPQAASTVLPDPAR	117.41	AT5G15870.1	| glycosyl hydrolase family 81 protein | chr5:5182641-5184878 REVERSE LENGTH=745	86.23	1	2.38232e-09	1.06644e-08	119996	112060	80848.9	21667.4	52682.6	111726	96470	24920.9	107966	53399.6	90808.7	31956.3	69470.9	103111	104184	24648.3	79151.8	67268	95420.9	57102.5	43554.4	44710.7	95409.4	19775.5	0.331418	0.408348	0.0266152	0.297008	0.0328639	0.0538518
816.0440+++	3	816.044	1	MLOC_74793.3	RDLDLPNEGTPAFYTGTEELK	RDLDLPNEGT[+80]PAFYTGTEELK	119.59	-	-	85.85	1	2.60016e-09	1.1536e-08	91616.8	124123	357118	30074.1	59926.5	63622	69982.6	22252.9	186601	74343.8	181571	122164	108410	102638	122135	45593.2	55417.1	68610.6	90511.3	122519	18694.7	90759.2	123845	22041.1	0.656592	0.377014	0.719641	0.497483	0.264317	0.354321
872.7654+++	3	872.765	0	MLOC_17517.1	FAAVPSGGGAIAVGAPAAAAGGAAAPAAESK	FAAVPSGGGAIAVGAPAAAAGGAAAPAAES[+80]K	117.41	AT3G28500.1	| 60S acidic ribosomal protein family | chr3:10682204-10682551 FORWARD LENGTH=115	85.28	1	2.96483e-09	1.2854e-08	31447.5	113700	102291	59391.3	8862.49	39861.6	30063.1	40586	122101	123679	57003.6	68230.6	23521.8	37365.1	40080.8	29002.2	109469	34692.7	80373.7	53226.1	15728.8	24207.2	40139.5	54115.2	0.944531	0.826392	0.440364	0.0702325	0.031182	0.0577183
585.9537+++	3	585.954	1	AK249847.1	HIWPLDSDGPVSPKK	HIWPLDSDGPVS[+80]PKK	110.76	AT1G49520.1	| SWIB complex BAF60b domain-containing protein | chr1:18329736-18331691 FORWARD LENGTH=372	85.23	1	2.99916e-09	1.29607e-08	421179	726540	35538.1	56868.2	756741	41049.9	59596	122149	91706.2	152221	26850.5	165933	54073.7	35200	17190.2	24532.8	69146.3	22688.7	22623.7	42169	26851.6	14917	41483.6	73233.5	0.692514	0.282821	0.472256	0.407169	0.421695	0.482166
597.2959+++	3	597.296	1	MLOC_75016.2	KPTAEAPVDKSPQVDK	KPTAEAPVDKS[+80]PQVDK	101.28	AT2G03150.1	emb1579 | ATP/GTP-binding protein family | chr2:952313-959004 FORWARD LENGTH=1340	85	1	3.16228e-09	1.3592e-08	164903	7591.5	21360.7	23017	20641	34609.8	20610	14198	19529.4	6058.07	6436.14	26493.8	4796.85	17885.4	27327.9	12327.3	31081.4	33901.6	21548.7	79339.7	35428.8	13428.7	9403.84	18494.2	0.359911	0.359175	0.622355	0.887373	0.916172	0.617796
583.8127++	2	583.813	0	AK373093	SVGTLIQLQK	S[+80]VGTLIQLQK	116.17	AT1G07110.1	F2KP, ATF2KP, FKFBP | fructose-2,6-bisphosphatase | chr1:2178363-2183980 REVERSE LENGTH=744	84.24	1	3.76704e-09	1.59172e-08	79961.7	72544.7	158001	67384.8	79718.8	80105.9	79236.6	46441.5	72089.2	129734	109987	101898	286302	74219.9	87111.7	40896.2	127121	141293	165881	219857	76870.7	37678.4	82981	29123.4	0.489513	0.126018	0.534306	0.357882	0.450554	0.25806
710.3314++	2	710.331	0	AK356696	LPTLSDFFGGSAK	LPTLSDFFGGS[+80]AK	98.3	AT2G46140.1	| Late embryogenesis abundant protein | chr2:18959163-18960362 FORWARD LENGTH=166	84.11	1	3.8815e-09	1.63663e-08	24512.3	281317	138796	28999.7	61050	290165	131127	11473.6	203171	204828	294788	44573.8	80247.1	209922	170824	10389.6	271494	312967	135504	166359	107768	139153	108064	11200	0.339315	0.81337	0.386514	0.104399	0.100005	0.0336939
806.6740+++	3	806.674	1	MLOC_6899.3	NFGRFDSFDEADPFGSTGPFK	NFGRFDS[+80]FDEADPFGSTGPFK	119.55	AT1G20760.1	| Calcium-binding EF hand family protein | chr1:7209515-7214773 FORWARD LENGTH=1019	83.9	1	4.0738e-09	1.71228e-08	14137.2	256602	248571	40123.4	9697.59	66708.6	47179.2	11485.6	101931	92685.3	308729	43850.4	25494.2	72956.3	113231	29562.5	103937	84335.1	111204	61533.1	52756.1	54379.8	80615.2	51730.3	0.343266	0.150034	0.49899	0.12312	0.111592	0.931056
809.3493++	2	809.349	0	MLOC_66533.1	GSPCIGAFTIQCAR	GS[+80]PC[+57]IGAFTIQC[+57]AR	118.53	AT5G35330.3	MBD02 | methyl-CPG-binding domain protein 02 | chr5:13523725-13525270 REVERSE LENGTH=272	83.54	1	4.42588e-09	1.84473e-08	62752.3	154212	50730.5	52798.2	11215.5	64739.4	50176.9	44488	100613	570489	355485	53793.8	165631	50785.6	20135.1	29945	1.0473e+06	101965	456757	280368	463880	33113.7	29687.8	69085.4	0.752644	0.768508	0.493869	0.343217	0.308521	0.339847
612.2831+++	3	612.283	1	MLOC_7079.1	RTIQFVDWCPTGFK	RTIQFVDWC[+57]PT[+80]GFK	119.81	AT4G14960.2	TUA6 | Tubulin/FtsZ family protein | chr4:8548769-8550319 REVERSE LENGTH=450	83.49	1	4.47713e-09	1.85834e-08	1.33031e+06	940399	257256	36265.9	612075	899503	198950	56385.9	946962	140293	209073	62821.3	1.27438e+06	868124	288958	85737.9	52496.2	18230.5	63795.7	35323.7	145048	97647.4	71880.5	97809.2	0.452457	0.257802	0.193019	0.903312	0.279252	0.210126
779.3582++	2	779.358	0	MLOC_53885.1	GGGQSALGSALGLMSR	GGGQSALGS[+80]ALGLM[+16]SR	115.88	AT4G35300.4	TMT2 | tonoplast monosaccharide transporter2 | chr4:16796432-16799071 REVERSE LENGTH=739	82.98	1	5.03501e-09	2.04317e-08	37654.3	58394.3	57034.9	757237	35662.1	58129.5	38491.9	152389	79892.4	28432	115416	126690	94326.8	50093.8	43049.6	97008.1	1.94279e+06	187680	106233	119215	70551.7	30523	50945	123765	0.444469	0.444369	0.648072	0.389708	0.322623	0.0906492
982.4237++	2	982.424	1	MLOC_51340.2	AVPRVDSQGQMCGSTFK	AVPRVDS[+80]QGQM[+16]C[+57]GSTFK	110.2	AT5G43830.1	| Aluminium induced protein with YGL and LRDR motifs | chr5:17622593-17624239 REVERSE LENGTH=251	82.75	1	5.30884e-09	2.13047e-08	1.22754e+06	950464	306787	255940	1.1231e+06	692994	546460	309863	377111	587280	1.08006e+06	793653	1.32558e+06	1.38114e+06	809737	88986.1	292384	130003	705007	1.27932e+06	217637	139222	583690	656660	0.854009	0.87282	0.754466	0.780295	0.560979	0.291869
852.4036++	2	852.404	0	MLOC_72762.2	IHSSVDLLGGGDQTPK	IHSSVDLLGGGDQT[+80]PK	119.83	AT3G48050.2	| BAH domain ;TFIIS helical bundle-like domain | chr3:17734270-17739412 REVERSE LENGTH=1613	81.98	1	6.3387e-09	2.48629e-08	49553	176202	224650	195238	180288	200220	387608	43096.3	202483	270803	89833.3	267325	234210	211377	155239	66962.9	92914.7	55019.7	61532.9	180467	88353.5	74637.2	43771	53825.9	0.546602	0.888381	0.156563	0.933493	0.823128	0.120055
938.9097++	2	938.91	0	AK366430	EMPLPVSPGADYMPHR	EMPLPVS[+80]PGADYMPHR	119.89	AT5G64390.3	HEN4 | RNA-binding KH domain-containing protein | chr5:25743442-25747380 FORWARD LENGTH=866	81.91	1	6.44169e-09	2.52173e-08	66390.5	19566.8	43314.7	62546.9	74297.4	239135	86221.2	148874	148124	214808	59240.5	99891	58853.8	139351	97409.9	96390	168691	147862	149364	138665	265912	67531.2	137000	98622.3	0.996361	0.406695	0.525425	0.862676	0.738924	0.814166
791.4076+++	3	791.408	1	MLOC_38276.2	RKPDENGAVAASPAVGAAALGLTR	RKPDENGAVAAS[+80]PAVGAAALGLTR	119.72	AT3G15010.2	| RNA-binding (RRM/RBD/RNP motifs) family protein | chr3:5052844-5054058 FORWARD LENGTH=404	81.34	1	7.34514e-09	2.82827e-08	12664.9	29377.4	9615.14	36371.7	84122.9	73015.2	57009.2	76239.3	12375.5	15909.2	14622.4	30127.6	51893.6	74679	78925.4	41745.2	25727.6	38969.4	16634.4	66004.7	8968.56	29127.8	57504.9	62518.1	0.257621	0.568237	0.149415	0.714495	0.554255	0.670236
643.7455++	2	643.746	0	MLOC_51340.2	VGSAADWSNHY	VGS[+80]AADWSNHY	119.78	AT5G43830.1	| Aluminium induced protein with YGL and LRDR motifs | chr5:17622593-17624239 REVERSE LENGTH=251	81.16	1	7.65597e-09	2.93663e-08	102472	518699	1.08973e+06	640263	129066	458423	99958.8	406092	74212.4	626040	1.11006e+06	757693	175593	692901	1.50502e+06	309044	1.01969e+06	185267	196333	147433	92539.1	29922.7	69094.7	41150.6	0.907141	0.423495	0.769312	0.313205	0.464133	0.396221
611.3153+++	3	611.315	2	MLOC_25886.1	RDQTAVSPLEVPSPKK	RDQTAVSPLEVPS[+80]PKK	119.57	AT3G14890.1	| phosphoesterase | chr3:5008751-5013060 FORWARD LENGTH=694	80.87	1	8.18465e-09	3.1125e-08	668592	535981	535025	717001	459345	469555	534128	813177	128669	1.02387e+06	632464	758518	711956	351772	495359	352473	763624	984270	720828	726619	93575.7	285856	606143	602725	0.284501	0.647484	0.393465	0.805424	0.567959	0.507233
1060.4934++	2	1060.49	0	MLOC_5598.2	SENGLAVESIVPPPASSEEK	S[+80]ENGLAVESIVPPPASSEEK	119.55	AT1G15340.1	MBD10 | methyl-CPG-binding domain 10 | chr1:5275895-5277474 REVERSE LENGTH=384	80.63	1	8.64968e-09	3.25218e-08	24579.9	12693.3	58823.8	192948	9490.86	26111.6	277159	242860	207345	39952.1	32203.7	26282.4	22412.1	32367.1	172779	191165	84885.3	28512.7	34742.1	27529.7	80132.2	29222.4	175864	219536	0.285221	0.362588	0.781959	0.745463	0.0243348	0.00637641
802.3811++	2	802.381	0	AK374423	VEVPASPQPVMPTR	VEVPAS[+80]PQPVM[+16]PTR	119.89	AT2G01710.1	| Chaperone DnaJ-domain superfamily protein | chr2:315836-316771 FORWARD LENGTH=311	80.56	1	8.79023e-09	3.28954e-08	108158	52565.9	59778.9	116774	248764	23846.9	28401.8	75267	119738	47563.2	59219.4	342006	355147	68434.1	28752.8	79870.5	52830.4	59117.2	110132	81394.2	35408	38220.7	62842.9	53697.8	0.192475	0.564888	0.41229	0.215879	0.209066	0.267688
973.4097+++	3	973.41	0	MLOC_52663.4	MPSQNIADESNVSHDSHEETAVEAPK	M[+16]PS[+80]QNIADESNVSHDSHEETAVEAPK	119.86	AT5G22780.1	| Adaptor protein complex AP-2, alpha subunit | chr5:7590100-7597828 REVERSE LENGTH=1013	80.54	1	8.8308e-09	3.29854e-08	203172	79565.4	151391	293842	168929	127949	96600.8	34519.5	118823	158803	224443	343015	45560.9	66830.4	131849	34852.2	671476	341417	335827	53914.7	203919	111079	194672	99684.1	0.540682	0.653907	0.63845	0.541153	0.979359	0.255407
954.9046++	2	954.905	0	AK366430	EMPLPVSPGADYMPHR	EM[+16]PLPVS[+80]PGADYM[+16]PHR	119.77	AT5G64390.3	HEN4 | RNA-binding KH domain-containing protein | chr5:25743442-25747380 FORWARD LENGTH=866	80.26	1	9.4189e-09	3.50183e-08	434884	222002	187801	1.06573e+06	265279	234403	924834	412189	205321	129978	661230	1.133e+06	604336	388020	869692	228846	169751	551314	292347	201884	641403	153208	438106	523587	0.851414	0.553094	0.230424	0.173916	0.305085	0.490383
842.7485+++	3	842.749	0	MLOC_55250.3	HVSSSPASTSAVPEPCLIVPVSPK	HVSSSPASTSAVPEPC[+57]LIVPVS[+80]PK	119.32	AT5G01970.1	| unknown protein; BEST Arabidopsis thaliana protein match is: unknown protein (TAIR:AT1G30050.1); Has 240 Blast hit	80.04	1	9.90832e-09	3.64981e-08	117179	66975.4	106478	152392	109364	98935.5	122069	171740	73419.3	76008.4	86372.3	117616	81687.4	95315.9	95245.2	40704.3	52277.4	28878	76372.2	130306	22430.8	33663	144230	172980	0.395912	0.717187	0.0937775	0.894157	0.1906	0.341529
854.9189++	2	854.919	0	AK366555	AASAPPAALAPDSPPAPK	AASAPPAALAPDS[+80]PPAPK	119.75	AT1G59710.1	| Protein of unknown function (DUF569) | chr1:21938623-21939673 FORWARD LENGTH=300	79.72	1	1.0666e-08	3.90726e-08	83840.2	49824.7	263136	523732	151117	108631	95780.6	507938	54092.2	78832.7	144075	98876.4	175573	111986	236636	74688.8	117157	60173.6	110810	170569	34359	44974.1	169127	510120	0.386365	0.219861	0.308709	0.580737	0.489382	0.248051
899.8934++	2	899.893	0	MLOC_5053.2	GVSPQPATAAGYGGQWTA	GVS[+80]PQPATAAGYGGQWTA	119.66	AT4G10070.1	| KH domain-containing protein | chr4:6295608-6299759 REVERSE LENGTH=725	79.63	1	1.08893e-08	3.9745e-08	561251	445481	480399	272733	450015	518470	386046	276495	290417	115765	266063	175926	224521	448640	522701	210213	130258	31584.1	159804	53273.9	64043.3	165670	574540	469291	0.519474	0.882727	0.373895	0.460046	0.18603	0.631707
955.4584++	2	955.458	0	AK374271	VATPESPAPVAPAANYFK	VAT[+80]PESPAPVAPAANYFK	119.63	AT1G76890.2	GT2, AT-GT2 | Duplicated homeodomain-like superfamily protein | chr1:28873211-28875203 REVERSE LENGTH=575	79.5	1	1.12202e-08	4.08035e-08	46615.1	26053.9	29499.1	38333.5	15981.3	63522.5	32149.2	11022.5	21156.1	18388.5	24533	17065.5	21409.9	37275.3	13702.9	10881.8	25011.2	17725.6	14080.3	25963.1	16709.1	17389.9	34607.2	15661.5	0.346639	0.43427	0.729803	0.253578	0.326163	0.0975687
764.0182+++	3	764.018	0	AK250601.1	SRPSPDYGRPVSPQYGAYGR	SRPSPDYGRPVS[+80]PQYGAYGR	119.85	AT3G61860.1	ATRSP31, RSP31, At-RS31, RS31 | RNA-binding (RRM/RBD/RNP motifs) family protein | chr3:22900311-22902159 REVERSE LENG	79.35	1	1.16145e-08	4.19698e-08	287012	381219	441934	79483.9	876529	785725	417004	83132.4	307981	509933	482110	108266	910292	510193	260088	10573.2	205001	140965	391959	191860	86873.7	224961	510990	95610.8	0.562946	0.0244378	0.055814	0.732891	0.498521	0.17342
794.3837++	2	794.384	0	AK374423	VEVPASPQPVMPTR	VEVPAS[+80]PQPVMPTR	119.55	AT2G01710.1	| Chaperone DnaJ-domain superfamily protein | chr2:315836-316771 FORWARD LENGTH=311	79.18	1	1.20781e-08	4.34095e-08	51145.1	35952.5	91113.8	52512.8	24022.3	58617.9	124788	71588.6	60230.5	56912.4	53592.6	394216	50874.8	39867.2	68112.9	82978.7	86452.8	116024	98022	104813	18213.9	33844.1	57523.9	79373.3	0.901009	0.452829	0.384619	0.373266	0.15204	0.0474443
703.0243+++	3	703.024	1	AK252687.1	ARSLGLGDLDFSAVHEVLK	ARS[+80]LGLGDLDFSAVHEVLK	119.81	AT3G25530.1	GHBDH, ATGHBDH, GLYR1, GR1 | glyoxylate reductase 1 | chr3:9271949-9273514 REVERSE LENGTH=289	77.86	1	1.63682e-08	5.66852e-08	39329.3	30693	32139.8	28943.8	29013.9	52678.6	23061	23860.5	17078.1	20404	39591.3	33113.3	54730.1	26091.9	28955.7	11236.9	25542.5	33422.3	20563.1	15774.9	19381.6	15732.3	38398.3	19384.7	0.917394	0.713009	0.879557	0.862479	0.747016	0.284004
718.3306+++	3	718.331	1	MLOC_39684.1	SAAGAFTGAGGQLQHGTEERK	S[+80]AAGAFTGAGGQLQHGTEERK	119.83	AT3G50980.1	XERO1 | dehydrin xero 1 | chr3:18942034-18942721 FORWARD LENGTH=128	77.46	1	1.79473e-08	6.1251e-08	48405.6	30295.2	99662.6	112503	29212.5	26671.9	276222	10914.2	190571	52295.8	59117.6	114199	76379.6	48433.7	30410.1	10310.7	105646	87220.4	135341	187452	13666.2	14429.5	56225.5	42419.1	0.320591	0.742908	0.663027	0.673738	0.418066	0.454468
1214.0413++++	4	1214.04	0	MLOC_5598.2	ENEKPAESEEVPVEFEMSDPVLEHVEDEKPAEYEVTAVEGEK	ENEKPAES[+80]EEVPVEFEMSDPVLEHVEDEKPAEYEVTAVEGEK	119.9	AT1G15340.1	MBD10 | methyl-CPG-binding domain 10 | chr1:5275895-5277474 REVERSE LENGTH=384	77.41	1	1.81552e-08	6.16442e-08	15734.5	14478.3	67642.4	30111.4	6498.61	36826.7	35357	95008.9	14231.4	8402.32	26788.1	39079.9	14631.6	36844.4	69289	90964.9	16205.4	11513	12272.3	45806.1	10286.1	8123.89	87148.2	22795.9	0.168193	0.34788	0.0376945	0.230488	0.0736425	0.128689
665.6614+++	3	665.661	1	MLOC_60667.3	GRTAEAAADLLHAASLYGK	GRTAEAAADLLHAAS[+80]LYGK	119.66	AT2G03440.1	NRP1, ATNRP1 | nodulin-related protein 1 | chr2:1039409-1039972 REVERSE LENGTH=187	76.66	1	2.15774e-08	7.22202e-08	22143	30853.6	68896.2	32509.2	5470.37	30657.4	67458.7	14443.8	21436.9	37502.2	70753.4	24795	47054.3	34849.4	70435.1	5778.17	52277.4	23056.3	44433.3	47176.5	39416.7	26575.9	37874.4	14752	0.90508	0.112881	0.82752	0.997439	0.188399	0.284597
719.3439+++	3	719.344	0	MLOC_75846.4	TLHGLQAPEPASHTLFNDK	T[+80]LHGLQAPEPASHTLFNDK	113.95	AT4G30190.1	AHA2, PMA2, HA2 | H(+)-ATPase 2 | chr4:14770820-14775920 REVERSE LENGTH=948	76.53	1	2.22331e-08	7.42281e-08	37113.9	101281	43729.6	58588.6	137904	323467	80648.8	50068	118129	51858.3	109975	53637.3	118396	79227.3	94713.3	26606.3	74680.3	47871.7	76731.7	50302.7	46204	63653.9	98570.6	431969	0.761783	0.995838	0.440488	0.600553	0.769398	0.659826
910.9131++	2	910.913	1	MLOC_11751.1	RTVQFVDWCPTGFK	RTVQFVDWC[+57]PT[+80]GFK	119.87	AT5G19780.1	TUA5 | tubulin alpha-5 | chr5:6687212-6688926 FORWARD LENGTH=450	76.5	1	2.23872e-08	7.46801e-08	650772	270251	352475	453233	161456	207625	191182	52000.6	683849	353275	390866	253817	368375	301757	222129	39793.4	209374	215932	164899	225947	177706	114987	275126	100575	0.275684	0.334628	0.351093	0.767195	0.936547	0.130491
724.8371++	2	724.837	1	AK376810	ASDTAAYIKDSVK	ASDTAAYIKDS[+80]VK	109.16	AT3G53040.1	| late embryogenesis abundant protein, putative / LEA protein, putative | chr3:19664797-19666405 REVERSE LENGTH=479	76.03	1	2.49459e-08	8.21858e-08	41244.6	230205	196605	97884.8	35455.4	280289	294152	46420.6	54355.1	287941	478495	147352	143058	362009	454383	14728.1	89549.1	195301	287335	348530	36648.5	170923	255910	29109.5	0.0104448	0.0915939	0.22285	0.0564314	0.033516	0.375595
604.3134++	2	604.313	1	MLOC_5532.1	RLNSVVAGSPK	RLNS[+80]VVAGSPK	104.08	AT3G17900.1	| unknown protein; FUNCTIONS IN: molecular_function unknown; INVOLVED IN: biological_process unknown; LOCATED IN: ce	75.27	1	2.97167e-08	9.59245e-08	7761.21	25508	33975	42557.6	2518.93	6379.18	529351	15752.5	11638.5	8086.72	12835.8	79259	4213.16	20786.1	19201	8309.41	164508	83341.6	50427.3	160752	329805	28787.5	14773.9	87323.3	0.730492	0.638863	0.63425	0.481315	0.733746	0.570842
549.2774++++	4	549.277	1	MLOC_4341.1	RAQSLLAAGAHPTAAADSLHR	RAQS[+80]LLAAGAHPTAAADSLHR	119.72	AT3G18190.1	| TCP-1/cpn60 chaperonin family protein | chr3:6232226-6233836 FORWARD LENGTH=536	75.19	1	3.02691e-08	9.75502e-08	24817.6	29752.2	80656.4	21144.2	25627.2	42594	30481.9	31259.2	27615.7	39331.2	28852.2	52262.6	93098.8	45650.9	26297	10226.7	15383.2	24408.2	72586.9	79581.4	5881.91	4002.02	56560.4	27597.4	0.231661	0.147448	0.24214	0.750549	0.905732	0.566287
747.8510++	2	747.851	1	AK375664	AREGETVVPGGTGGK	AREGETVVPGGT[+80]GGK	100.13	AT2G40170.1	ATEM6, GEA6, EM6 | Stress induced protein | chr2:16779792-16780167 REVERSE LENGTH=92	75.17	1	3.04089e-08	9.79214e-08	84276.3	56872.2	41821.6	65236.8	65709.7	58857.1	54358.5	7933.24	51622.9	51958.2	55598.1	39089.3	27010.3	60005.3	66795.8	13996.2	65324	48190.5	74255.2	2996.27	61745.5	17569.4	34766.1	29627	0.271416	0.51381	0.222091	0.767762	0.976896	0.0900613
773.3327++	2	773.333	0	MLOC_63900.2	QLSLDQFENESR	QLS[+80]LDQFENESR	118.41	AT4G03080.1	BSL1 | BRI1 suppressor 1 (BSU1)-like 1 | chr4:1359935-1365166 REVERSE LENGTH=881	74.49	1	3.55631e-08	1.12612e-07	91311.5	107294	94199.9	61167.6	9346.68	74195.1	50447.4	63245.5	82503.2	115563	94973.4	132239	162039	92678.1	74113.6	57612.2	170321	103271	100105	109686	3.91129e+06	52910.9	40584.3	31678.3	0.850916	0.580533	0.721364	0.419161	0.413752	0.412515
543.9200+++	3	543.92	0	MLOC_13086.1	MVSIHSSQQIFTR	M[+16]VS[+80]IHSSQQIFTR	119.88	AT2G21580.1	| Ribosomal protein S25 family protein | chr2:9236629-9237510 FORWARD LENGTH=108	74.33	1	3.68978e-08	1.16285e-07	72786.2	104496	109607	176709	48052.7	47690.7	131662	100660	215785	305697	93130.1	267981	119321	100024	48024.4	58793.9	95513.4	55729.4	182593	176981	66692.9	8392.63	36452.4	72505.4	0.777907	0.99415	0.237201	0.50094	0.881357	0.979049
655.8123++	2	655.812	0	MLOC_43148.2	GCLSPLLQSQK	GC[+57]LS[+80]PLLQSQK	116.23	AT2G29200.1	APUM1, PUM1 | pumilio 1 | chr2:12549483-12553185 REVERSE LENGTH=968	74.22	1	3.78443e-08	1.18986e-07	86849.1	54844.3	75393.6	71390.4	81840.6	127063	120904	155815	67631.5	110431	75897.3	95773.3	154450	104540	107189	63486.3	79870.6	82597	100822	79864.2	153084	44760.7	114494	165072	0.815754	0.598909	0.673686	0.352601	0.586799	0.969628
688.8503++	2	688.85	0	MLOC_30711.1	AANLSGPLSLPTR	AANLS[+80]GPLSLPTR	117.41	AT4G10730.1	| Protein kinase superfamily protein | chr4:6609793-6614786 REVERSE LENGTH=711	74.13	1	3.86367e-08	1.21191e-07	49028.9	37646.8	74325	68608.2	39179.4	56254.4	49303.8	32648.3	333325	446425	75793.6	172908	81035.5	34011.5	36709.3	28370.8	703866	742605	724819	998012	236827	21576.3	63362.9	47303	0.877302	0.822488	0.893111	0.312122	0.371803	0.303556
791.4104++	2	791.41	1	MLOC_63303.2	DSSAITIEKLSPLK	DSSAITIEKLS[+80]PLK	116.92	AT1G08820.2	VAP27-2 | vamp/synaptobrevin-associated protein 27-2 | chr1:2821810-2824412 REVERSE LENGTH=386	73.91	1	4.06443e-08	1.26692e-07	102725	56741.2	50431.4	43853	49274.1	68860.7	88469.5	34119.8	36987.1	31014	63135.4	47734.8	80503.3	46555.6	49477.5	22800.3	42053.2	26027.7	34119.4	40392.7	22201.8	14385.4	55908.3	24809.1	0.431102	0.666772	0.516166	0.76997	0.548808	0.306497
779.3582++	2	779.358	0	MLOC_53885.1	GGGQSALGSALGLMSR	GGGQSALGSALGLM[+16]S[+80]R	115.87	AT4G35300.4	TMT2 | tonoplast monosaccharide transporter2 | chr4:16796432-16799071 REVERSE LENGTH=739	73.9	1	4.0738e-08	1.26786e-07	125386	122677	153415	232024	54736.3	69067.5	97801.9	145925	113606	111046	178788	250825	199820	82846.9	98917	93556.4	234792	282118	290986	303730	79514	55348.4	134309	174288	0.848408	0.448211	0.0992632	0.450999	0.984545	0.636295
719.2992+++	3	719.299	0	MLOC_61314.1	QFSHGHGQNIDDSGFGSGTK	QFS[+80]HGHGQNIDDSGFGSGTK	114.94	AT2G38670.1	PECT1 | phosphorylethanolamine cytidylyltransferase 1 | chr2:16168979-16171680 FORWARD LENGTH=421	73.74	1	4.22669e-08	1.30628e-07	50007.9	54726.7	61889	99007.5	11522.9	71537.5	33936.3	115833	83020	136178	108466	145598	75517	116833	104917	14362.1	41921	283065	38644.9	228533	11736.8	28989.6	64219.8	60801.7	0.280264	0.669426	0.130414	0.318427	0.324986	0.458662
974.4263++	2	974.426	1	MLOC_51340.2	AVPRVDSQGQMCGSTFK	AVPRVDS[+80]QGQMC[+57]GSTFK	119.85	AT5G43830.1	| Aluminium induced protein with YGL and LRDR motifs | chr5:17622593-17624239 REVERSE LENGTH=251	73.59	1	4.37522e-08	1.34697e-07	167786	748293	557058	307865	531145	439193	478884	122465	218647	457430	825975	388351	573159	485183	638892	39368.9	911773	769938	324003	822892	509595	191411	442334	227616	0.477052	0.660239	0.814978	0.216517	0.803247	0.0193243
568.6170+++	3	568.617	1	MLOC_25886.1	RDQTAVSPLEVPSPK	RDQTAVSPLEVPS[+80]PK	119.73	AT3G14890.1	| phosphoesterase | chr3:5008751-5013060 FORWARD LENGTH=694	73.23	1	4.75335e-08	1.44776e-07	169009	285320	186912	294752	272841	283272	531043	332973	146668	165985	225108	243690	301072	340842	316081	213444	98088.1	412662	204771	123356	75072.4	106207	73842.1	276685	0.180606	0.0645909	0.271353	0.804256	0.588185	0.539168
851.0625+++	3	851.062	1	MLOC_78807.1	TADGATAEPAVDEKPPSPVKSPVK	TADGATAEPAVDEKPPS[+80]PVKS[+80]PVK	119.84	AT1G08130.1	ATLIG1, LIG1 | DNA ligase 1 | chr1:2542913-2547815 REVERSE LENGTH=790	72.71	1	5.35797e-08	1.60981e-07	109337	128455	123591	148062	130900	23349.9	170422	114597	50434.4	133220	91838.8	51301.3	193196	63263.9	109277	12475.5	146906	71095.6	80297.3	22919	45604.6	18544.4	60023.1	55523.3	0.816972	0.916806	0.592777	0.189519	0.863452	0.316628
557.5981+++	3	557.598	1	MLOC_55616.1	RPSPFDASPFRASR	RPSPFDASPFRAS[+80]R	110.07	AT1G03905.1	| P-loop containing nucleoside triphosphate hydrolases superfamily protein | chr1:993478-995594 FORWARD LENGTH=290	72.25	1	5.95662e-08	1.7697e-07	52924.5	161150	98186.4	9943.42	67956.6	198258	13341.8	3120.34	82408.8	271841	293547	89296.3	175327	157503	167638	3313.8	379835	71302.7	219505	32204.2	13791.1	4144.45	8795.54	26511.5	0.977693	0.805173	0.354605	0.681814	0.77138	0.260567
675.7955++	2	675.796	0	MLOC_78759.1	NATPDSHYIPR	NAT[+80]PDSHYIPR	110.3	AT2G29200.1	APUM1, PUM1 | pumilio 1 | chr2:12549483-12553185 REVERSE LENGTH=968	71.99	1	6.32412e-08	1.86639e-07	65392.7	48129.5	28565.4	17711.7	16781.1	66381.4	61014.2	15286.9	67182.1	90385.1	50899.7	41464.4	63530.9	60842.1	45276.2	19653.1	66864.9	68954.9	45314.4	134550	10887.6	17023.9	55077.6	27830.8	0.846834	0.0660289	0.962256	0.494988	0.308415	0.634297
1069.7508++++	4	1069.75	0	MLOC_70432.1	MPQTQVQHTQQSPGFHQPAQASQGVQVSQPQVPQMSPR	MPQTQVQHTQQSPGFHQPAQASQGVQVSQPQVPQM[+16]S[+80]PR	119.06	-	-	71.54	1	7.01455e-08	2.04148e-07	11297.7	12163.6	32082.3	7578.64	13073.4	20677	53431.6	46636.6	23569.1	34739.6	24313.1	24707.4	15072.8	30710.1	94223.6	24600.9	29295.2	33259.4	46707.7	32662.6	18057.8	3898.82	33635.9	45131.3	0.595879	0.221786	0.978841	0.740119	0.128253	0.0842152
1146.5362+++	3	1146.54	0	MLOC_67581.1	LMPEPTAVALLYAQQQQQLMHDNMGSGIEK	LM[+16]PEPTAVALLYAQQQQQLMHDNMGS[+80]GIEK	93.92	AT2G32120.2	HSP70T-2 | heat-shock protein 70T-2 | chr2:13651720-13653411 REVERSE LENGTH=563	70.95	1	8.03526e-08	2.3066e-07	44912.7	66637.9	385485	28029.4	262156	565261	355826	1.08183e+06	60187.8	89078.7	100261	34865.2	144531	319651	758328	702958	71444.6	62619	69786.1	105415	45309	135174	751656	712423	0.304191	0.336886	0.925265	0.307393	0.0851556	0.0394669
568.5857+++	3	568.586	1	AB447466	TRFPYVDAASPEDR	TRFPYVDAAS[+80]PEDR	110.93	AT1G18100.1	E12A11, MFT | PEBP (phosphatidylethanolamine-binding protein) family protein | chr1:6228049-6230110 REVERSE LENGTH=17	70.52	1	8.87156e-08	2.52849e-07	440936	315437	50523.4	484182	324710	303867	97327.1	274797	203933	219930	259263	297179	578555	294350	61224	124197	101319	144639	186436	53832.6	60729.8	35457.6	24199.3	46738.5	0.862116	0.530063	0.864812	0.570626	0.226692	0.40218
666.7972++	2	666.797	0	AK367910	TPNPFYIESGK	T[+80]PNPFYIESGK	115.89	AT3G07790.1	| DGCR14-related | chr3:2487491-2489017 FORWARD LENGTH=508	70.39	1	9.14113e-08	2.59606e-07	145675	109219	83416.3	98375.9	127404	101747	158293	46763.9	156080	160457	139624	93039.7	126248	192257	154596	33410.9	151241	440779	265492	286003	97080.7	32893.8	97074	38674.4	0.492719	0.846475	0.909747	0.88181	0.467018	0.0184731
840.8723++	2	840.872	0	MLOC_64351.2	MSGLLQSFTMTPQK	M[+16]S[+80]GLLQSFTM[+16]TPQK	119.52	AT1G64110.3	| P-loop containing nucleoside triphosphate hydrolases superfamily protein | chr1:23796887-23801255 REVERSE LENGTH=8	70.18	1	9.59401e-08	2.71694e-07	33318.4	36530	68377.4	151652	15347.5	23742.7	11588.1	30539.6	142626	153289	74908.5	61955.5	58060.9	43853.1	61533.6	24289.4	109178	93197.9	173968	339986	111167	92831.7	204836	117358	0.988961	0.834516	0.416525	0.830445	0.675713	0.925887
1151.8678+++	3	1151.87	0	MLOC_67581.1	LMPEPTAVALLYAQQQQQLMHDNMGSGIEK	LMPEPTAVALLYAQQQQQLM[+16]HDNM[+16]GS[+80]GIEK	119.91	AT2G32120.2	HSP70T-2 | heat-shock protein 70T-2 | chr2:13651720-13653411 REVERSE LENGTH=563	69.89	1	1.02565e-07	2.88207e-07	580817	457780	427727	117938	43918	248918	260907	826443	407591	215119	566080	405585	101971	382717	471840	444219	175002	66998.1	122133	109597	63556.3	153249	696702	842066	0.451891	0.934078	0.330584	0.107896	0.0852122	0.0402063
939.8950++	2	939.895	0	AK362649	ASASGAAPDSPVPEPMVEA	ASASGAAPDS[+80]PVPEPM[+16]VEA	119.61	AT1G22920.1	CSN5A, JAB1, AJH1 | COP9 signalosome 5A | chr1:8109882-8111895 REVERSE LENGTH=357	69.64	1	1.08643e-07	3.02306e-07	241419	284170	279147	390949	221758	142952	279879	272702	124020	111090	148682	166692	133654	293388	145290	72906.4	97407.8	80293.5	187750	58789.9	16771.6	48382.7	188278	136736	0.959776	0.449941	0.680505	0.713159	0.342058	0.690338
679.9761+++	3	679.976	1	MLOC_53862.2	RAIHPSLDFDNSTNGASR	RAIHPS[+80]LDFDNSTNGASR	119.71	AT3G04910.1	WNK1, ZIK4, ATWNK1 | with no lysine (K) kinase 1 | chr3:1355084-1358057 FORWARD LENGTH=700	69.53	1	1.11429e-07	3.0877e-07	175029	189373	40819	818146	29275	263739	29101.6	191529	439141	422062	248356	395366	35941.5	238683	225628	119194	37240.4	87871.9	72821.9	50387.1	462217	12038.3	63307.3	325859	0.923927	0.524751	0.476158	0.980628	0.697505	0.836763
835.3879++++	4	835.388	1	MLOC_68317.1	AGSSDDGYLPVTGAGHAVGEGGGHQLPARGTPGGR	AGSSDDGYLPVTGAGHAVGEGGGHQLPARGT[+80]PGGR	119.44	AT5G06760.1	LEA4-5 | Late Embryogenesis Abundant 4-5 | chr5:2089754-2090313 REVERSE LENGTH=158	69.43	1	1.14025e-07	3.14652e-07	262466	524607	305515	49843.3	268853	226129	342849	51927.1	234029	278693	645701	408134	183041	293496	717232	21671.3	315872	196187	456824	293785	141330	194355	542464	131209	0.601522	0.189002	0.869296	0.459671	0.0989094	0.0802334
755.9986+++	3	755.999	0	MLOC_56421.5	VKPFVEYDNEEDAHSPPGR	VKPFVEYDNEEDAHS[+80]PPGR	119.88	AT1G76010.1	| Alba DNA/RNA-binding protein | chr1:28528505-28530488 REVERSE LENGTH=350	69.4	1	1.14815e-07	3.16614e-07	97605.5	81855.3	111469	113968	77964.3	73893.4	58222.8	107067	150231	623865	88024.6	101839	139906	442843	69069.6	52547.2	2.16027e+06	57614.1	109876	215871	45431.8	29607.7	84958.3	82254.2	0.51745	0.411158	0.434785	0.554019	0.614216	0.837056
702.6791+++	3	702.679	2	MLOC_52193.1	ETDALTGEVQLPKSPRER	ETDALTGEVQLPKS[+80]PRER	108.55	AT1G07645.1	ATDSI-1VOC, DSI-1VOC | dessication-induced 1VOC superfamily protein | chr1:2367612-2368349 REVERSE LENGTH=137	68.66	1	1.36144e-07	3.70317e-07	170064	473868	44266.4	95586	135007	69584.5	75914	29258.1	33102.4	153168	259921	141250	390211	226089	59489	16762.1	89984.2	133224	193119	87343.4	47084.4	18235.4	38911.1	70548	0.315648	0.431684	0.832772	0.526026	0.328286	0.282146
588.2599++	2	588.26	0	AK374547	AISMAVASSSR	AIS[+80]M[+16]AVASSSR	103.3	-	-	68.66	1	1.36144e-07	3.70065e-07	39148	9214.97	15152.9	27998.9	1879.67	20960.2	15796.3	5630.68	66189.1	38218.5	66077	6898.21	12497	31605.4	8682.12	10768.8	236181	259797	66038.4	44125.5	91046.8	21418.8	9586.33	12462.3	0.916498	0.417918	0.297058	0.746979	0.487881	0.460929
846.3471++	2	846.347	0	MLOC_6280.1	ELFMSLDEQGDSPK	ELFM[+16]SLDEQGDS[+80]PK	115.81	AT4G28200.1	| FUNCTIONS IN: molecular_function unknown; INVOLVED IN: RNA processing; LOCATED IN: intracellular; EXPRESSED IN: 22	68.47	1	1.42233e-07	3.8452e-07	197986	83930	67041.2	99148.9	123659	71105.4	42804.3	60410.2	103430	95524.3	103877	142008	120438	55194.1	44564.6	52573.4	156609	570701	152437	177986	58500.7	21746.7	88866.5	180091	0.610214	0.310592	0.74004	0.138843	0.203831	0.951675
838.4188++	2	838.419	1	MLOC_25886.1	DQTAVSPLEVPSPKK	DQTAVSPLEVPS[+80]PKK	119.35	AT3G14890.1	| phosphoesterase | chr3:5008751-5013060 FORWARD LENGTH=694	68.36	1	1.45881e-07	3.91995e-07	36287.9	6567.51	82974.8	62037.2	64382.2	65849	67202.6	59235.2	17291.5	12999.8	81508.8	26093	80509.4	68931.8	113583	103071	26155.6	34206.4	29107.6	26854.7	22580.6	35798.9	62789.9	36566	0.450162	0.17735	0.463382	0.962401	0.362983	0.714821
946.9072++	2	946.907	0	AK366430	EMPLPVSPGADYMPHR	EM[+16]PLPVS[+80]PGADYMPHR	119.68	AT5G64390.3	HEN4 | RNA-binding KH domain-containing protein | chr5:25743442-25747380 FORWARD LENGTH=866	67.7	1	1.69824e-07	4.48781e-07	74186.8	32674	93483	59054.3	96347.6	107742	35913.1	128794	61025.9	62412.6	24413	120914	112189	143029	111411	48675.2	163804	130366	78026.4	177736	68399.6	154241	114995	96090.3	0.611111	0.437619	0.705732	0.109981	0.88116	0.96884
668.2498++	2	668.25	0	AK364468	DSFMEVDSPGR	DSFM[+16]EVDS[+80]PGR	112.45	AT1G56440.1	TPR5 | Tetratricopeptide repeat (TPR)-like superfamily protein | chr1:21138765-21141482 REVERSE LENGTH=476	67.29	1	1.86638e-07	4.88365e-07	116941	132961	107918	21429.5	229663	100599	34984.6	68819.8	142385	96796.9	124474	120017	88133.7	39822.3	27511.8	57992.3	31853	112203	49205.4	221058	1.39002e+06	17482.4	60660.9	100369	0.67662	0.942069	0.744806	0.337589	0.328819	0.354201
710.8419++++	4	710.842	0	MLOC_74717.1	APHPSPPVPHAPLGYGHSPQFPYPGR	APHPS[+80]PPVPHAPLGYGHSPQFPYPGR	116.46	AT4G24690.1	| ubiquitin-associated (UBA)/TS-N domain-containing protein / octicosapeptide/Phox/Bemp1 (PB1) domain-containing pro	66.86	1	2.06063e-07	5.33945e-07	79045.1	75147.2	667109	249481	652010	796480	851901	764024	350331	555557	794685	32064.3	1.05132e+06	585945	866970	344370	69497.3	277460	46790	332757	359850	537840	838618	632945	0.473645	0.308562	0.784144	0.845612	0.497713	0.679849
811.0516+++	3	811.052	1	MLOC_70787.2	IISPQRHDAFASGEATPDPSVR	IIS[+80]PQRHDAFASGEATPDPSVR	119.9	AT5G64270.1	| splicing factor, putative | chr5:25706909-25710718 FORWARD LENGTH=1269	66.59	1	2.1928e-07	5.64167e-07	34158.9	51130.8	48617.1	29949.6	22539.8	57060.7	70007.6	35733.8	58284.7	135362	50918.9	98245.5	58767.4	44743.1	80326.4	28272.8	38331.8	251563	86177.4	37738.5	13089.6	21408.1	39628.6	52579	0.222485	0.289079	0.658832	0.61958	0.183913	0.683366
585.6052+++	3	585.605	1	AK375601	SSWAFLNEPRSPQR	SSWAFLNEPRS[+80]PQR	117.45	AT1G19530.1	| unknown protein; FUNCTIONS IN: molecular_function unknown; INVOLVED IN: N-terminal protein myristoylation, anaerob	66.54	1	2.2182e-07	5.69599e-07	352633	391895	446409	336926	267490	388360	218141	303227	401605	546623	370858	381384	240285	298988	350324	213128	223676	591674	441149	252341	170950	226090	447906	366490	0.106189	0.250448	0.972704	0.250204	0.260833	0.28918
839.8704++	2	839.87	0	MLOC_7079.1	TIQFVDWCPTGFK	TIQFVDWC[+57]PT[+80]GFK	119.63	AT4G14960.2	TUA6 | Tubulin/FtsZ family protein | chr4:8548769-8550319 REVERSE LENGTH=450	66.1	1	2.45471e-07	6.25105e-07	223866	226949	444101	36153.3	192956	409926	505076	14772.5	287860	131517	320578	49422.6	870943	372623	214337	28430.6	216610	120443	708160	116950	122292	86325.6	155136	34152	0.1336	0.16695	0.0138552	0.723171	0.730051	0.261637
665.3500++	2	665.35	0	MLOC_63303.2	ISAVPNIPSPVR	ISAVPNIPS[+80]PVR	113.51	AT1G08820.2	VAP27-2 | vamp/synaptobrevin-associated protein 27-2 | chr1:2821810-2824412 REVERSE LENGTH=386	65.53	1	2.79898e-07	7.02031e-07	76106.3	55393.1	323473	126637	42775.5	26684.2	66789.8	74374.5	87178.8	59381.4	57145.7	54110.1	509210	63971.4	54256.2	79006.5	104709	146708	80494.7	277953	219352	30583.8	54804.8	64938.5	0.950448	0.530312	0.439775	0.253257	0.281901	0.30813
631.6072+++	3	631.607	0	AK366430	EMPLPVSPGADYMPHR	EMPLPVS[+80]PGADYM[+16]PHR	113.14	AT5G64390.3	HEN4 | RNA-binding KH domain-containing protein | chr5:25743442-25747380 FORWARD LENGTH=866	65.51	1	2.8119e-07	7.03945e-07	64012.6	14815.9	179695	37479.2	106385	111264	91682.8	201873	112065	254233	109954	143101	203898	143271	110432	95244	544730	189486	146492	231981	141414	115360	140003	154016	0.656036	0.60097	0.59261	0.462387	0.369533	0.996712
796.8933++	2	796.893	0	MLOC_63068.1	SVMFVLSKPDVFK	S[+80]VM[+16]FVLSKPDVFK	119.7	AT3G12390.1	| Nascent polypeptide-associated complex (NAC), alpha subunit family protein | chr3:3942344-3943595 FORWARD LENGTH=2	64.65	1	3.42768e-07	8.4226e-07	104106	45952.5	41522.4	81479.5	57271.6	57015.2	67979.4	52031	28768.3	24098.7	53037.7	54975.9	88170.1	64560.9	59331.5	31600.3	63222.9	28703.5	66545.9	76525.8	47981.5	29048.2	56761.2	69582.6	0.290174	0.661725	0.831254	0.444758	0.827857	0.472939
962.4497++	2	962.45	0	MLOC_57766.1	QGLDTDVPLSPQWLMK	QGLDTDVPLS[+80]PQWLM[+16]K	119.8	AT5G42950.1	| GYF domain-containing protein | chr5:17224436-17231044 FORWARD LENGTH=1714	64.6	1	3.46737e-07	8.50442e-07	53832.5	127822	670710	21442.2	40340.9	47409	7084.97	78515.9	56015.5	36330.8	71815.2	35394.4	73308	94601.1	19379.4	43007.1	798569	78285.4	32801.3	683734	9472.25	12368.3	26718.2	37398.2	0.467155	0.899329	0.876314	0.752256	0.350541	0.63234
996.3881++	2	996.388	0	AK373369	GMESEEDGYEQQAVPSR	GMES[+80]EEDGYEQQAVPSR	119.88	AT5G61150.1	VIP4 | leo1-like family protein | chr5:24603846-24607528 REVERSE LENGTH=625	63.78	1	4.18794e-07	1.00375e-06	13396.8	10329.8	44855.2	15179.3	10383.1	33254.8	26521.8	33487	236129	64729	60282.2	89416.8	37406	24465.2	33974	23719.1	270818	111659	71168.9	78206.4	43696	8749.51	13140	28410.5	0.324336	0.292543	0.311888	0.551899	0.651415	0.870613
580.2625++	2	580.262	0	AK374547	AISMAVASSSR	AIS[+80]MAVASSSR	119.81	-	-	63.67	1	4.29536e-07	1.02764e-06	27937.6	20810.7	22142	21948.5	112386	52423.9	25541.4	113695	29577.1	35984.4	16729.7	74383.6	49960.6	46483.6	122147	9948.03	88837.5	28240.5	27014.1	96195.5	211160	21893.9	63332.8	34327	0.423905	0.316432	0.640928	0.220396	0.395095	0.292579
742.6385+++	3	742.639	2	MLOC_60125.2	KEEEKEESEDDLGFSLFD	KEEEKEES[+80]EDDLGFSLFD	119.7	AT4G25890.1	| 60S acidic ribosomal protein family | chr4:13159627-13160393 REVERSE LENGTH=119	63.62	1	4.3451e-07	1.03892e-06	10328.9	13261.2	62079.8	120195	10413	45043.2	30875.3	291667	24625.1	41107.4	72674.4	91698	32701.6	29791.9	62919.9	111517	64222.9	22351.3	45126.4	21815.3	45417.3	47130.4	36300.6	105961	0.719091	0.273752	0.271668	0.407497	0.402268	0.151567
603.3083+++	3	603.308	1	MLOC_73301.3	IAVGSHREVYEVGALK	IAVGS[+80]HREVYEVGALK	119.63	AT2G36830.1	GAMMA-TIP, TIP1;1, GAMMA-TIP1 | gamma tonoplast intrinsic protein | chr2:15445490-15446336 FORWARD LENGTH=251	63.43	1	4.53942e-07	1.08021e-06	27345.9	42561.2	76754.6	61055.9	16868.1	41521.4	90015	111724	53606.9	152277	146960	78894.2	73784.1	76050.1	164733	21960.9	93376.3	96550.9	170945	33408.2	46876.3	31198.6	79020.5	94063.2	0.369432	0.120726	0.989797	0.871619	0.129807	0.416658
607.0043++++	4	607.004	2	MLOC_60667.3	HQPGGHGGSGGRYEEEDEYRK	HQPGGHGGS[+80]GGRYEEEDEYRK	100.99	AT2G03440.1	NRP1, ATNRP1 | nodulin-related protein 1 | chr2:1039409-1039972 REVERSE LENGTH=187	62.96	1	5.05825e-07	1.18391e-06	190253	6752.99	7002.07	10851.9	110517	7953.33	18697.6	2472.96	7794.22	19950.4	10557.6	14956.6	1740.45	10635.6	6476.35	3925.63	21912.5	19912.8	14094.4	49623.2	23065.6	12885.9	12028	6359.25	0.429199	0.396517	0.505549	0.407846	0.431478	0.344676
679.8086++	2	679.809	0	AK373470	SLENLFGSGGAAR	SLENLFGS[+80]GGAAR	119.83	AT4G10840.1	| Tetratricopeptide repeat (TPR)-like superfamily protein | chr4:6656614-6659033 FORWARD LENGTH=609	62.13	1	6.1235e-07	1.40041e-06	55427.2	45972.6	58454.6	56223.8	69931.5	45817.1	40840.5	20844.7	101060	74354.1	107361	99044	110541	66442.2	158917	18288.6	115267	83672	116069	312358	25086.6	44500.5	47588.3	43781.5	0.367106	0.902819	0.505934	0.591242	0.77975	0.25618
501.7364++	2	501.736	0	AK366147	ALTAAGSFGK	ALTAAGS[+80]FGK	119.57	AT2G47970.1	| Nuclear pore localisation protein NPL4 | chr2:19629525-19630973 FORWARD LENGTH=413	61.63	1	6.87068e-07	1.55349e-06	48449.2	90197.3	168375	130910	75820.8	169142	149613	63989.2	64638.7	183749	163043	222136	252753	179817	183132	23223.2	144930	392926	177800	147887	74416.8	132960	193399	22387.4	0.28538	0.108826	0.14223	0.707791	0.56841	0.248906
1223.2716+++	3	1223.27	0	MLOC_57175.1	SPAVPVVVPVSPSPEVQPAGGDGAPKPQPEEQQQGK	S[+80]PAVPVVVPVSPSPEVQPAGGDGAPKPQPEEQQQGK	117.37	AT3G45980.1	H2B, HTB9 | Histone superfamily protein | chr3:16897492-16897944 REVERSE LENGTH=150	61.47	1	7.12853e-07	1.60724e-06	280392	132214	151014	78528.8	710609	133058	388931	566907	227623	54394.9	70397.2	208833	26319	491201	562563	335553	74781.3	95703.9	56910	54452.8	89575.3	45923.8	102347	42793.3	0.266472	0.275598	0.379415	0.852495	0.786734	0.891071
1029.4003++	2	1029.4	1	MLOC_72338.1	VVEKEESDDDMGFSLFD	VVEKEES[+80]DDDM[+16]GFSLFD	119.8	AT3G44590.1	| 60S acidic ribosomal protein family | chr3:16163983-16164658 FORWARD LENGTH=111	61.42	1	7.21107e-07	1.62402e-06	11490.9	21080.3	17023.1	31875	13038	16378.9	8458.24	33646.6	14811	60411.8	56269.2	64335.3	45654.9	32688.4	14755.8	34480	129403	205255	80074.1	161669	626925	54781.3	20060.9	53621.7	0.566923	0.987154	0.579504	0.433995	0.395361	0.445615
769.3665++	2	769.367	0	MLOC_9078.1	SINLTQEESPALR	S[+80]INLTQEESPALR	119.89	AT5G15790.2	| RING/U-box superfamily protein | chr5:5149800-5150964 FORWARD LENGTH=232	59.49	1	1.1246e-06	2.43522e-06	136362	94338.2	19349.4	117963	21419	26809.2	67041.4	18584	71579.2	89197.6	32775.9	91569.6	162453	26084.6	65389.2	24091.7	28360	46194.1	98709.3	32117.6	46056.2	39560.1	20833.4	38651.5	0.955662	0.526081	0.967544	0.404475	0.63471	0.376336
672.2434++	2	672.243	0	AK248403.1	AMFYNDMSPR	AM[+16]FYNDM[+16]S[+80]PR	108.41	AT2G01190.1	| Octicosapeptide/Phox/Bem1p family protein | chr2:115023-117296 FORWARD LENGTH=720	58.41	1	1.44212e-06	3.04193e-06	301185	418994	187862	268273	287557	179554	81589.7	256164	310625	392877	377447	303787	425054	320699	226860	67299.4	165530	156841	216572	171907	121428	99348	212190	147356	0.552514	0.985233	0.867417	0.525355	0.369553	0.326347
664.2460++	2	664.246	0	AK248403.1	AMFYNDMSPR	AM[+16]FYNDMS[+80]PR	119.85	AT2G01190.1	| Octicosapeptide/Phox/Bem1p family protein | chr2:115023-117296 FORWARD LENGTH=720	56.53	1	2.22331e-06	4.46114e-06	56745.6	69169.6	130005	17947.9	183487	156647	80704.2	166399	73158.7	193760	121241	106523	192345	69330.4	186260	38730	324826	117071	55207.6	56516.5	112422	115662	176400	48467.6	0.81589	0.637692	0.419329	0.264718	0.74583	0.203085
555.2312++	2	555.231	0	AK373849	AASVYFDEK	AAS[+80]VYFDEK	119.81	AT2G36640.1	ATECP63, ECP63 | embryonic cell protein 63 | chr2:15357019-15358552 REVERSE LENGTH=448	55.72	1	2.67917e-06	5.25955e-06	30831.1	51747.4	77965.4	61784.8	29606.9	92750	56514.5	55399	153590	119922	100336	95441.4	240308	167160	104055	26878.8	213947	215960	142333	71274.4	206400	101986	40326.6	62562.5	0.963431	0.694384	0.410047	0.637745	0.309812	0.237161
667.8632++	2	667.863	1	MLOC_54389.1	KASIVPVLTGNR	KAS[+80]IVPVLTGNR	119.89	AT3G63400.2	| Cyclophilin-like peptidyl-prolyl cis-trans isomerase family protein | chr3:23412449-23415435 FORWARD LENGTH=387	52.97	1	5.04661e-06	9.32059e-06	14991.4	5362.81	51536.7	115108	7515.98	18182.2	150702	93610.2	15554.7	15649.4	44603.7	127009	92099.7	40480.7	97406.9	73183.9	24114.6	136551	127981	171490	24655.7	53929.4	41311.6	66533	0.501898	0.170321	0.0205232	0.901607	0.269965	0.311436
1064.4872+++	3	1064.49	0	AK358522	GLGANLFDRPQPNSPTVYDWLYSDETR	GLGANLFDRPQPNS[+80]PTVYDWLYSDETR	102.27	AT2G33830.1	| Dormancy/auxin associated family protein | chr2:14309768-14310286 REVERSE LENGTH=106	185.86	0.9999	2.59418e-19	5.75475e-17	89270.5	188458	473725	3622.95	7899.53	228023	473262	33929.7	89394.2	29584.3	337879	7850.12	29959.1	421283	796812	16709	58460.5	41854.6	91851.8	5892.22	26252.1	60260.8	1.05338e+06	46583.8	0.897449	0.186381	0.0194314	0.175792	0.0463186	0.390397
1086.7913+++	3	1086.79	0	AK370207	FLHASTDSEEGANSPTEATTPNQESTEEAK	FLHASTDSEEGANS[+80]PTEATTPNQESTEEAK	119.96	AT5G64130.1	| cAMP-regulated phosphoprotein 19-related protein | chr5:25664547-25665339 REVERSE LENGTH=115	171.58	0.9999	6.95024e-18	8.95236e-16	683586	583126	620047	650506	1.21992e+06	848712	372419	554563	409128	134440	363579	148783	276025	674253	499177	477350	116258	103690	263711	203589	46097.9	249496	750468	834351	0.606662	0.95188	0.78305	0.865723	0.949891	0.800398
887.4115+++	3	887.411	0	MLOC_22578.1	HSSSTEPPSPPTSSLQSLSISSNPR	HSSSTEPPS[+80]PPTSSLQSLSISSNPR	115.88	AT2G38430.1	| unknown protein; BEST Arabidopsis thaliana protein match is: unknown protein (TAIR:AT3G54310.1); Has 35333 Blast h	159.4	0.9999	1.14815e-16	8.8165e-15	567871	165782	264130	39254.7	487633	426264	342976	154736	117814	53477.4	267191	25195.8	356041	268758	171373	110733	53844.9	42799.3	100220	51301.5	25182.3	67446.8	343704	20910.8	0.439893	0.852675	0.327749	0.850157	0.982916	0.307672
934.4253++	2	934.425	0	MLOC_44102.4	DVSSLGSASPLQEQNQK	DVSSLGSAS[+80]PLQEQNQK	119.71	AT5G15680.1	| ARM repeat superfamily protein | chr5:5101188-5110793 REVERSE LENGTH=2153	142.99	0.9999	5.02343e-15	1.85727e-13	71549.8	120292	135649	118706	149914	194757	92267.4	134649	220287	146716	113250	79057	339457	148161	186239	63483	71314.7	88569.9	178795	179238	184681	64224.2	262765	131600	0.965944	0.725143	0.941104	0.291414	0.602649	0.208744
896.9275++	2	896.927	0	MLOC_54389.1	ATSQISAEDHTAVAALK	ATSQIS[+80]AEDHTAVAALK	119.59	AT3G63400.2	| Cyclophilin-like peptidyl-prolyl cis-trans isomerase family protein | chr3:23412449-23415435 FORWARD LENGTH=387	130.85	0.9999	8.22243e-14	1.72801e-12	50735.6	62702.5	48418.3	293126	187176	51694.7	111431	269821	38524	510789	325204	297722	779175	49979	154488	166567	28372	265002	85066	278097	198051	9191.31	33011.2	330934	0.205157	0.321529	9.4289e-05	0.21511	0.283752	0.578472
981.6530++++	4	981.653	1	MLOC_53885.1	ADWDAESHRDDEDYASDHGADDIEDNLNSPLISR	ADWDAESHRDDEDYASDHGADDIEDNLNS[+80]PLISR	117.37	AT4G35300.4	TMT2 | tonoplast monosaccharide transporter2 | chr4:16796432-16799071 REVERSE LENGTH=739	130.74	0.9999	8.43335e-14	1.76306e-12	292421	121644	106124	24648.6	7839.68	62706.1	39363.9	5551.5	168588	75639.9	91032.4	72609.7	119983	49082.7	96002.8	32313	57224.9	680037	686949	73342.6	76042.3	20114.4	81086.8	26798.2	0.619628	0.616382	0.238814	0.563473	0.916342	0.301661
945.1048+++	3	945.105	0	AK365203	SAQQHTNQSPEQQLASLSLNDGLISS	SAQQHTNQS[+80]PEQQLASLSLNDGLISS	119.94	AT1G49760.2	PAB8 | poly(A) binding protein 8 | chr1:18416740-18419753 FORWARD LENGTH=671	129.43	0.9999	1.14025e-13	2.27651e-12	247438	211102	176645	124686	204547	206138	134219	238659	89502.1	57681.5	204508	66196.8	62822.9	129632	160972	136101	25797.4	15133.6	55851.5	33184.8	18821.7	46589.2	167672	234831	0.786583	0.777593	0.582348	0.688479	0.40981	0.19743
1108.4699++	2	1108.47	0	AK361294	DSSANQPASPGTTFGPAGQMSK	DSSANQPAS[+80]PGTTFGPAGQMSK	119.11	AT2G47850.3	| Zinc finger C-x8-C-x5-C-x3-H type family protein | chr2:19595953-19598119 FORWARD LENGTH=468	127.6	0.9999	1.7378e-13	3.13984e-12	215710	198005	282452	35557.2	380635	582195	321017	413291	269803	289331	138478	182406	160400	277474	591763	340673	162686	190980	116976	90123.1	129793	14214	453768	418796	0.835169	0.58605	0.121248	0.745856	0.128186	0.181118
1116.4674++	2	1116.47	0	AK361294	DSSANQPASPGTTFGPAGQMSK	DSSANQPAS[+80]PGTTFGPAGQM[+16]SK	119.94	AT2G47850.3	| Zinc finger C-x8-C-x5-C-x3-H type family protein | chr2:19595953-19598119 FORWARD LENGTH=468	125.48	0.9999	2.83139e-13	4.85225e-12	352143	555715	380476	720594	286420	362973	317005	679099	375877	309091	412489	485646	298217	223704	397947	214269	575112	317642	460606	252221	90742.9	108385	550816	737815	0.732848	0.844966	0.756716	0.951681	0.132907	0.21662
780.0394+++	3	780.039	0	MLOC_2643.1	DMPEADIVVLPAGSPVTLDFR	DM[+16]PEADIVVLPAGS[+80]PVTLDFR	119.84	AT2G38870.1	| Serine protease inhibitor, potato inhibitor I-type family protein | chr2:16236546-16237050 REVERSE LENGTH=70	125.39	0.9999	2.89068e-13	4.93269e-12	913440	744476	444869	179705	241493	566147	208610	366055	322192	68441.3	231961	80607	647839	283089	318130	310149	91003.5	52602.1	110717	108851	34409	22319.6	293167	361570	0.677222	0.565834	0.324956	0.946559	0.867577	0.853162
1082.9733++	2	1082.97	0	MLOC_54346.5	IESSSEYTSNLSPASANATR	IESSSEYTSNLS[+80]PASANATR	119.8	AT1G55860.2	UPL1 | ubiquitin-protein ligase 1 | chr1:20879900-20892910 REVERSE LENGTH=3681	124.41	0.9999	3.62243e-13	5.95241e-12	19541.1	13741.2	26748.3	26656.9	34737.2	23910.1	23879.1	37924.2	42968.2	28034.2	27344	16951.2	38646.1	35895.9	30432.1	23244.8	35350.9	30993.1	43701.4	41961.5	18249.3	26934.9	26696	81287.6	0.408051	0.998161	0.710338	0.83566	0.641999	0.456703
938.3895++	2	938.39	0	AK376245	TTSETDFMTEYVVTR	TTSETDFM[+16]TEY[+80]VVTR	108.83	AT2G43790.1	ATMPK6, MPK6, MAPK6, ATMAPK6 | MAP kinase 6 | chr2:18138477-18140693 FORWARD LENGTH=395	119.39	0.9999	1.1508e-12	1.56831e-11	103769	107026	215731	66495.8	96461.8	66739.5	30851.8	159166	34257.3	104562	69969	718846	241563	96111	67925.3	26933.2	210086	63863.9	135165	311674	141197	74836.6	20998.2	61942.1	0.69256	0.73867	0.332656	0.207332	0.117785	0.278349
1171.5503+++	3	1171.55	0	AK364391	AGATLNVAGSSASTNAASSSSLPSMFPAGSAPPLSPR	AGATLNVAGSSASTNAASSSSLPSM[+16]FPAGSAPPLS[+80]PR	119.7	AT5G28900.1	| Calcium-binding EF-hand family protein | chr5:10925852-10929892 FORWARD LENGTH=536	118.39	0.9999	1.44877e-12	1.86611e-11	143402	124251	90951.2	85011.8	7328.28	63277.9	39509.7	83079.9	18841.8	37004.6	80191.6	26204.1	15639.8	56513	94320.4	25486.5	41752.7	15280.1	10121.2	34448	16003.5	11051.5	87786	74786.2	0.868319	0.879385	0.691953	0.207091	0.0737293	0.118161
726.5664++++	4	726.566	0	MLOC_76355.1	SNHNLSQVSEGVLSGDENHTEDTPTR	SNHNLSQVSEGVLS[+80]GDENHTEDTPTR	119.72	AT4G31120.1	SKB1, ATPRMT5 | SHK1 binding protein 1 | chr4:15132185-15136568 REVERSE LENGTH=642	115.36	0.9999	2.91072e-12	3.38848e-11	16262	38531.2	108334	145699	21772.7	51866.8	43800.7	105902	196505	96444.6	83583.4	205904	98744.7	107502	42733.3	42141.9	133922	117874	87086.7	204996	72961.9	38925.3	49929.9	104168	0.643179	0.713738	0.340973	0.961828	0.491077	0.570715
701.0541++++	4	701.054	0	MLOC_52687.1	AHGTAVGLPSDDDMGNSEVGHNALGAGR	AHGTAVGLPSDDDM[+16]GNS[+80]EVGHNALGAGR	119.73	AT3G08590.2	| Phosphoglycerate mutase, 2,3-bisphosphoglycerate-independent | chr3:2608683-2611237 REVERSE LENGTH=560	113.71	0.9999	4.25598e-12	4.73375e-11	158111	178421	109776	219295	139868	150713	93959.6	199474	263244	222738	184883	231483	130538	103930	115698	113909	332168	287833	267813	349878	151743	62305.4	104214	352330	0.742715	0.418983	0.825997	0.313482	0.026062	0.365882
987.1201+++	3	987.12	0	MLOC_65519.1	DNPPDLADLVPTGALSSSEESVENPTPK	DNPPDLADLVPTGALSSSEESVENPT[+80]PK	93.96	AT1G44835.2	| YbaK/aminoacyl-tRNA synthetase-associated domain | chr1:16939909-16942337 FORWARD LENGTH=308	102.27	0.9999	5.92925e-11	4.56175e-10	29086.8	19882.3	67319.5	45694.5	26552.1	25431.1	28433.7	21501	55287.5	31696.6	89642.3	23036.8	23283.8	40007	56236.4	9820.52	30754.4	18961.2	26761.5	21288.6	18726	16690.7	47093.1	20569.6	0.25498	0.376248	0.521234	0.592656	0.131196	0.294175
805.8715++	2	805.871	0	MLOC_39126.1	GGPAAVMQSAATINAR	GGPAAVM[+16]QSAAT[+80]INAR	104.08	AT3G22500.1	ATECP31 | Seed maturation protein | chr3:7971920-7972865 REVERSE LENGTH=256	97.85	0.9999	1.64059e-10	1.08279e-09	56764.5	35008.9	246483	335668	12668.1	48410.6	111765	52468.7	44781.4	23938.7	184149	61042.7	73036.7	85444	132862	26022.7	88909.6	40712.1	131453	28188.7	24668.2	29635.7	146241	80723.1	0.164317	0.0741811	0.510223	0.524979	0.0210944	0.550634
755.3453++	2	755.345	0	MLOC_60439.1	IEIGGSPVSAAGDEK	IEIGGS[+80]PVSAAGDEK	119.5	AT3G21290.1	| dentin sialophosphoprotein-related | chr3:7482318-7488676 FORWARD LENGTH=1192	97.76	0.9999	1.67494e-10	1.10364e-09	40973.6	61037.9	534112	456610	63125.5	335636	88900.8	51120.1	53633.8	385337	393798	611082	505553	65592.9	56905.7	41058.6	152789	79034.7	493738	255404	45791.9	96587.5	47587	94462.7	0.491657	0.00561224	0.0811276	0.83656	0.450661	0.445496
546.9344+++	3	546.934	0	AK369180	AQTAALISHGSFDLK	AQTAALISHGS[+80]FDLK	119.69	AT1G09815.1	POLD4 | polymerase delta 4 | chr1:3189460-3190050 FORWARD LENGTH=124	97.18	0.9999	1.91426e-10	1.22691e-09	76543.3	115179	180014	197764	24808.4	77074.9	250373	61410.4	62490.8	93360.6	170024	100502	144169	118611	195028	104188	132059	289822	244038	124580	43254.7	65237.3	256345	53940.1	0.368072	0.0417217	0.256136	0.727193	0.0300701	0.957271
712.8338++	2	712.834	0	AK249237.1	AMPGGTTSGIISPR	AMPGGTTSGIIS[+80]PR	119.8	AT1G80210.1	BRCC36A, AtBRCC36A | Mov34/MPN/PAD-1 family protein | chr1:30163357-30165628 REVERSE LENGTH=406	95.81	0.9999	2.62422e-10	1.5949e-09	15803.7	25574.9	86501.8	57088.3	10347.7	25143.2	99747.7	147122	57653.4	38724.9	12426.8	48508.2	175109	39849.5	104454	121620	55635.8	75318.7	74360.9	128719	68532.8	71785.3	137235	113830	0.873029	0.619292	0.311005	0.517613	0.616665	0.476125
918.4066++	2	918.407	0	MLOC_57581.1	DIEITHQISPESSDGK	DIEITHQIS[+80]PESSDGK	119.74	AT3G60240.4	EIF4G, CUM2 | eukaryotic translation initiation factor 4G | chr3:22261842-22268295 FORWARD LENGTH=1727	95.38	0.9999	2.89734e-10	1.7371e-09	344150	476745	378396	513214	469429	481307	312421	291747	374372	497641	377685	409088	442251	373954	422408	228143	727930	877574	747554	589270	218561	265596	415126	516461	0.505692	0.918142	0.886041	0.97723	0.946701	0.808292
773.8485++	2	773.849	0	MLOC_60302.1	SSEPPVSPQSAQPR	SSEPPVS[+80]PQSAQPR	104.41	AT1G34220.2	| Regulator of Vps4 activity in the MVB pathway protein | chr1:12463102-12465911 REVERSE LENGTH=619	94.32	0.9999	3.69828e-10	2.14329e-09	33810	34946.7	35924.8	18007.2	4768.55	13658.1	10037.2	13189.6	111644	52033	43576.4	9498.74	3559.73	29209.7	19997.8	12264.5	158133	149635	102235	242463	29251.4	31009.5	29253.5	40066	0.690659	0.403668	0.906592	0.313741	0.523222	0.506395
724.3104++	2	724.31	0	AK365585	MDSLSTQLTEAR	M[+16]DS[+80]LSTQLTEAR	114.68	AT2G35720.1	OWL1 | DNAJ heat shock N-terminal domain-containing protein | chr2:15016883-15019866 FORWARD LENGTH=538	92.19	0.9999	6.03949e-10	3.26328e-09	40868.4	28547.5	26047.8	43074	29718.4	38120	59301	21476.9	34389.8	49505.3	66966	46150.4	75488.2	104522	157829	38128.2	70093.5	72247.4	60620.1	76003.7	60817.2	15503.9	57986.3	57944.9	0.927672	0.879925	0.692283	0.938075	0.415677	0.414953
691.8192++	2	691.819	0	MLOC_66120.2	GVSSELSPNSVAR	GVSSELS[+80]PNSVAR	119.07	AT4G03110.1	AtRBP-DR1, RBP-DR1 | RNA-binding protein-defense related 1 | chr4:1376612-1379275 REVERSE LENGTH=441	91.7	0.9999	6.76083e-10	3.57563e-09	124207	62964.5	28926.7	651748	22129	146664	54878.7	42449.6	38807.1	92587	62355.9	72000.7	46452.4	451609	19674.2	11740.3	64715.8	527804	98667	143812	467980	55188.2	245480	69949.2	0.423888	0.722819	0.366519	0.848999	0.69754	0.445019
935.8875++	2	935.887	0	MLOC_60285.4	FQDQGGIMTAETGTYR	FQDQGGIM[+16]T[+80]AETGTYR	119.75	AT2G17700.1	| ACT-like protein tyrosine kinase family protein | chr2:7685778-7689278 REVERSE LENGTH=546	90.72	0.9999	8.47227e-10	4.32054e-09	64454.7	66530.8	68585.7	35501.3	58161.1	36677.8	43752.3	27262.1	47780.9	83507.9	87847	69589.6	120233	58985.9	34081.9	22712.7	178497	63631.2	81362.9	104715	43156.9	21788	42449.1	39042.2	0.599374	0.711843	0.614658	0.312969	0.291664	0.208102
1002.4385+++	3	1002.44	0	MLOC_5598.2	ENEKPAEFEEVPVEFEMSDLVSENK	ENEKPAEFEEVPVEFEMSDLVS[+80]ENK	119.85	AT1G15340.1	MBD10 | methyl-CPG-binding domain 10 | chr1:5275895-5277474 REVERSE LENGTH=384	87.7	0.9999	1.69824e-09	7.95902e-09	15454	40657.5	104186	8881.68	2097.29	11234.4	83318.9	81089.6	16943.3	20518.5	53894	38987.6	10714.1	14700.8	118979	103301	38379.9	10482.3	64554.6	43856.4	21327.6	5425.78	118738	47360.1	0.981322	0.0966881	0.63367	0.894714	0.0182172	0.0618327
633.7899++	2	633.79	0	MLOC_4715.1	ASGNSDANLPLK	ASGNS[+80]DANLPLK	119.76	AT3G19770.1	ATVPS9A, VPS9A, VPS9 | Vacuolar sorting protein 9 (VPS9) domain | chr3:6866916-6869114 FORWARD LENGTH=520	87.62	0.9999	1.72982e-09	8.06911e-09	17576.2	26646.7	110613	89629.6	20635.6	31092.6	79128.7	155579	141893	76627.9	34850.6	76606.8	29627	90514	68350.7	68916	56609.5	87620.6	90681.7	87056.1	66547.2	40022.9	64471	94404.4	0.857476	0.886638	0.768865	0.565889	0.16394	0.105087
646.5986+++	3	646.599	0	MLOC_63227.1	SGESGRPYHFGEESYR	S[+80]GESGRPYHFGEESYR	119.95	AT3G22640.1	PAP85 | cupin family protein | chr3:8011902-8013883 REVERSE LENGTH=486	87.56	0.9999	1.75388e-09	8.15279e-09	66093	22719	26240.8	50308.9	81329.2	65741	36300.4	97861.3	136153	149301	113552	361942	158554	70898.7	51663.1	129352	188505	175020	161288	233098	114268	440310	256769	262677	0.82068	0.612897	0.474336	0.615317	0.970215	0.498863
880.4317++	2	880.432	0	MLOC_81213.1	VLHPQLSGQMSPLTR	VLHPQLSGQM[+16]S[+80]PLTR	119.91	AT3G13300.1	VCS | Transducin/WD40 repeat-like superfamily protein | chr3:4304085-4309949 FORWARD LENGTH=1344	85.77	0.9999	2.6485e-09	1.17245e-08	650999	694758	460179	979426	429803	366991	240682	793935	596555	671761	682773	1.00063e+06	690867	374113	208659	326065	335897	415235	689110	154149	266844	165176	274996	822611	0.651483	0.548652	0.597419	0.338513	0.218933	0.428974
571.7839++	2	571.784	0	AK251764.1	LGSLLYSPGR	LGSLLYS[+80]PGR	119.26	AT1G08680.1	ZIGA4, AGD14 | ARF GAP-like zinc finger-containing protein ZIGA4 | chr1:2762820-2768387 FORWARD LENGTH=649	85.3	0.9999	2.95121e-09	1.28228e-08	41128.3	63433	73296.5	146639	45735.1	46677.5	82668	121180	45857.6	72106.7	90575.4	124631	61534.2	88498.1	94774.5	67164.4	35641.7	131604	122410	67721.7	50191.9	19926.2	65030.9	43189.1	0.155789	0.0654236	0.0931237	0.972884	0.0634352	0.404266
876.8580++	2	876.858	0	MLOC_43148.2	NFGGSFGSWSPDMVGK	NFGGS[+80]FGSWSPDMVGK	119.39	AT2G29200.1	APUM1, PUM1 | pumilio 1 | chr2:12549483-12553185 REVERSE LENGTH=968	85.29	0.9999	2.95801e-09	1.28384e-08	12865.8	16914.5	23466.3	12039	7505.09	41256.7	19504.3	22735.5	51719.5	16561	26798.7	45931.2	9704.36	23442.6	83295.8	14804.9	53330.4	55917.8	64982.2	14954	35630.7	41899.2	27553.5	16185.5	0.644298	0.965183	0.44515	0.197777	0.361066	0.977692
739.3216++	2	739.322	0	MLOC_12658.5	DFSGFSTTVPSPR	DFSGFSTTVPS[+80]PR	117.83	AT1G53570.4	MAP3KA | mitogen-activated protein kinase kinase kinase 3 | chr1:19987391-19990733 FORWARD LENGTH=608	84.33	0.9999	3.68978e-09	1.56404e-08	330494	93502.6	555551	894844	409668	61090.3	46255.7	89415.6	98179.3	883553	689039	894337	604989	212158	130280	49097.2	1.22057e+06	1.4671e+06	1.65288e+06	2.58612e+06	41591.7	89450.4	87873	73267.8	0.648385	0.455123	0.262032	0.310145	0.254653	0.231235
724.3451++	2	724.345	0	MLOC_54044.1	SVATPHSIVDVDK	S[+80]VATPHSIVDVDK	119.8	AT1G15940.1	| Tudor/PWWP/MBT superfamily protein | chr1:5473672-5478050 FORWARD LENGTH=990	83.51	0.9999	4.45656e-09	1.85172e-08	142935	125018	76759.1	109886	92650.8	268122	396490	136029	75695.3	173538	199895	241190	107109	150227	497683	83108.3	185151	29466.7	149198	136602	68653.5	41799.2	187022	1.82996e+06	0.666176	0.887644	0.622903	0.436812	0.0988563	0.409605
884.8555++	2	884.855	0	MLOC_43148.2	NFGGSFGSWSPDMVGK	NFGGS[+80]FGSWSPDM[+16]VGK	119.59	AT2G29200.1	APUM1, PUM1 | pumilio 1 | chr2:12549483-12553185 REVERSE LENGTH=968	82.96	0.9999	5.05825e-09	2.04844e-08	34131.5	24294.7	105905	31006.3	50348.6	77900.5	59382.9	7558.24	242639	166567	70492.2	108679	22976	79113.6	68942.7	9690.92	69307.4	76191.3	36746.4	74754.1	262804	32590.7	96958.9	30040.6	0.753892	0.578791	0.586163	0.592189	0.677291	0.33341
929.0714+++	3	929.071	0	MLOC_52687.1	AHGTAVGLPSDDDMGNSEVGHNALGAGR	AHGTAVGLPSDDDMGNS[+80]EVGHNALGAGR	119.2	AT3G08590.2	| Phosphoglycerate mutase, 2,3-bisphosphoglycerate-independent | chr3:2608683-2611237 REVERSE LENGTH=560	82.21	0.9999	6.01174e-09	2.37437e-08	27820.5	17064.6	68765.2	18107.1	23309.6	50267.2	78074.5	51236	35753.6	32144.3	8935.14	37201.2	41908.7	43165.5	51763.6	43703.6	644092	452168	792379	77105	33682.6	37689.7	12158.2	28213.9	0.800348	0.877969	0.448066	0.196874	0.545336	0.419107
1145.5118++	2	1145.51	0	MLOC_74793.3	DLDLPNEGTPAFYTGTEELK	DLDLPNEGT[+80]PAFYTGTEELK	119.17	-	-	81.83	0.9999	6.56145e-09	2.56359e-08	82843.2	41392.8	19852.4	4290.13	10554.5	18727.8	69427.5	66405.1	26752.9	48284	96136	37495.5	13765.9	15041	66278.5	20121.2	9067.9	12811.4	54878.7	56997.6	36323.8	11898.6	35826.4	72684.2	0.847737	0.617169	0.822216	0.610385	0.0706826	0.216914
720.8313++	2	720.831	0	AK249237.1	AMPGGTTSGIISPR	AM[+16]PGGTTSGIIS[+80]PR	119.94	AT1G80210.1	BRCC36A, AtBRCC36A | Mov34/MPN/PAD-1 family protein | chr1:30163357-30165628 REVERSE LENGTH=406	79.6	0.9999	1.09648e-08	3.99839e-08	24197.7	62447.3	91059.6	138707	12037	243206	89197.4	266605	61259.5	75120.3	66776.9	117191	63104.9	46423	69997.5	181480	59840.4	52911.6	65422.8	535704	30314.9	81477.6	117378	156563	0.352691	0.175452	0.255486	0.291778	0.0673812	0.0449229
745.3140++	2	745.314	0	AK376422	SGPTGDASGFASVEK	SGPTGDASGFAS[+80]VEK	119.85	AT5G16780.1	DOT2, MDF | SART-1 family | chr5:5517784-5521566 REVERSE LENGTH=820	79.39	0.9999	1.1508e-08	4.16982e-08	49049.4	88620.7	146707	134120	24778.5	77441.4	115038	114262	74598.9	130596	143838	144078	362166	102731	157964	115164	213134	211107	240406	732922	109009	96240.8	192935	256188	0.651485	0.359978	0.386179	0.546396	0.932033	0.978208
923.9328++	2	923.933	0	AK369564	SNNQVPEVSPDLGSPVK	SNNQVPEVSPDLGS[+80]PVK	110.36	AT4G39680.2	| SAP domain-containing protein | chr4:18414604-18416938 REVERSE LENGTH=633	79.33	0.9999	1.16681e-08	4.21254e-08	71207.8	131862	29241.7	97787.4	239785	44842.5	58980	182264	14231.4	29869	48218.2	72110.3	54396.6	36736.9	50505.3	199137	59874.1	49991.5	51222.6	67689.8	19190.1	6386.24	24090.1	722838	0.579341	0.795087	0.217794	0.392223	0.477884	0.30001
686.8052++++	4	686.805	1	AK374557	RFLYTGADLDHSEDEHDFIVER	RFLYTGADLDHS[+80]EDEHDFIVER	117.41	AT4G14770.1	TCX2, ATTCX2 | TESMIN/TSO1-like CXC 2 | chr4:8481522-8484825 REVERSE LENGTH=674	78.86	0.9999	1.30017e-08	4.61884e-08	30045.3	34393.1	30846.6	45605.6	38727.8	28918.1	31649	14376.6	39818.1	49539	32789.4	40833.5	53441.5	33602.5	26590.6	6546.6	129331	172942	142099	183911	37670.4	9931.41	10052	24637.8	0.745669	0.966949	0.703189	0.119346	0.0892723	0.0310171
569.7901++	2	569.79	1	MLOC_38229.4	RNTLVSGGVR	RNTLVS[+80]GGVR	98.18	AT1G04700.1	| PB1 domain-containing protein tyrosine kinase | chr1:1316919-1320653 FORWARD LENGTH=1042	78.47	0.9999	1.42233e-08	5.01267e-08	11345.5	146274	9678.93	12502.1	178373	11168	35567.1	15379.4	9490.57	3412.89	7157.13	52408.2	1199.21	12427.2	6914.56	9520.62	141940	14982.3	16163.3	6738.2	16627.9	14631.6	10269.9	1717.62	0.992683	0.428539	0.577937	0.450885	0.492324	0.424499
583.7819++	2	583.782	0	AK355865	ASANSLSAPIR	ASANSLS[+80]APIR	119.49	AT4G10730.1	| Protein kinase superfamily protein | chr4:6609793-6614786 REVERSE LENGTH=711	78.3	0.9999	1.47911e-08	5.19444e-08	50985.2	17536	39791.1	27308	90156.3	27519.1	77244.8	91661.8	46293.5	80071.6	50445.6	98345.7	51673.7	40404.6	36227	30562.3	215538	113199	201516	96006.2	60163.7	33164.2	73829.7	28132.7	0.640034	0.932495	0.664502	0.111052	0.798625	0.522436
827.4197+++	3	827.42	0	MLOC_17069.1	YGNLVQAVIPRPHPSGDPVAGAGK	YGNLVQAVIPRPHPS[+80]GDPVAGAGK	116.88	AT4G36690.4	ATU2AF65A | U2 snRNP auxilliary factor, large subunit, splicing factor | chr4:17294139-17297609 REVERSE LENGTH=551	78.03	0.9999	1.57398e-08	5.47944e-08	203391	137959	143940	139292	186542	178433	156291	155142	144677	129330	149759	154352	282400	179821	23167.6	123666	170550	132053	66173.5	217319	110535	122188	147810	169037	0.146696	0.195255	0.93613	0.598354	0.29102	0.483987
958.4127++	2	958.413	0	MLOC_61699.1	GNDTGISDQGSPAQVFSR	GNDTGISDQGS[+80]PAQVFSR	109.92	AT4G19040.1	EDR2 | ENHANCED DISEASE RESISTANCE 2 | chr4:10431799-10437171 REVERSE LENGTH=718	77.67	0.9999	1.71002e-08	5.88122e-08	63098.6	113840	40842.2	37960.1	60144.1	42424.2	50238.8	42281.7	54467.4	19759.5	19726	46134.7	61969.4	47785.8	56009	44736.7	139963	30318.3	77822	74038.1	35589.1	11949.6	22362	35447.2	0.495163	0.30332	0.375334	0.278669	0.522328	0.319703
774.3713++	2	774.371	0	MLOC_25886.1	DQTAVSPLEVPSPK	DQTAVSPLEVPS[+80]PK	119.09	AT3G14890.1	| phosphoesterase | chr3:5008751-5013060 FORWARD LENGTH=694	75.97	0.9999	2.5293e-08	8.32604e-08	49734.3	90048.2	113434	67792	84161	55633.2	72138.1	56745.1	22468.2	106062	41497.9	79786.6	137313	20808	71233.1	76734.4	41781.6	128914	87600.1	232344	70522.6	47477.6	39533.2	14478	0.0148373	0.197701	0.239859	0.134503	0.212349	0.178249
968.0781+++	3	968.078	0	MLOC_52663.4	MPSQNIADESNVSHDSHEETAVEAPK	MPS[+80]QNIADESNVSHDSHEETAVEAPK	119.91	AT5G22780.1	| Adaptor protein complex AP-2, alpha subunit | chr5:7590100-7597828 REVERSE LENGTH=1013	75.78	0.9999	2.64241e-08	8.66979e-08	69187.3	90358	157287	27211.5	137722	191163	139962	61260.3	70424.3	113450	126146	112577	52938.1	118453	242165	67586.8	135466	40190.9	66242.8	113601	34490.1	83599	208823	48560.2	0.758537	0.523569	0.853838	0.300493	0.0686594	0.670763
717.3060+++	3	717.306	0	MLOC_81952.2	LHNSGGDGGNSILTDGDSPEK	LHNSGGDGGNSILTDGDS[+80]PEK	112.85	AT5G09850.1	| Transcription elongation factor (TFIIS) family protein | chr5:3063488-3065221 REVERSE LENGTH=353	75.54	0.9999	2.79254e-08	9.08772e-08	97248.1	133138	47904.7	210384	115637	36462.5	39733.8	47396.1	135476	74201.4	147330	133202	57628.9	54131.9	79543.8	26511.2	190551	167674	96116.4	154903	122203	195157	33492	76557.1	0.703766	0.346382	0.531134	0.957814	0.154154	0.150159
908.8963++++	4	908.896	0	AK353688	RPHPSPDADDGHVVEEEEAAAAGAAGSGTEGGGGAAPR	RPHPS[+80]PDADDGHVVEEEEAAAAGAAGSGTEGGGGAAPR	110.2	AT5G44280.1	ATRING1A, RING1A | RING 1A | chr5:17836115-17839114 REVERSE LENGTH=522	73.81	0.9999	4.15911e-08	1.29139e-07	22563.7	26628.6	38267.5	25246.3	88809.8	108225	37729.1	11193.6	28727.8	121260	19223.9	82067.7	77557.6	72022.4	15198.3	11840	116512	42596.9	138052	141486	47577.7	38921.6	33240.2	41911.7	0.869057	0.858772	0.592692	0.945577	0.0567296	0.0526457
823.8460++	2	823.846	0	MLOC_8110.1	AGSPASSPYDAPGSFR	AGS[+80]PASSPYDAPGSFR	119.31	-	-	73.54	0.9999	4.42588e-08	1.35943e-07	45359.1	124693	380646	582244	186741	94996.3	75112.3	55483.3	79625	104122	111719	111002	118658	98620.4	95869.8	34853	269159	253140	206112	168060	40896.5	47589.9	60924.5	92457.2	0.749866	0.405686	0.442547	0.519641	0.471749	0.352671
840.3623++	2	840.362	0	MLOC_4008.2	NTWSSTQLESPHGR	NTWSSTQLES[+80]PHGR	119.9	AT2G16485.1	| nucleic acid binding;zinc ion binding;DNA binding | chr2:7137269-7145222 REVERSE LENGTH=1773	72.39	0.9999	5.76766e-08	1.72125e-07	142245	49276.9	131982	106953	74904	64456.9	60386.2	159372	60911.3	48488	89159.4	217968	50559.4	69198.9	116331	141644	144259	161311	181764	163801	63131.7	68104.2	213028	205464	0.571201	0.662476	0.345708	0.602993	0.275718	0.0347236
878.0777+++	3	878.078	1	MLOC_67697.1	MDNLDRNSPAKPSPILNGADPASR	M[+16]DNLDRNS[+80]PAKPSPILNGADPASR	119.78	AT3G16830.1	TPR2 | TOPLESS-related 2 | chr3:5731709-5737531 FORWARD LENGTH=1131	72.02	0.9999	6.28058e-08	1.85491e-07	82670.5	1.53232e+06	766972	146133	114587	1.50104e+06	53665.7	90728.7	58188.1	63335.9	69469.8	96665.8	81362.9	76800.3	94505.5	60302.5	41493.1	44732.9	89953.3	43794.9	19152.6	28294.1	111044	118423	0.428094	0.392786	0.389505	0.439029	0.683961	0.617338
810.8325++	2	810.833	0	MLOC_18160.2	NFSDLSVWSDENK	NFS[+80]DLSVWSDENK	119.88	AT1G04920.1	ATSPS3F, SPS3F | sucrose phosphate synthase 3F | chr1:1391674-1395756 REVERSE LENGTH=1062	70.85	0.9999	8.22243e-08	2.35356e-07	65880.9	282283	39167.9	48155.8	7616.62	21472.5	14340.2	30741.6	10910.6	66016.3	43081	51047.7	59104	42489.3	177919	7116.06	612819	36070.2	631710	473318	201040	30890.7	71181.3	32622.1	0.671977	0.978315	0.880393	0.426094	0.98591	0.377205
708.8114++	2	708.811	0	AK375506	EAVQVSGEQSFR	EAVQVSGEQS[+80]FR	119.96	AT1G65090.3	| unknown protein; FUNCTIONS IN: molecular_function unknown; INVOLVED IN: biological_process unknown; LOCATED IN: ce	69.94	0.9999	1.01391e-07	2.8531e-07	31220.1	79436.3	116671	66894.6	23402.1	105584	211499	37724.7	27847.1	83867.6	128129	103210	18374.8	143081	157404	41895.1	90188.6	99848	197899	109777	54092.3	84544.4	184486	47461.6	0.214773	0.0570812	0.170306	0.0305052	0.00415875	0.461561
896.1127+++	3	896.113	1	AK353762	APASVDPILENAFRSPAHGESTLVK	APASVDPILENAFRS[+80]PAHGESTLVK	119.84	AT5G10240.1	ASN3 | asparagine synthetase 3 | chr5:3212934-3216418 REVERSE LENGTH=578	69.65	0.9999	1.08393e-07	3.01821e-07	163999	144681	176984	174846	130448	131569	210936	145476	94712.4	126546	245557	167146	1.4508e+06	131586	263623	87463	71572	56885.8	376431	130764	52983	69900.4	201446	128738	0.98621	0.137304	0.264305	0.440265	0.554585	0.44869
1099.0305++	2	1099.03	1	AK357964	ALTPEQAQPQPSPPAVTADKA	ALTPEQAQPQPS[+80]PPAVTADKA	119.27	-	-	69.51	0.9999	1.11944e-07	3.09765e-07	341019	210079	328645	60801.8	356208	338603	80093.2	80238.9	107544	42195.1	238658	92319.5	265191	137336	294640	65682.4	235131	82555.1	381364	156732	104719	59838.4	274028	57918.3	0.261835	0.34666	0.230629	0.607407	0.81387	0.142337
775.3847++	2	775.385	0	AK374423	VAAENGTPITIGAAGK	VAAENGT[+80]PITIGAAGK	117.89	AT2G01710.1	| Chaperone DnaJ-domain superfamily protein | chr2:315836-316771 FORWARD LENGTH=311	69.1	0.9999	1.23027e-07	3.37626e-07	394906	50022.6	48403.1	94862.1	62967.7	37431.7	125428	46382.6	30579.2	36744.7	43746.4	41278.1	143778	40802.1	37987.8	771126	15493.8	21741.7	55279.3	17651.6	70447.6	48182.8	37602.3	45080.5	0.4667	0.512969	0.527088	0.192663	0.561053	0.506491
594.6205+++	3	594.621	0	MLOC_60667.3	TAEAAADLLHAASLYGK	TAEAAADLLHAAS[+80]LYGK	119.8	AT2G03440.1	NRP1, ATNRP1 | nodulin-related protein 1 | chr2:1039409-1039972 REVERSE LENGTH=187	67.55	0.9999	1.75792e-07	4.62715e-07	17472.8	18961.5	111776	104070	22354.8	114979	113216	60144.2	20870.7	76379.8	80408.5	100722	46372	100968	131014	67699	59162.5	59629.1	80083.5	81175.3	51744.6	55966.4	88728.5	65831.5	0.441698	0.0416611	0.0254956	0.127219	0.0187423	0.120079
629.3011++++	4	629.301	0	MLOC_61166.1	KPHSIVGHPDFVSPGPEFGHHR	KPHSIVGHPDFVS[+80]PGPEFGHHR	119.89	-	-	67.08	0.9999	1.95884e-07	5.09887e-07	65484.2	67211.5	17318.3	45278.8	33877.7	83410.8	21179	44240.9	104129	91644.6	55783.4	73697.8	153681	59216.5	40931.5	2.11946e+06	59039.9	72266	142678	137083	42193.2	19485	46398.5	13656	0.962034	0.923721	0.784566	0.651532	0.412627	0.450493
1078.5172++	2	1078.52	0	AK358219	QEGVSNPFASQIQLTSLEK	QEGVSNPFAS[+80]QIQLTSLEK	119.76	AT1G05500.1	SYTE, ATSYTE, NTMC2TYPE2.1, NTMC2T2.1, SYT5 | Calcium-dependent lipid-binding (CaLB domain) family protein | chr1:162	66.77	0.9999	2.10378e-07	5.43714e-07	8416.17	19332.5	15606.2	9261.84	11106.7	26408	26540.3	12292	18271.1	11804.9	25818.5	15800.4	11090.1	29675	28535.3	16865.6	34105.6	14030.6	15305.7	39250.3	12311.2	7915.89	23820	28303.9	0.573427	0.884595	0.926976	0.284476	0.00914998	0.250519
1184.0419++	2	1184.04	0	MLOC_57766.1	SAQNAVPYWSADGIPAAQAQNK	S[+80]AQNAVPYWSADGIPAAQAQNK	119.66	AT5G42950.1	| GYF domain-containing protein | chr5:17224436-17231044 FORWARD LENGTH=1714	65.61	0.9999	2.74789e-07	6.90084e-07	71151.4	43391.1	72135.3	56212.8	20442.5	95179.2	103180	50869.3	41337	50854.3	56454.5	50059.8	81369	63328.6	78958.5	32961.4	57217.7	131555	36876.8	80388.6	31330.6	44236.6	72093.1	297921	0.591139	0.922373	0.685169	0.403814	0.194477	0.443675
864.4602++	2	864.46	0	AK353650	SPAPLSPPGFAVPLAVK	SPAPLS[+80]PPGFAVPLAVK	119.85	AT1G29400.2	AML5, ML5 | MEI2-like protein 5 | chr1:10290393-10293696 REVERSE LENGTH=800	63.33	0.9999	4.64515e-07	1.10143e-06	31059.4	14295.7	132994	81376.2	25676.2	7343.73	6505.41	160319	11705.9	12204.2	71808.5	39374.3	17366.6	14386.7	117229	84975.7	17984.3	8958.21	42752.1	33118.6	19999.7	3945.05	84804	17676	0.289741	0.149237	0.195217	0.0505893	0.278972	0.247733
673.3054++	2	673.305	0	MLOC_53531.2	SPETYSLELAR	S[+80]PETYSLELAR	119.77	AT3G22430.1	| CONTAINS InterPro DOMAIN/s: Domain of unknown function XS (InterPro:IPR005380); BEST Arabidopsis thaliana protein	63.31	0.9999	4.66659e-07	1.1052e-06	112786	65872	98972.8	140399	126754	87157.9	62933.6	102040	352360	152817	170013	155211	413983	132294	82096.4	72437.5	393341	338934	181253	376441	194372	49854.3	85189.9	52258	0.460973	0.274214	0.629623	0.226343	0.192654	0.193674
1203.8349+++	3	1203.83	0	MLOC_12678.2	SDEEGFGGVYGQNDPVLNPGTEMHPNHPEYDK	S[+80]DEEGFGGVYGQNDPVLNPGTEMHPNHPEYDK	118.12	AT5G66780.1	| unknown protein; Has 1807 Blast hits to 1807 proteins in 277 species: Archae - 0; Bacteria - 0; Metazoa - 736; Fun	62.85	0.9999	5.188e-07	1.20932e-06	30756.7	30637.5	80032.6	20792.8	7426.21	38765.8	59670.4	105153	58439.8	43783.4	32941.1	58691.2	131636	29281.6	64655.6	132847	162277	164487	25094.4	30642.3	37143.9	41253.1	109177	61721.4	0.947383	0.476924	0.374993	0.613436	0.684499	0.406899
721.0752++++	4	721.075	2	MLOC_81213.1	KDSFGNEEPRGGQVDGTVSDPHPTFK	KDS[+80]FGNEEPRGGQVDGTVSDPHPTFK	119.88	AT3G13300.1	VCS | Transducin/WD40 repeat-like superfamily protein | chr3:4304085-4309949 FORWARD LENGTH=1344	60.08	0.9999	9.81748e-07	2.15273e-06	20250.8	65187.5	97588.6	72249	114565	114505	106434	50244.1	79602.6	98677.3	138149	139470	272905	194441	124926	33793	108464	180518	207109	176659	84267.8	53831.1	110129	77613.8	0.368818	0.153912	0.231337	0.645421	0.536927	0.226394
1003.4746++	2	1003.47	1	AK250638.1	RFVSPAGYATNIEPEFK	RFVS[+80]PAGYATNIEPEFK	119.69	AT4G00830.2	| RNA-binding (RRM/RBD/RNP motifs) family protein | chr4:352782-354965 FORWARD LENGTH=495	57.76	0.9999	1.67494e-06	3.47431e-06	69918.4	44600.5	56683.2	57589.5	29307.7	48436.1	44090.3	81993.5	28853.7	76980.2	92378.4	77626	2.17585e+06	30124.7	49945.1	71222.9	47613.7	69518	62142.7	85480.5	17735.2	16800.3	94990.8	164737	0.404133	0.275738	0.185791	0.427145	0.444525	0.469821
607.7637++	2	607.764	0	MLOC_59084.1	NAFESPNLSR	NAFES[+80]PNLSR	119.7	AT3G10360.1	APUM4, PUM4 | pumilio 4 | chr3:3211276-3215144 REVERSE LENGTH=1003	56.69	0.9999	2.14289e-06	4.3215e-06	95795.4	73406.2	81458	83545.4	139194	129593	40514.6	18187.4	148872	187208	82195.2	83763.3	131019	51294.8	37993.3	8004.53	142793	310040	196367	201783	115782	103073	28435.9	68180.9	0.476923	0.846739	0.899356	0.292061	0.00126069	0.03915
786.3932+++	3	786.393	0	MLOC_13342.2	ELSGSNIFGPPPETPARPLAAR	ELSGSNIFGPPPET[+80]PARPLAAR	118.37	AT4G39860.1	| unknown protein; BEST Arabidopsis thaliana protein match is: unknown protein (TAIR:AT2G22270.1); Has 152 Blast hit	56.44	0.9999	2.26986e-06	4.54087e-06	66277.6	62162.3	91920.5	104287	44973.4	453403	73712.6	36899.3	47491	62506.6	104953	18100.4	113769	65656.5	52502.7	3683.06	42519.6	107827	39034.9	31620.5	33426.6	37441.9	46437.7	19312.4	0.269695	0.34091	0.980618	0.467561	0.828388	0.242282
703.3355+++	3	703.336	1	AK250786.1	LAGAGRSGFDALASDGGPGPVR	LAGAGRS[+80]GFDALASDGGPGPVR	115.92	AT1G51510.1	Y14 | RNA-binding (RRM/RBD/RNP motifs) family protein | chr1:19103072-19104753 REVERSE LENGTH=202	56.1	0.9999	2.45471e-06	4.86434e-06	35265.3	98655.1	66269.6	125428	48776.3	40415.6	144016	182190	52555.4	38400.5	222470	59234.4	105226	101938	39686.7	262504	121871	253731	63803.9	67295.3	708048	387454	26160.3	621032	0.476012	0.502926	0.70394	0.685688	0.417022	0.803889
1056.0065++	2	1056.01	0	MLOC_61294.3	AGLGAEPDASVAPLPQSPEPK	AGLGAEPDASVAPLPQS[+80]PEPK	112.34	AT3G57910.1	| D111/G-patch domain-containing protein | chr3:21442771-21443968 FORWARD LENGTH=265	55.22	0.9999	3.00608e-06	5.81835e-06	19918.2	18175.6	45612.2	60827.2	15505.3	21770.4	46796.4	56624.8	19873.1	29588.7	10958	25418.2	64807.4	24014.4	32169.1	47155.8	30422.7	27365.6	36962.5	49046.3	17204.5	7577.28	43480.6	59100.6	0.762454	0.552668	0.187013	0.476931	0.669054	0.318924
424.9652++++	4	424.965	2	AK371348	RAESPRRPPNPSPR	RAES[+80]PRRPPNPSPR	99.72	AT1G16610.1	SR45, RNPS1 | arginine/serine-rich 45 | chr1:5675925-5678686 REVERSE LENGTH=414	54.77	0.9999	3.33426e-06	6.40083e-06	69632	1166.45	1897.29	3704.23	4414.92	27239.8	3229.25	6080.42	20416.8	5127.41	1235.58	8191.43	1137.05	3801.2	4187.22	4829.47	26319	14626.3	4921.37	11759.4	4995.25	5243.58	4188.13	18372.4	0.185436	0.14605	0.187679	0.380077	0.803386	0.298385
718.9828+++	3	718.983	1	MLOC_60571.1	SNTEEDDYHVIGDLRSPK	SNTEEDDYHVIGDLRS[+80]PK	119.73	AT4G09980.1	EMB1691 | Methyltransferase MT-A70 family protein | chr4:6247978-6252030 REVERSE LENGTH=963	53.63	0.9999	4.33511e-06	8.09639e-06	37992.9	95904.3	188071	191206	83823.7	229272	177335	211082	93110.4	83895.5	190933	178311	64398.1	114735	165002	87403.1	111142	96085.5	118238	117158	75524.1	42474.3	28432.6	111279	0.665902	0.0787096	0.082552	0.425671	0.414991	0.246834
718.8427++	2	718.843	0	AK363852	DSTSNPLSPILGR	DSTSNPLS[+80]PILGR	119.68	AT1G36990.1	| unknown protein; LOCATED IN: chloroplast; EXPRESSED IN: 24 plant structures; EXPRESSED DURING: 14 growth stages; B	52.72	0.9999	5.34564e-06	9.81386e-06	13798.7	81322.7	10907.8	61581.6	19104.1	55229.6	74590.1	43729.1	39712.5	30688.1	38135.9	41993.6	31131	45538.2	54242.7	35002.5	66420.2	60843.7	84402.2	71908.3	12906.5	6246.5	17466.1	23142.2	0.465296	0.874835	0.368647	0.454865	0.255026	0.20553
914.1372+++	3	914.137	1	MLOC_10832.5	FRGQSLPPPPPLPTSFVPQSVAANR	FRGQS[+80]LPPPPPLPTSFVPQSVAANR	119.96	AT1G24706.1	THO2, AtTHO2 | THO2 | chr1:8742210-8755243 FORWARD LENGTH=1804	51.83	0.9999	6.56145e-06	1.18391e-05	2430.03	11933.2	11173.7	40355.4	21345.6	18926.1	46922.6	96542.4	11986.8	18434	14347.9	26498.5	39754.4	17294.8	41741.7	59013.2	17520.4	31332.8	14744.1	38994.9	16473.9	9965.81	47674.6	80446.5	0.262335	0.603859	0.0289139	0.30275	0.116144	0.0267748
560.2432++	2	560.243	0	MLOC_36653.1	FSIDMSPVK	FSIDM[+16]S[+80]PVK	119.56	AT3G26560.1	| ATP-dependent RNA helicase, putative | chr3:9750122-9753719 REVERSE LENGTH=1168	51.36	0.9999	7.31139e-06	1.3039e-05	110328	104054	98584.4	183303	100969	88139.5	72909.9	114539	341072	183810	184035	239812	239586	183362	72920.9	44969.3	205100	271811	277316	105100	113692	37991.2	119150	63326.1	0.722244	0.728768	0.619638	0.489545	0.310378	0.255355
1006.0186++	2	1006.02	0	AK374348	QAAVPSPPPPVLEAVPAYK	QAAVPS[+80]PPPPVLEAVPAYK	119.64	AT1G69600.1	ZFHD1, ATHB29, ZHD11 | zinc finger homeodomain 1 | chr1:26182470-26183198 FORWARD LENGTH=242	45.19	0.9999	3.02691e-05	4.74165e-05	62749.7	48104.7	101470	45366.9	2214.26	79549.5	30911.2	29331	23715.2	29276	74674.2	42039	67627.3	76835.8	33058.4	15202.4	24835.8	45656.6	23528.3	41977.5	10875.1	20001.5	84036.1	17739.4	0.807803	0.342972	0.68579	0.340976	0.465181	0.797005
851.4095+++	3	851.41	0	AK363255	SPTGSTTSALLQQYELHQQQVR	S[+80]PTGSTTSALLQQYELHQQQVR	119.94	AT5G63190.2	| MA3 domain-containing protein | chr5:25346145-25348563 FORWARD LENGTH=702	198.51	0.9998	1.40929e-20	5.62729e-18	1.20401e+06	907381	778451	1.54202e+06	1.09362e+06	1.05902e+06	412995	480230	696058	396924	653404	541268	545882	640363	467725	347972	146195	119181	555980	224825	162556	268120	544845	380958	0.625344	0.955924	0.872759	0.886032	0.690723	0.544435
848.6746+++	3	848.675	0	MLOC_43148.2	NQMNAGNFTSSDNSSVGSGYASPR	NQM[+16]NAGNFTSSDNSSVGSGYAS[+80]PR	119.91	AT2G29200.1	APUM1, PUM1 | pumilio 1 | chr2:12549483-12553185 REVERSE LENGTH=968	149.43	0.9998	1.14025e-15	5.55246e-14	171492	184937	130689	166541	120560	138267	106281	158672	128943	135843	153742	140904	119977	127270	96538.4	61999.7	236835	148890	297965	67774.2	46774.3	43454.6	132644	115962	0.582134	0.821211	0.299149	0.863736	0.60964	0.6883
1143.9792++	2	1143.98	0	MLOC_55832.1	AGFESTNSLNSVDNSFSSTSR	AGFESTNS[+80]LNSVDNSFSSTSR	116.96	AT4G21160.4	ZAC | Calcium-dependent ARF-type GTPase activating protein family | chr4:11284694-11286532 FORWARD LENGTH=337	134.82	0.9998	3.2961e-14	8.49117e-13	9802.19	27326.5	72844.9	32769.9	11139.3	26292.2	58645.6	23573	24647.6	28047.4	28358.8	48137.2	27819.9	24119.8	58344.1	21418.4	32850.7	27989.2	38448.7	21589.6	10881.3	20525	58234.9	19126	0.510751	0.250456	0.334744	0.352389	0.017514	0.494836
1051.1187+++	3	1051.12	0	MLOC_74303.1	FNATVERPYYDSTSVDESESVGSPGYSK	FNATVERPYYDSTSVDESESVGS[+80]PGYSK	119.68	AT5G03280.1	EIN2, PIR2, CKR1, ERA3, ORE3, ORE2, ATEIN2 | NRAMP metal ion transporter family protein | chr5:788589-793066 FORWARD	128.3	0.9998	1.47911e-13	2.77281e-12	14756.3	44879.7	36022.5	38561.2	6952.89	55131.6	82341.5	81273.3	15552.5	30898	38161.8	50628.1	36326.6	74181.3	173462	52538.9	51193.2	24992.2	53055.4	43404.9	12028.2	30133.4	209171	130255	0.678674	0.36616	0.306659	0.113203	0.0722153	0.104326
930.3921++	2	930.392	0	AK376245	TTSETDFMTEYVVTR	TTSETDFMTEY[+80]VVTR	119.38	AT2G43790.1	ATMPK6, MPK6, MAPK6, ATMAPK6 | MAP kinase 6 | chr2:18138477-18140693 FORWARD LENGTH=395	128.05	0.9998	1.56675e-13	2.88297e-12	45837	129078	143975	21813.9	165319	85898.6	24747.2	30418.6	111555	72887.6	50784.4	26528.2	70236.5	72795.6	41187	13460.4	193183	87083.1	172835	26232.2	31919.7	24776.4	85588.2	38047.7	0.698349	0.926126	0.163677	0.588008	0.469048	0.264731
931.1172+++	3	931.117	2	AK375664	AREGETVVPGGTGGKSLEAQQNLAEGR	AREGETVVPGGTGGKS[+80]LEAQQNLAEGR	119.35	AT2G40170.1	ATEM6, GEA6, EM6 | Stress induced protein | chr2:16779792-16780167 REVERSE LENGTH=92	126.8	0.9998	2.0893e-13	3.65902e-12	69997.1	45802.4	110013	51852.4	28241.4	43450.5	137088	40891.9	51939.7	62171.9	206654	66475.5	74190.4	55649	208697	24340.5	103516	142785	223168	87950	26056.5	14122.1	160525	37903.1	0.82505	0.112078	0.751128	0.815177	0.0172822	0.659458
812.8538++	2	812.854	0	AK374094	QNSFSFTGSVSEVR	QNS[+80]FSFTGSVSEVR	118.16	AT5G52580.1	| RabGAP/TBC domain-containing protein | chr5:21338052-21342848 FORWARD LENGTH=673	119.44	0.9998	1.13763e-12	1.55567e-11	243803	338743	398899	528143	174551	161946	269248	338700	278740	236702	421591	146674	117937	224517	247356	184080	431206	342860	606367	488222	48451.9	110583	308947	273047	0.871637	0.168703	0.654601	0.367364	0.057952	0.0786746
1231.6010+++	3	1231.6	0	MLOC_60294.2	TGFSSGPPPASPPVAGGPVPSSYNTVPPPPDEIQLAK	TGFSSGPPPAS[+80]PPVAGGPVPSSYNTVPPPPDEIQLAK	119.86	AT2G25970.1	| KH domain-containing protein | chr2:11071844-11075604 REVERSE LENGTH=632	100.19	0.9998	9.57194e-11	6.89905e-10	299282	372319	225725	302960	502009	489883	170397	389930	169797	52786.1	318351	377344	17231.7	291466	357633	197486	57943.7	21748.7	80124.6	276448	16436.5	10215.2	123192	70714.2	0.852486	0.763503	0.200086	0.716074	0.847809	0.840766
662.8109++	2	662.811	0	AK364391	GSSAGPSSLGSPLK	GSSAGPSSLGS[+80]PLK	119.32	AT5G28900.1	| Calcium-binding EF-hand family protein | chr5:10925852-10929892 FORWARD LENGTH=536	96.3	0.9998	2.34423e-10	1.45124e-09	169691	187001	291798	228018	165591	148524	229997	125310	151409	271631	251335	284330	204415	153202	156881	70923.1	190556	285343	413636	195196	78125.8	77663.1	247271	99889.6	0.141882	0.0975085	0.14805	0.643084	0.27459	0.337563
1040.8729++	2	1040.87	0	AK361801	GGGGGGGGGGCFSCGESGHFSR	GGGGGGGGGGC[+57]FSC[+57]GES[+80]GHFSR	113.55	AT4G36020.1	CSDP1 | cold shock domain protein 1 | chr4:17043443-17044342 REVERSE LENGTH=299	91.92	0.9998	6.42688e-10	3.43541e-09	557481	52736.1	44211.1	90415.4	51986.2	264857	127858	29338.6	107021	171841	135668	581689	672042	172781	60589.7	6730.19	109873	170816	96504.1	142378	143058	48814.8	40417.5	52780.7	0.500228	0.38882	0.954553	0.596073	0.389393	0.312511
745.3140++	2	745.314	0	MLOC_54389.1	GLVSYGDGSPDSAGK	GLVSYGDGS[+80]PDSAGK	119.88	AT3G63400.2	| Cyclophilin-like peptidyl-prolyl cis-trans isomerase family protein | chr3:23412449-23415435 FORWARD LENGTH=387	88.17	0.9998	1.52405e-09	7.20183e-09	415614	298525	178058	166437	488141	385541	96369.2	83690.5	372768	413961	341729	89612.5	350652	243016	208043	34295.6	757997	669495	550097	759852	139482	271417	290106	181739	0.760168	0.400777	0.5216	0.835049	0.35031	0.176703
868.7374+++	3	868.737	0	AK362660	LGDNSLATLDFSHPDVSPERPEK	LGDNSLATLDFSHPDVS[+80]PERPEK	118.95	AT3G62240.1	| RING/U-box superfamily protein | chr3:23033592-23036653 REVERSE LENGTH=812	86.29	0.9998	2.34963e-09	1.05535e-08	156903	101358	98474.9	101849	144855	145016	487257	126704	75387.5	58255.5	105891	88403.9	78362.6	117975	197612	59478	39105.9	20257.2	64149.3	71217.4	31682.4	35187.8	115577	126362	0.519926	0.981715	0.935044	0.77705	0.26156	0.661687
1196.0485++	2	1196.05	0	MLOC_43627.4	LGSPIGYVGLNDDSGSILSSMGR	LGS[+80]PIGYVGLNDDSGSILSSM[+16]GR	116.21	AT3G07810.1	| RNA-binding (RRM/RBD/RNP motifs) family protein | chr3:2492875-2495052 FORWARD LENGTH=494	79.53	0.9998	1.11429e-08	4.05965e-08	36427.3	17186	11904.8	123780	10402.1	27484.4	14298.2	16521.5	14923.4	25961.5	35329.6	10558.7	76840.5	18194.2	11623.3	20306.5	72543.2	36433.1	35800.6	35476.4	28402.2	13081	12340	22653.8	0.491946	0.539609	0.727667	0.448526	0.323486	0.446503
740.8614++	2	740.861	1	AK364391	RGSSAGPSSLGSPLK	RGSSAGPSSLGS[+80]PLK	118.81	AT5G28900.1	| Calcium-binding EF-hand family protein | chr5:10925852-10929892 FORWARD LENGTH=536	78.85	0.9998	1.30317e-08	4.62537e-08	120412	174974	215036	105408	139319	213951	128441	192111	323740	319508	226937	123056	149547	213999	217121	46896.6	158049	23677.6	176984	53992.2	85329.3	62267.8	240314	326581	0.808342	0.93864	0.246719	0.550537	0.171892	0.523253
722.7929++++	4	722.793	2	MLOC_81213.1	MMDSDVTSGQGAFDRKDSFGNEEPR	M[+16]M[+16]DSDVTSGQGAFDRKDS[+80]FGNEEPR	119.86	AT3G13300.1	VCS | Transducin/WD40 repeat-like superfamily protein | chr3:4304085-4309949 FORWARD LENGTH=1344	75.89	0.9998	2.57632e-08	8.46687e-08	246512	348495	160641	295141	132298	158084	2.49393e+06	127943	234179	209168	278269	248171	159547	267990	184860	128409	124311	222506	222149	130409	108967	106515	253498	204081	0.395179	0.741265	0.73841	0.470867	0.381799	0.545202
983.4751++	2	983.475	0	MLOC_5484.1	ASALAALSNAAFNPSPQQK	ASALAALS[+80]NAAFNPSPQQK	119.72	AT2G41740.1	VLN2, ATVLN2 | villin 2 | chr2:17410962-17416878 REVERSE LENGTH=976	74.23	0.9998	3.77572e-08	1.189e-07	39498.6	41577.3	71248.4	20664.1	11433.1	50158.4	96893.3	24703.6	25263.2	83089.6	24734.6	55772.8	35172.8	43661.1	100731	19938.9	36432.7	27551.7	35471.7	73276.5	7638.57	20591.6	47153.9	28251.9	0.427551	0.563744	0.420004	0.205264	0.0811482	0.558984
708.3088++	2	708.309	0	AK354074	ENSGFTFLHQR	ENS[+80]GFTFLHQR	113.68	AT5G20490.2	XIK, ATXIK, XI-17 | Myosin family protein with Dil domain | chr5:6927064-6936079 REVERSE LENGTH=1465	71.91	0.9998	6.44169e-08	1.89548e-07	128160	106046	163490	67458.5	187489	222392	155786	52244.5	119654	161256	239505	71850.4	249201	167205	165335	51840.3	159212	228544	141182	227687	172068	133126	619436	28107.3	0.511601	0.290389	0.828023	0.473705	0.549045	0.0236619
807.3789++	2	807.379	0	MLOC_13086.1	MVSIHSSQQIFTR	MVS[+80]IHSSQQIFTR	119.09	AT2G21580.1	| Ribosomal protein S25 family protein | chr2:9236629-9237510 FORWARD LENGTH=108	71.76	0.9998	6.66807e-08	1.95346e-07	22551.7	27077	48736.7	37563	41918.6	68485.7	85827.8	140367	61068.6	58097	21352.4	63074.9	81591.9	123266	46823.1	109209	62749.3	142000	128044	55834.7	22489	26858.6	97138.1	100987	0.539879	0.667282	0.838513	0.515123	0.313657	0.0483031
1187.4989++	2	1187.5	0	MLOC_5031.3	GYIEGEGGEGLPGDTEINMSPR	GYIEGEGGEGLPGDTEINM[+16]S[+80]PR	98.44	AT4G26190.1	| Haloacid dehalogenase-like hydrolase (HAD) superfamily protein | chr4:13262473-13266282 REVERSE LENGTH=1057	71.18	0.9998	7.62079e-08	2.19235e-07	38045	26088.4	10946.2	31492.3	22314	23204.1	28286.5	39357.7	14505.5	22727.7	12869.4	10092.1	31030.9	6381.59	11679.7	32233.7	26667.6	32949.9	11917.5	19038	31794.8	10868.2	37848.2	4678.42	0.919464	0.167432	0.548861	0.0850956	0.794619	0.813332
977.9418++	2	977.942	0	AK354565	SVNPSAVSVGMMQPVSPR	SVNPSAVSVGM[+16]M[+16]QPVS[+80]PR	119.67	AT5G58620.1	| zinc finger (CCCH-type) family protein | chr5:23693959-23695782 FORWARD LENGTH=607	68.53	0.9998	1.40281e-07	3.80016e-07	22597.9	24920	17141.1	31853.8	9969.62	27431.2	22292.7	32403.2	67159.7	86423.2	42399.4	23907.3	18746.2	32979.5	22560.9	16526.2	47380.5	26800.2	28786.9	13652	24229.1	22430.3	7028.19	6742.36	0.989718	0.352312	0.246451	0.148461	0.960574	0.922072
830.3376++	2	830.338	0	AK371508	GNLADSEMSSVGSPGR	GNLADSEM[+16]SSVGS[+80]PGR	107.12	AT1G04300.1	| TRAF-like superfamily protein | chr1:1148818-1153895 REVERSE LENGTH=1074	67.86	0.9998	1.63682e-07	4.33985e-07	14826.4	20627.1	35409.4	40274.9	5328.92	26081.6	13616.3	49431.4	40316.9	63626.6	20664	55500.4	48218.6	47493.6	21889.8	31697.5	111493	128356	69633.4	105280	27161.7	29192.3	39276.7	70822	0.743026	0.714291	0.764329	0.637371	0.900318	0.251736
678.0649++++	4	678.065	2	AK369729	RPRSPDDDRGLDLGNFEGSANAAAK	RPRS[+80]PDDDRGLDLGNFEGSANAAAK	110.78	AT5G20930.1	TSL | Protein kinase superfamily protein | chr5:7098213-7102970 FORWARD LENGTH=688	67.07	0.9998	1.96336e-07	5.10729e-07	65907.4	60105.7	24845.9	68471.1	59183.9	47935.3	15175.3	34841.9	16069.3	108851	113572	65761.6	71954.2	65021.1	38573.7	11194.6	76971.4	34729.9	128048	87037.9	31353.5	8550.65	24637.6	68263.3	0.639267	0.407551	0.405891	0.554122	0.134734	0.489247
593.2926+++	3	593.293	1	AK371760	TPPRDYAAPLGELAAR	T[+80]PPRDYAAPLGELAAR	117.45	AT2G32910.1	| DCD (Development and Cell Death) domain protein | chr2:13959685-13961989 FORWARD LENGTH=691	64.7	0.9998	3.38844e-07	8.34158e-07	286169	216766	246781	457311	210771	260984	204672	267305	284043	332502	169089	285961	246649	247574	197593	247100	319047	433442	282297	355195	234282	167734	235316	206575	0.672809	0.212887	0.305186	0.883443	0.332375	0.66984
726.3607++	2	726.361	1	AK360256	VSGAAGPSIDKIEK	VSGAAGPS[+80]IDKIEK	119.94	AT3G23340.1	ckl10 | casein kinase I-like 10 | chr3:8351047-8353791 FORWARD LENGTH=442	60.53	0.9998	8.85116e-07	1.96021e-06	52098.5	20689.2	41612.2	56172.2	18927.3	34568.9	55063.9	10990.9	24622.9	50490.2	52294.6	20729.1	12421.2	33002.5	47801.3	11499.8	30901.1	22784.1	38745.9	18274.1	25419.6	20706.1	38926.8	225601	0.743735	0.463427	0.797423	0.16627	0.0178757	0.466805
592.2634+++	3	592.263	2	MLOC_19482.1	DRAAEGKDEAGSYLGR	DRAAEGKDEAGS[+80]YLGR	107.53	AT3G15670.1	| Late embryogenesis abundant protein (LEA) family protein | chr3:5310141-5310901 REVERSE LENGTH=225	60.34	0.9998	9.24698e-07	2.03546e-06	34063.1	18902.3	18138.5	103533	302747	28773.8	30553.8	137615	69316.6	40244.2	13693.1	101012	52028.5	36451	36752.2	645679	40594	45598.4	66150	117302	13976.3	58657	36651.2	16991	0.405865	0.4988	0.0383212	0.464504	0.432727	0.568865
771.8516++++	4	771.852	2	AK374557	RFLYTGADLDHSEDEHDFIVERSPR	RFLYTGADLDHSEDEHDFIVERS[+80]PR	116.74	AT4G14770.1	TCX2, ATTCX2 | TESMIN/TSO1-like CXC 2 | chr4:8481522-8484825 REVERSE LENGTH=674	58.5	0.9998	1.41254e-06	2.98743e-06	115469	62105.9	45510	51202.2	46241.1	62624.3	33689.2	22696.9	55262.8	49282.2	72978.8	138885	68073.1	61051.9	71996.1	20253.7	91258.4	55205.8	91878.8	116592	75497	37675.2	58363.7	41614.9	0.21728	0.492457	0.669461	0.484389	0.589006	0.050572
808.3819+++	3	808.382	2	MLOC_57766.1	LGGRDDRPGSADDLKGETAGSLR	LGGRDDRPGS[+80]ADDLKGETAGSLR	117.91	AT5G42950.1	| GYF domain-containing protein | chr5:17224436-17231044 FORWARD LENGTH=1714	57.63	0.9998	1.72584e-06	3.56507e-06	104374	75419.7	137447	73083.8	152602	129953	159248	51619.3	101017	144526	181865	84627.5	138651	121783	166544	55450.6	108969	184516	252954	151471	129029	63739.9	147093	72776.8	0.446412	0.125514	0.950343	0.252282	0.143076	0.0034356
637.8086++++	4	637.809	2	MLOC_62083.1	VDRLDLVVAYLEEGMRHHSGR	VDRLDLVVAYLEEGM[+16]RHHS[+80]GR	119.8	-	-	56.75	0.9998	2.11349e-06	4.26867e-06	52000.2	27618.1	6849.65	17158	23380.3	12648	13594.4	5338.66	18940.7	36533.4	26932.1	23872.9	38286.8	13535.3	24539.9	2785.87	4957.05	16843.8	5513.48	11665.9	21113.3	11097.2	20080.5	12037.3	0.920497	0.515404	0.644698	0.107957	0.281679	0.07476
630.2814++	2	630.281	0	AK250482.1	YAGSPLSDLEK	YAGSPLS[+80]DLEK	116.07	AT2G29210.1	| splicing factor PWI domain-containing protein | chr2:12558156-12562168 FORWARD LENGTH=878	56.61	0.9998	2.18273e-06	4.38854e-06	18680.1	10570.7	32108.8	108289	22197	45814	52816.6	75121.3	66339.6	91494.8	29954.4	126660	127630	96460.5	22416.8	37626.4	71920.6	59182.3	96673.3	88406.1	56340.2	20132.6	20713	98602	0.963568	0.984084	0.0708462	0.728731	0.378684	0.964526
1030.4828++	2	1030.48	0	MLOC_78807.1	TADGATAEPAVDEKPPSPVK	TADGATAEPAVDEKPPS[+80]PVK	119.33	AT1G08130.1	ATLIG1, LIG1 | DNA ligase 1 | chr1:2542913-2547815 REVERSE LENGTH=790	54.97	0.9998	3.1842e-06	6.13931e-06	115606	101145	112570	192015	97685.9	169982	59884.6	138611	87192.3	157655	81369.6	198414	85040.9	94312.1	181647	86042.8	92232	53511.9	106935	317418	71038.7	24158.8	96205.4	93030.6	0.87114	0.890295	0.0808702	0.812382	0.527345	0.362133
408.1958+++	3	408.196	1	MLOC_44779.2	TFHSERIPR	TFHS[+80]ERIPR	102.08	AT1G79570.1	| Protein kinase superfamily protein with octicosapeptide/Phox/Bem1p domain | chr1:29932856-29937540 REVERSE LENGTH=	54.21	0.9998	3.79315e-06	7.18163e-06	2553.15	14618.9	2286.23	4702.47	364.51	69520.5	27431.9	5613.57	72071.2	1296.16	64685.9	837.617	93784.1	25710	1285.83	3118.99	23729.9	7501.63	9547.85	9162.12	2204.16	21384.9	1100.18	3976.91	0.35505	0.814846	0.310516	0.862711	0.56053	0.461467
931.8975++	2	931.898	0	AK362649	ASASGAAPDSPVPEPMVEA	ASASGAAPDS[+80]PVPEPMVEA	113.48	AT1G22920.1	CSN5A, JAB1, AJH1 | COP9 signalosome 5A | chr1:8109882-8111895 REVERSE LENGTH=357	50.99	0.9998	7.96159e-06	1.40542e-05	95649.2	75253.4	114003	160545	222275	228544	978297	117832	55898.6	67123.1	68585.6	165664	168072	72084	129756	60510.2	63432	168137	111663	143709	46176.9	35269.5	69169.3	70060.9	0.454749	0.261424	0.00875476	0.699328	0.494571	0.372428
761.3697++	2	761.37	0	AK363392	HVPHNSGAGLLSPR	HVPHNSGAGLLS[+80]PR	107.83	AT2G41900.1	| CCCH-type zinc finger protein with ARM repeat domain | chr2:17491352-17493502 FORWARD LENGTH=716	48.6	0.9998	1.38038e-05	2.32863e-05	34866.9	61846.8	94153.6	298238	41173.3	38068.3	33920.8	161746	44956.6	22871.5	30933.6	76021.2	44607.3	38379.3	46302.2	57629.2	116433	105360	175872	119372	104599	124366	89615.5	56668.8	0.956811	0.529143	0.305889	0.927799	0.813717	0.531529
625.7399++	2	625.74	0	MLOC_5540.1	VGSAADWSSQY	VGS[+80]AADWSSQY	116.79	AT3G22850.1	| Aluminium induced protein with YGL and LRDR motifs | chr3:8089067-8090275 FORWARD LENGTH=248	48.58	0.9998	1.38676e-05	2.33839e-05	93243.1	754923	1.1825e+06	700819	142167	640244	698972	571031	62344.7	761274	1.15445e+06	1.06924e+06	165167	799020	1.10811e+06	489602	210050	580108	889644	580160	105242	328838	1.23797e+06	473953	0.00447467	0.0115905	0.050045	0.0832223	0.0329483	0.0017209
952.4108++	2	952.411	0	MLOC_60930.4	MGSLHVSIPEPDPDDAK	M[+16]GS[+80]LHVSIPEPDPDDAK	119.48	AT1G55840.1	| Sec14p-like phosphatidylinositol transfer family protein | chr1:20873891-20876018 FORWARD LENGTH=325	46.13	0.9998	2.43781e-05	3.89211e-05	73267.6	32534.4	39287	66932.7	65429.5	71043.7	39971	57840.3	26977.6	34744	45702.9	226554	52424.2	111193	58310.4	32517.4	89659.7	54975.5	52861.5	72106.7	78694	10715.6	99746.6	52382.3	0.378143	0.461006	0.402871	0.971918	0.981866	0.195456
794.3773+++	3	794.377	0	MLOC_62030.2	ATGAFILTASHNPGGPTEDFGIK	ATGAFILTAS[+80]HNPGGPTEDFGIK	119.85	AT1G70730.2	PGM2 | Phosphoglucomutase/phosphomannomutase family protein | chr1:26669020-26673166 REVERSE LENGTH=605	172.99	0.9997	5.02343e-18	6.68618e-16	1.65721e+07	1.58586e+07	1.69601e+07	1.11809e+07	1.86358e+07	1.74956e+07	1.01063e+07	9.71808e+06	7.57016e+06	5.36567e+06	2.20334e+07	7.3902e+06	1.20612e+07	1.54321e+07	1.48284e+07	5.46775e+06	2.11093e+06	1.38351e+06	6.76642e+06	2.4331e+06	2.85599e+06	3.93509e+06	1.51892e+07	8.25789e+06	0.853288	0.368564	0.745581	0.870598	0.696393	0.551094
698.9912+++	3	698.991	0	AK363158	EISASNASGLTSPGPLSPSDK	EISASNASGLTSPGPLS[+80]PSDK	111.28	AT1G29350.1	| Kinase-related protein of unknown function (DUF1296) | chr1:10268761-10273613 REVERSE LENGTH=831	159	0.9997	1.25893e-16	9.1398e-15	757306	528901	89493.1	127370	724586	538647	375824	38453.8	266437	149963	24957.3	87415.9	335324	53846	268417	1.57141e+06	121832	90322	190270	253208	51278.3	61736.2	52312.7	69939.1	0.632268	0.292969	0.373502	0.588974	0.589525	0.760022
840.4218++	2	840.422	0	AK363255	IAVQNAETLSLTSPR	IAVQNAETLSLTS[+80]PR	113.18	AT5G63190.2	| MA3 domain-containing protein | chr5:25346145-25348563 FORWARD LENGTH=702	154.62	0.9997	3.45144e-16	2.18755e-14	318173	260134	441712	353846	277732	250957	304343	220405	159681	210214	274570	118162	584710	333969	322164	243281	136519	207758	560599	452175	227675	208270	336806	232555	0.755517	0.115933	0.433097	0.48844	0.74217	0.361165
930.4046++	2	930.405	0	MLOC_65750.3	ELGEGSSSGSPVSGLSSSR	ELGEGSSSGS[+80]PVSGLSSSR	119.85	AT4G02510.1	TOC159, TOC86, PPI2, TOC160, ATTOC159 | translocon at the outer envelope membrane of chloroplasts 159 | chr4:1104766-	145.2	0.9997	3.01995e-15	1.19393e-13	313018	243019	191819	184723	323342	283841	192422	203348	263049	112103	262559	276927	214914	174593	333666	139688	196272	121620	155336	61181.9	257857	81619.5	167052	174596	0.165732	0.325326	0.326364	0.288886	0.611085	0.0844681
843.3430+++	3	843.343	0	MLOC_43148.2	NQMNAGNFTSSDNSSVGSGYASPR	NQMNAGNFTSSDNSSVGSGYAS[+80]PR	119.6	AT2G29200.1	APUM1, PUM1 | pumilio 1 | chr2:12549483-12553185 REVERSE LENGTH=968	123.8	0.9997	4.16869e-13	6.65824e-12	67079.7	55814.7	118003	17728.7	88132.5	87147.1	63556.1	66058.6	30997.1	76087.7	39157.3	47875.7	69040.3	55660.5	132361	49154.5	106969	87874.2	34507.1	299516	254683	32201.6	70915	51521	0.855959	0.906309	0.620506	0.325286	0.522294	0.301515
1036.9679++	2	1036.97	1	AK361755	FDTDGDGRISPSELAAVSR	FDTDGDGRIS[+80]PSELAAVSR	118.24	AT5G37770.1	TCH2, CML24 | EF hand calcium-binding protein family | chr5:14999075-14999560 REVERSE LENGTH=161	120.84	0.9997	8.24138e-13	1.19665e-11	376523	372740	591025	581010	57747.6	114926	96287.8	307328	258750	184989	488501	523599	139333	58784.5	64058.6	1.2066e+06	407820	203205	390414	200707	61449.9	42564.6	207189	180889	0.298932	0.14862	0.561755	0.710236	0.526538	0.277546
665.9894+++	3	665.989	0	MLOC_59358.4	IGDSLSAHTNELVAVFSR	IGDS[+80]LSAHTNELVAVFSR	119.91	AT3G43190.1	SUS4, ATSUS4 | sucrose synthase 4 | chr3:15179204-15182577 REVERSE LENGTH=808	119.53	0.9997	1.11429e-12	1.53958e-11	6828.36	12673.2	5290.5	2948.14	10067.5	36105.2	6467.98	20306.9	61987.5	10350.2	15223.4	1222.76	12745.6	8950.5	20136.3	3380.67	8226.5	25876.4	19821.7	32662.6	13955.5	12866.5	5778.22	33219.6	0.667122	0.579307	0.565719	0.496339	0.790049	0.521717
865.8727++	2	865.873	0	MLOC_63275.3	AASDTDVSVHSTFASR	AAS[+80]DTDVSVHSTFASR	119.75	AT5G17330.1	GAD, GAD1 | glutamate decarboxylase | chr5:5711141-5714839 FORWARD LENGTH=502	117.74	0.9997	1.68267e-12	2.12624e-11	36117.8	18966.3	15032.7	37302.2	15513.4	20512.6	10983.1	113500	47792.1	18997.7	25335.6	52378.5	33609.8	10762.9	25806.1	70864.1	172516	141609	93053.6	416840	149851	125096	123684	138960	0.697272	0.472626	0.591025	0.815472	0.830418	0.467111
730.3522+++	3	730.352	0	AK373392	MQSLAGLHADALESLSPNVR	MQSLAGLHADALESLS[+80]PNVR	119.72	AT2G19480.3	NAP1;2 | nucleosome assembly protein 1;2 | chr2:8438601-8441040 FORWARD LENGTH=372	112.34	0.9997	5.83445e-12	6.16322e-11	90777.1	50694.8	51317.6	23041.6	89721.1	85034.4	67123.3	100024	57639.9	71918.8	91318.5	76298.3	83559.7	60641.8	73215.7	65135.3	26352.7	54908	53100	44836.9	43760.5	40984.9	73508.5	85236.6	0.967092	0.778499	0.701672	0.634912	0.948343	0.572377
735.6838+++	3	735.684	0	AK373392	MQSLAGLHADALESLSPNVR	M[+16]QSLAGLHADALESLS[+80]PNVR	119.68	AT2G19480.3	NAP1;2 | nucleosome assembly protein 1;2 | chr2:8438601-8441040 FORWARD LENGTH=372	105.81	0.9997	2.62422e-11	2.25344e-10	217660	169496	91527.6	217470	146498	108174	81760	167354	140015	106512	175502	170058	157558	107282	96704.5	65291.1	81421.2	75248.9	133873	93511.6	23146.8	56664.1	123570	156102	0.58657	0.801223	0.810708	0.730113	0.868681	0.728599
759.3507+++	3	759.351	0	MLOC_59084.1	VQSLGSSMSHTFASAVGSSISR	VQS[+80]LGSSMSHTFASAVGSSISR	119.76	AT3G10360.1	APUM4, PUM4 | pumilio 4 | chr3:3211276-3215144 REVERSE LENGTH=1003	105.74	0.9997	2.66686e-11	2.28514e-10	45280.4	43009.6	256402	17100.4	57878.2	60773.1	45568.9	51121.4	109270	45129.4	72449.8	37412.5	61681.3	60671	63679.3	49145	111389	84546.9	35674.9	105820	158064	34026.8	71780.4	106262	0.310781	0.691462	0.382756	0.35339	0.439994	0.574663
1062.0121++	2	1062.01	0	AK376810	GAVTVTQAPGATVVSYQEHK	GAVTVTQAPGATVVS[+80]YQEHK	119.88	AT3G53040.1	| late embryogenesis abundant protein, putative / LEA protein, putative | chr3:19664797-19666405 REVERSE LENGTH=479	102.62	0.9997	5.47016e-11	4.27443e-10	37867.2	238701	185221	60600.3	20861.4	202068	214564	22798.9	34529.1	173602	401704	68681.5	68455.1	234833	387008	22688.2	95693.7	161066	227417	32658	19845.7	102294	215989	31102.4	0.0227106	0.089478	0.933606	0.079292	0.0579306	0.573393
928.9249++	2	928.925	0	MLOC_36051.1	SVGQSPQQSFVGEALDK	SVGQS[+80]PQQSFVGEALDK	119.09	-	-	100.78	0.9997	8.35603e-11	6.13339e-10	154207	94069.6	18281.9	117420	94234	140794	106705	124414	35189.7	153811	105554	240143	334118	30345.9	154841	165601	33394	27705.3	62954.5	311198	98620.9	184659	345043	176917	0.766239	0.815939	0.121236	0.577405	0.821064	0.827545
790.9956+++	3	790.996	1	AK374934	DGRSPDAGGYGGEDDEEPVVAAK	DGRS[+80]PDAGGYGGEDDEEPVVAAK	119.91	AT1G52500.2	FPG-1, ATFPG-1, ATMMH-1, MMH-1 | MUTM homolog-1 | chr1:19560043-19562855 FORWARD LENGTH=390	98.4	0.9997	1.44544e-10	9.79905e-10	29662.2	31764.8	21839.4	17278.2	14487.9	18098.1	16423.3	28164.1	34576.3	34774.8	29274.6	63796.7	35172.8	16381.8	24278.8	36370.8	222478	84342.1	101633	296009	242532	17726.9	150562	47433.7	0.562029	0.580762	0.796714	0.38652	0.718094	0.497184
710.6744+++	3	710.674	0	MLOC_57581.1	IAPASQSASSLHRPASQEGR	IAPASQSASSLHRPAS[+80]QEGR	105.59	AT3G60240.4	EIF4G, CUM2 | eukaryotic translation initiation factor 4G | chr3:22261842-22268295 FORWARD LENGTH=1727	91.01	0.9997	7.92501e-10	4.07266e-09	260554	7990.2	11319.4	5.49164e+06	661.014	1329.54	53872.3	2519.84	6.96389e+06	3967.76	10794.7	22351.1	33100.4	7552.31	10404.3	7261.44	1.16141e+07	19810.4	44035	66007	6824.76	15523.8	6618.07	442482	0.197462	0.197986	0.324896	0.665957	0.616262	0.447034
578.7477++	2	578.748	0	MLOC_79392.2	TGSLVEDEAR	TGS[+80]LVEDEAR	107.74	AT5G52200.2	| phosphoprotein phosphatase inhibitors | chr5:21202818-21204017 REVERSE LENGTH=211	86.12	0.9997	2.44343e-09	1.09012e-08	371320	26673.5	51090.7	58497.2	176578	30910.5	41913.8	50023.6	38368.9	44104.8	85271.2	405170	47722.8	32293	54801	6061.03	43611	81470.8	59114	187782	66474.3	27416.5	42189.4	61403	0.462419	0.518458	0.688582	0.239003	0.336979	0.316257
929.8981++	2	929.898	0	AK250018.1	LMLSSDSDASPVNSPSR	LM[+16]LSSDSDAS[+80]PVNSPSR	119.89	AT5G24630.5	BIN4 | double-stranded DNA binding | chr5:8432523-8435682 REVERSE LENGTH=446	85.55	0.9997	2.78612e-09	1.22253e-08	33079	17637.3	32486.4	87076.1	79327.1	8528.21	18986.6	20649.6	39896.8	175179	69832.7	40233.8	59323.8	30019.3	5599.92	293018	425359	379058	332267	468821	49376	121039	29131.2	114313	0.892348	0.902943	0.873175	0.814911	0.027637	0.424535
600.3003++	2	600.3	0	MLOC_54389.1	LVSPSPVHQR	LVSPS[+80]PVHQR	97.98	AT3G63400.2	| Cyclophilin-like peptidyl-prolyl cis-trans isomerase family protein | chr3:23412449-23415435 FORWARD LENGTH=387	85.12	0.9997	3.0761e-09	1.32788e-08	133869	15780.6	40197.5	67562.6	1264.9	17262.4	37402.6	13086.3	32776.6	24596.3	25613	2783.71	814.13	187895	35798.6	5972.97	62097.8	72535.9	16321.9	133927	66553.4	15155.1	18625.8	10872.8	0.34843	0.253715	0.876695	0.495938	0.76537	0.616087
608.7715++	2	608.772	0	MLOC_30711.1	ASANSYSAPIR	ASANSYS[+80]APIR	109.77	AT4G10730.1	| Protein kinase superfamily protein | chr4:6609793-6614786 REVERSE LENGTH=711	84.49	0.9997	3.55631e-09	1.5139e-08	78593.6	70074.1	47724	56358.5	111600	116330	89657.1	13117.3	128287	184619	116666	96621.9	216531	88437.6	69290.8	60251.4	131285	83834.9	83927.6	98407.3	53902.9	35874.1	56045.6	99556	0.99786	0.336516	0.278598	0.46859	0.370487	0.285516
638.2802+++	3	638.28	0	AK248403.1	HQHDVQSVPDSPMLDK	HQHDVQSVPDS[+80]PMLDK	119.96	AT2G01190.1	| Octicosapeptide/Phox/Bem1p family protein | chr2:115023-117296 FORWARD LENGTH=720	79.19	0.9997	1.20504e-08	4.33487e-08	61522.8	40814.3	95688.5	46437.9	227558	277064	96930.3	139907	222278	330337	96948.2	52157.7	207157	146626	220161	112559	183918	194409	30322.4	114590	182701	204107	159255	113122	0.758043	0.265072	0.251557	0.9388	0.340151	0.0130168
778.3976++	2	778.398	1	AK371016	KVQPVSLASFNSAK	KVQPVSLASFNS[+80]AK	110.91	AT4G38710.1	| glycine-rich protein | chr4:18078141-18080002 REVERSE LENGTH=452	78.24	0.9997	1.49968e-08	5.25284e-08	26472.9	85324.1	507966	94300.8	41099.8	78744.7	43354	61676.5	63528.8	67391.8	111296	150367	218658	96360.3	161268	32853.9	126910	12166.9	206835	156798	30870.7	3406.5	9653.05	4351.13	0.668513	0.240733	0.180719	0.634494	0.760804	0.418125
713.8073++	2	713.807	0	MLOC_44271.1	GQFMTEYVVTR	GQFM[+16]TEY[+80]VVTR	119.81	AT1G10210.2	ATMPK1, MPK1 | mitogen-activated protein kinase 1 | chr1:3349579-3350776 FORWARD LENGTH=370	75.06	0.9997	3.11889e-08	1.00352e-07	74678.4	69870.5	58612.1	138896	71710.5	64503.2	117276	100504	88010.2	73749.3	125938	201380	99561.8	75551.3	100268	57375.9	325564	292117	138433	163258	62388.6	48377.9	108305	112188	0.883362	0.584122	0.956903	0.350693	0.128023	0.587946
1182.5050+++	3	1182.5	1	MLOC_12066.3	FSLDDIQEVSEEEVEIERQEDYEETYNK	FSLDDIQEVS[+80]EEEVEIERQEDYEETYNK	119.9	AT3G24080.2	| KRR1 family protein | chr3:8695191-8697107 REVERSE LENGTH=630	67.73	0.9997	1.68655e-07	4.45987e-07	54761.1	42874.8	34875.4	31763.2	50321.4	36840.6	6963.17	11978.4	22232.3	16972	12384.6	37299.8	233085	14994	6362.35	6249.61	37307.7	9130.39	28111.4	82673.5	56406.8	9016.1	10648.6	72798.4	0.355618	0.341962	0.551637	0.264261	0.221138	0.32216
925.4240++	2	925.424	0	AK250638.1	FVSPAGYATNIEPEFK	FVS[+80]PAGYATNIEPEFK	106.6	AT4G00830.2	| RNA-binding (RRM/RBD/RNP motifs) family protein | chr4:352782-354965 FORWARD LENGTH=495	63.35	0.9997	4.62381e-07	1.09702e-06	193632	726826	746784	204853	737395	565194	53190.4	243496	811589	1.39411e+06	1.82029e+06	1.76349e+06	2.3127e+06	969228	50902.5	40735.4	2.28037e+06	1.55759e+06	2.39529e+06	2.73603e+06	917228	62751	26335.6	35174.4	0.862866	0.527875	0.656882	0.254902	0.123995	0.136647
925.4200++	2	925.42	0	MLOC_7807.1	VPSTDPDGSLADLAAGQR	VPSTDPDGS[+80]LADLAAGQR	119.8	AT5G42290.1	| transcription activator-related | chr5:16911700-16912032 FORWARD LENGTH=110	62.36	0.9997	5.80764e-07	1.34279e-06	13330.9	28852.5	41723.4	52878.6	27202.2	92560.2	28967.9	12551	37157.9	45489.1	22800.1	34444.1	11792	25566	140906	13489	59225	77857.3	55603.6	35148.1	12123.9	12501.1	123692	23754.9	0.521416	0.845101	0.797748	0.404973	0.148362	0.947947
667.3166++	2	667.317	0	AK249169.1	HIDATLGSGNLR	HIDAT[+80]LGSGNLR	119.98	AT5G45550.1	| Mob1/phocein family protein | chr5:18462284-18464840 FORWARD LENGTH=215	61.56	0.9997	6.98232e-07	1.57695e-06	60091.4	35587.3	57899.1	16473	97906.3	43620.2	45471	15425	48113.4	48489.5	30123.3	78361.9	142238	40720.7	45325.2	22348	39161.2	129508	92264.2	354222	53823.8	35839.7	71469.7	155243	0.538612	0.621362	0.435557	0.15221	0.245016	0.56482
493.7232++++	4	493.723	2	MLOC_80687.1	KRSFDEQSWSELSHR	KRS[+80]FDEQSWSELSHR	119.86	AT4G09510.1	CINV2 | cytosolic invertase 2 | chr4:6021312-6023310 REVERSE LENGTH=558	61.56	0.9997	6.98232e-07	1.57606e-06	189303	202351	232305	166805	180557	478843	182498	167309	242452	320514	232845	327341	354886	315074	229241	100606	264166	522622	374464	335400	3.14322e+06	149943	243615	196015	0.349167	0.456168	0.53054	0.444347	0.403967	0.380537
708.3231++	2	708.323	0	AK369252	AMNALSPYSLPR	AM[+16]NALS[+80]PYSLPR	115.29	AT5G51200.1	| Protein of unknown function (DUF3414) | chr5:20804926-20819408 FORWARD LENGTH=1838	60.76	0.9997	8.3946e-07	1.86531e-06	49267.5	36563.5	43713.8	50565.5	48188.7	33228.5	39604.6	41668.5	61246.1	77874.1	45407.2	115738	84718	85872.9	40088.7	31551.3	155630	178122	114776	79100.3	103104	25486.9	127029	34981.6	0.880468	0.647506	0.869152	0.30846	0.788136	0.121833
615.7612++	2	615.761	0	MLOC_8093.1	TTDASPGAFQR	TTDAS[+80]PGAFQR	107.36	AT1G72710.1	CKL2 | casein kinase 1-like protein 2 | chr1:27372553-27376178 FORWARD LENGTH=465	60.54	0.9997	8.8308e-07	1.95679e-06	55689.7	10356.6	45865.7	92583.7	56602.4	85127	9036.8	4023	210446	109616	89983.1	94229.6	28878.1	36023.2	11556.5	6070.59	111423	260772	64582.8	174682	97890.3	23238.7	8147.33	22877.1	0.990893	0.336081	0.925546	0.669124	0.124091	0.138788
660.2984+++	3	660.298	1	AK374932	YPSLGTGGGFRESPGGGFR	YPSLGTGGGFRES[+80]PGGGFR	114.92	AT3G26400.1	EIF4B1 | eukaryotic translation initiation factor 4B1 | chr3:9666616-9669081 FORWARD LENGTH=532	58.62	0.9997	1.37404e-06	2.91373e-06	331147	209262	145265	30956.3	171238	208841	95828.6	22674.1	392495	423436	298252	59619.6	226777	174382	134231	15216.1	124556	155566	134741	49928.8	145480	67729	157092	46076.4	0.873328	0.420955	0.101475	0.572049	0.179851	0.027067
618.2995+++	3	618.3	0	MLOC_44122.1	GTVLIHSAEQLENYAK	GTVLIHS[+80]AEQLENYAK	117.03	AT3G03960.1	| TCP-1/cpn60 chaperonin family protein | chr3:1024432-1027604 FORWARD LENGTH=549	57.49	0.9997	1.78238e-06	3.66858e-06	78350.8	48525.4	38867	68943.5	43665	43177.3	65822.4	43862.1	44338.7	64407.5	69549.5	71696.9	60868.7	45895.1	64150.6	23833.3	139992	179346	81641.3	184722	114146	57979.3	48764.3	42486.4	0.855696	0.513648	0.688666	0.38591	0.605052	0.244513
727.2908++	2	727.291	1	MLOC_76316.1	DRGDYYGGSLDR	DRGDYYGGS[+80]LDR	119.27	AT5G42820.1	ATU2AF35B, U2AF35B | Zinc finger C-x8-C-x5-C-x3-H type family protein | chr5:17170445-17171296 REVERSE LENGTH=283	54.12	0.9997	3.87258e-06	7.32159e-06	62561.6	37487.1	11812.2	207730	27547.7	35314.3	21829	46232.5	123683	78744.6	219436	215167	116834	17270.8	16337.6	25851.6	77870.5	69071.3	80532.3	131521	47228	18262.2	27059.7	23889.4	0.321694	0.826486	0.0584071	0.283473	0.262285	0.37305
686.6599+++	3	686.66	1	MLOC_55982.1	SGPIISQDIEHDARQSPK	SGPIISQDIEHDARQS[+80]PK	119.71	AT3G48050.2	| BAH domain ;TFIIS helical bundle-like domain | chr3:17734270-17739412 REVERSE LENGTH=1613	52.85	0.9997	5.188e-06	9.55961e-06	75542	47822.6	48630.6	72273.5	60535.8	60054.7	98057.4	43175.5	40424.8	80324.1	54976	54700.3	88015.4	46299.9	41320	12345.5	52469.8	96902.2	78707.8	49506.9	28312.7	29062.7	37590.5	48690.8	0.364961	0.759228	0.842585	0.528617	0.999023	0.325123
846.3987++	2	846.399	0	MLOC_3938.1	AQPAISPPNQTFGQR	AQPAIS[+80]PPNQTFGQR	119.77	AT3G43300.1	ATMIN7, BEN1 | HOPM interactor 7 | chr3:15234235-15245034 REVERSE LENGTH=1758	50.16	0.9997	9.63829e-06	1.67475e-05	24137.8	49780.7	57597.1	65255.4	115365	85664	64227	49011.4	64011.9	100591	54230	252081	236662	54073.4	104225	19034.6	206468	146277	106876	866642	187932	25320.3	67898.4	24037.8	0.992271	0.704731	0.354943	0.086342	0.11415	0.0547309
430.8712+++	3	430.871	0	MLOC_37671.2	HIQSHNFLSK	HIQS[+80]HNFLSK	116.71	AT2G33150.1	PKT3, PED1, KAT2 | peroxisomal 3-ketoacyl-CoA thiolase 3 | chr2:14047814-14050983 REVERSE LENGTH=462	48.95	0.9997	1.2735e-05	2.16295e-05	75576.2	53108	67271.5	103686	134213	41404.9	18016.2	69603.4	92591.4	59014.4	66427.4	174168	1.20407e+06	159000	100023	112424	144803	2.1052e+06	129957	3.22111e+06	182462	129493	182983	67923.4	0.451001	0.617423	0.410057	0.375069	0.367531	0.348896
824.7163+++	3	824.716	1	AK374501	DGGSSFSFQHAPGGFVALERTPK	DGGSSFSFQHAPGGFVALERT[+80]PK	119.93	-	-	48.57	0.9997	1.38995e-05	2.34279e-05	46585.2	63123.2	45696.3	32595.5	31660.7	64375.1	49481	28316.2	57401.7	38093.7	41225.3	16669.4	32992.7	50389.1	53592.4	25301.2	32624.7	52813.9	42410.2	33159.7	20401.4	24981.2	45558	23120.6	0.609244	0.771045	0.137811	0.273769	0.0194416	0.582641
469.2288++	2	469.229	0	AK374932	LSGASPLGR	LSGAS[+80]PLGR	108.6	AT3G26400.1	EIF4B1 | eukaryotic translation initiation factor 4B1 | chr3:9666616-9669081 FORWARD LENGTH=532	42.6	0.9997	5.49541e-05	8.13011e-05	62129	50929	26227.8	26965.9	27398.1	97667.7	44413.2	10103.4	149054	113239	43288.4	61797.4	139768	110432	69893.9	6508.38	24242	28231.2	269531	141878	23950.2	176273	15622.3	5915.26	0.770072	0.72879	0.976667	0.249098	0.669237	0.277882
1161.5580++	2	1161.56	0	MLOC_2643.1	DMPEADIVVLPAGSPVTLDFR	DMPEADIVVLPAGS[+80]PVTLDFR	106.52	AT2G38870.1	| Serine protease inhibitor, potato inhibitor I-type family protein | chr2:16236546-16237050 REVERSE LENGTH=70	143.76	0.9996	4.20727e-15	1.59996e-13	26406.2	118251	476208	217755	232544	738416	122886	392365	325261	62267.3	205994	469164	638654	23903.8	20508.3	82292.5	1.01916e+06	570642	899389	970442	302939	170121	165129	42939.2	0.581368	0.856416	0.811996	0.769622	0.161238	0.281485
912.4286+++	3	912.429	0	MLOC_68482.4	DLLEEFQHFLPDTSVSPQAGTAPR	DLLEEFQHFLPDTSVS[+80]PQAGTAPR	100.91	AT1G24190.1	SIN3, ATSIN3, SNL3 | SIN3-like 3 | chr1:8563858-8569927 REVERSE LENGTH=1330	132.22	0.9996	5.99791e-14	1.35309e-12	42881.2	61093.4	57177.7	35343.8	4469.33	53770.4	46068.5	97870.1	51613.9	20221.9	53298.8	9844.74	18862.9	33500.2	35264.1	108782	31417.9	23435.6	15127.1	12324.9	14883.8	20476.6	62508	6.43604e+07	0.671986	0.995018	0.107047	0.160202	0.0297537	0.421025
1042.0001++	2	1042	0	MLOC_44066.1	MQGIQLGPIASPESFVQGK	M[+16]QGIQLGPIAS[+80]PESFVQGK	119.98	AT3G46920.1	| Protein kinase superfamily protein with octicosapeptide/Phox/Bem1p domain | chr3:17280430-17284857 REVERSE LENGTH=	131.5	0.9996	7.07946e-14	1.54471e-12	58786.6	150553	93473.4	21477.8	224508	147139	67921	51066.3	41280.8	69852	184267	113919	40316.8	189245	131899	13499.4	56126.3	119442	83962.8	70366.8	21348.5	61952.8	230047	57650.6	0.126471	0.169026	0.605935	0.651679	0.592115	0.496043
745.6439+++	3	745.644	0	MLOC_12678.2	TTTAHGDVMTHSFGEGYSTR	TTTAHGDVMTHS[+80]FGEGYSTR	118.82	AT5G66780.1	| unknown protein; Has 1807 Blast hits to 1807 proteins in 277 species: Archae - 0; Bacteria - 0; Metazoa - 736; Fun	112.05	0.9996	6.23735e-12	6.55414e-11	34192.2	291805	411003	17544.1	21459.8	185848	296624	77726.6	59781.1	473947	801875	109936	89375.4	295899	690911	40526.1	534181	144825	398338	136349	48035.6	145111	521931	65680.6	0.65162	0.216062	0.54164	0.086665	0.0603438	0.736136
1109.8373+++	3	1109.84	0	AK368609	ALSTGQVPAEFALPKPDTNMAEASEEAEAEK	ALSTGQVPAEFALPKPDTNM[+16]AEAS[+80]EEAEAEK	119.9	AT1G09760.1	U2A' | U2 small nuclear ribonucleoprotein A | chr1:3159476-3161603 REVERSE LENGTH=249	111.48	0.9996	7.11214e-12	7.35719e-11	30743.9	48672.6	169537	273664	7760.8	22168.6	56588.9	246948	11038.6	9595.73	64815.5	170816	32587.9	17506.6	76502	144134	37721.2	23163.4	114331	49976.7	10352.7	19818.8	128476	297425	0.966188	0.103097	0.167678	0.749033	0.0912934	0.0433836
903.7700+++	3	903.77	1	MLOC_2643.1	DMPEADIVVLPAGSPVTLDFRTNR	DM[+16]PEADIVVLPAGSPVTLDFRT[+80]NR	119.94	AT2G38870.1	| Serine protease inhibitor, potato inhibitor I-type family protein | chr2:16236546-16237050 REVERSE LENGTH=70	109.4	0.9996	1.14815e-11	1.11547e-10	419830	485405	205121	251889	229924	280135	111357	162384	157401	76873	285164	135378	127987	193597	200291	153976	67855.4	26709.4	125618	45350	97268	42043.8	205746	167061	0.923644	0.940405	0.600483	0.817648	0.708529	0.836927
932.4222++	2	932.422	0	AK251227.1	TDLSSLGSYASPGVSGSAK	TDLSSLGSYAS[+80]PGVSGSAK	118.22	AT3G54230.1	SUA | suppressor of abi3-5 | chr3:20073872-20080142 FORWARD LENGTH=1007	94	0.9996	3.98107e-10	2.29386e-09	89968.3	86576.6	101184	108349	145423	58371	65239.3	35390.5	109514	141835	89224.6	228511	459169	115195	65645.4	56522.3	386987	450219	694656	591110	244620	26329.7	61040.3	75395.1	0.849177	0.697392	0.559516	0.153278	0.141643	0.135169
921.3974++	2	921.397	0	MLOC_5653.2	TTSETDLMTEYVVTR	TTSETDLM[+16]TEY[+80]VVTR	105.87	AT4G01370.1	ATMPK4, MPK4 | MAP kinase 4 | chr4:567219-568889 FORWARD LENGTH=376	92.28	0.9996	5.91562e-10	3.20938e-09	51238.3	60479.6	57846.6	17834.5	45463.1	53920.9	82503.8	9853.21	58893.6	68015.6	70359.8	95825	107015	38835.2	50854.1	13989.1	73971.2	141793	63477.3	88953.3	73332.4	27709.9	39351.3	37702.6	0.395729	0.76126	0.833327	0.2112	0.479556	0.109643
778.3976++	2	778.398	1	AK371016	KVQPVSLASFNSAK	KVQPVSLAS[+80]FNSAK	110.9	AT4G38710.1	| glycine-rich protein | chr4:18078141-18080002 REVERSE LENGTH=452	88.91	0.9996	1.28529e-09	6.22079e-09	20491.9	81911.7	330410	103827	38366	68045.1	79667.9	58121.6	65744.2	43629.2	106942	155636	197923	88965.6	174803	39323.2	125991	18944.9	188127	160540	18143.2	17593.6	10602.8	5013.32	0.571233	0.196255	0.146433	0.703808	0.964852	0.48067
658.8159++	2	658.816	0	MLOC_55166.1	TLSLGELNYAR	T[+80]LSLGELNYAR	119.58	AT4G33467.2	| unknown protein; Has 25 Blast hits to 25 proteins in 9 species: Archae - 0; Bacteria - 0; Metazoa - 0; Fungi - 0;	88.34	0.9996	1.46555e-09	6.95004e-09	101120	89882.8	144462	140645	155132	116712	90939	1.7401e+06	79629.5	217585	90029.2	125860	265312	124814	85014.4	38210	274453	115794	106106	116791	73594.6	7.31401e+06	3.68397e+06	2.38094e+06	0.893225	0.609855	0.73656	0.429868	0.448491	0.223584
581.9586+++	3	581.959	0	MLOC_81213.1	VLHPQLSGQMSPLTR	VLHPQLSGQMS[+80]PLTR	110.76	AT3G13300.1	VCS | Transducin/WD40 repeat-like superfamily protein | chr3:4304085-4309949 FORWARD LENGTH=1344	83.99	0.9996	3.99025e-09	1.67893e-08	162363	92144	28042.7	12828.1	300772	50977.9	69875.8	140430	68395.4	105320	47645.1	49587	83573.4	83192.3	158304	78482.7	34894.1	69585.5	31671.1	85348.2	42717.7	26894.6	61706.1	138168	0.991677	0.305235	0.433096	0.391324	0.647533	0.804193
1149.0190++	2	1149.02	0	MLOC_53885.1	STLFPNFGSMFSVAEQQQAK	STLFPNFGS[+80]MFSVAEQQQAK	100.99	AT4G35300.4	TMT2 | tonoplast monosaccharide transporter2 | chr4:16796432-16799071 REVERSE LENGTH=739	83.86	0.9996	4.1115e-09	1.72631e-08	7769.76	6875.37	11047.8	1028.72	4385	37531.2	9259.93	39989.9	27391	12892.7	11823	77161	122967	13421.6	49129.4	27224.4	342921	207858	223660	168010	24243.6	32378.9	37503.5	35376.1	0.719497	0.7574	0.74694	0.604754	0.677472	0.700958
868.8674++	2	868.867	0	MLOC_70787.2	HDAFASGEATPDPSVR	HDAFASGEAT[+80]PDPSVR	114.58	AT5G64270.1	| splicing factor, putative | chr5:25706909-25710718 FORWARD LENGTH=1269	81.87	0.9996	6.5013e-09	2.54257e-08	120117	414046	78330.7	744226	216503	164757	74809.8	82410.3	253879	185852	197403	159880	98458.1	55525.9	220753	56297.2	328440	101842	202399	200502	81982.5	91870.1	105786	50577.2	0.998468	0.382236	0.568166	0.631807	0.982409	0.252386
799.8949++	2	799.895	0	MLOC_10588.1	VLEQLSGQSPVFSK	VLEQLSGQS[+80]PVFSK	113.74	AT2G42740.1	RPL16A | ribosomal protein large subunit 16A | chr2:17791794-17792946 FORWARD LENGTH=182	80.75	0.9996	8.41395e-09	3.17852e-08	149666	70315.1	81279.6	85132.1	124279	118656	50037.6	137610	44082.6	125559	85846.2	87450.4	97897.2	122111	100044	68492.7	62350.2	69976.4	80507.6	49395.2	37262.5	45686.2	98993.1	101851	0.9363	0.938953	0.775017	0.81785	0.917212	0.653779
1007.7701+++	3	1007.77	0	MLOC_5598.2	ENEKPAEFEEVPVEFEMSDLVSENK	ENEKPAEFEEVPVEFEM[+16]SDLVS[+80]ENK	119.93	AT1G15340.1	MBD10 | methyl-CPG-binding domain 10 | chr1:5275895-5277474 REVERSE LENGTH=384	79.11	0.9996	1.22744e-08	4.39961e-08	42534	33475.3	101284	84614.7	21449	24402.5	63168.2	87830.1	131749	507376	86659.4	42707.5	53041.2	35363.8	64167.1	43365.1	50955.2	64568.9	50997.1	30553.3	1.06582e+06	22911.9	37011.6	90016.5	0.501108	0.895939	0.542942	0.41209	0.443111	0.466355
776.3749+++	3	776.375	0	MLOC_68734.1	EIQTPNPMATPLASPGPGVTPR	EIQTPNPM[+16]ATPLAS[+80]PGPGVTPR	119.64	AT1G09770.1	ATCDC5, CDC5, ATMYBCDC5 | cell division cycle 5 | chr1:3162002-3165122 FORWARD LENGTH=844	74.04	0.9996	3.94457e-08	1.23148e-07	92961.8	107502	20587.3	43472.8	101377	89405.7	60932.9	57759.9	47711.2	39987.3	104747	102488	88070	97809.7	80639	25011.3	92948.4	78701.9	83946.4	24686.2	27494.7	30243	106280	63225.9	0.92645	0.80089	0.506079	0.995935	0.72095	0.424983
656.8065++++	4	656.807	0	MLOC_65794.1	GHHGPVGAPVAPDPAYPASGGHPAAEK	GHHGPVGAPVAPDPAYPAS[+80]GGHPAAEK	118.41	AT2G35300.1	LEA18 | Late embryogenesis abundant protein, group 1 protein | chr2:14863066-14863359 REVERSE LENGTH=97	71.62	0.9996	6.88652e-08	2.00568e-07	41991.1	194988	121958	59573.3	44176.4	109255	334815	47174.4	131322	110152	385494	187773	70579.1	145751	401135	28163.5	85178.6	96415.9	327270	113959	61726.8	114462	411318	55585.4	0.320821	0.149479	0.503668	0.018584	0.0060138	0.268981
626.8185++	2	626.818	0	MLOC_74970.2	VGSPISLSSGLR	VGS[+80]PISLSSGLR	115.25	AT3G55600.1	| Membrane fusion protein Use1 | chr3:20620682-20622341 FORWARD LENGTH=240	71.44	0.9996	7.17794e-08	2.08447e-07	58664.4	48671.6	47418.6	40757.5	30776.6	28541.6	65406.1	57610.4	64712.9	62747.3	85064.8	56082.8	104253	47887	52599.5	36060.9	100172	150993	84362.2	65047	48487.3	19677.4	72083.9	57767.3	0.743649	0.908795	0.258048	0.343193	0.932396	0.691142
725.8052++	2	725.805	1	MLOC_4447.2	RFSDASVQSDMK	RFS[+80]DASVQSDMK	119.95	AT5G02500.1	HSC70-1, HSP70-1, AT-HSC70-1, HSC70 | heat shock cognate protein 70-1 | chr5:554055-556334 REVERSE LENGTH=651	69.48	0.9996	1.1272e-07	3.11697e-07	24866.3	21256.2	17754.7	19730.2	131749	51913.9	23155.3	32989.7	48034.8	45647.6	44872.5	28319.3	84386	56926.2	52420.6	20934.5	157111	124361	109813	49518.3	47186.4	28699.9	30145.7	19446.9	0.817432	0.721878	0.400914	0.247769	0.180866	0.125589
469.2470++	2	469.247	1	MLOC_51016.2	RSISPVAK	RSIS[+80]PVAK	98.86	AT3G53500.2	RSZ32, RS2Z32, At-RS2Z | RNA-binding (RRM/RBD/RNP motifs) family protein with retrovirus zinc finger-like domain | ch	68.07	0.9996	1.55955e-07	4.16541e-07	44954.6	6066.51	19560.5	56485.5	90749.3	23135.4	30810.4	2520.47	11308.2	23969.5	13775.7	207665	473.014	37244	7162.78	2242.57	46692.9	26593.1	34918.3	293852	70037.6	19363.5	24001.8	2041.1	0.326515	0.443228	0.163722	0.431989	0.361305	0.19999
587.2814+++	3	587.281	1	AK364999	KLTSMASNIISDLDR	KLTSM[+16]AS[+80]NIISDLDR	119.85	AT4G17890.1	AGD8 | ARF-GAP domain 8 | chr4:9937121-9939146 FORWARD LENGTH=413	64.66	0.9996	3.41979e-07	8.41358e-07	21579.5	17080.9	83271.7	108070	47133.3	56602.4	57352.2	87707.2	23582.6	41022.2	115013	69168.4	77754.7	38831.1	73808.4	27333.6	358196	270463	458868	523703	52587.5	24225.5	47551.6	56573.6	0.868134	0.642058	0.626373	0.242843	0.975065	0.927691
571.0000++++	4	571	0	MLOC_51106.1	FHTHGHHSNSTTPTGEAASPK	FHTHGHHSNSTTPTGEAAS[+80]PK	98.62	AT5G55980.1	| serine-rich protein-related | chr5:22670301-22670642 FORWARD LENGTH=113	63.23	0.9996	4.75335e-07	1.12242e-06	103237	7887.89	1853.82	14169.2	9425.57	11428.8	21003.8	10889.5	14334.7	291643	8630.8	127737	4810.49	15607.6	10971.8	9352.81	106274	384028	33857.4	45370.5	33657.6	8446.38	20157.1	14485.6	0.320886	0.199583	0.805525	0.69651	0.895462	0.676433
586.9743+++	3	586.974	2	MLOC_57148.1	RKSPVATAALPAMPPR	RKS[+80]PVATAALPAM[+16]PPR	109.57	AT4G31360.1	| selenium binding | chr4:15221945-15223310 FORWARD LENGTH=186	60.88	0.9996	8.16582e-07	1.81549e-06	160413	105772	150307	251350	211669	124099	57869.3	67735.3	531150	254170	120517	476182	164127	306848	178395	16938.2	41053.2	87827.7	53117.6	51465.7	466246	33559.8	181907	131120	0.606139	0.460484	0.940858	0.383291	0.301209	0.170637
496.2522++	2	496.252	0	MLOC_61272.1	TPLSPAGLR	TPLS[+80]PAGLR	119.47	AT4G31160.1	DCAF1 | DDB1-CUL4 associated factor 1 | chr4:15145936-15152939 FORWARD LENGTH=1883	58.18	0.9996	1.52055e-06	3.19051e-06	26948.3	43743.9	175801	63728.8	24898.2	40890.9	67937	44850.9	130812	132044	79468.7	31583.7	113472	58463.1	78451.6	36208.8	201967	176316	108217	185986	97303.4	45768.4	36650.6	61224.1	0.970839	0.984198	0.730887	0.390094	0.617711	0.384734
596.2633++	2	596.263	0	AK374932	YPSLGTGGGFR	YPS[+80]LGTGGGFR	119.68	AT3G26400.1	EIF4B1 | eukaryotic translation initiation factor 4B1 | chr3:9666616-9669081 FORWARD LENGTH=532	55.99	0.9996	2.51768e-06	4.96449e-06	42187.7	36307.3	138655	138759	24433	152085	130215	23011.7	156466	264547	135849	334756	217273	199769	130605	24324.3	810288	1.3713e+06	1.19274e+06	493954	511019	119935	173742	120103	0.674378	0.743345	0.962485	0.580668	0.533536	0.310904
646.3603++	2	646.36	1	AK249633.1	LASGLGLRLSPK	LASGLGLRLS[+80]PK	118.84	AT3G19420.1	ATPEN2, PEN2 | PTEN 2 | chr3:6731824-6735354 FORWARD LENGTH=611	54.7	0.9996	3.38844e-06	6.49235e-06	13120.6	37880.1	15702.7	24549.5	15897	25245.1	45558.4	49824.1	13496.6	16050.1	42994.6	11535.6	58459.7	28245.5	16561.4	33369.7	34990.3	32338	43364.2	22595.2	16865.2	24908.1	24903.1	45187.1	0.461302	0.331489	0.913705	0.789962	0.937609	0.492223
581.2581++	2	581.258	0	MLOC_11287.2	QYGSPGFGLR	QYGS[+80]PGFGLR	110.8	AT3G01090.3	AKIN10, KIN10 | SNF1 kinase homolog 10 | chr3:31437-33977 REVERSE LENGTH=512	50.25	0.9996	9.44061e-06	1.64326e-05	260511	218714	25880.7	21619.2	237133	51465.5	38757.9	63881.5	302523	83436	219571	124183	496890	96603.5	32096.1	23475.7	81091.8	132672	86095.1	144213	89350.5	11711	30431.5	55326.6	0.439958	0.325348	0.226479	0.210558	0.180783	0.198612
575.7844++	2	575.784	0	AK363392	GLLSPVNTNR	GLLS[+80]PVNTNR	119.21	AT2G41900.1	| CCCH-type zinc finger protein with ARM repeat domain | chr2:17491352-17493502 FORWARD LENGTH=716	48.18	0.9996	1.52055e-05	2.55e-05	10405	22960	11325	31863.1	26097.8	45789.3	19175.3	92841.9	52373.4	40678.7	31633.5	31625.9	185835	53937.8	57326.1	71428.6	74911.1	110286	77577.6	36174.2	471454	41634.7	11725.9	88023.6	0.736177	0.847115	0.572595	0.299935	0.269202	0.385427
964.7718+++	3	964.772	0	MLOC_74793.3	ATGTPGVGAQDGATTTATVTPGAGGPGNGQDK	ATGTPGVGAQDGATTTATVT[+80]PGAGGPGNGQDK	119.79	-	-	134.36	0.9995	3.66438e-14	9.14491e-13	49921.6	76203.7	101186	129166	152561	57360.9	155215	63854.2	132140	164092	273972	816331	498252	120796	184982	32041.4	62150.7	27521.5	136464	1.1598e+06	621645	46797.7	292863	78618.5	0.878881	0.267644	0.178136	0.133567	0.282918	0.121967
1180.9218+++	3	1180.92	0	MLOC_36505.1	IHVSENPEDIPISTAATVPITVEDSPPPPAAAPK	IHVSENPEDIPISTAATVPITVEDS[+80]PPPPAAAPK	119.68	AT4G17720.1	| RNA-binding (RRM/RBD/RNP motifs) family protein | chr4:9862660-9864498 REVERSE LENGTH=313	91.39	0.9995	7.26106e-10	3.78504e-09	139344	58521.5	107822	10987.4	26402.5	127149	20927.4	45670	63133.4	15504.1	65121.8	36224.2	18430.9	81049.1	119999	34630.8	28994.7	68948	16626.2	43899.8	19025.7	4825.43	44906.5	29491.3	0.503708	0.760959	0.303664	0.298906	0.307514	0.0664052
765.3534++	2	765.353	0	MLOC_4818.1	DLYASNLNSPLSR	DLYASNLNS[+80]PLSR	114.18	AT5G11010.3	| Pre-mRNA cleavage complex II protein family | chr5:3484176-3486067 FORWARD LENGTH=368	90.3	0.9995	9.33254e-10	4.69331e-09	183962	140867	155696	291966	184953	124380	327996	222430	92753.2	90231	117089	111553	201008	169923	170690	127521	94479.7	98121.5	235400	275764	82490.4	44222.1	161446	196022	0.708158	0.394484	0.212374	0.467807	0.401666	0.618369
650.3083++	2	650.308	0	AK354668	NSPASFSGLLAR	NSPAS[+80]FSGLLAR	119.68	AT2G25310.1	| Protein of unknown function (DUF2012) | chr2:10777436-10779123 REVERSE LENGTH=210	82.46	0.9995	5.67545e-09	2.25718e-08	4404.32	34977.3	114163	55494	21557.8	111770	82202.7	22191.4	74313.6	116190	82246.1	168972	79739.2	96972.8	78251.8	16734.3	75483.3	49179.4	122713	93680.3	30075.6	51175.4	36672.2	34112.6	0.684594	0.129988	0.272748	0.194378	0.415619	0.410762
669.3393++	2	669.339	0	MLOC_61057.1	SAESLIDAVKPK	S[+80]AESLIDAVKPK	119.31	-	-	77.79	0.9995	1.66341e-08	5.75066e-08	53160.5	29836.3	98887.5	120397	72387.8	56503.6	125528	93108.5	35086.3	40620	93181	97769.5	162251	47613.6	93966.2	39116.3	237345	114356	172229	172167	60378	35635.5	107207	61630.1	0.570974	0.869757	0.78185	0.254388	0.781929	0.445172
754.7104+++	3	754.71	0	AK354341	STPVDSQPSPAPLPVPHQTVK	STPVDSQPS[+80]PAPLPVPHQTVK	119.48	AT3G63460.1	| transducin family protein / WD-40 repeat family protein | chr3:23431009-23437241 REVERSE LENGTH=1104	77.58	0.9995	1.74582e-08	5.97349e-08	342927	474416	261553	30132.5	561631	431727	332403	133152	315442	449603	511753	151241	460464	413308	437096	72086.9	215336	72424.2	279527	79647.5	123374	144887	369250	137751	0.791519	0.573013	0.0298742	0.769504	0.988352	0.184351
658.8159++	2	658.816	0	MLOC_55166.1	TLSLGELNYAR	TLS[+80]LGELNYAR	119.9	AT4G33467.2	| unknown protein; Has 25 Blast hits to 25 proteins in 9 species: Archae - 0; Bacteria - 0; Metazoa - 0; Fungi - 0;	75.21	0.9995	3.01301e-08	9.71804e-08	49004.1	58703.1	32209.3	23470	78130.2	40062.2	46618.1	1.717e+06	29947.9	65056.3	80107.1	115015	145347	44206.8	36735.7	12162.8	225012	118772	41589	56035.3	109465	7.38407e+06	3.61351e+06	50191.5	0.782394	0.51512	0.643582	0.433643	0.445767	0.481605
1188.0511++	2	1188.05	0	MLOC_43627.4	LGSPIGYVGLNDDSGSILSSMGR	LGS[+80]PIGYVGLNDDSGSILSSMGR	118.04	AT3G07810.1	| RNA-binding (RRM/RBD/RNP motifs) family protein | chr3:2492875-2495052 FORWARD LENGTH=494	74.15	0.9995	3.84592e-08	1.20824e-07	8154.53	17067.5	18104.1	31652.3	20828.7	15851.9	52198.1	42623.1	32525	18034.7	21534.8	11920.8	27453	38380.3	25602.6	39600.7	21847.6	33387.4	16368.9	8179.33	14690.2	8671.04	22110.8	36460.7	0.836085	0.791685	0.746559	0.998327	0.350409	0.0452827
560.7792++	2	560.779	0	AK362667	TVTGHLGISR	TVT[+80]GHLGISR	114.66	AT3G61050.2	NTMC2TYPE4, NTMC2T4 | Calcium-dependent lipid-binding (CaLB domain) family protein | chr3:22597485-22600932 FORWARD L	71.04	0.9995	7.87046e-08	2.26254e-07	55610.1	38268.2	70979.7	129166	10641.5	34667.6	66740.4	54870.1	80312.6	81998.9	107656	238580	223904	94590.7	142911	21761.1	33019	77298.9	130411	166897	85776.8	24501.2	68822.6	42128.6	0.657505	0.124429	0.0729939	0.489741	0.854963	0.399073
602.5489++++	4	602.549	1	MLOC_60667.3	RRPPPQQHRPSGGGSGDLAASAK	RRPPPQQHRPSGGGS[+80]GDLAASAK	99.68	AT2G03440.1	NRP1, ATNRP1 | nodulin-related protein 1 | chr2:1039409-1039972 REVERSE LENGTH=187	67.39	0.9995	1.8239e-07	4.78189e-07	843709	26398.1	3773.69	2563.75	8772.72	44952.9	26331.2	2037.15	12640.6	8609.29	16057.7	7546.39	576.107	2762.99	4496.73	7863.31	18515.6	10384.5	4096.63	36869.7	11451.6	3252.24	2406.39	3692.76	0.422114	0.412243	0.42306	0.556257	0.66778	0.562644
540.4799++++	4	540.48	1	MLOC_36479.4	RAFSDHADEPAYFSSHNK	RAFS[+80]DHADEPAYFSSHNK	119.95	AT3G05680.1	EMB2016 | embryo defective 2016 | chr3:1660802-1672015 REVERSE LENGTH=2138	63.81	0.9995	4.15911e-07	9.98636e-07	84571.2	38654.5	79224.8	28329.9	46815	42762.2	120721	22333.9	45327.3	64345.8	90481.3	49090.6	198423	62746.4	64158.5	49277	70971	212875	138018	166633	72433.2	153653	141822	144303	0.56117	0.194268	0.777362	0.758673	0.95932	0.609653
592.2770++	2	592.277	1	MLOC_24977.1	GRSELDSLAR	GRS[+80]ELDSLAR	119.7	AT2G40170.1	ATEM6, GEA6, EM6 | Stress induced protein | chr2:16779792-16780167 REVERSE LENGTH=92	60.47	0.9995	8.97429e-07	1.98308e-06	108203	50925.2	73098.9	29055.5	120743	75489.1	82047.5	43365.5	55298.7	111454	79486.9	234254	172186	53571.5	157681	67735.1	80243.2	137179	114155	911832	74289.8	66892.2	99934.4	28218.9	0.57649	0.725837	0.36512	0.187681	0.816756	0.130579
894.7124+++	3	894.712	1	MLOC_64351.2	NASTSSDMSSLASQGTPSNSAPLRR	NAS[+80]TSSDMSSLASQGTPSNS[+80]APLRR	119.63	AT1G64110.3	| P-loop containing nucleoside triphosphate hydrolases superfamily protein | chr1:23796887-23801255 REVERSE LENGTH=8	55.96	0.9995	2.53513e-06	4.99643e-06	27436.6	28786.5	92815.2	17649.9	16533.5	84703.3	102235	15812	26236.1	44303	55118.1	22722.1	38174.6	79907.6	168348	12096.3	72531.2	20736.5	78416.4	58728.3	69973.1	8162.59	117036	28154.3	0.585018	0.173573	0.681881	0.621407	0.040676	0.294791
581.2448++	2	581.245	0	MLOC_13519.1	DQTGSFLGEK	DQTGS[+80]FLGEK	119.08	AT1G52690.2	| Late embryogenesis abundant protein (LEA) family protein | chr1:19619842-19620589 FORWARD LENGTH=169	55.65	0.9995	2.7227e-06	5.33452e-06	55283.5	125841	95343	40810.9	15524.3	119017	12341.9	18971.6	80744	159434	172265	64524.7	44151	111623	80190.4	20777.9	702601	376280	206454	236049	50058.7	63909.2	66249.4	81532.4	0.818192	0.627666	0.53051	0.056078	0.555148	0.878567
643.7455++	2	643.746	0	MLOC_51340.2	VGSAADWSNHY	VGSAADWS[+80]NHY	118.68	AT5G43830.1	| Aluminium induced protein with YGL and LRDR motifs | chr5:17622593-17624239 REVERSE LENGTH=251	51.85	0.9995	6.53131e-06	1.179e-05	11676.4	19505.6	23934.8	48730.7	9259.64	32869.7	28030.4	9088.64	49436.8	137051	88512.3	91868.6	87929	39043.9	32582.1	10514.6	901850	250821	108726	54949.9	46031.3	9425.65	37262.8	25322.8	0.597928	0.485965	0.472019	0.487708	0.5768	0.295072
814.3794++	2	814.379	0	AK249847.1	HIWPLDSDGPVSPK	HIWPLDSDGPVS[+80]PK	117.33	AT1G49520.1	| SWIB complex BAF60b domain-containing protein | chr1:18329736-18331691 FORWARD LENGTH=372	49.61	0.9995	1.09396e-05	1.87959e-05	83910.3	128351	60372.2	125162	41129.8	83309	30674.1	185566	42282.9	32862.1	84408.1	49671.5	64254.1	73569.8	266851	90852.8	49029.6	45007.4	63079	23185.8	34540.1	28225.9	258574	67816.8	0.781727	0.520032	0.840054	0.490366	0.21692	0.208133
866.4067++	2	866.407	0	MLOC_81766.1	VSQAEVSPEVLNHSR	VSQAEVS[+80]PEVLNHSR	119.89	AT5G42920.2	THO5, AtTHO5 | THO complex, subunit 5 | chr5:17206310-17209522 REVERSE LENGTH=819	47.65	0.9995	1.71791e-05	2.84631e-05	64643.7	20261.8	36285	43023.2	25986.3	80877.5	39956.5	24952	30752.2	34096.6	28985.7	52907.7	59927.2	23122.3	44049.8	22083	70338.7	41843	62847.6	67632.8	17437.6	21308.1	20831.4	36030.7	0.236782	0.492364	0.962759	0.775607	0.975422	0.669507
752.3638++	2	752.364	0	AK370327	TSLPAQSPNNPLGK	TSLPAQS[+80]PNNPLGK	119.56	AT5G08440.1	| unknown protein; FUNCTIONS IN: molecular_function unknown; INVOLVED IN: biological_process unknown; LOCATED IN: pl	47.42	0.9995	1.81134e-05	2.98748e-05	76054.2	61406	59950	55219.7	61183.2	88212.8	63763.7	49707.6	64018.6	74728.4	47247.6	107988	126968	65848.5	71255.1	46712.2	159345	108899	178218	61945.8	32150.7	51472.1	91783.1	37612.6	0.639261	0.933315	0.522113	0.884803	0.947731	0.416262
765.8187++	2	765.819	0	MLOC_32662.1	GSFGYLDPEYFR	GS[+80]FGYLDPEYFR	119.76	AT3G51550.1	FER | Malectin/receptor-like protein kinase family protein | chr3:19117877-19120564 REVERSE LENGTH=895	46.77	0.9995	2.10378e-05	3.41202e-05	120663	45676.2	81159.4	35480.2	29914.3	61584.1	70324.6	10945.9	333365	72376.8	54363.5	53962.9	76103.7	21336	25148.5	60746.1	81397.1	82194.5	82300.4	103777	51124.3	56098.1	30055.4	25848	0.293005	0.311257	0.293881	0.763715	0.627641	0.391655
545.7445++	2	545.744	1	MLOC_18233.1	AASYDDIKK	AAS[+80]YDDIKK	101.86	AT3G04120.1	GAPC, GAPC-1, GAPC1 | glyceraldehyde-3-phosphate dehydrogenase C subunit 1 | chr3:1081077-1083131 FORWARD LENGTH=338	43.25	0.9995	4.73151e-05	7.09727e-05	21940.3	14212.5	10962	24072.8	9099.14	15588.7	49252.9	18195	23038.9	53006.2	140171	678733	1167.37	12390.7	292832	180103	43952.4	83367.2	23912.5	2.90292e+06	23588	532095	25188.3	1.15837e+06	0.435609	0.562357	0.310726	0.416952	0.324302	0.341372
1021.1749+++	3	1021.17	1	MLOC_62056.2	TADAPAAAAVAPPAREPAAAAPAAAAAAAGASPSK	TADAPAAAAVAPPAREPAAAAPAAAAAAAGAS[+80]PSK	114.35	AT4G11420.1	EIF3A, ATEIF3A-1, EIF3A-1, ATTIF3A1, TIF3A1 | eukaryotic translation initiation factor 3A | chr4:6947834-6952053 REVE	210.14	0.9994	9.68278e-22	7.73267e-19	1.11404e+06	984606	35169	114510	1.16592e+06	1.18905e+06	40595.9	205139	417713	291881	574294	147504	381254	736861	1.04549e+06	35599.4	156510	194226	56948.7	115824	42572	60882.7	54607.3	19689.2	0.860437	0.385014	0.266219	0.795325	0.766285	0.32011
795.0408+++	3	795.041	0	MLOC_71198.1	SLSLDAAFFDGLALQGGGGGGAGHK	SLS[+80]LDAAFFDGLALQGGGGGGAGHK	105.08	AT1G43700.1	VIP1, SUE3 | VIRE2-interacting protein 1 | chr1:16484352-16486017 FORWARD LENGTH=341	158.26	0.9994	1.49279e-16	1.06442e-14	121620	150791	103551	62319.9	76606.9	46929.8	56969.3	84062.3	56981.6	84125.9	162655	44290.4	105209	49663.9	25411.4	20219.6	117690	54305.4	82823.2	7235.3	44786.6	23046.8	94438.7	43705.4	0.951071	0.618672	0.105224	0.207335	0.575669	0.380311
733.2989+++	3	733.299	0	AK355067	ETAEAGHASHSPTEEFFDR	ETAEAGHASHS[+80]PTEEFFDR	119.93	AT2G33490.1	| hydroxyproline-rich glycoprotein family protein | chr2:14183552-14187666 FORWARD LENGTH=623	128.52	0.9994	1.40605e-13	2.6735e-12	136832	168633	131003	192696	187810	206048	80947.3	164537	345001	227942	231620	558664	198005	195832	113856	57162.4	487652	527420	762485	431924	82529.9	69214.6	160388	126047	0.926188	0.829372	0.662971	0.988266	0.449816	0.467677
1052.4413++	2	1052.44	0	AK366557	GEDAGDPSVAYGDSTTGISPK	GEDAGDPSVAYGDSTTGIS[+80]PK	119.56	AT5G20280.1	ATSPS1F, SPS1F | sucrose phosphate synthase 1F | chr5:6844994-6849997 REVERSE LENGTH=1043	116.49	0.9994	2.24388e-12	2.72335e-11	65135.3	84870.9	68843.1	23425.1	67907.6	245828	256821	78673	87100.2	37214.5	87878.7	97086.9	43840.2	175338	323952	52597.5	96982.3	96844	124910	96396.1	17481.3	17148.1	84656.1	95192.2	0.671126	0.608669	0.720778	0.274771	0.133285	0.188709
798.3867+++	3	798.387	1	MLOC_74793.3	LRPGDEERSLSEAITGAVQER	LRPGDEERS[+80]LSEAITGAVQER	119.56	-	-	111.65	0.9994	6.83912e-12	7.13018e-11	158160	140103	129602	30509.3	103673	104199	152500	22491	80532.7	74831.1	246907	52179.7	95350.2	122721	220219	50174.6	49142.6	44283.8	122113	32580.5	26404.1	49668.3	154831	19085.4	0.838655	0.267974	0.224634	0.639717	0.05555	0.233405
1031.4724++	2	1031.47	0	MLOC_67838.1	SAEAFSGLSQEGSAALISEK	SAEAFSGLS[+80]QEGSAALISEK	119.42	AT1G27430.1	| GYF domain-containing protein | chr1:9521045-9526928 REVERSE LENGTH=1492	106.11	0.9994	2.44906e-11	2.12128e-10	437668	349809	290856	67548.2	400115	512215	455628	344939	298962	57009.2	255351	35832.8	217174	199898	468367	129100	77856	29006	52424.5	36014.6	80230	53293.1	478055	207245	0.452653	0.61442	0.166071	0.899002	0.127258	0.96453
966.9588++	2	966.959	0	MLOC_64063.2	NLPLHATPSQLEEEFK	NLPLHATPS[+80]QLEEEFK	119.89	AT3G25150.1	| Nuclear transport factor 2 (NTF2) family protein with RNA binding (RRM-RBD-RNP motifs) domain | chr3:9157161-91593	102.5	0.9994	5.62341e-11	4.35161e-10	326141	280846	123023	143901	276454	276196	105983	91578.8	176598	261890	315854	164899	292999	247566	186502	58222	105384	60725	48847.1	112333	122923	48421.9	61567.5	72918.9	0.988086	0.722261	0.449397	0.685707	0.18279	0.104442
562.9247+++	3	562.925	1	AK363748	RDSFSAVQPGNVSSR	RDS[+80]FSAVQPGNVSSR	119.65	AT4G26750.1	| hydroxyproline-rich glycoprotein family protein | chr4:13475848-13478382 REVERSE LENGTH=421	102.13	0.9994	6.1235e-11	4.70214e-10	93422.6	233474	441333	414250	163349	217965	422455	243011	129803	203812	382218	443680	225461	251717	419397	172161	275068	311960	444635	259173	110986	214566	456499	346651	0.28349	0.0491217	0.0812418	0.222335	0.0170015	0.244625
650.7368++	2	650.737	0	AK371016	MGGFGGDSFSSR	M[+16]GGFGGDS[+80]FSSR	119.92	AT4G38710.1	| glycine-rich protein | chr4:18078141-18080002 REVERSE LENGTH=452	100.05	0.9994	9.88553e-11	7.06135e-10	26394.3	123875	132409	185379	11278	82743.3	116941	44935.8	81941.5	147052	214575	149422	52497	103177	142315	17501.5	108812	164280	439125	104553	50843.3	40470	109668	50880.4	0.114316	0.183495	0.115383	0.201588	0.0148077	0.981196
890.8753++	2	890.875	0	MLOC_59585.1	GQESNLQHSLSCNAR	GQESNLQHSLS[+80]C[+57]NAR	119.02	AT1G17210.1	ATILP1, ILP1 | IAP-like protein 1 | chr1:5880502-5884657 REVERSE LENGTH=958	97.09	0.9994	1.95434e-10	1.24461e-09	199437	154445	130491	301010	418147	60759.2	220627	80636.7	441954	171665	438035	236299	387717	72729.9	147907	21636.5	1.24975e+06	365644	212052	229019	690729	68423.4	197767	418549	0.343288	0.379192	0.360027	0.0464454	0.0881172	0.129614
876.9502++	2	876.95	0	MLOC_72762.2	VQNSFSPLNALIEIK	VQNSFS[+80]PLNALIEIK	98.17	AT3G48050.2	| BAH domain ;TFIIS helical bundle-like domain | chr3:17734270-17739412 REVERSE LENGTH=1613	97.03	0.9994	1.98153e-10	1.25591e-09	36756.5	6761.6	24301.2	2731.39	37607.1	27252.9	20581	5875.19	15246.9	14196.2	8645.2	3910.97	31529.7	19472.4	14257.5	7647.32	21458.1	9614.37	16774.2	11000	30727	10816.6	8753.68	11712.5	0.168283	0.386528	0.114213	0.113989	0.0189462	0.00293077
1007.4807++++	4	1007.48	0	MLOC_61155.2	SSIKPHYNPFASTFETDPTLDISPIQSPNAVESASAK	SSIKPHYNPFASTFETDPTLDISPIQS[+80]PNAVESASAK	119.97	AT3G26850.2	| histone-lysine N-methyltransferases | chr3:9896541-9897415 REVERSE LENGTH=265	90.67	0.9994	8.57038e-10	4.35943e-09	35476.5	38438.4	32542.9	8714.89	35670.3	38966.5	17948.8	13591.2	28642.5	21569.5	37299.7	20978	126333	28338.4	30202.9	6318.98	36341.3	35444.3	34967.7	37396.4	34128	13491.6	39332.3	16188	0.798518	0.639815	0.327576	0.34503	0.364395	0.223647
884.4178+++	3	884.418	0	MLOC_78759.1	SNNQTATGLQSPLSDPFYVQYLK	SNNQTATGLQS[+80]PLSDPFYVQYLK	118.67	AT2G29200.1	APUM1, PUM1 | pumilio 1 | chr2:12549483-12553185 REVERSE LENGTH=968	84.21	0.9994	3.79315e-09	1.60106e-08	12316.9	17829.5	78270.3	22984	28445.4	21786.6	35723.9	45345	177593	10693.7	66091.4	11563.8	92357.5	30520.2	37338.7	19797.6	124922	42552.6	28621.2	8462.08	116500	54531.4	30467.5	44061.9	0.243652	0.451617	0.20535	0.261002	0.232683	0.261328
875.8878++	2	875.888	0	MLOC_60993.2	FGSGTSAEGLYSPELR	FGSGTSAEGLYS[+80]PELR	119.84	AT3G16630.2	ATKINESIN-13A, KINESIN-13A | P-loop containing nucleoside triphosphate hydrolases superfamily protein | chr3:5662660-	78.42	0.9994	1.4388e-08	5.06178e-08	168594	190099	57365.7	56123.9	65407.8	152438	106669	33614.3	374916	130604	94198.6	21165.9	37822.9	152438	31699	33435	177430	163791	302010	636717	117301	107318	66875.4	66704.3	0.374491	0.445222	0.992245	0.104621	0.882897	0.378615
1002.4519+++	3	1002.45	1	MLOC_51141.6	GLTGTSKDEFESSGHVSPDNSSALLFDK	GLTGTSKDEFESSGHVS[+80]PDNSSALLFDK	118.2	AT4G17330.1	ATG2484-1, G2484-1 | G2484-1 protein | chr4:9689263-9697172 REVERSE LENGTH=2037	73.44	0.9994	4.52898e-08	1.38896e-07	115495	77348.2	176887	67223.1	123324	113807	84720.1	102781	73239.6	52457.2	88240.6	67540.1	74690.7	72003.7	82745.5	55142	186459	47213.2	147848	100781	32904.1	23604.2	96519.4	95059	0.194096	0.784327	0.31344	0.858397	0.717634	0.822206
708.3340++	2	708.334	0	MLOC_13881.1	APPVPPPPEGSYK	APPVPPPPEGS[+80]YK	119.74	AT5G24130.1	| unknown protein; FUNCTIONS IN: molecular_function unknown; INVOLVED IN: biological_process unknown; LOCATED IN: mi	70.65	0.9994	8.60994e-08	2.45743e-07	47967.8	120775	142397	173331	33124.2	121243	133852	191559	41716.7	92813	173440	97821.2	24648.3	65394.6	181194	71172.3	55412.3	131327	202026	144184	39753.9	49472.2	130980	200908	0.0317178	0.0196241	0.0563531	0.172882	0.0204149	0.100854
623.7663++	2	623.766	0	MLOC_55540.1	SSLYHGYSPR	SSLYHGYS[+80]PR	118.18	AT5G46190.1	| RNA-binding KH domain-containing protein | chr5:18723435-18725834 REVERSE LENGTH=644	60.13	0.9994	9.7051e-07	2.12926e-06	264521	255953	173684	331747	318799	158231	283627	487810	331226	396867	322324	479696	330365	213124	173075	281813	91296.8	308290	263109	700442	161988	197741	419941	534201	0.348874	0.792388	0.122453	0.290755	0.823407	0.181242
549.7576++	2	549.758	0	MLOC_4715.1	VQSISDLEK	VQS[+80]ISDLEK	119.88	AT3G19770.1	ATVPS9A, VPS9A, VPS9 | Vacuolar sorting protein 9 (VPS9) domain | chr3:6866916-6869114 FORWARD LENGTH=520	55.86	0.9994	2.59418e-06	5.10525e-06	54575.6	90938.3	358456	100786	107403	206021	42227.3	103528	75565	171013	171194	325083	423875	199972	194502	99860.4	868905	1.11109e+06	789155	1.30628e+06	91232	125413	75167.3	445655	0.787527	0.764153	0.629933	0.810637	0.47199	0.958803
694.3289++	2	694.329	0	AK248363.1	LLSQDTFQEVK	LLS[+80]QDTFQEVK	102.52	AT1G29370.1	| Kinase-related protein of unknown function (DUF1296) | chr1:10278080-10283024 REVERSE LENGTH=831	52.6	0.9994	5.49541e-06	1.00611e-05	57750.3	46815.8	128545	32460.1	35417.3	108386	124556	23034.5	39726	88920.1	33770.5	156309	38013.9	85904.2	73924.2	11378.6	72882.2	56606.6	210954	259413	87285.8	94250.1	71917.8	24143.1	0.67674	0.323606	0.297304	0.142849	0.226684	0.188833
585.7705++	2	585.77	0	MLOC_44066.1	CQTLISGGVR	C[+57]QTLIS[+80]GGVR	119.57	AT3G46920.1	| Protein kinase superfamily protein with octicosapeptide/Phox/Bem1p domain | chr3:17280430-17284857 REVERSE LENGTH=	51.68	0.9994	6.79204e-06	1.2222e-05	136948	124949	58750.4	120872	197374	171615	65177.4	67312.8	187666	258649	130964	195688	402880	197346	149020	42359.1	261318	184043	118069	398940	142604	49058.9	39461.9	72665.2	0.91555	0.116631	0.680524	0.321819	0.197911	0.143948
851.4095+++	3	851.41	0	AK363255	SPTGSTTSALLQQYELHQQQVR	SPT[+80]GSTTSALLQQYELHQQQVR	119.84	AT5G63190.2	| MA3 domain-containing protein | chr5:25346145-25348563 FORWARD LENGTH=702	198.61	0.9993	1.37721e-20	6.11022e-18	1.12972e+06	887341	782659	1.54292e+06	1.09398e+06	1.05158e+06	412691	483536	690394	375930	580121	535627	461916	639408	474981	348077	150926	123360	344627	169166	161959	273441	545203	380237	0.62731	0.803496	0.865104	0.831764	0.76461	0.605386
928.4435++	2	928.443	0	MLOC_33323.1	EVLSPTASVSAQSVSSAR	EVLS[+80]PTASVSAQSVSSAR	119.3	AT5G49830.1	EXO84B | exocyst complex component 84B | chr5:20250803-20254766 REVERSE LENGTH=752	125.35	0.9993	2.91743e-13	4.95714e-12	27665.7	43432.2	60953.1	49920.3	29881.6	128355	67201.6	92255.9	21769.4	77441.1	35041.6	67109.6	171143	159543	59181.9	65088.4	64052.3	28982.7	122513	283652	38222	8792.51	6054.25	11679.6	0.578603	0.35227	0.336653	0.787029	0.547543	0.694124
913.4164++	2	913.416	0	MLOC_17197.3	VLSPSESYIHELDEK	VLS[+80]PSESYIHELDEK	117.37	AT1G09430.1	ACLA-3 | ATP-citrate lyase A-3 | chr1:3042135-3044978 FORWARD LENGTH=424	101.41	0.9993	7.2277e-11	5.42485e-10	39934.7	100194	61591.5	1.12356e+06	44832	93016.2	52880.5	50926.9	874518	529641	36598.8	117174	38073.1	111594	42344.8	66164.6	96107.2	57267.4	100031	56115.2	29919.5	188657	99159.3	62608.1	0.749945	0.421472	0.841692	0.0873018	0.269546	0.0385046
815.9031++	2	815.903	0	MLOC_61844.1	AGGSGSGGLPLYVFLR	AGGSGS[+80]GGLPLYVFLR	98.15	-	-	101.03	0.9993	7.8886e-11	5.8224e-10	62689.9	17454.7	38365.2	57532.8	63264.2	55363.9	41661.7	18628.9	15435.6	23968	13658.6	17524.2	25313.8	12555.5	19308.9	12135.8	27723	37105.6	15794.4	20588.6	24911.7	8642.55	21475.1	30568.3	0.611853	0.491294	0.870166	0.575251	0.528895	0.335251
1151.8678+++	3	1151.87	0	MLOC_67581.1	LMPEPTAVALLYAQQQQQLMHDNMGSGIEK	LM[+16]PEPTAVALLYAQQQQQLMHDNM[+16]GS[+80]GIEK	119.84	AT2G32120.2	HSP70T-2 | heat-shock protein 70T-2 | chr2:13651720-13653411 REVERSE LENGTH=563	98.12	0.9993	1.5417e-10	1.02771e-09	448357	368780	679508	20562.5	265268	516865	249468	1.03859e+06	148238	108189	312151	366379	241652	473481	599363	416754	57684	82359.7	71956	101196	61250.1	81753.3	660525	742373	0.845752	0.566472	0.74858	0.385875	0.160088	0.104402
840.8723++	2	840.872	0	MLOC_64351.2	MSGLLQSFTMTPQK	M[+16]SGLLQSFTM[+16]T[+80]PQK	118.99	AT1G64110.3	| P-loop containing nucleoside triphosphate hydrolases superfamily protein | chr1:23796887-23801255 REVERSE LENGTH=8	92.51	0.9993	5.61048e-10	3.0563e-09	233911	330779	202668	670454	56531.7	189296	168162	252019	137663	126741	284044	512968	86825.3	258139	315196	118803	227818	164782	225457	457534	92666.1	53461.8	371180	271849	0.923025	0.410853	0.0393266	0.285685	0.078778	0.11089
1095.4254++	2	1095.43	0	MLOC_15148.1	SAEEDASEEEYGYEFVQK	SAEEDAS[+80]EEEYGYEFVQK	114.25	AT1G07210.1	| Ribosomal protein S18 | chr1:2215320-2216668 FORWARD LENGTH=261	87.9	0.9993	1.62181e-09	7.61869e-09	54443.9	28489.2	42220.7	48887.4	35093.6	37035	22858.8	25672.8	29440.1	51327	57694.8	55404.9	25397.2	21262.9	33743.6	14994.3	100071	30718.5	55897.3	103100	29723.8	6606.61	12158.9	162338	0.380315	0.701984	0.789846	0.456874	0.405147	0.511747
754.8195++	2	754.82	0	AK366120	FFAGNFANSPNSR	FFAGNFANS[+80]PNSR	117.71	AT5G21160.2	| LA RNA-binding protein | chr5:7198817-7203879 REVERSE LENGTH=832	85.36	0.9993	2.91072e-09	1.26883e-08	150073	415705	252651	260902	684661	434204	478894	823516	303736	650798	286189	307233	586097	739170	872787	279958	162383	246137	310689	204985	178570	308860	938600	501502	0.209682	0.27395	0.429901	0.959873	0.276352	0.829601
1058.5399++	2	1058.54	0	AK248356.1	TVAVPVSPISVEPPNFGTPK	TVAVPVS[+80]PISVEPPNFGTPK	119.88	AT3G12640.1	| RNA binding (RRM/RBD/RNP motifs) family protein | chr3:4014455-4017675 FORWARD LENGTH=638	82.38	0.9993	5.78096e-09	2.29002e-08	68028.8	208978	6679.74	14568	65940.9	45587.9	22420	48837.8	18826.1	8450.76	35899.9	12601.8	11986	26298.5	13766	29220.6	15188.5	38145.7	18357.9	10423.1	8265.06	19666.6	18276.6	47344.9	0.51223	0.546445	0.335452	0.937545	0.630419	0.574807
700.3394++	2	700.339	0	MLOC_79165.2	ITVGDVLSDATTK	ITVGDVLS[+80]DATTK	118.55	AT3G22490.1	| Seed maturation protein | chr3:7969785-7970738 REVERSE LENGTH=262	81.22	0.9993	7.55092e-09	2.90191e-08	98941.1	143773	408660	163085	84764.9	89688.9	214365	92668.9	198897	233909	235452	228275	202962	92039.5	171219	87174.7	181829	169666	277961	349517	68266.4	62114.6	194911	62563.7	0.619459	0.0929498	0.259329	0.480612	0.232617	0.475115
531.2312++	2	531.231	0	AK366366	LSFSPESSK	LSFS[+80]PESSK	118.99	AT4G33060.1	| Cyclophilin-like peptidyl-prolyl cis-trans isomerase family protein | chr4:15948535-15951954 FORWARD LENGTH=504	60.93	0.9993	8.07235e-07	1.80072e-06	79211	55061.3	100623	100275	134787	61564.8	72728.7	51385.5	114078	126521	117644	126815	122979	54585.8	32470	27768.5	34312.3	218329	189682	451733	24632.8	25117.2	27972.8	41077	0.388789	0.191241	0.32206	0.328015	0.317865	0.268034
671.9737+++	3	671.974	0	AK370392	YQRPEFDGADSPVSIPR	YQRPEFDGADS[+80]PVSIPR	119.84	AT2G47630.1	| alpha/beta-Hydrolases superfamily protein | chr2:19534637-19536911 FORWARD LENGTH=351	58.19	0.9993	1.51705e-06	3.18485e-06	66887.3	16330.3	218504	180760	30333.2	45120.3	373617	22190.8	52449.8	47532.4	22821.2	49638.6	120227	68410.1	60028.3	58215.7	80464.4	120066	87586	169853	59054.3	125101	56684	74464	0.883062	0.536142	0.258716	0.803434	0.478946	0.593857
696.6513+++	3	696.651	1	AK249995.1	RLSGLDAEHEAIHSASTDV	RLS[+80]GLDAEHEAIHSASTDV	110.81	AT5G57410.3	| Afadin/alpha-actinin-binding protein | chr5:23264351-23267641 REVERSE LENGTH=391	57.3	0.9993	1.86209e-06	3.8169e-06	92585.5	90717.5	21749.1	60621.5	111812	96411.5	31911.1	21437.6	74884.2	95199.9	111067	47008.3	104892	82036.2	56297.7	21738.2	140875	161620	115984	293350	49049.2	23280.6	35827.7	26911.1	0.694882	0.623714	0.74368	0.52713	0.156361	0.0821735
833.4162+++	3	833.416	0	MLOC_36940.2	LVYVVQQPGAQQHFASPPPQAR	LVYVVQQPGAQQHFAS[+80]PPPQAR	119.76	AT3G52660.2	| RNA-binding (RRM/RBD/RNP motifs) family protein | chr3:19522598-19524735 FORWARD LENGTH=471	55.57	0.9993	2.77332e-06	5.41509e-06	81084.4	95049.6	80979.3	81242.4	148195	179906	103373	127573	46120.5	56055.1	129543	46411.8	171604	182491	160391	56085.7	45577.5	28824.5	88048.9	16196.8	38057.6	62218.9	162166	140472	0.922441	0.116533	0.692855	0.72309	0.667273	0.832706
864.9325++	2	864.932	0	MLOC_57581.1	GLIPSPVTPMQIMHK	GLIPS[+80]PVTPMQIMHK	119.7	AT3G60240.4	EIF4G, CUM2 | eukaryotic translation initiation factor 4G | chr3:22261842-22268295 FORWARD LENGTH=1727	44.41	0.9993	3.62243e-05	5.55254e-05	3721.99	3585.41	30012.8	8278	1917.76	73942	11922.1	14534.4	23533.2	5829.07	6239.33	15003.5	37880.5	17275	31294.5	66944.3	94544.6	52460.2	26792	8874.81	15131.5	14728.9	12116.3	17967.8	0.574966	0.563683	0.392899	0.495794	0.991976	0.510372
706.3576++	2	706.358	1	MLOC_63303.2	LSPLKEETVTSK	LS[+80]PLKEETVTSK	119.78	AT1G08820.2	VAP27-2 | vamp/synaptobrevin-associated protein 27-2 | chr1:2821810-2824412 REVERSE LENGTH=386	43.73	0.9993	4.23643e-05	6.42952e-05	25123.7	30020.8	58893.8	52428.2	35047.3	24383.9	41423.1	12602.4	79685.7	31065.4	21497.3	31802.8	42988.2	9956.37	15291.5	46141	106250	37927	64650.9	21359.3	28096.2	22965.1	29877.5	8128.88	0.260049	0.481294	0.302853	0.0812985	0.508369	0.412414
999.7835+++	3	999.784	0	MLOC_64063.2	EQEASPQPEPILSESVPRPNEEDDPK	EQEAS[+80]PQPEPILSESVPRPNEEDDPK	113.83	AT3G25150.1	| Nuclear transport factor 2 (NTF2) family protein with RNA binding (RRM-RBD-RNP motifs) domain | chr3:9157161-91593	41.25	0.9993	7.49894e-05	0.000107594	114109	77433.3	97085.6	64973.4	65682.5	101259	57627.2	70659.3	18167.8	25645.9	38806	10364.5	42903.3	62041	46663.8	25737	69131.9	41014.6	32284.3	62912.6	106449	22215.3	75708.9	56694.1	0.589052	0.769413	0.568589	0.760134	0.625185	0.432623
1197.3158++++	4	1197.32	0	MLOC_79165.2	TAEESVQGVQVPQASGGGFSAAVAMETAAAYNQAVGAVRPGQASDAATK	TAEESVQGVQVPQAS[+80]GGGFSAAVAMETAAAYNQAVGAVRPGQASDAATK	108.72	AT3G22490.1	| Seed maturation protein | chr3:7969785-7970738 REVERSE LENGTH=262	140.8	0.9992	8.31764e-15	2.74482e-13	35616.7	12073.7	42845	484.301	34217.7	89301.5	27938	8141.01	36510.8	10435.4	41699.5	10234.6	21516.1	33648.4	52828.2	11684.3	39961.7	45740.4	11684.9	7098.48	17756	17191	20709.8	12392.5	0.334237	0.658456	0.00998864	0.425439	0.483245	0.116246
1201.3145++++	4	1201.31	0	MLOC_79165.2	TAEESVQGVQVPQASGGGFSAAVAMETAAAYNQAVGAVRPGQASDAATK	TAEESVQGVQVPQAS[+80]GGGFSAAVAM[+16]ETAAAYNQAVGAVRPGQASDAATK	96.61	AT3G22490.1	| Seed maturation protein | chr3:7969785-7970738 REVERSE LENGTH=262	139.38	0.9992	1.15345e-14	3.65535e-13	79046.8	70071.3	32274.8	22422.7	10141	34401.4	21510	11837.8	29467	19113.7	58273.8	12889.9	13540	27435.8	28340.4	9385.63	24698.7	18025.8	29124.1	16224.1	23178	6400.76	21423.4	10503.6	0.74621	0.833339	0.26193	0.522725	0.170079	0.331533
761.0042+++	3	761.004	1	MLOC_9854.1	ATGSGNERAEGEGGVVIEPDEK	ATGS[+80]GNERAEGEGGVVIEPDEK	119.85	AT3G51810.1	ATEM1, GEA1, AT3, EM1 | Stress induced protein | chr3:19214818-19215461 FORWARD LENGTH=152	122.37	0.9992	5.79429e-13	8.89869e-12	170281	259536	251218	122074	293420	195657	151877	75644.5	135865	234701	309266	130676	233203	240511	133834	22726.8	228152	161799	279121	217380	33270.5	75045.1	171901	117667	0.383141	0.0490057	0.63508	0.872408	0.709438	0.302588
892.0713+++	3	892.071	0	MLOC_12181.1	SGNFDASLGNLDNVIGSSTAEEQLR	S[+80]GNFDASLGNLDNVIGSSTAEEQLR	94.61	AT3G20250.1	APUM5, PUM5 | pumilio 5 | chr3:7059098-7062660 REVERSE LENGTH=961	112.9	0.9992	5.12861e-12	5.49023e-11	25539.2	68328.3	63252.3	29127.5	36404.7	76248.4	34309.7	7861.03	103338	65231	75299.2	58788.2	80632.2	39309	58282.2	19724.9	108154	76849.8	70402.9	11754.8	65281.7	18237	30672.9	30243.6	0.773601	0.76194	0.267477	0.503638	0.295979	0.103338
847.3933++	2	847.393	0	AK252395.1	SADLGTEVGSPTGPAVR	SADLGTEVGS[+80]PTGPAVR	119.69	AT3G60600.1	VAP27-1, VAP, (AT)VAP, VAP27 | vesicle associated protein | chr3:22400537-22402408 FORWARD LENGTH=256	110.23	0.9992	9.48418e-12	9.46759e-11	63013.9	86193.2	130128	157099	55326.6	106856	146829	38523.5	93478.9	45876.6	117388	56297.3	315152	150704	174180	25278.8	71420.5	96018	101593	51805.4	25269.7	63651.2	133549	48938.2	0.997603	0.0460221	0.760022	0.818886	0.852273	0.414179
1035.0032++	2	1035	0	MLOC_75540.1	DYVAQPLPLTPAYVEQGK	DYVAQPLPLT[+80]PAYVEQGK	119.79	AT3G42170.1	| BED zinc finger ;hAT family dimerisation domain | chr3:14321838-14323928 FORWARD LENGTH=696	104.83	0.9992	3.28852e-11	2.73563e-10	46800.7	40108.7	56866.1	59126.3	2154.42	51247.2	48372.3	139256	12422.7	41198.4	18030.6	30959	15172.8	37990.1	56543.5	90861.9	34891.7	31130.4	25981.4	24346.4	18817.5	6874.27	75579.4	157408	0.621828	0.89394	0.675815	0.291775	0.0149234	0.0292784
824.6949+++	3	824.695	1	MLOC_70500.1	TPPVESVESEDEDGFPVSESKK	TPPVESVES[+80]EDEDGFPVSESKK	111.91	AT4G25340.1	FKBP53, ATFKBP53 | FK506 BINDING PROTEIN 53 | chr4:12959657-12962632 REVERSE LENGTH=477	99.78	0.9992	1.05196e-10	7.43448e-10	31433.9	30346.9	27755.4	837089	48632.1	35986.4	42043.6	518184	38447.6	35613	220853	560473	26920.9	64254.1	44819.6	40322.6	68819.4	75877.2	33367.5	72284.5	71785.9	25713.2	46238.2	23121.9	0.958255	0.536048	0.185975	0.708559	0.750272	0.467585
765.3571++	2	765.357	0	MLOC_44049.3	SVGSPMYGPLQIGK	SVGS[+80]PM[+16]YGPLQIGK	116.75	AT3G45090.1	| P-loop containing nucleoside triphosphate hydrolases superfamily protein | chr3:16490752-16494452 REVERSE LENGTH=7	76.53	0.9992	2.22331e-08	7.42902e-08	111743	103005	104233	96249	106995	174022	114939	62294.7	115275	100357	341960	106020	164098	113069	118982	49620.1	112712	62139.7	115709	135302	35037.5	19393.6	164687	64651.8	0.202694	0.439672	0.956859	0.998515	0.52701	0.369848
928.4197++	2	928.42	0	MLOC_53798.1	EIGGDSPAAATTAATVATTA	EIGGDS[+80]PAAATTAATVATTA	114.31	AT4G14800.1	PBD2 | 20S proteasome beta subunit D2 | chr4:8500398-8502058 FORWARD LENGTH=199	68.54	0.9992	1.39959e-07	3.79657e-07	201859	171588	140493	168232	265559	135881	145525	173376	115269	53236.7	154799	131421	112473	150847	133452	101393	125289	72605.7	129311	116047	61776.7	53794	174993	131677	0.368157	0.85336	0.795315	0.67577	0.946654	0.879365
795.9796+++	3	795.98	1	MLOC_60118.1	AKFDSEYDGSDLSGEEADNEK	AKFDSEYDGSDLS[+80]GEEADNEK	119.56	AT1G06720.1	| P-loop containing nucleoside triphosphate hydrolases superfamily protein | chr1:2060615-2067281 REVERSE LENGTH=114	68.27	0.9992	1.48936e-07	3.99129e-07	57504.9	27526.4	58715.4	113494	130903	67052.7	19467.3	10591.2	66964.2	58058.8	101092	182378	49636.1	323351	171256	9951.36	53566	243796	103152	106536	90268.4	372635	49871	36421.4	0.533808	0.200082	0.0928264	0.234705	0.864227	0.104337
741.0242+++	3	741.024	2	AK364822	RGSAAGGSGAASAASAVGGVGPNRR	RGS[+80]AAGGSGAASAASAVGGVGPNRR	107.03	AT5G59950.5	| RNA-binding (RRM/RBD/RNP motifs) family protein | chr5:24140235-24141504 FORWARD LENGTH=245	67.94	0.9992	1.60694e-07	4.27483e-07	80320.8	27243.3	66103.6	54668.5	6357.16	94602	122999	46789.9	60457.4	88352.1	83054.4	27068.4	27124	89734.6	121381	7577.12	63708.5	39171.8	108095	65231.7	66378.6	19812.3	44708.3	22566.3	0.488497	0.326766	0.234844	0.328914	0.136918	0.73984
681.7976++	2	681.798	0	MLOC_62633.1	GGSPTFQGAWFK	GGS[+80]PTFQGAWFK	119.48	AT4G25660.1	| PPPDE putative thiol peptidase family protein | chr4:13083677-13084989 FORWARD LENGTH=255	65.42	0.9992	2.87078e-07	7.17785e-07	69692.7	58008	109172	58009.5	33502.3	61071	43960.5	68942.1	102462	132385	152154	201099	83532.4	113150	111549	43453.2	1.25775e+06	231529	134612	261022	53861.3	35691.9	60007.5	77504.7	0.48351	0.470917	0.523163	0.663351	0.594238	0.745004
878.7439+++	3	878.744	0	MLOC_53435.4	HAAPAPAAGPAMAPDPASPAIGEFSPR	HAAPAPAAGPAMAPDPASPAIGEFS[+80]PR	102.69	AT5G40480.1	EMB3012 | embryo defective 3012 | chr5:16213361-16223982 FORWARD LENGTH=1923	61.62	0.9992	6.88652e-07	1.55619e-06	19343.6	12455.2	19438.6	11102.5	14506.9	22741.1	22739.5	44034.4	14995.3	14988.8	12563.1	12053.9	14188.9	11746.9	38662.6	64058.7	33920.5	23251.8	18820.8	25874.2	39287.7	8917.2	44754.1	15619.7	0.439538	0.443118	0.45299	0.472161	0.315824	0.337883
880.4317++	2	880.432	0	MLOC_81213.1	VLHPQLSGQMSPLTR	VLHPQLS[+80]GQM[+16]SPLTR	119.25	AT3G13300.1	VCS | Transducin/WD40 repeat-like superfamily protein | chr3:4304085-4309949 FORWARD LENGTH=1344	59.62	0.9992	1.09144e-06	2.37112e-06	637552	807360	484152	1.0135e+06	262507	335964	212880	44828.1	400239	774822	540279	1.04985e+06	538229	452873	204695	85603.4	364132	480651	655045	368170	241831	147049	319753	810652	0.20052	0.420703	0.285228	0.803121	0.425405	0.910595
552.2458++	2	552.246	0	MLOC_36653.1	FSIDMSPVK	FSIDMS[+80]PVK	118.91	AT3G26560.1	| ATP-dependent RNA helicase, putative | chr3:9750122-9753719 REVERSE LENGTH=1168	58.71	0.9992	1.34586e-06	2.85852e-06	39464.4	30651.9	77221.4	26005.8	55149.8	69841.5	113189	70780.3	90057	220269	38503.6	91823.2	100506	99911.1	81415.5	56185	216509	67379.7	134166	207288	94941	59916.3	79365.9	71479.1	0.913571	0.627724	0.931523	0.733498	0.694299	0.369355
564.2659++	2	564.266	0	MLOC_20909.2	GGFLSNSPLR	GGFLSNS[+80]PLR	113.51	AT5G07980.1	| dentin sialophosphoprotein-related | chr5:2549432-2554669 REVERSE LENGTH=1501	47.78	0.9992	1.66725e-05	2.76927e-05	86534.4	55392.1	115699	129262	88491.6	80063.4	132524	45685.8	75836.9	151058	86502	121193	179271	110437	67142.1	29185.3	143865	342776	690040	140066	80304.9	45993.1	70428.4	15433.2	0.450539	0.427138	0.326715	0.386309	0.544898	0.120629
734.8578++	2	734.858	0	AK376429	SLFDSVPGTPLQK	SLFDSVPGT[+80]PLQK	119.41	AT1G21630.1	| Calcium-binding EF hand family protein | chr1:7581457-7587796 FORWARD LENGTH=1218	47.39	0.9992	1.8239e-05	3.0057e-05	284928	156320	121300	68049.4	252983	208822	106266	41463.9	113078	175867	216280	49062.5	286513	180546	188644	17440	80526.9	76652	98568.3	118640	73403.2	61138.5	114232	50933.6	0.772445	0.858789	0.348988	0.547877	0.440642	0.129084
1079.4795+++	3	1079.48	2	MLOC_15650.1	RGANEEASSVHADEDLNGPYERSPNATAAK	RGANEEASSVHADEDLNGPYERS[+80]PNATAAK	118.85	AT3G21810.1	| Zinc finger C-x8-C-x5-C-x3-H type family protein | chr3:7684852-7688360 FORWARD LENGTH=437	134.6	0.9991	3.46737e-14	8.70767e-13	804333	3.14298e+06	1.69479e+07	2.05459e+07	1.11889e+06	1.20157e+06	782678	1.00602e+06	6.94221e+07	4.56339e+07	9.0023e+06	418377	575051	1.50697e+07	5.92798e+06	1.86262e+06	892027	3.55156e+07	3.78556e+06	1.07199e+06	3.50764e+06	7.76977e+06	2.04085e+06	6.68174e+06	0.877576	0.612091	0.562717	0.265719	0.556108	0.540792
1120.9778++	2	1120.98	0	MLOC_61457.1	QAFDEAISELDSLSEESYK	QAFDEAISELDSLS[+80]EESYK	119.98	AT3G02520.1	GRF7, GF14 NU | general regulatory factor 7 | chr3:526800-527915 REVERSE LENGTH=265	133.47	0.9991	4.4978e-14	1.07543e-12	135705	53470.4	53318.2	22254.2	28445.4	86862.4	41948.7	25486.6	27112.4	15529	23902.2	27563.1	18594.6	43570.3	57883.2	11282.2	66739.9	12743.9	26476	77111.9	105404	36584.1	37899.2	31968.8	0.287789	0.332491	0.414577	0.887687	0.877571	0.425563
829.8565++	2	829.857	0	MLOC_58431.1	EFGPSSSGPVSPTSSR	EFGPSSSGPVS[+80]PTSSR	119.95	AT3G06290.1	| SAC3/GANP/Nin1/mts3/eIF-3 p25 family | chr3:1899123-1907297 REVERSE LENGTH=1697	105.21	0.9991	3.01301e-11	2.54354e-10	94936.9	43354.7	36137.1	67219.7	105803	43229.8	77780.9	131191	43109.7	133666	56050.3	50996	68232.2	74429.6	40403.2	30422.7	68918	76475.2	27049.3	79747.9	27444.8	18422.9	60324	66401.1	0.644286	0.188396	0.872045	0.490594	0.788898	0.827214
833.3832++	2	833.383	1	MLOC_14236.4	RSPLADSDGSPSLQR	RSPLADSDGS[+80]PSLQR	110.62	AT3G13570.1	SCL30A, At-SCL30A | SC35-like splicing factor 30A | chr3:4429564-4431602 REVERSE LENGTH=262	96.26	0.9991	2.36592e-10	1.4624e-09	694238	758460	451818	286794	1.11193e+06	916068	255696	76999.4	740230	911219	635017	137466	1.00559e+06	986795	678146	15980.4	1.49758e+06	351571	567319	365580	97224.3	227497	428472	44956.2	0.398832	0.250312	0.117368	0.948731	0.496242	0.164909
1089.5094++	2	1089.51	1	AK356653	AASFKEDSYVAAALPSSDLR	AAS[+80]FKEDSYVAAALPSSDLR	119.63	AT3G51670.1	| SEC14 cytosolic factor family protein / phosphoglyceride transfer family protein | chr3:19168912-19170848 FORWARD	82.94	0.9991	5.08159e-09	2.05373e-08	43860.2	20668.2	32012.8	44984.2	12241	38597.6	40125.2	68348.5	32412.6	33784	12631.3	62638.1	59108.5	44406.1	27270.9	37972.8	81214.4	34071.4	58653.4	29937.7	20322.4	33511.9	45777.1	104579	0.273694	0.430471	0.729608	0.632166	0.688623	0.197427
1090.0434++	2	1090.04	0	MLOC_79938.1	VAPTPEQVAPSPEQVSPLPR	VAPTPEQVAPSPEQVS[+80]PLPR	119.76	-	-	70.42	0.9991	9.07821e-08	2.58186e-07	9355	15102.7	19173.3	7117.2	15902.4	19216.2	29644.8	33574.4	19095.7	11267.7	15827.3	18078.4	10441.2	23878.8	41662	23125.1	56421.9	98314.6	10585.2	12484.5	21712.7	4746.95	41488.2	166108	0.717099	0.463348	0.396296	0.992062	0.0246432	0.333995
675.9929+++	3	675.993	1	MLOC_63525.2	STPLSPLAESYDGSPLRR	STPLSPLAESYDGS[+80]PLRR	117.41	AT2G19810.1	| CCCH-type zinc finger family protein | chr2:8550419-8551498 FORWARD LENGTH=359	58.7	0.9991	1.34896e-06	2.86359e-06	312010	184039	117687	76805	217006	188603	71113.3	34563.2	138388	187633	181900	151565	166270	188670	117073	28550.2	141009	115456	124462	96247.9	79187.2	79422.3	107472	32816.2	0.631761	0.456642	0.285944	0.973961	0.321852	0.0936814
857.3741+++	3	857.374	1	AK361882	MEGASGDRLAAAEDEATTTPVPER	M[+16]EGAS[+80]GDRLAAAEDEATTTPVPER	110.85	AT3G03940.1	| Protein kinase family protein | chr3:1014412-1018244 REVERSE LENGTH=701	49.11	0.9991	1.22744e-05	2.09094e-05	34398.3	16216.6	18070.2	16047.1	21734.6	19011	26415.5	6548.54	43213.1	36004.9	17853	116208	52349.9	27104	62460.2	7793.11	43339.4	15201	37875.4	33529.1	17595.8	28116.8	11971.1	29577.6	0.137129	0.163075	0.677626	0.658866	0.879881	0.316294
664.2460++	2	664.246	0	AK248403.1	AMFYNDMSPR	AMFYNDM[+16]S[+80]PR	119.84	AT2G01190.1	| Octicosapeptide/Phox/Bem1p family protein | chr2:115023-117296 FORWARD LENGTH=720	46.87	0.9991	2.05589e-05	3.3425e-05	55556.3	70110.5	127741	23950.9	100066	139238	81495.4	167192	178040	187583	116130	104453	191754	139187	184952	85774.1	135105	154402	51862.9	134568	111055	115619	176756	94126.6	0.791597	0.610743	0.52207	0.930688	0.780051	0.66442
630.2814++	2	630.281	0	AK250482.1	YAGSPLSDLEK	YAGS[+80]PLSDLEK	113.66	AT2G29210.1	| splicing factor PWI domain-containing protein | chr2:12558156-12562168 FORWARD LENGTH=878	42.31	0.9991	5.87489e-05	8.64031e-05	56995.3	80289.2	80624.2	35006.9	40640.1	126702	67356.9	30010.6	201998	139437	115708	52754.2	229489	178966	117261	34924.9	214877	120657	141705	129966	121081	86953.9	85033.6	63001.4	0.493353	0.487354	0.239971	0.994532	0.548557	0.255651
502.5872+++	3	502.587	2	AK365099	DRLSPPKQTDLR	DRLS[+80]PPKQTDLR	111.19	AT2G02160.1	| CCCH-type zinc finger family protein | chr2:553407-555899 REVERSE LENGTH=669	39.01	0.9991	0.000125603	0.000170822	60923.4	35414.2	53739.3	101913	6136.82	86268.2	5825.52	87611.5	109849	48445.4	38293.3	89523.3	118866	76692.8	72909.9	277316	33326.7	4500.05	40888.8	145098	25072	18913.6	31794.6	20444	0.233	0.408651	0.213052	0.811418	0.763137	0.45103
917.7055++++	4	917.706	0	MLOC_57175.1	SPAVPVVVPVSPSPEVQPAGGDGAPKPQPEEQQQGK	SPAVPVVVPVSPS[+80]PEVQPAGGDGAPKPQPEEQQQGK	116.84	AT3G45980.1	H2B, HTB9 | Histone superfamily protein | chr3:16897492-16897944 REVERSE LENGTH=150	133.06	0.999	4.94311e-14	1.15426e-12	1.52993e+06	613976	435200	423090	702742	929311	391999	560176	274238	95433.3	299208	213035	179110	569341	563161	333089	123066	83371.8	186741	124402	34964.7	108627	593135	455324	0.512551	0.535134	0.482423	0.514624	0.426003	0.569266
833.7144+++	3	833.714	0	AK368552	DLAPPTDASDTPPTSDGPAALGGPAK	DLAPPTDASDT[+80]PPTSDGPAALGGPAK	112.97	AT3G11400.1	EIF3G1, ATEIF3G1 | eukaryotic translation initiation factor 3G1 | chr3:3578536-3580366 FORWARD LENGTH=294	107.46	0.999	1.79473e-11	1.63243e-10	115549	112512	126886	44376.2	87702.7	141071	85961.1	31148.9	108164	75566.6	101193	142035	361198	237403	83459.5	46966.4	373911	542330	499040	197948	212144	149942	196757	134810	0.815057	0.799277	0.544442	0.654197	0.377767	0.222308
767.7140+++	3	767.714	0	AK359592	FVQNQPAPQPVLSPEATELR	FVQNQPAPQPVLS[+80]PEATELR	117.32	AT5G21160.1	| LA RNA-binding protein | chr5:7199191-7203879 REVERSE LENGTH=826	83	0.999	5.01187e-09	2.03585e-08	46893.9	34352	43941.3	61348.8	41488.8	35653	54043.6	59393.5	50277.1	31841.9	50649.1	40099.2	68641.6	31477	44762.6	30427.7	68151.1	93188.6	87086.7	55994.3	39820.5	38945.2	38253.1	52850.4	0.933799	0.750137	0.793326	0.266683	0.719664	0.861894
670.3345++	2	670.334	1	MLOC_37462.1	KISNSENQLVK	KIS[+80]NSENQLVK	98.83	AT2G45540.1	| WD-40 repeat family protein / beige-related | chr2:18757881-18772229 REVERSE LENGTH=2946	80.19	0.999	9.57194e-09	3.54552e-08	63895.5	46101.6	28874.8	65652.5	6479.57	15118.8	23003.6	30277.3	55462.7	18856.8	39734.3	22694	39740.7	24067.7	21898.3	18174.8	147476	35011.5	20961.3	35332.8	23812.8	14472.5	32999.5	15935.6	0.208927	0.186475	0.274558	0.642783	0.821669	0.875298
801.8798++	2	801.88	1	MLOC_30711.1	GRFSVTSENVDLAK	GRFS[+80]VTSENVDLAK	118.81	AT4G10730.1	| Protein kinase superfamily protein | chr4:6609793-6614786 REVERSE LENGTH=711	74.56	0.999	3.49945e-08	1.11164e-07	42655.4	52082.1	74685.7	90298.5	46358	47649	87750.2	286840	481262	83164.5	50595.3	195160	76366	66781.3	68505.7	50700.9	86195.5	41587	37932.9	167012	242597	18124.6	55319.6	121966	0.410864	0.398581	0.748494	0.341185	0.493877	0.75746
902.0710+++	3	902.071	0	AK354470	STENNVELPIVEESEPIDHTDTR	STENNVELPIVEES[+80]EPIDHTDTR	118.07	AT1G29370.1	| Kinase-related protein of unknown function (DUF1296) | chr1:10278080-10283024 REVERSE LENGTH=831	68	0.999	1.58489e-07	4.2218e-07	97974.9	64445.5	76515.2	52155.5	13897.6	42040.7	30731.5	24629.5	24247.7	33891.1	25960.6	19996.4	29865.1	25249.9	31215.4	17112.3	42916.3	40270.1	36128.4	41681	37587.2	16817.5	26751.6	17457.8	0.747922	0.764615	0.551089	0.933724	0.763536	0.423156
803.3486++	2	803.349	0	MLOC_54346.5	ITSGDMVMASPVSAK	ITSGDM[+16]VM[+16]AS[+80]PVSAK	106.1	AT1G55860.2	UPL1 | ubiquitin-protein ligase 1 | chr1:20879900-20892910 REVERSE LENGTH=3681	67.57	0.999	1.74985e-07	4.60893e-07	5521	7181.33	65558.8	49658.7	29628.7	42065.4	60910.9	31007	71738.7	59561.9	90613.8	23182.4	14364.8	26161.8	25006.9	20709.8	99059.3	53062.8	158209	116118	37050.2	50034.9	34757	74535.1	0.600631	0.325126	0.921155	0.290331	0.372404	0.486282
819.9904+++	3	819.99	0	AK369821	ATHDVEAVASGGEEDEAFDDEGK	ATHDVEAVAS[+80]GGEEDEAFDDEGK	119.76	AT5G46840.1	| RNA-binding (RRM/RBD/RNP motifs) family protein | chr5:19005651-19007609 FORWARD LENGTH=501	67.24	0.999	1.88799e-07	4.93051e-07	30952.5	21233.3	23242.2	60254.9	31494.7	42076.2	10792.4	44652.7	102738	81344.2	1.01361e+06	87182.7	27994.2	74763.5	19293	8738.9	64732.6	71812.3	473773	45781	43777.1	10600.6	7970.73	18161.9	0.792625	0.267012	0.946973	0.714562	0.0342351	0.463825
770.7020+++	3	770.702	1	AK250647.1	VAAAEHISQFNEEARSPFVK	VAAAEHISQFNEEARS[+80]PFVK	111.78	AT2G19520.1	FVE, ACG1, MSI4, NFC4, NFC04, ATMSI4 | Transducin family protein / WD-40 repeat family protein | chr2:8456006-8459235	52.43	0.999	5.71479e-06	1.04435e-05	177752	110767	19769.9	7056.24	113645	29148.1	15448.4	12722.7	27334.8	31739.2	19590.7	80837.1	77146.7	44530.3	12417	16949.5	33997.4	35893.3	33487.4	29741.6	8914.44	7222.01	29685.2	16925	0.739147	0.377663	0.529585	0.347775	0.267614	0.238576
669.3161++	2	669.316	0	AK358522	SVFHPGSNLATK	SVFHPGS[+80]NLATK	119.85	AT2G33830.1	| Dormancy/auxin associated family protein | chr2:14309768-14310286 REVERSE LENGTH=106	45.11	0.999	3.08319e-05	4.81281e-05	44051.7	37514.8	54142.4	25670.5	19014.4	51911.6	41752.6	54302.5	77133.3	64461.8	75548.8	162914	121131	48262.6	72891.5	20641.2	97556.8	45433.2	43083.4	96519.3	37472.7	60284	88160.1	30033	0.307603	0.463239	0.655195	0.873114	0.829253	0.539231
815.3540+++	3	815.354	0	MLOC_55658.4	NALSNEPDEMFYSPLVEHQK	NALS[+80]NEPDEM[+16]FYSPLVEHQK	118.93	AT1G17210.1	ATILP1, ILP1 | IAP-like protein 1 | chr1:5880502-5884657 REVERSE LENGTH=958	40.63	0.999	8.64968e-05	0.000122086	609537	7467.21	19180.6	60549.5	10516.4	19047.3	38014.1	47059.8	35967.1	65298.5	33043.8	33182.2	24534.6	32622.7	30208.4	134205	67348.1	34809	79221.2	26708.8	44070.6	31378.2	8796.19	283122	0.393301	0.409031	0.400602	0.913432	0.960617	0.20632
742.7141+++	3	742.714	0	MLOC_65534.7	LGGAAVGLVITASHNPVGDNGVK	LGGAAVGLVITAS[+80]HNPVGDNGVK	119.74	AT5G18070.1	DRT101 | phosphoglucosamine mutase-related | chr5:5981117-5982787 FORWARD LENGTH=556	131.55	0.9989	6.99842e-14	1.54391e-12	155518	234180	171249	142651	62962.3	137749	162958	139291	96150.4	138675	257248	193155	65000	188713	205969	37616.4	119001	82180.5	217272	216475	26793.3	72105.1	193928	77468	0.61458	0.0563347	0.11773	0.152286	0.0046792	0.409324
846.9089++	2	846.909	0	MLOC_70787.2	LASYTGHAVAAADIPR	LAS[+80]YTGHAVAAADIPR	110.7	AT5G64270.1	| splicing factor, putative | chr5:25706909-25710718 FORWARD LENGTH=1269	91.99	0.9989	6.32412e-10	3.39411e-09	35102	203492	76201.9	98637.5	58182.8	61806.3	17325.3	27322.3	84260.2	75192.2	53462	59517.8	132664	31164	16014	68165	33773.8	18337.6	84777	98295.6	15119	6419.03	25623.9	54404.4	0.490157	0.362215	0.20089	0.4474	0.29102	0.658454
801.3475++	2	801.347	0	AK363503	MEDTGSIVNSPISR	M[+16]EDTGSIVNS[+80]PISR	119.97	AT1G04400.1	CRY2, FHA, AT-PHH1, PHH1, ATCRY2 | cryptochrome 2 | chr1:1185719-1187901 REVERSE LENGTH=612	91.75	0.9989	6.68344e-10	3.55352e-09	92179.4	53315.5	37252	60558.9	24103.9	37829.1	17004.8	17226.5	112503	150285	84146	407699	33999.4	42854.5	37854.2	20936.1	305496	476372	256534	83549.1	38671.6	40433	27937.5	31920.6	0.72216	0.67488	0.922373	0.21535	0.573395	0.24418
724.3910+++	3	724.391	0	MLOC_67239.1	LAIRPGSPESLQQLIEIAR	LAIRPGS[+80]PESLQQLIEIAR	119.68	AT1G02080.1	| transcription regulators | chr1:373335-386682 FORWARD LENGTH=2431	91.12	0.9989	7.72681e-10	3.99135e-09	50883.5	156643	76470.1	160857	44870.1	46631.2	31972.5	30201.9	364812	141449	361144	58935.4	106419	44194.3	204899	19710	122087	37782.7	42861.4	13180	30618.8	22785.6	37668.3	43813.3	0.577529	0.899143	0.433723	0.450262	0.664473	0.349724
680.8472++	2	680.847	0	MLOC_68802.2	ISVAVSPSPPAQK	ISVAVS[+80]PSPPAQK	119.97	AT3G25150.1	| Nuclear transport factor 2 (NTF2) family protein with RNA binding (RRM-RBD-RNP motifs) domain | chr3:9157161-91593	85.88	0.9989	2.58226e-09	1.14821e-08	82436.2	72660.4	126347	27449.4	14871.5	35832	18009.2	38614.7	39710.3	80341.7	343917	15224.3	68004.8	19810.5	168987	115549	22186.5	588487	959805	137902	12413.2	192801	40259.8	24422.2	0.365841	0.228893	0.804808	0.472188	0.475044	0.469418
832.8748++	2	832.875	0	MLOC_64351.2	MSGLLQSFTMTPQK	M[+16]SGLLQSFTMT[+80]PQK	119.72	AT1G64110.3	| P-loop containing nucleoside triphosphate hydrolases superfamily protein | chr1:23796887-23801255 REVERSE LENGTH=8	84.79	0.9989	3.31894e-09	1.42042e-08	66928.3	33527.8	37971.7	18406.8	15589.6	505653	174320	75419.6	57451.2	42156.9	30609.1	63779.5	99775.6	593755	448187	69202.2	80022	32172.8	68121.4	57337.4	28712.3	64440.2	377486	46306	0.0472161	0.186119	0.300225	0.176867	0.0803403	0.628627
743.8505++	2	743.851	0	MLOC_70775.3	GTPTAQQSSFGVVK	GT[+80]PTAQQSSFGVVK	119.84	-	-	73.49	0.9989	4.47713e-08	1.37411e-07	90713.9	53882.4	40956.2	65839.6	29253.3	29959.1	12755.7	54749.1	48585.2	47589.7	33662	48854.2	89668	73733.7	56928.3	50494.9	100841	79865.3	61552.9	101189	29580.2	59275.7	34761.6	89779.3	0.373843	0.150609	0.740047	0.852746	0.580734	0.558473
714.3501++	2	714.35	0	AK371016	VQPVSLASFNSAK	VQPVSLAS[+80]FNSAK	119.9	AT4G38710.1	| glycine-rich protein | chr4:18078141-18080002 REVERSE LENGTH=452	62.3	0.9989	5.88844e-07	1.35754e-06	85333.1	87337.6	228303	156956	232049	285643	440128	216258	54930.2	238324	392744	164889	647359	165207	595828	40716.7	496160	265956	994640	653206	58606.8	56220.7	444945	413976	0.931017	0.317633	0.639193	0.522329	0.424848	0.693811
520.7135++	2	520.713	0	AK251984.1	GGVDSPSWR	GGVDS[+80]PSWR	119.68	AT4G32180.1	ATPANK2, PANK2 | pantothenate kinase 2 | chr4:15537724-15543715 REVERSE LENGTH=901	62.07	0.9989	6.20869e-07	1.41908e-06	49801.9	25808.2	43900.7	28499.3	55941.4	53433.2	44029.4	28865.4	53573.2	67253.8	29991.8	99239.7	90021.2	40189.6	61329.5	10175.7	20167.2	33687.5	47539.5	46709	79278.8	43992.6	47765.5	42482.5	0.952483	0.958026	0.548196	0.113883	0.124416	0.0398905
535.2450++	2	535.245	0	MLOC_81766.1	LSVSHSFGR	LSVSHS[+80]FGR	110.43	AT5G42920.2	THO5, AtTHO5 | THO complex, subunit 5 | chr5:17206310-17209522 REVERSE LENGTH=819	58.91	0.9989	1.28529e-06	2.74153e-06	43942.3	53784.9	89698	165071	48890.6	56851.6	47844.1	83464.4	60772	61138.5	92619.4	217557	100725	49287.2	108112	38816	38904	122823	148227	185402	29272.2	26451.7	53064.9	33647.1	0.303656	0.0906462	0.0135673	0.574224	0.749801	0.791844
562.8018++	2	562.802	0	MLOC_66645.3	ISSTVIISPK	ISSTVIIS[+80]PK	119.88	AT2G24350.1	| RNA binding (RRM/RBD/RNP motifs) family protein | chr2:10361239-10364223 FORWARD LENGTH=537	45.83	0.9989	2.61216e-05	4.14561e-05	16607.5	7632.61	34463.9	22882.4	9849.93	14309.4	48944.9	52824.7	25074.5	8005.98	12922.2	77369.2	37592.5	28213.2	17440.8	38157.3	16075.6	22388.5	27393.5	27078.2	20707.4	3986.97	31868.5	46308.5	0.329656	0.501536	0.32133	0.548385	0.469991	0.0856144
944.4133++	2	944.413	0	MLOC_60930.4	MGSLHVSIPEPDPDDAK	MGS[+80]LHVSIPEPDPDDAK	119.39	AT1G55840.1	| Sec14p-like phosphatidylinositol transfer family protein | chr1:20873891-20876018 FORWARD LENGTH=325	44.27	0.9989	3.74111e-05	5.72346e-05	47967.8	113927	90255.2	153665	137483	120090	34533.3	84525.4	118704	59846.7	57440.4	62282.7	79663.4	81756.6	44746	35759.3	117681	47874.1	87230	87375.4	27188.7	12197.9	59021.7	86971.9	0.548435	0.586396	0.871512	0.836353	0.391978	0.753711
586.2491+++	3	586.249	0	MLOC_11124.1	AAFEDQENIHYSPR	AAFEDQENIHYS[+80]PR	119.52	AT3G50370.1	| unknown protein; FUNCTIONS IN: molecular_function unknown; INVOLVED IN: biological_process unknown; LOCATED IN: ce	43.37	0.9989	4.60257e-05	6.92466e-05	191528	197251	121890	170226	128933	220458	98602.6	134167	207215	254012	259172	367468	288071	256431	137733	146621	378171	295125	808136	268078	70073	46840.7	113216	154073	0.891889	0.59286	0.914601	0.902546	0.559726	0.814979
881.4196++	2	881.42	0	MLOC_61272.1	GLSVAVDSPTAAFHPGR	GLSVAVDS[+80]PTAAFHPGR	116.17	AT4G31160.1	DCAF1 | DDB1-CUL4 associated factor 1 | chr4:15145936-15152939 FORWARD LENGTH=1883	115.94	0.9988	2.54683e-12	3.00873e-11	92206.8	126421	165664	111631	135949	226056	309905	315256	76097.5	175906	279200	250457	180235	207417	217308	220974	257500	286362	210200	265966	106024	58495.8	320056	350792	0.520436	0.335129	0.440093	0.723881	0.0362867	0.0396144
828.3431+++	3	828.343	0	AK249986.1	DASHYNGDSSIGSPLQSDAYYR	DASHYNGDSSIGS[+80]PLQSDAYYR	119.42	AT2G26280.1	CID7 | CTC-interacting domain 7 | chr2:11188143-11190579 REVERSE LENGTH=567	88.35	0.9988	1.46218e-09	6.9423e-09	26913.3	7964.38	8522.83	18646.5	25591.9	92686.7	53310.8	40565.7	12620.4	60894.8	24665.5	47510.9	33641.6	83993.7	69610.8	15690.1	115871	56178.4	63724	54981.9	22917.8	21365.1	86589	39283.3	0.799328	0.644246	0.76983	0.230836	0.052527	0.659208
650.3083++	2	650.308	0	AK354668	NSPASFSGLLAR	NSPASFS[+80]GLLAR	119.68	AT2G25310.1	| Protein of unknown function (DUF2012) | chr2:10777436-10779123 REVERSE LENGTH=210	81.72	0.9988	6.72977e-09	2.62165e-08	80992.9	65952.3	108106	44605.7	19310.9	117943	71247.1	23548.2	93052	93337.1	99852.3	70021.7	111316	85448.2	105301	20055.2	75341.5	137451	101337	87473.4	40274.2	71967	72104.8	34111.4	0.53878	0.0751716	0.363277	0.378122	0.478855	0.384964
642.7394++	2	642.739	0	AK371016	MGGFGGDSFSSR	MGGFGGDS[+80]FSSR	119.55	AT4G38710.1	| glycine-rich protein | chr4:18078141-18080002 REVERSE LENGTH=452	79.4	0.9988	1.14815e-08	4.16401e-08	12033.8	25006.1	66538.3	20598.9	16367.6	41614.7	50124.9	18658.1	59068.9	81852.1	53935.3	50778.4	20110.7	49910.2	113659	11971.3	351508	190733	60552	59029.3	64803	16001.6	19106.6	33003.9	0.75536	0.527643	0.458151	0.917984	0.456234	0.531869
714.8240++	2	714.824	0	AK365266	SPSVGEFELVER	S[+80]PSVGEFELVER	119.61	AT3G11330.1	PIRL9 | plant intracellular ras group-related LRR 9 | chr3:3552330-3554695 REVERSE LENGTH=499	78.04	0.9988	1.57036e-08	5.4716e-08	156211	168376	231842	278348	173248	205966	140667	265254	184266	179239	143174	118154	147050	114464	110664	188155	110933	135699	165894	105371	103472	99932.7	184826	116773	0.699787	0.446147	0.804322	0.978556	0.898016	0.411888
633.2874++	2	633.287	0	MLOC_7019.5	TPTPGSYLGHR	T[+80]PTPGSYLGHR	119.39	AT4G35785.1	| RNA-binding (RRM/RBD/RNP motifs) family protein | chr4:16953211-16955127 REVERSE LENGTH=238	76.83	0.9988	2.07491e-08	6.97989e-08	67491.8	35920	63134.9	178860	46344.4	31041.7	81542.3	162063	102136	52510.1	56831.8	297955	198078	20394.8	53378.5	130573	93010.9	99594.3	106964	134912	79297.6	49457.7	133457	148144	0.334995	0.572942	0.144472	0.253782	0.755377	0.493502
784.8694++	2	784.869	0	MLOC_15650.1	ISSQVSDLDQQLR	ISSQVS[+80]DLDQQLR	113.43	AT3G21810.1	| Zinc finger C-x8-C-x5-C-x3-H type family protein | chr3:7684852-7688360 FORWARD LENGTH=437	69.14	0.9988	1.21899e-07	3.34761e-07	106920	45684.8	72843.2	195399	38727.8	61858	50767.4	73393.3	37899.4	46070.4	38818.4	64966.2	82631.9	49622.2	74102.6	49608.1	233542	226871	105124	264443	215141	68496	49769.6	86502.6	0.826265	0.46665	0.592991	0.430943	0.420238	0.515952
644.2739++	2	644.274	0	AK370251	GYSYSPSPPPR	GYSYSPS[+80]PPPR	119.92	AT1G55310.2	SR33, ATSCL33, SCL33, At-SCL33 | SC35-like splicing factor 33 | chr1:20630676-20632567 FORWARD LENGTH=220	61.86	0.9988	6.51628e-07	1.48175e-06	47682.2	42952.2	19890.7	12308.2	496792	87090	21731.1	30250.1	131980	60858.1	38118.6	160051	369566	56035.1	93091.6	28067.2	90265.5	44814.3	27878.7	110655	40861.2	95485.7	48298.6	40315.9	0.247066	0.132729	0.935695	0.24379	0.212845	0.185765
702.3501++	2	702.35	0	AK365897	LSPLSPVRPDDK	LSPLS[+80]PVRPDDK	119.8	AT3G55840.1	| Hs1pro-1 protein | chr3:20717530-20718816 REVERSE LENGTH=428	61.04	0.9988	7.87046e-07	1.75962e-06	63851.9	33369.1	219903	137120	18462.2	29461.4	137226	170006	42685.1	29761.9	23734.2	68833.4	242909	125591	148287	106083	85536.8	285941	33425.1	127654	94597.6	95505.6	68952.1	153859	0.603565	0.705581	0.151931	0.672801	0.994968	0.753775
1065.1840+++	3	1065.18	1	MLOC_56006.1	EPIVAEPEPEPAMIPVTVEPEESPRAVGK	EPIVAEPEPEPAM[+16]IPVTVEPEES[+80]PRAVGK	119.89	AT5G16880.2	| Target of Myb protein 1 | chr5:5549658-5551274 FORWARD LENGTH=407	60.46	0.9988	8.99498e-07	1.98656e-06	24007	48474.7	27842.3	72649.5	11729.6	45115.7	31128.3	37158.4	18561	10483.8	31595.1	34599.1	16898.1	26308.9	33932.3	19074.1	20938.9	14535.6	13801.9	48882.1	11060.3	13337.9	38907.8	54702.5	0.80976	0.623231	0.110398	0.251324	0.00527366	0.150955
884.0755+++	3	884.076	0	MLOC_53435.4	HAAPAPAAGPAMAPDPASPAIGEFSPR	HAAPAPAAGPAM[+16]APDPAS[+80]PAIGEFSPR	115.97	AT5G40480.1	EMB3012 | embryo defective 3012 | chr5:16213361-16223982 FORWARD LENGTH=1923	57.17	0.9988	1.91867e-06	3.92281e-06	100238	31661.5	27520	24843.3	17610.7	35142.2	16670.9	39323.5	30143.3	77150.4	43401.7	82158.5	25130.4	37215.9	27995.9	9326.23	52332.7	107624	32381.9	16256	146336	40765.7	34530.7	39358.1	0.734873	0.338335	0.535244	0.605856	0.47546	0.514485
872.7460+++	3	872.746	1	MLOC_67697.1	MDNLDRNSPAKPSPILNGADPASR	MDNLDRNS[+80]PAKPSPILNGADPASR	119.89	AT3G16830.1	TPR2 | TOPLESS-related 2 | chr3:5731709-5737531 FORWARD LENGTH=1131	46.48	0.9988	2.24905e-05	3.62116e-05	26195	48118.1	9641.67	15270.7	63906.2	60172	79783.2	53182	24420.7	19245.8	57849.4	85834.7	86679.8	62686.9	82341.6	66011.8	24609.8	34301.8	28870.3	54436.9	25240.6	22709.8	60954.6	58350.9	0.402162	0.665223	0.320119	0.679215	0.497417	0.977896
525.5827+++	3	525.583	2	MLOC_14236.4	RGYGGSPAHRSPPR	RGYGGSPAHRS[+80]PPR	98.33	AT3G13570.1	SCL30A, At-SCL30A | SC35-like splicing factor 30A | chr3:4429564-4431602 REVERSE LENGTH=262	46.44	0.9988	2.26986e-05	3.65319e-05	147016	4073.98	30361.7	4458.62	12586.5	35977.1	42404	12809.5	6729.22	7870.94	1157.81	73384.7	485.142	51063.2	15251	1.29641e+06	30848.2	13693.3	9250.62	133950	67739.8	45500.2	21843.3	37601.2	0.346503	0.391181	0.884175	0.50077	0.986094	0.424739
437.1969++	2	437.197	0	AK355067	SFSIPSR	SFS[+80]IPSR	119.81	AT2G33490.1	| hydroxyproline-rich glycoprotein family protein | chr2:14183552-14187666 FORWARD LENGTH=623	46.21	0.9988	2.39332e-05	3.82566e-05	38617.1	27386.8	79381.2	78975.9	52100.4	97133	81548.3	40998.3	56703	70857.5	70027.6	62248.3	1.09666e+06	80979.2	59728.6	229218	62660.3	204368	95100.2	96131.6	63970.5	44772.5	81335.3	89063.8	0.464312	0.0676004	0.117865	0.441558	0.441152	0.502549
603.7681++	2	603.768	0	MLOC_7518.1	SAISSYIEEK	S[+80]AISSYIEEK	109.71	AT1G14900.1	HMGA | high mobility group A | chr1:5138665-5139353 REVERSE LENGTH=204	43.45	0.9988	4.51856e-05	6.81367e-05	22253.3	23471.5	39328.8	68348.3	32669.9	34040.3	38925.7	24805.6	82541.4	116000	66053	75445.1	85855	24248.2	36079.9	571302	93970.1	363920	72705.6	271325	199105	20664.7	27089.8	23014.1	0.432003	0.804691	0.411892	0.247526	0.281707	0.647981
838.3497++	2	838.35	0	MLOC_6280.1	ELFMSLDEQGDSPK	ELFMSLDEQGDS[+80]PK	119.64	AT4G28200.1	| FUNCTIONS IN: molecular_function unknown; INVOLVED IN: RNA processing; LOCATED IN: intracellular; EXPRESSED IN: 22	39.61	0.9988	0.000109396	0.000150991	88086.3	14279.5	28749.5	23412.4	19368	65646.8	27952	36414.1	58136.5	49606.6	17317.3	316101	389892	111143	173602	38769.5	1.22993e+06	855653	71535.4	120891	750703	199201	63696.5	89186.8	0.768993	0.390706	0.520654	0.34773	0.300794	0.257694
1008.4248++	2	1008.42	0	MLOC_70862.3	NYSFSYDPSEVFVEPR	NYS[+80]FSYDPSEVFVEPR	119.93	AT5G65770.3	LINC4 | little nuclei4 | chr5:26311587-26315610 FORWARD LENGTH=1010	111.16	0.9987	7.65597e-12	7.7787e-11	38672.6	25145.6	108603	64990.4	46325.4	78243.9	66299.6	50584.9	21991.9	26262.4	55509.8	98804.4	27365.1	120132	51577.9	26819.8	104653	290220	152909	60408.9	50487.4	41608.4	66496.7	29982.2	0.587277	0.273447	0.555763	0.245929	0.103436	0.624728
607.2910+++	3	607.291	0	AK249986.1	SHSAILTDDIISPSAGR	SHSAILTDDIIS[+80]PSAGR	113.78	AT2G26280.1	CID7 | CTC-interacting domain 7 | chr2:11188143-11190579 REVERSE LENGTH=567	107.45	0.9987	1.79887e-11	1.62877e-10	330139	261419	128220	140391	187255	245587	253289	349406	244148	211797	380966	128464	279807	316266	256978	114123	196027	203912	239248	128678	162891	113088	236491	151241	0.546438	0.93551	0.0876274	0.842753	0.394299	0.955998
839.7548+++	3	839.755	0	AK355067	NTAFSSLVAHSAPLVPNSAPLTSR	NTAFSSLVAHS[+80]APLVPNSAPLTSR	119.84	AT2G33490.1	| hydroxyproline-rich glycoprotein family protein | chr2:14183552-14187666 FORWARD LENGTH=623	96.11	0.9987	2.44906e-10	1.5068e-09	170400	152755	109228	42409.4	161766	137313	67323	33340.6	85123	148528	169241	49021.8	103639	109038	81066.8	25574.1	45755.4	50431.2	95289.3	63380.1	66832.3	61543.8	104215	39165.3	0.757472	0.615177	0.320779	0.83339	0.465216	0.107638
575.7606++	2	575.761	0	AK372197	SASPDPELVR	SAS[+80]PDPELVR	117.39	AT2G29200.1	APUM1, PUM1 | pumilio 1 | chr2:12549483-12553185 REVERSE LENGTH=968	69.35	0.9987	1.16145e-07	3.19618e-07	350260	228742	120786	404201	307763	241082	67169.2	49235	343590	461551	196014	530476	260629	147719	46807.8	28402.8	299604	53297.8	230371	420267	58442.4	74017.4	81443.9	74854.7	0.55735	0.0540152	0.106191	0.58827	0.203265	0.178634
675.2439+++	3	675.244	0	AK356170	GGGGGGGGGCFSCGESGHFSR	GGGGGGGGGC[+57]FSC[+57]GES[+80]GHFSR	117.2	AT4G36020.1	CSDP1 | cold shock domain protein 1 | chr4:17043443-17044342 REVERSE LENGTH=299	64.52	0.9987	3.53183e-07	8.6413e-07	22485	39206.2	19505.2	10261.8	13427	91980.7	8754.75	3412.99	92312.8	197371	44427	22967.9	113308	53329.5	11539.4	3217.43	38805.4	20938.9	26762.6	285392	28577	16261.2	11427.6	85159.2	0.621274	0.447163	0.611006	0.959661	0.316278	0.643942
669.3054+++	3	669.305	0	MLOC_67834.1	DSSEPAQNGLAHQFSLPK	DSSEPAQNGLAHQFS[+80]LPK	117.54	AT2G42280.1	| basic helix-loop-helix (bHLH) DNA-binding superfamily protein | chr2:17611428-17613163 REVERSE LENGTH=359	59.01	0.9987	1.25603e-06	2.68918e-06	42056.9	67758.4	828834	406868	63824.6	69070.6	137859	264508	51294.9	147474	167853	329968	117776	103358	93964.9	159445	6.07174e+06	261508	3.63229e+06	5.20193e+06	41662.5	61838.9	165394	198077	0.444919	0.83616	0.978466	0.89666	0.155492	0.039821
744.3971++	2	744.397	0	MLOC_56942.2	SAAPTVVAPSAVLPK	S[+80]AAPTVVAPSAVLPK	117.71	AT3G18610.1	PARLL1, ATNUC-L2, NUC-L2 | nucleolin like 2 | chr3:6404270-6407822 REVERSE LENGTH=636	43.26	0.9987	4.72063e-05	7.08627e-05	34233.3	37225.1	12463	12669.7	13408	51756.5	46948.6	6523.2	11011.7	65402.7	74665.6	30475.2	38747.7	39771.2	60463.5	5916.48	43562.9	26865.3	48621.5	45904.1	10900.1	6072.36	25103.9	11722.7	0.433705	0.500207	0.995666	0.531155	0.187453	0.289634
658.3130++	2	658.313	1	AK374547	RAISMAVASSSR	RAIS[+80]MAVASSSR	112.89	-	-	41.68	0.9987	6.79204e-05	9.84057e-05	179712	28320.9	32257.3	25637.5	536765	86221.9	56576.4	21331.2	20380.9	20436.2	49949.2	280862	90900.5	54008.7	42141.3	50806.4	32208.8	45019.1	39442.6	605257	22670.1	19081.9	48128.5	68009.6	0.466491	0.548271	0.325676	0.419553	0.407274	0.403433
710.5973++++	4	710.597	0	AK368865	LFAPAFAVAASGSGDFLRPHGGGASGVSR	LFAPAFAVAASGS[+80]GDFLRPHGGGASGVSR	119.81	AT5G57870.1	eIFiso4G1 | MIF4G domain-containing protein / MA3 domain-containing protein | chr5:23439755-23443433 FORWARD LENGTH=7	152.64	0.9986	5.44503e-16	3.106e-14	711742	553094	110675	12431	218581	349819	122982	16185.1	293603	134923	313782	55384.5	325089	246380	545390	10298.2	20092.7	64019.8	102767	13079.6	45764.8	87311.8	167524	19454.5	0.742022	0.516567	0.258771	0.796965	0.636518	0.156075
974.0562+++	3	974.056	0	AK368394	AAAASYSDDTSGPESGPQSPSQSGEDWR	AAAASYSDDTSGPESGPQS[+80]PSQSGEDWR	119.01	AT1G10290.1	ADL6, DRP2A | dynamin-like protein 6 | chr1:3370774-3377120 FORWARD LENGTH=914	142.37	0.9986	5.79429e-15	2.06577e-13	62110.2	49056	128602	128778	24011.4	118129	82388.9	75932.1	40292.2	119290	124117	164928	55768.6	65543.8	121064	27905.6	122556	100760	213919	141541	76827	26650	120544	54450.1	0.680158	0.125472	0.12024	0.599899	0.0683546	0.980109
1044.9614++	2	1044.96	0	AK360586	ADEMISSSGSPLSLSDLQR	ADEM[+16]ISSSGS[+80]PLSLSDLQR	119.46	AT2G38410.1	| ENTH/VHS/GAT family protein | chr2:16086912-16090047 REVERSE LENGTH=671	107.29	0.9986	1.86638e-11	1.68227e-10	55998.3	48702.2	52861.5	86419.9	31549.1	48074.9	27345.5	43442.2	37910.6	18460.4	50951.5	43772.2	80432.1	31579.3	64196.5	36103.3	53433.8	18740.1	38311.2	72615.2	41521	16933.6	30324.2	54819.2	0.173395	0.826179	0.311642	0.355685	0.618079	0.726687
647.7768++	2	647.777	0	AK365609	FSGVFSSSGSPR	FSGVFSSSGS[+80]PR	119.5	AT3G49590.1	| Autophagy-related protein 13 | chr3:18377892-18380104 FORWARD LENGTH=603	90.83	0.9986	8.26038e-10	4.23411e-09	124094	104015	70548.5	61881.4	44407.6	71086.9	80939.8	45396.3	109126	107188	186988	77344.2	126375	78505.2	88395.7	47007.1	186315	120966	245679	143000	56764.8	19979.5	154258	147318	0.351936	0.671091	0.274383	0.582415	0.422455	0.929581
769.3742++	2	769.374	0	MLOC_4081.1	TTPVSPQAVPFASR	TTPVS[+80]PQAVPFASR	119.89	AT4G01810.1	| Sec23/Sec24 protein transport family protein | chr4:776734-779802 REVERSE LENGTH=880	79.45	0.9986	1.13501e-08	4.12009e-08	34023.8	57863.7	48272.1	43648.9	117530	54958	112176	117889	12975.4	16650.5	27806.7	28756.1	50474.5	69220.8	135531	112737	50301.4	24261.6	64157.5	115409	26518.5	12114.1	132374	431347	0.978286	0.412626	0.405416	0.589075	0.159574	0.288515
883.1938++++	4	883.194	0	MLOC_64842.1	SPVANNKPLESSAEKPPQSSVVDSKPSGSSVAIR	S[+80]PVANNKPLESSAEKPPQSSVVDSKPSGSSVAIR	119.82	AT1G10200.1	WLIM1 | GATA type zinc finger transcription factor family protein | chr1:3346677-3347763 REVERSE LENGTH=190	72.8	0.9986	5.24807e-08	1.57798e-07	79016.9	84560.1	98958.7	71126.3	73247.4	107067	82486.8	97438.8	88430.3	64266.6	94587.4	52162.4	36607	79240.9	74061.5	42632.8	80274.5	43895.2	79932	48145.6	37934.8	30162.9	94905.1	70140.8	0.269079	0.315534	0.0802973	0.435174	0.12379	0.371658
541.7188++	2	541.719	0	AK252600.1	FGSSASFGSR	FGSSASFGS[+80]R	110.59	AT2G37170.1	PIP2B, PIP2;2 | plasma membrane intrinsic protein 2 | chr2:15613624-15614791 REVERSE LENGTH=285	61.32	0.9986	7.37904e-07	1.6581e-06	55084.3	18889.8	5511.22	20449	2652.22	16662.1	29329.8	2348.81	104758	47762.9	32150.9	26647.2	20206.2	16148.1	10357.1	5412.23	602902	216600	40902.9	34384.2	15331.3	11310	41714.5	16371.9	0.479631	0.322847	0.323833	0.753781	0.264172	0.537205
824.8442++	2	824.844	1	MLOC_360.2	EQMTPLSDFEDKL	EQM[+16]TPLS[+80]DFEDKL	119.85	AT1G56070.1	LOS1 | Ribosomal protein S5/Elongation factor G/III/V family protein | chr1:20968245-20971077 REVERSE LENGTH=843	37.94	0.9986	0.000160694	0.000213173	25717.1	51066.7	6624.42	25203.2	6321.8	14967.6	14736	9088.64	24014	11276.5	17437.3	21549.5	9975.74	17813.4	20700.8	8973.17	38384.7	14067.9	31041.4	41056.3	19589.7	47452.3	21199	11397.9	0.801211	0.281159	0.989986	0.314928	0.219426	0.64849
751.0492+++	3	751.049	1	MLOC_72442.1	DKTGSVLQQAGETVVNAVVGAK	DKT[+80]GSVLQQAGETVVNAVVGAK	104.73	AT3G15670.1	| Late embryogenesis abundant protein (LEA) family protein | chr3:5310141-5310901 REVERSE LENGTH=225	117.49	0.9985	1.78238e-12	2.22407e-11	120574	126585	84548.6	23144	91883.7	110918	95112.2	16687.4	95561.7	68818.6	122575	21781.2	96981.5	67237.3	164003	3160.94	53885.7	47138.8	64213.9	14860.5	14169.9	19255.5	79934.3	7367.75	0.784679	0.987549	0.0702194	0.963428	0.310493	0.162985
767.7006+++	3	767.701	0	MLOC_32718.4	LPPPPPSPVSPTDSGVAMSPFK	LPPPPPSPVS[+80]PTDSGVAM[+16]SPFK	119.62	AT3G58600.1	| Adaptin ear-binding coat-associated protein 1 NECAP-1 | chr3:21668746-21670999 REVERSE LENGTH=302	113.76	0.9985	4.20727e-12	4.69263e-11	55157	75523.9	140493	587105	38466.7	192544	90998.4	68314.3	191829	206548	109892	424019	228446	232410	131875	124947	49279.7	359352	341255	464010	171343	179861	128277	101744	0.309653	0.336358	0.0101573	0.442514	0.665153	0.500943
713.3479++	2	713.348	0	MLOC_6887.1	KPGLSQSASFPAR	KPGLSQSAS[+80]FPAR	119.92	AT2G35880.1	| TPX2 (targeting protein for Xklp2) protein family | chr2:15063204-15065259 REVERSE LENGTH=432	83.23	0.9985	4.75335e-09	1.95269e-08	110840	172713	113923	79013.1	146884	61158.2	238325	84302.4	93382.3	190024	57853.3	107910	181190	36422.9	221627	143801	64367.2	49135.2	123781	156935	37680.9	31693.1	153663	126055	0.411395	0.739051	0.41321	0.216602	0.199831	0.941601
648.3144++	2	648.314	1	MLOC_57730.3	RLSISGQQNGR	RLS[+80]ISGQQNGR	100.98	AT4G26760.1	MAP65-2 | microtubule-associated protein 65-2 | chr4:13478834-13481300 REVERSE LENGTH=578	73.35	0.9985	4.62381e-08	1.41478e-07	20949.4	36718.4	36657	93927.4	1789.91	106994	25363.2	10684.3	54139.4	60640.8	47013.4	15122.5	2947.24	60226.5	19317.5	24376.2	85637.8	113034	78216.7	201104	52273.2	12870.3	11540.7	7256.12	0.611181	0.987344	0.474619	0.288196	0.989134	0.805226
683.0089+++	3	683.009	1	MLOC_63525.2	RGSWPGVGSPVNDVLASLR	RGS[+80]WPGVGSPVNDVLASLR	97.75	AT2G19810.1	| CCCH-type zinc finger family protein | chr2:8550419-8551498 FORWARD LENGTH=359	62.99	0.9985	5.02343e-07	1.18061e-06	37087.4	42074.5	90491.7	41321.4	166665	93791	513351	31805.8	41087.6	42689.8	62300.2	60510.4	63840.2	69009	600483	11721.7	73346.1	71609.8	18750.3	24063.7	48701.6	81942.5	22806.1	17504.8	0.921221	0.79752	0.621542	0.78958	0.2598	0.192273
546.9662+++	3	546.966	1	AK370914	RVHAIPLSPNSVLR	RVHAIPLS[+80]PNSVLR	119.31	AT3G55270.1	MKP1, ATMKP1 | mitogen-activated protein kinase phosphatase 1 | chr3:20496775-20499408 FORWARD LENGTH=784	56.83	0.9985	2.07491e-06	4.20565e-06	100268	55261.1	500831	53677	82373.8	69526.6	98107.4	51758.6	120847	1.10967e+06	78168.8	59823.1	183249	113354	61324	12678.2	431425	117820	70612	89293.1	668727	202459	357298	26889.5	0.616692	0.995968	0.298463	0.427187	0.564651	0.261389
514.2579++	2	514.258	1	MLOC_53096.2	RSFTLPAR	RSFT[+80]LPAR	119.88	AT5G53900.2	| Serine/threonine-protein kinase WNK (With No Lysine)-related | chr5:21881375-21883133 REVERSE LENGTH=377	51.18	0.9985	7.62079e-06	1.35364e-05	41313.9	59504.4	103741	154237	129825	101086	117096	88301.3	128696	121911	118827	175057	284653	119949	67327.1	46423.5	156243	466029	343493	238249	169324	71578.9	36122.1	84479.2	0.499809	0.445885	0.157324	0.183513	0.145681	0.128395
569.2994++	2	569.299	0	AK364627	ALTSVQTLPK	ALTSVQT[+80]LPK	119.85	AT1G76850.1	SEC5A | exocyst complex component sec5 | chr1:28848013-28854282 FORWARD LENGTH=1090	45.22	0.9985	3.00608e-05	4.71456e-05	43896.1	70505.3	83936.2	98519.8	59891.1	57885.6	34869.3	23325.3	18835.1	24678.5	41438.4	179209	129333	49798.5	60524.1	25123.5	91429	71823.9	131800	54074.3	22312.1	165489	21201	15782.1	0.881149	0.383016	0.256598	0.701602	0.443375	0.259145
1091.0165++	2	1091.02	0	MLOC_12181.1	SGSAPPSMEGSLAALGNLIGQK	SGS[+80]APPSM[+16]EGSLAALGNLIGQK	119.16	AT3G20250.1	APUM5, PUM5 | pumilio 5 | chr3:7059098-7062660 REVERSE LENGTH=961	183.32	0.9984	4.65586e-19	9.29543e-17	424420	449008	378318	289648	191909	321734	244637	44348.6	157745	174225	376109	138664	1.82441e+06	294854	182172	62043.3	48721.9	258650	496085	188628	75803	69493.5	150675	61127.7	0.587252	0.223253	0.972641	0.497466	0.465962	0.373624
910.4329++	2	910.433	0	AK249986.1	SHSAILTDDIISPSAGR	SHS[+80]AILTDDIISPSAGR	119.6	AT2G26280.1	CID7 | CTC-interacting domain 7 | chr2:11188143-11190579 REVERSE LENGTH=567	94.34	0.9984	3.68129e-10	2.13965e-09	130146	102435	94928.7	95574.2	112144	93419.8	61484.5	33811.9	119928	118030	151358	94514.6	139992	164610	96762.1	104047	143692	149086	132449	183596	55218.4	55903.6	84545.6	178621	0.651306	0.806409	0.84571	0.960205	0.509092	0.954111
822.8649++	2	822.865	0	MLOC_74303.1	GSDVGSGSLSTQSGLGR	GSDVGS[+80]GSLSTQSGLGR	119.95	AT5G03280.1	EIN2, PIR2, CKR1, ERA3, ORE3, ORE2, ATEIN2 | NRAMP metal ion transporter family protein | chr5:788589-793066 FORWARD	92.93	0.9984	5.09331e-10	2.80906e-09	47290.6	18432.8	27512.6	82968	23611.5	28364.8	19101.4	16772.9	25431.7	54273	53788.4	26188.5	35315.3	38505.5	29572.9	17144.3	37353.4	100888	36178.9	76293.3	16032.7	15534.6	30999.2	24486.9	0.481542	0.820706	0.317005	0.793925	0.830838	0.463963
966.9191++	2	966.919	0	MLOC_56360.3	LSTSCSEPNIANAFWR	LSTSC[+57]S[+80]EPNIANAFWR	119.86	AT3G58640.2	| Mitogen activated protein kinase kinase kinase-related | chr3:21687153-21692675 REVERSE LENGTH=809	76.77	0.9984	2.10378e-08	7.07103e-08	30198.3	56521.3	72906.4	28958.2	50481.9	63372	37821	62842	29237.9	31389.8	60421.4	41940.4	50432.1	74261.6	69496.8	15266.4	78560.4	29496.9	55052.6	41430.2	13751.5	10343.1	90825.5	72579	0.734855	0.430047	0.661671	0.665285	0.252049	0.615836
678.7826++	2	678.783	0	MLOC_34542.2	DGSLSFHVSDGR	DGS[+80]LSFHVSDGR	119.27	AT3G48330.2	PIMT1 | protein-l-isoaspartate methyltransferase 1 | chr3:17892969-17893975 REVERSE LENGTH=230	72.28	0.9984	5.91562e-08	1.76014e-07	44315.1	107294	59392.8	216380	78051.3	69528.2	36797.1	113972	82345.9	208555	180825	370037	62216.5	93631.8	32759.9	59363	108166	124822	357290	118168	136474	23948.1	45818.3	38386.4	0.155388	0.305045	0.174154	0.398879	0.143381	0.545563
1022.4175++	2	1022.42	0	AK364155	EQSTPVTELEEESEGDGK	EQSTPVTELEEES[+80]EGDGK	94.37	AT2G43650.1	EMB2777 | Sas10/U3 ribonucleoprotein (Utp) family protein | chr2:18099430-18103147 FORWARD LENGTH=654	61.84	0.9984	6.54636e-07	1.48774e-06	15190.7	20972.2	32384.3	170729	43101.9	14370.3	13991.7	58499.7	21576.2	59673.5	60080.6	116963	94351.1	14619.4	16858.6	36619.6	63189.2	327040	205948	277833	15556	9589.58	13645	35952	0.402702	0.358246	0.0888207	0.24111	0.258004	0.791426
704.8270++	2	704.827	0	MLOC_13991.2	NPSPSIGQVASGSK	NPS[+80]PSIGQVASGSK	119.94	AT1G23780.1	| F-box family protein | chr1:8407053-8408480 REVERSE LENGTH=475	58.04	0.9984	1.57036e-06	3.28296e-06	132521	57985.1	43431.6	42352.7	108200	96792.7	150021	15060.7	74030.5	70950	33277.1	50892.7	45473	36212.1	99686.8	15018.8	32064.6	63724.3	43095.1	322841	24075	75708.9	31706.3	23640.7	0.653971	0.309298	0.60264	0.76005	0.476389	0.245196
620.2971++	2	620.297	0	AK249647.1	TLSPVLGSEEK	TLS[+80]PVLGSEEK	119	AT1G71950.1	| Proteinase inhibitor, propeptide | chr1:27080453-27081573 REVERSE LENGTH=136	48.73	0.9984	1.33968e-05	2.2657e-05	53715.4	114420	37603.6	116480	95721.9	175925	186097	48197.4	256515	897999	62082.3	70087.4	827698	148685	175591	61969	591159	356304	127323	652203	204025	22354	56725.9	372782	0.616382	0.292923	0.937168	0.380243	0.415239	0.482997
734.3503+++	3	734.35	2	AK357381	SKSPIASPANGVVTSSRASPK	S[+80]KSPIASPANGVVTSSRAS[+80]PK	111.55	AT3G49430.2	SRp34a, SR34a, At-SR34a | SER/ARG-rich protein 34A | chr3:18332668-18334617 FORWARD LENGTH=297	46.59	0.9984	2.1928e-05	3.54489e-05	281109	25110.3	29564.6	39311.4	11615.4	71112.4	95196.6	8473.57	23969.1	37901.4	15445.2	16190.3	37976	55873.3	49270.4	7162.17	58539.9	32040.1	34630.5	56655.6	74227.4	2787.33	23042.9	28509.4	0.38261	0.361952	0.411469	0.947075	0.636854	0.304845
936.7175+++	3	936.718	0	AK248873.1	EDSHATEIYDDHQSNSADVPNLDR	EDSHATEIYDDHQS[+80]NSADVPNLDR	119.9	-	-	131.43	0.9983	7.19449e-14	1.56128e-12	33766.4	91304.5	265439	581476	27550.4	54295.2	138843	487917	83375	73840.3	145928	453472	156863	245131	231955	267002	371517	151699	347006	577118	103704	39657.9	142260	389062	0.648622	0.509427	0.0806859	0.837649	0.218722	0.0309341
942.9392++	2	942.939	0	AK373849	LTVGSGTQQHDAAGHGIR	LTVGS[+80]GTQQHDAAGHGIR	89.78	AT2G36640.1	ATECP63, ECP63 | embryonic cell protein 63 | chr2:15357019-15358552 REVERSE LENGTH=448	111.92	0.9983	6.42688e-12	6.71794e-11	41869.6	122253	68295.5	55989.3	26152.2	75351.8	62765.4	11877.7	451015	103284	94571.1	7325.63	379316	20033.8	572391	11236.1	204357	139076	231942	69438.8	90133.1	127033	14308.9	70819.5	0.451086	0.517233	0.258597	0.504738	0.821947	0.349099
1059.9756++	2	1059.98	0	AK363852	SLNGSSTGIESSSSLIDEQK	S[+80]LNGSSTGIESSSSLIDEQK	118.17	AT1G36990.1	| unknown protein; LOCATED IN: chloroplast; EXPRESSED IN: 24 plant structures; EXPRESSED DURING: 14 growth stages; B	106.74	0.9983	2.11836e-11	1.86724e-10	39454.2	14898.1	15246	17196.9	25765.9	15301.7	14932.7	23045.3	35077.3	26975.8	29692.3	14724.8	29930.3	21846.2	26880.5	22147.4	53248.7	75981.9	21366.6	30610.3	18455.4	6234.14	15401.2	7479.38	0.88067	0.0589236	0.0599964	0.166214	0.352995	0.32244
1143.0777++++	4	1143.08	0	AK368865	SALLGTGGPPSRPSTLTASPTPLAAQTTLSPKPSSATPASVPVPDK	SALLGTGGPPSRPSTLTASPT[+80]PLAAQT[+80]TLSPKPSSATPASVPVPDK	119.91	AT5G57870.1	eIFiso4G1 | MIF4G domain-containing protein / MA3 domain-containing protein | chr5:23439755-23443433 FORWARD LENGTH=7	101.05	0.9983	7.85236e-11	5.82797e-10	279839	337468	402054	9039.17	41287.5	266794	463448	175281	107661	24264.6	333929	27871.5	25947.5	283570	672689	92951.2	51113.9	32749.8	189809	24166.3	19223.4	55885.8	640850	80842.3	0.912973	0.179052	0.209837	0.14263	0.013211	0.102282
791.8829++	2	791.883	0	MLOC_11260.1	ITNSAGNIVGGSSIGR	ITNS[+80]AGNIVGGSSIGR	107.82	AT5G59710.1	VIP2, AtVIP2 | VIRE2 interacting protein 2 | chr5:24058157-24061736 FORWARD LENGTH=614	93.11	0.9983	4.88652e-10	2.71753e-09	45685.7	29941.5	42497.3	45495.6	37800.2	82187.8	59599.5	13847.7	54072	47645.4	39761.2	66281.4	50755	36312.2	35690.7	102697	53287.1	55108.1	56891.2	36835.5	25935.8	19186.7	32894.8	10735.8	0.482334	0.517667	0.886405	0.737857	0.708478	0.903179
836.3744++	2	836.374	0	MLOC_74303.1	APSYPDGPPSLTFSR	APSYPDGPPS[+80]LTFSR	117.28	AT5G03280.1	EIN2, PIR2, CKR1, ERA3, ORE3, ORE2, ATEIN2 | NRAMP metal ion transporter family protein | chr5:788589-793066 FORWARD	90.4	0.9983	9.12011e-10	4.60387e-09	32142.7	39996.9	141965	285462	16424.7	31036.3	90790.3	102876	37780.3	46111.5	76273.6	152606	52216.5	49296.6	124742	74445.4	70180.1	66016.2	115186	153177	46553.7	27553	144406	69882	0.796398	0.0640538	0.0814185	0.863237	0.0238828	0.0624028
711.8187++	2	711.819	0	MLOC_74010.1	SDSQVFLFANSK	SDS[+80]QVFLFANSK	119.72	AT2G36620.1	RPL24A | ribosomal protein L24 | chr2:15350548-15351819 REVERSE LENGTH=164	90.16	0.9983	9.63829e-10	4.81071e-09	68446	47513.8	151361	332231	8212.35	27820.1	180841	254209	116399	87201.2	106038	260970	118491	101558	116927	231638	125354	147122	172506	145780	66151.7	94453.8	148689	126439	0.798547	0.227746	0.129425	0.811032	0.105309	0.0701015
723.8167++	2	723.817	0	MLOC_79165.2	VVQAETYSDAGAR	VVQAETYS[+80]DAGAR	100.59	AT3G22490.1	| Seed maturation protein | chr3:7969785-7970738 REVERSE LENGTH=262	89.45	0.9983	1.13501e-09	5.58828e-09	230601	22035.4	398450	23414.1	1300.27	67705.6	192354	3385.75	19729.3	76500.1	40825.9	26033.5	200788	45478.7	856250	6282.42	51799.1	816344	635978	48104.6	801209	616984	540831	51181	0.520673	0.298234	0.410469	0.784462	0.570313	0.32208
613.7925++	2	613.792	0	MLOC_12181.1	TGISNSPTTLR	TGISNS[+80]PTTLR	107.75	AT3G20250.1	APUM5, PUM5 | pumilio 5 | chr3:7059098-7062660 REVERSE LENGTH=961	78.19	0.9983	1.51705e-08	5.30436e-08	62458.2	40714	69334.2	58371	10105.6	70116.2	55121.8	58901.3	217090	125106	112577	65803.9	235029	65558.4	59697.4	33269.6	435980	75744.6	103639	77168.9	33697.1	65088.4	22085.3	49646.1	0.290907	0.319592	0.254935	0.750393	0.580295	0.58961
978.9171++	2	978.917	0	MLOC_81884.2	VGSPTHTNSSMGTPFSNR	VGS[+80]PTHTNSSMGTPFSNR	119.41	AT2G24490.2	RPA2, ATRPA2, ROR1, ATRPA32A, RPA32A | replicon protein A2 | chr2:10398651-10400416 REVERSE LENGTH=279	76.64	0.9983	2.1677e-08	7.24928e-08	62519.7	32796.4	139397	172837	95447.2	117724	187360	120977	96745.8	142290	110421	98087.4	102424	104412	94275	99389.8	167968	114607	117329	171027	64382.6	53354.3	208939	256895	0.799979	0.720066	0.405801	0.859141	0.176492	0.292817
927.4013++	2	927.401	1	MLOC_59292.1	LNEYGSYASQKAEEGK	LNEYGSYAS[+80]QKAEEGK	107.57	AT2G36640.1	ATECP63, ECP63 | embryonic cell protein 63 | chr2:15357019-15358552 REVERSE LENGTH=448	73.77	0.9983	4.19759e-08	1.30031e-07	50615.9	55014.5	83574.3	42590.6	55663.9	37510.4	148333	32866.2	72069	70035.5	79822	55015	81696.5	56802	206277	14217.6	31490	148380	123424	36427.3	50081.6	68302	119369	68902.7	0.330989	0.0936111	0.65539	0.57656	0.0730847	0.294076
541.2575++	2	541.258	0	AK355865	SASVGAWPVK	SAS[+80]VGAWPVK	109.8	AT4G10730.1	| Protein kinase superfamily protein | chr4:6609793-6614786 REVERSE LENGTH=711	68.77	0.9983	1.32739e-07	3.62785e-07	194710	58791.1	55909.8	74373.3	114470	111117	40494.1	19327	90672.6	133445	73076.7	89960.1	126583	69145.7	67984.2	12626.7	237782	72205.5	167541	48045.3	57066.6	8331.36	48313	19255.4	0.178818	0.268587	0.149731	0.393636	0.176483	0.062254
964.9140++	2	964.914	0	AK248403.1	HQHDVQSVPDSPMLDK	HQHDVQSVPDS[+80]PM[+16]LDK	107.74	AT2G01190.1	| Octicosapeptide/Phox/Bem1p family protein | chr2:115023-117296 FORWARD LENGTH=720	65.27	0.9983	2.97167e-07	7.40691e-07	207226	31040.1	532168	160827	27349.1	788305	254227	852735	208330	329505	117588	60955.1	291669	253079	485842	920984	508413	102272	375945	78527.9	388772	334768	845899	296854	0.336615	0.842866	0.185835	0.343297	0.245355	0.13707
670.2819++	2	670.282	0	MLOC_59292.1	LNEYGSYASQK	LNEYGS[+80]YASQK	112.52	AT2G36640.1	ATECP63, ECP63 | embryonic cell protein 63 | chr2:15357019-15358552 REVERSE LENGTH=448	63.5	0.9983	4.46684e-07	1.06548e-06	83960.7	63360.3	35903.4	135247	23249.7	64427.6	12357.4	41310.6	88360.7	117110	66219.1	167129	99843.8	86093	59743.3	8650.43	128208	141835	78895.8	118544	37857.8	40974.7	40331.1	64626.4	0.806206	0.126869	0.138838	0.7298	0.594102	0.625835
650.9529+++	3	650.953	1	AK376392	SPHADSDKTEIGEIDTR	S[+80]PHADSDKTEIGEIDTR	108.65	AT5G55860.1	| Plant protein of unknown function (DUF827) | chr5:22610146-22612166 FORWARD LENGTH=649	61.89	0.9983	6.47143e-07	1.47323e-06	117896	51057.1	58896	32585.4	53136.8	60440.5	19567.2	18141.2	50744.4	122295	85161.7	93136.8	66044.6	44350.8	36982	4711.51	147197	59228.9	52189.5	157585	80286.2	27066	47632.7	22754	0.500778	0.318514	0.828879	0.167305	0.0676743	0.012555
638.2727++	2	638.273	0	AK358477	IGSPASAAAVGSK	IGSPAS[+80]AAAVGS[+80]K	118.59	AT3G18180.1	| Glycosyltransferase family 61 protein | chr3:6230270-6231878 FORWARD LENGTH=470	40.55	0.9983	8.81049e-05	0.000124093	33117.4	33336.6	54468.1	55195.1	118368	26738.2	16186.2	16394.8	107450	103212	19323.8	74764	41605.5	64264.6	17173	22520.8	306426	558415	295734	433370	153408	46869.2	103003	31002.2	0.696853	0.842363	0.809692	0.234304	0.270603	0.134985
781.3014++	2	781.301	0	AK356347	FHAASEFGEEDSR	FHAAS[+80]EFGEEDSR	119.95	AT5G38640.1	| NagB/RpiA/CoA transferase-like superfamily protein | chr5:15468020-15470674 REVERSE LENGTH=642	35.57	0.9983	0.000277332	0.000348673	9657.69	29034.1	30677.8	31077.4	18587.3	11920.4	17871.9	29024.4	40905.6	20572.8	48215.4	25732.9	34163.1	34227.5	28527.9	13145.1	144084	143094	136279	85038.1	28620.7	15072.9	41989.3	32986.2	0.991583	0.903881	0.732429	0.478953	0.797204	0.802458
783.3516+++	3	783.352	0	MLOC_54546.1	AEVEPDQSPVIAQSGGADASPSR	AEVEPDQSPVIAQSGGADAS[+80]PSR	119.71	AT1G79280.1	NUA, AtTPR | nuclear pore anchor | chr1:29819176-29832809 REVERSE LENGTH=2093	154.93	0.9982	3.21366e-16	2.0697e-14	270365	411405	299281	674055	334832	363261	310120	327065	512562	203819	155314	298088	161220	258415	197930	243640	508331	296254	188147	154801	103079	115214	219942	206978	0.29513	0.0982978	0.783085	0.677535	0.635584	0.525899
976.9461++	2	976.946	0	MLOC_72899.1	AISTYLSSSLSTSESPSR	AISTYLSSSLSTSES[+80]PSR	118.95	AT3G02260.1	BIG, DOC1, TIR3, UMB1, ASA1, LPR1, CRM1 | auxin transport protein (BIG) | chr3:431152-448489 REVERSE LENGTH=5098	125.09	0.9982	3.09742e-13	5.19664e-12	91927.2	114709	89324.3	41220.7	178898	120863	83679.3	27428.7	146185	43588.1	72674.4	45694.8	75903.6	117865	100317	20079.7	62756.5	30848.8	72380.1	61284.5	22828.3	38414.2	80091.3	50180.1	0.374143	0.470037	0.180768	0.997752	0.931128	0.327711
795.9106++	2	795.911	0	AK367129	QTVAPASPSALDLIK	QTVAPAS[+80]PSALDLIK	119.76	AT3G19840.1	ATPRP40C, PRP40C | pre-mRNA-processing protein 40C | chr3:6891228-6897227 FORWARD LENGTH=835	97.59	0.9982	1.74181e-10	1.13644e-09	186638	105261	168369	122925	71612.6	174548	148801	131229	57469.1	47736.4	108967	81723.3	113579	141670	163249	80736.1	24879	33492.1	91169.2	23181.2	44772	54566.3	165558	107233	0.661457	0.605451	0.826038	0.335465	0.057498	0.315973
734.3294++	2	734.329	0	AK253105.1	AQASFPAETPSPGK	AQASFPAETPS[+80]PGK	119.88	AT5G56280.1	CSN6A | COP9 signalosome subunit 6A | chr5:22783617-22785530 REVERSE LENGTH=317	80.76	0.9982	8.3946e-09	3.17722e-08	969879	797145	403537	190154	1.1723e+06	916063	552368	753668	831586	1.21739e+06	971558	1.20233e+06	1.0442e+06	804750	789941	384471	224606	114819	466749	728200	146675	419471	435658	523141	0.935949	0.846397	0.937664	0.85401	0.623184	0.562612
531.2494++	2	531.249	0	MLOC_59585.1	VYSGIDLSK	VYS[+80]GIDLSK	119.88	AT1G17210.1	ATILP1, ILP1 | IAP-like protein 1 | chr1:5880502-5884657 REVERSE LENGTH=958	68.07	0.9982	1.55955e-07	4.1682e-07	48101.2	52146.1	58115.9	136878	54755.4	40109.3	60726.7	71719.7	33342.8	69423.3	82610.9	176881	90524.5	56687.2	66650.5	26293.5	116111	1.21872e+07	93430.8	133503	45885.6	4456.72	36490.3	40846.1	0.42314	0.701117	0.0642836	0.241363	0.619124	0.429027
903.3914+++	3	903.391	1	MLOC_55460.1	GVLGGGGAFADRSGQGGYGGDHHDQQK	GVLGGGGAFADRS[+80]GQGGYGGDHHDQQK	118.83	AT4G25140.1	OLEO1, OLE1 | oleosin 1 | chr4:12900498-12901259 FORWARD LENGTH=173	57.83	0.9982	1.64816e-06	3.42945e-06	484788	122888	75997	34087.4	151440	2.13263e+06	1.13508e+06	989833	165766	173931	177808	78192.8	325077	149029	153054	1.03514e+06	126225	83483.5	109938	94551.4	1.03174e+06	2.18445e+06	96677.7	2.77686e+06	0.374241	0.36163	0.240148	0.305401	0.930027	0.231788
880.3790+++	3	880.379	0	AK367705	QNQASDSAGSTAQIHMNNMSPELK	QNQASDSAGSTAQIHMNNMS[+80]PELK	108.83	AT5G53620.3	| unknown protein; INVOLVED IN: biological_process unknown; EXPRESSED IN: 23 plant structures; EXPRESSED DURING: 13	44.82	0.9982	3.2961e-05	5.09931e-05	24941.5	31492.3	49057.4	30586.3	52764.2	41929.6	15553.2	6171.64	27393.2	53625.7	87488.9	56466.4	36244.7	82005.9	26480.3	20270.3	200270	24180.2	386704	67534.7	223092	38269.1	6196.84	21897.8	0.501311	0.511575	0.635714	0.500894	0.280348	0.280037
690.8547++	2	690.855	0	AK251968.1	SIPSIVELDSLK	S[+80]IPSIVELDSLK	119.86	AT5G17310.2	UGP2 | UDP-glucose pyrophosphorylase 2 | chr5:5696955-5700845 REVERSE LENGTH=470	38.51	0.9982	0.000140929	0.000189855	82518.3	44129.2	91461.5	201056	69286.8	182177	1.17764e+06	343659	30597.2	269636	167481	380141	67198.3	219449	924012	193234	56537.3	10261.2	104634	141628	16478.1	32541.3	33704.6	3907.14	0.597568	0.102866	0.128116	0.256781	0.197406	0.324542
824.8373++	2	824.837	0	AK361977	VDFSSCGSPTGLDAR	VDFSSC[+57]GS[+80]PTGLDAR	118.9	AT3G21100.2	| RNA-binding (RRM/RBD/RNP motifs) family protein | chr3:7399162-7401870 FORWARD LENGTH=602	119.29	0.9981	1.17761e-12	1.58857e-11	28867	66522.2	45681.1	217265	138429	69231.9	1.7552e+06	145667	76683.9	36022.5	49387.6	87395.6	117391	76122.1	52084.1	88820	106738	354394	114370	740673	34138.4	107447	239176	177989	0.514824	0.978045	0.301124	0.750165	0.391682	0.394124
1223.5438++	2	1223.54	0	AK372699	VAANSAASAAPGLSPSSSMGSLSSDK	VAANSAASAAPGLS[+80]PSSSM[+16]GSLSSDK	119.49	AT3G14010.4	CID4 | CTC-interacting domain 4 | chr3:4637164-4640324 FORWARD LENGTH=549	92.79	0.9981	5.26017e-10	2.88119e-09	206792	230532	218515	277320	164440	197018	188901	162716	196496	214573	159146	235754	151448	166808	146336	98366.3	449034	353044	332286	493400	287371	90607.6	185013	308445	0.859037	0.657875	0.684874	0.423295	0.604135	0.891408
922.4187+++	3	922.419	0	AK249160.1	GNGEPASVTGVSPPTKPTSFSDQPDGR	GNGEPASVTGVS[+80]PPTKPTSFSDQPDGR	114.31	AT4G36690.4	ATU2AF65A | U2 snRNP auxilliary factor, large subunit, splicing factor | chr4:17294139-17297609 REVERSE LENGTH=551	88.17	0.9981	1.52405e-09	7.19331e-09	270870	254837	283387	230146	305671	295313	110223	239370	129761	31753.8	226776	46070.5	66976.9	235704	200567	108346	75026.5	57013.8	59911.7	54940.8	17922.5	17393.1	14357.9	28916.7	0.663478	0.746739	0.605059	0.696812	0.847157	0.968388
688.8503++	2	688.85	0	MLOC_30711.1	AANLSGPLSLPTR	AANLSGPLS[+80]LPTR	117.41	AT4G10730.1	| Protein kinase superfamily protein | chr4:6609793-6614786 REVERSE LENGTH=711	70.16	0.9981	9.63829e-08	2.72369e-07	73728.5	84342.1	50519.4	30257	84351.4	95287.2	86371	83167.9	65196	244563	95274.8	108317	142207	71218	47000.9	38955.2	1.16005e+06	1.19167e+06	299604	161247	41729.1	29226.1	33649.6	23532.9	0.892253	0.523822	0.45839	0.538508	0.383383	0.317434
577.9211+++	3	577.921	0	MLOC_65838.1	HDSPSSHSFTPPSIR	HDS[+80]PSSHSFTPPSIR	119.87	AT5G48150.2	PAT1 | GRAS family transcription factor | chr5:19522497-19524053 REVERSE LENGTH=490	61.08	0.9981	7.7983e-07	1.74446e-06	89549.3	128970	240787	117842	184586	129335	353885	99012.2	433533	330077	200850	340577	211877	113316	94447.3	169318	659716	523276	185509	254562	169818	69931.6	129867	348098	0.76151	0.381925	0.47175	0.0296281	0.965824	0.844646
670.2819++	2	670.282	0	MLOC_59292.1	LNEYGSYASQK	LNEYGSYAS[+80]QK	108.5	AT2G36640.1	ATECP63, ECP63 | embryonic cell protein 63 | chr2:15357019-15358552 REVERSE LENGTH=448	56.8	0.9981	2.0893e-06	4.23051e-06	53450.3	90038.6	167141	253355	55008.3	214795	219304	28401.7	67739.4	239630	135756	92343	57007.3	153203	153662	22748	48570.5	228288	244881	165641	35797.2	93433.6	167642	23055.9	0.116161	0.0620497	0.135901	0.099429	0.024948	0.072753
868.0570+++	3	868.057	1	MLOC_64351.2	NASTSSDMSSLASQGTPSNSAPLRR	NAS[+80]TSSDMSSLASQGTPSNSAPLRR	119.77	AT1G64110.3	| P-loop containing nucleoside triphosphate hydrolases superfamily protein | chr1:23796887-23801255 REVERSE LENGTH=8	145.45	0.998	2.85102e-15	1.17362e-13	995521	1.31643e+06	2.88445e+06	56352.5	2.53969e+06	2.85862e+06	3.008e+06	4.50701e+06	1.01242e+06	1.26772e+06	1.60332e+06	1.45327e+06	1.29229e+06	3.20513e+06	6.27801e+06	1.84847e+06	266503	111398	373851	847761	168017	1.26778e+06	4.53553e+06	1.95812e+06	0.782139	0.376858	0.957095	0.308744	0.0675309	0.284478
1223.2716+++	3	1223.27	0	MLOC_57175.1	SPAVPVVVPVSPSPEVQPAGGDGAPKPQPEEQQQGK	SPAVPVVVPVS[+80]PSPEVQPAGGDGAPKPQPEEQQQGK	115.87	AT3G45980.1	H2B, HTB9 | Histone superfamily protein | chr3:16897492-16897944 REVERSE LENGTH=150	142.84	0.998	5.19996e-15	1.88759e-13	2.42677e+06	993046	899550	197642	1.1203e+06	1.21288e+06	736750	707260	385114	168820	495503	154248	283787	801359	1.1731e+06	383468	171033	178278	324737	66180.3	70970.1	180067	1.17571e+06	567959	0.550297	0.626236	0.356935	0.622934	0.26666	0.871374
677.3241++	2	677.324	0	MLOC_19482.1	TGSVLGQAGEQVK	TGS[+80]VLGQAGEQVK	119.74	AT3G15670.1	| Late embryogenesis abundant protein (LEA) family protein | chr3:5310141-5310901 REVERSE LENGTH=225	102.42	0.998	5.72796e-11	4.41539e-10	126634	226752	120103	52678.8	23024	261814	210150	36334.3	253576	273464	265886	177695	68744.7	260899	260096	18042.3	125059	186924	178626	449348	73230.4	172923	162234	203735	0.307105	0.763524	0.686591	0.0133145	0.0172433	0.662558
635.7874++	2	635.787	0	MLOC_56500.1	DASGTVSVADLR	DAS[+80]GTVSVADLR	108.66	AT1G12310.1	| Calcium-binding EF-hand family protein | chr1:4187500-4187946 REVERSE LENGTH=148	64.64	0.998	3.43558e-07	8.43163e-07	68299	41097.4	62140.8	23120.3	41385.5	88761.4	73131.5	11773.8	45821.6	65782.9	44295.5	46673.3	53847.8	50991.2	38497.1	24821.5	111077	124214	243821	117536	95095	79000.9	29114.8	113542	0.953732	0.595041	0.73676	0.664786	0.489406	0.744553
872.4342++	2	872.434	2	AK353634	LFSGVSPAAKDLMRR	LFSGVS[+80]PAAKDLM[+16]RR	119.48	AT1G08650.1	PPCK1, ATPPCK1 | phosphoenolpyruvate carboxylase kinase 1 | chr1:2752206-2753232 FORWARD LENGTH=284	60.16	0.998	9.63829e-07	2.11692e-06	8545.28	4679.19	20723.9	10805.3	25143	12849.4	35626.5	23802.9	12341.8	14072.9	10863.9	19235.5	8747.72	22279.2	31176.8	15020.5	22734.7	11389.7	7784.43	27101	18792.6	10807.5	52577.7	59684.1	0.441439	0.821712	0.52813	0.730094	0.0706512	0.401863
1003.1007+++	3	1003.1	1	AK249875.1	RDSPAPINEEVEMTEADDVDNAAVPDK	RDS[+80]PAPINEEVEMTEADDVDNAAVPDK	118.87	AT3G22440.1	| FRIGIDA-like protein | chr3:7959854-7961886 FORWARD LENGTH=532	56	0.998	2.51189e-06	4.95796e-06	25499	24530.9	54175.7	19950.3	23543.5	47074.1	25648.8	41942.2	47082.1	82691.8	19667.5	43067.6	78423.3	43702.8	34272.5	25674.7	72033.5	47294.7	60243	38228.7	31241.1	32584.8	44058.1	52650	0.888304	0.861289	0.411098	0.870029	0.64186	0.840362
454.2073++	2	454.207	0	MLOC_59068.1	LGSFTFR	LGS[+80]FTFR	116.29	AT3G48530.1	KING1 | SNF1-related protein kinase regulatory subunit gamma 1 | chr3:17987559-17989592 FORWARD LENGTH=424	50.3	0.998	9.33254e-06	1.62658e-05	2685.68	51346.8	120176	182721	11881.9	94541	139693	99747	20976.3	68740.8	121420	207723	21569.1	96365.6	103176	22019.4	56602.2	159866	167857	126671	57909.5	131551	107801	26078.9	0.21536	0.0160599	0.0148139	0.0251121	0.0174817	0.560991
846.3461++	2	846.346	0	MLOC_72634.2	YHSYDYGPATPGAGR	YHSYDYGPAT[+80]PGAGR	119.85	AT1G67210.1	| Proline-rich spliceosome-associated (PSP) family protein / zinc knuckle (CCHC-type) family protein | chr1:25141339	48.65	0.998	1.36458e-05	2.30392e-05	13923.5	26684	68216.5	154758	41847.9	19852.1	44676.3	11585	178748	41023.7	248050	218734	227783	21347.4	25849.6	24768.7	49354.2	173096	103331	47130.9	71411.3	27998.5	19987.7	237368	0.995623	0.484505	0.462304	0.257129	0.287572	0.825188
812.6969+++	3	812.697	0	AK369564	EAPFQQGQANQSVPCQAAATPR	EAPFQQGQANQSVPC[+57]QAAAT[+80]PR	119.9	AT4G39680.2	| SAP domain-containing protein | chr4:18414604-18416938 REVERSE LENGTH=633	45.18	0.998	3.03389e-05	4.75072e-05	54354.1	97951.4	80354.4	27379.1	68484.3	73759.1	108621	47961.1	28265	29820.6	115562	48973.2	49690.7	80293.7	121002	18860.1	224342	26949.1	102281	106039	38040.9	39853.6	146591	40582.3	0.520706	0.966875	0.592507	0.473157	0.0142768	0.282321
771.3607++	2	771.361	0	MLOC_53885.1	GGGQSALGSALGLMSR	GGGQSALGSALGLMS[+80]R	119.8	AT4G35300.4	TMT2 | tonoplast monosaccharide transporter2 | chr4:16796432-16799071 REVERSE LENGTH=739	42.4	0.998	5.7544e-05	8.48498e-05	93449.1	58848.5	227458	187893	15026.5	83903.1	99760.2	13328.9	144558	134119	119247	216916	273964	15580.4	147060	99753.7	466648	168147	352332	353104	143774	84455.7	148062	113124	0.444469	0.98979	0.901969	0.399855	0.883962	0.484968
996.9673++	2	996.967	0	MLOC_63578.2	VPTSSATAAATSAAPPGGSPSK	VPTSSATAAATSAAPPGGS[+80]PSK	116.36	AT3G07090.1	| PPPDE putative thiol peptidase family protein | chr3:2243153-2244476 REVERSE LENGTH=265	127.83	0.9979	1.64816e-13	3.01886e-12	302695	84086.8	129248	67124.9	49576.1	158549	313272	92315.5	58026.4	38070.3	48929.6	35701.3	50289.6	40621.6	190329	70001.4	43190.3	29108.4	38205.5	8286.5	24568.3	33123.9	151769	62137.5	0.430022	0.554822	0.373407	0.477512	0.0699144	0.0741961
637.9632+++	3	637.963	1	AK360537	ARSPPSVLFDHAEYSR	ARS[+80]PPSVLFDHAEYSR	110.78	AT5G48930.1	HCT | hydroxycinnamoyl-CoA shikimate/quinate hydroxycinnamoyl transferase | chr5:19836654-19838092 REVERSE LENGTH=433	59.05	0.9979	1.24451e-06	2.66739e-06	29743.5	26408.7	30234.1	39818.6	23051.2	21836	70029.5	14754.8	40786.5	97015.7	41731.2	36485.7	48561.2	47178.5	22396	27771.8	126376	101128	48233.9	68193.7	109912	16825	46304.3	48216.4	0.828398	0.496045	0.641357	0.36497	0.658816	0.386666
931.9427++++	4	931.943	1	MLOC_65169.1	VEREEGELSPNGDFEEELYRPLGNAAVGGASKPK	VEREEGELS[+80]PNGDFEEELYRPLGNAAVGGASKPK	105.39	AT1G70060.1	SNL4 | SIN3-like 4 | chr1:26383789-26389568 FORWARD LENGTH=1326	45.77	0.9979	2.6485e-05	4.19495e-05	27774.3	25378	30647.9	46347.3	6278.27	27553.1	31229.2	20109.9	15197.5	25477.1	28589.2	49691.9	12189.2	17232.2	19886.2	10257.1	75428	33124.4	40115.8	63744.9	18925.8	5028.59	26718.9	21966.3	0.598787	0.766366	0.545221	0.617826	0.0713916	0.405096
616.8323++++	4	616.832	1	AK368865	NQGPLINKIPSSINKPSPINPR	NQGPLINKIPS[+80]SINKPSPINPR	115.54	AT5G57870.1	eIFiso4G1 | MIF4G domain-containing protein / MA3 domain-containing protein | chr5:23439755-23443433 FORWARD LENGTH=7	120.97	0.9978	7.99834e-13	1.1656e-11	72268.9	182768	253162	99213.2	100782	292515	389910	41781.9	30390.5	130601	488613	87855.9	137162	223895	648653	11019.3	68427.5	82408.5	174388	70487.7	36105.3	91954	291144	28616	0.143481	0.121146	0.164865	0.23268	0.0862238	0.172998
1048.4941++	2	1048.49	0	MLOC_43148.2	NNELSSHAYASILGPSLSR	NNELSSHAYASILGPSLS[+80]R	119.55	AT2G29200.1	APUM1, PUM1 | pumilio 1 | chr2:12549483-12553185 REVERSE LENGTH=968	101.77	0.9978	6.65273e-11	5.04067e-10	102780	91781.6	160323	616700	21272.1	94085.7	135771	475532	45655.4	64872.8	120635	447869	125832	86386.2	100349	268182	64155.6	57811.9	147587	293067	72091.9	50578.8	153819	497075	0.976748	0.0391345	0.056683	0.915708	0.193011	0.0497962
683.2700++	2	683.27	0	MLOC_1248.1	SQSFACMAEVR	SQS[+80]FAC[+57]MAEVR	110.44	AT5G56550.1	OXS3, ATOXS3 | oxidative stress 3 | chr5:22895847-22896502 REVERSE LENGTH=172	99.45	0.9978	1.13501e-10	7.89564e-10	140041	132308	111071	18947	413966	369035	21374.2	74372.6	234447	284566	99622.9	144759	311589	129317	104090	25596.1	158962	114607	64907	62876.2	55932.3	9764.26	64179.9	26170.2	0.992113	0.115177	0.116749	0.586364	0.212327	0.179669
767.3221++	2	767.322	0	AK362998	SAPYSPVYNGEGGR	SAPYS[+80]PVYNGEGGR	119.93	AT3G01540.1	DRH1, ATDRH1 | DEAD box RNA helicase 1 | chr3:213077-216142 REVERSE LENGTH=618	83.13	0.9978	4.86407e-09	1.98591e-08	135610	193473	181915	60142.3	222275	540393	114717	49389.6	252747	257410	194196	101073	570715	186036	158236	90566.6	183817	179006	157454	99403.8	6.03629e+06	139265	133984	64560.4	0.675662	0.752757	0.104647	0.402594	0.373381	0.361605
693.5775++++	4	693.578	2	MLOC_71715.1	RVVKPDPPTEDDEEEETPLPSRR	RVVKPDPPT[+80]EDDEEEETPLPSRR	111.29	AT1G09060.3	| Zinc finger, RING-type;Transcription factor jumonji/aspartyl beta-hydroxylase | chr1:2921235-2925254 REVERSE LENGT	45.44	0.9978	2.85759e-05	4.49227e-05	55442.6	49364.8	8145.74	14896.5	3552.61	12731.3	4947.95	13658.3	41006.7	10665.8	44667	169141	6514.55	10108.7	9097.65	3148.07	21645.6	12683.4	16766	21532.6	18424.2	1371.09	8720.32	19170.4	0.412599	0.352813	0.627008	0.8184	0.72585	0.728145
668.6405+++	3	668.641	0	MLOC_4753.2	AAGTAQQTGSYIGQTAEAAK	AAGTAQQTGS[+80]YIGQTAEAAK	119.54	AT3G15670.1	| Late embryogenesis abundant protein (LEA) family protein | chr3:5310141-5310901 REVERSE LENGTH=225	121.42	0.9977	7.21107e-13	1.06644e-11	44402.3	83442.4	70940.8	148037	25061.4	79156	112419	56871.8	135126	56464.6	120931	97043.1	148096	91495.9	209069	54613.7	245283	66923.6	169384	195757	68618.1	36814.7	138239	139196	0.340795	0.774301	0.941714	0.800123	0.213682	0.952099
433.7164++++	4	433.716	1	MLOC_7019.5	GRPRTPTPGSYLGHR	GRPRT[+80]PTPGSYLGHR	110.36	AT4G35785.1	| RNA-binding (RRM/RBD/RNP motifs) family protein | chr4:16953211-16955127 REVERSE LENGTH=238	73.14	0.9977	4.85289e-08	1.47246e-07	28139.4	75261	56529.7	51374.1	17251.7	40830	35497.2	11376	83073.9	29218.8	29515.6	219578	31385.7	32726	12371.1	161287	23761.2	141407	82496.6	180433	22674.3	39579.5	171734	340585	0.399507	0.678401	0.191481	0.0630839	0.42619	0.262015
812.1325++++	4	812.133	1	AK355694	RAYSEGDIQNLGGNTPRPEIVGNAHASGER	RAYS[+80]EGDIQNLGGNTPRPEIVGNAHASGER	109.67	AT5G53420.1	| CCT motif family protein | chr5:21673683-21675469 FORWARD LENGTH=264	66.98	0.9977	2.00447e-07	5.21084e-07	63567.2	67550	15653.6	107614	62168	83292.8	35603.6	19411.9	93326.1	59685.2	54765.8	67275.6	46716.2	62301.9	31710	15654.3	44050.9	39639.5	77399	20994.4	16099.3	5099.54	6014.35	25827.7	0.542134	0.497967	0.957032	0.771765	0.371223	0.263131
522.2497++	2	522.25	0	MLOC_11248.2	LVASSPSFR	LVASSPS[+80]FR	119.97	-	-	59.41	0.9977	1.14551e-06	2.47245e-06	101206	36821.6	94794.9	143175	81204.1	112878	118844	132404	94777.6	106701	68580.8	121354	131886	74287.7	54905.2	47686.6	140242	199598	127715	1.47342e+06	114312	104335	141073	65371	0.967014	0.547148	0.405888	0.571844	0.896993	0.426604
806.9027++	2	806.903	1	MLOC_38198.2	SFKGSLPDVVNIEK	S[+80]FKGSLPDVVNIEK	117.86	AT4G17140.3	| pleckstrin homology (PH) domain-containing protein | chr4:9613617-9636618 REVERSE LENGTH=4219	51.95	0.9977	6.38263e-06	1.15477e-05	140334	221543	711555	772159	23859.1	190260	169640	161218	652281	680318	46953.9	1.6783e+06	38362.6	431268	65790.6	116690	2.30948e+06	2.35239e+06	2.6871e+06	2.76036e+06	691116	681502	118577	148357	0.959534	0.918357	0.47875	0.534364	0.609768	0.669885
963.4256+++	3	963.426	0	AK374192	STNVLYGADWGSVTPTSPEDDAEVAAR	STNVLYGADWGSVTPTS[+80]PEDDAEVAAR	119.86	AT1G11360.4	| Adenine nucleotide alpha hydrolases-like superfamily protein | chr1:3822171-3822899 REVERSE LENGTH=242	176.06	0.9976	2.47742e-18	3.66383e-16	218265	214099	212391	34165.3	38023.3	157911	38718	43030.4	60947.2	42093.8	30020.6	29910	82912.3	34041.8	242686	64655.6	26446.4	42752.8	50108.9	50108.9	29827.9	5501.57	15312.2	37819.4	0.979999	0.961039	0.394735	0.783398	0.578762	0.932911
840.8593++	2	840.859	0	MLOC_45354.1	DIDPNASNNSPDTLK	DIDPNASNNS[+80]PDTLK	116.56	-	-	101.79	0.9976	6.62217e-11	5.02705e-10	286854	92752.1	102443	91737	399280	142217	78146.3	78178.9	75196.6	97611.6	69415.1	500328	1.05976e+06	117830	124879	74765.6	524464	56757.8	150967	2.07299e+06	58042.8	73260.1	67021.9	66122	0.24379	0.290348	0.438471	0.312498	0.29365	0.279012
617.7586++	2	617.759	0	MLOC_6787.1	TSSDTAAFAGAR	TSS[+80]DTAAFAGAR	105.13	AT1G53540.1	| HSP20-like chaperones superfamily protein | chr1:19980510-19980983 FORWARD LENGTH=157	101.11	0.9976	7.74462e-11	5.76945e-10	292368	221743	93208.1	156625	259779	455185	160419	29044	343159	579449	272541	232776	268710	264799	105720	8670.37	96475	313039	186865	66380.9	187407	182100	204038	36686.5	0.402604	0.55929	0.37821	0.540595	0.122416	0.0156461
798.3769++	2	798.377	0	MLOC_64351.2	SLSHALEIFQENK	S[+80]LSHALEIFQENK	119.52	AT1G64110.3	| P-loop containing nucleoside triphosphate hydrolases superfamily protein | chr1:23796887-23801255 REVERSE LENGTH=8	90.26	0.9976	9.4189e-10	4.7189e-09	124744	80930.7	55045.6	84271.8	75361	117165	83456.7	73284.3	29053.6	45223.4	73180.4	74242.7	63796.2	75037.9	69295.1	55483	22429.3	41500.9	58276.3	72261.7	31008	27923.8	88560.4	72402.6	0.94296	0.927949	0.639479	0.623728	0.243102	0.549721
795.3512++	2	795.351	0	MLOC_54346.5	ITSGDMVMASPVSAK	ITSGDMVM[+16]AS[+80]PVSAK	119.76	AT1G55860.2	UPL1 | ubiquitin-protein ligase 1 | chr1:20879900-20892910 REVERSE LENGTH=3681	79.69	0.9976	1.07399e-08	3.93074e-08	111571	32170.2	33745.3	127362	104084	38505	36174.1	790191	80135.1	41932.3	43707	467663	475832	134187	30284.4	17142.6	129722	243096	227910	101356	3.75027e+06	34528.8	89294.3	48536.1	0.985808	0.941632	0.403429	0.357453	0.352681	0.431693
900.0440+++	3	900.044	1	MLOC_64351.2	NASTSSDMSSLASQGTPSNSAPLRR	NAS[+80]TSSDM[+16]SSLASQGTPSNS[+80]APLRR	119.89	AT1G64110.3	| P-loop containing nucleoside triphosphate hydrolases superfamily protein | chr1:23796887-23801255 REVERSE LENGTH=8	51.93	0.9976	6.4121e-06	1.15958e-05	50670.6	131247	62166.2	73577.4	14436.2	30726.8	45433.1	38716	66020.5	55274.2	138019	36236.7	14939.4	18193.2	53713.8	11910.6	112041	38571.5	98200.6	332767	30485.6	14990.6	140464	32586.6	0.973747	0.476795	0.531505	0.861888	0.19155	0.479719
1003.9752++	2	1003.98	0	AK364101	ILSSIQPSDATADPDAGLR	ILS[+80]SIQPSDATADPDAGLR	119.72	AT2G26590.3	RPN13 | regulatory particle non-ATPase 13 | chr2:11311182-11314717 REVERSE LENGTH=300	135.12	0.9975	3.0761e-14	8.08083e-13	40940.2	127873	310759	221526	18614.5	123881	246234	107853	49333.4	39943.3	107815	58689.6	208279	82194.8	226124	60511.5	36814.9	26462.8	52961.4	47459.3	15456.1	39276.3	155039	74115.2	0.556536	0.281063	0.357346	0.989635	0.206043	0.999533
981.9075++	2	981.907	0	MLOC_4350.2	DNSFSPAGSVDLASASDSR	DNSFS[+80]PAGSVDLASASDSR	119.31	AT5G51660.1	CPSF160, ATCPSF160 | cleavage and polyadenylation specificity factor 160 | chr5:20980250-20989268 FORWARD LENGTH=1442	127.43	0.9975	1.80717e-13	3.25047e-12	47742.1	48998.6	47189.4	61799.2	37446.6	40878.6	58248.7	46123.5	20974.1	31383.9	53223	83148	41802.6	47619.8	63038.8	48032.6	93585.4	64452.6	54533.3	47144.6	25502.8	29811.4	77381.4	54956.2	0.825669	0.918949	0.715245	0.570678	0.0253505	0.0764438
1104.5057+++	3	1104.51	0	AK368609	ALSTGQVPAEFALPKPDTNMAEASEEAEAEK	ALSTGQVPAEFALPKPDTNMAEAS[+80]EEAEAEK	119.68	AT1G09760.1	U2A' | U2 small nuclear ribonucleoprotein A | chr1:3159476-3161603 REVERSE LENGTH=249	86.5	0.9975	2.23872e-09	1.01008e-08	10847	6655.47	93660.3	8885.07	1866.07	8647.04	37432.1	172093	9331.04	18889.1	6305.57	28491.5	6552.45	22444.1	83339.4	146425	26624.3	26923.5	15778	8774.48	13570.4	5778.36	106577	137448	0.830246	0.501019	0.981389	0.480042	0.0798475	0.00565403
914.4299++	2	914.43	1	AK362485	TGAQFAVETESPKSPAK	TGAQFAVETESPKS[+80]PAK	119.84	-	-	75.62	0.9975	2.74157e-08	8.93641e-08	37223.4	54943.7	130032	243014	44029.5	58268.4	51970.4	54226.5	59138.5	26412.1	41390.4	24115.6	27016.4	68343.3	80979.8	86388	27174.8	55573.5	63672.3	45181.3	10248.6	9319.23	88815.5	49288.3	0.762194	0.318622	0.465503	0.443217	0.051187	0.0971645
705.8098++	2	705.81	0	MLOC_44271.1	GQFMTEYVVTR	GQFMTEY[+80]VVTR	119.55	AT1G10210.2	ATMPK1, MPK1 | mitogen-activated protein kinase 1 | chr1:3349579-3350776 FORWARD LENGTH=370	66.09	0.9975	2.46037e-07	6.25748e-07	35578.3	15687.8	29785.3	13463.1	48335.6	39026.6	48172.6	71695.6	32756.4	72812.8	25255.9	33896.1	112802	43680.9	63391.2	54468.3	121042	95194.3	105203	79734.2	38779.8	17477.5	132960	20626.7	0.962809	0.818884	0.59455	0.309239	0.699192	0.567633
1148.4553++	2	1148.46	0	AK365912	AVDAGMMEYDSDDNPIVVDK	AVDAGM[+16]M[+16]EYDS[+80]DDNPIVVDK	110.77	AT2G47330.1	| P-loop containing nucleoside triphosphate hydrolases superfamily protein | chr2:19429083-19431617 REVERSE LENGTH=7	64.1	0.9975	3.89045e-07	9.44351e-07	19341	16730.9	13420.4	19598.1	11199.2	10965.1	21331.3	31478.3	9901.73	24050.2	7636.2	34730.6	31138.6	13159.7	11960.4	15560.1	32761.8	20850.5	30322.4	62835.1	16226.2	14591.3	7689.47	18164.4	0.98738	0.734146	0.288744	0.390141	0.476157	0.793952
701.3479++	2	701.348	1	AK373849	SLASAVGRTFGGAK	SLASAVGRT[+80]FGGAK	119.91	AT2G36640.1	ATECP63, ECP63 | embryonic cell protein 63 | chr2:15357019-15358552 REVERSE LENGTH=448	59.72	0.9975	1.0666e-06	2.32094e-06	16227.8	246793	149602	49320.9	22923.3	325921	87253	56902.8	457816	502883	377997	62320.3	135503	368972	115874	46239	1.18265e+06	1.04655e+06	1.07296e+06	79041	401133	88544.8	103576	63269	0.917601	0.96868	0.287322	0.635655	0.531626	0.363305
481.2106++	2	481.211	0	MLOC_67834.1	GQLSFSSR	GQLS[+80]FSSR	118.6	AT2G42280.1	| basic helix-loop-helix (bHLH) DNA-binding superfamily protein | chr2:17611428-17613163 REVERSE LENGTH=359	46.96	0.9975	2.01372e-05	3.2833e-05	13995.3	23801.4	59611.3	69316.9	23714.9	31334.9	48278.4	39737.2	43390.6	43824.5	34662.4	77018.5	23383.9	31338.2	45617.6	13111.1	57943.7	63296.1	77764.4	178335	9642.92	28161.9	67630.2	181067	0.782688	0.37025	0.203285	0.139412	0.0248469	0.376202
973.4432++	2	973.443	0	MLOC_5598.2	EEADSTINPATPPPAEVK	EEADSTINPAT[+80]PPPAEVK	118.91	AT1G15340.1	MBD10 | methyl-CPG-binding domain 10 | chr1:5275895-5277474 REVERSE LENGTH=384	42.2	0.9975	6.0256e-05	8.84241e-05	104778	88508.8	38644	73414	24509.2	57332.4	94482.3	74154.7	26148.5	23818.3	93717.6	85292.9	28048.8	15769.3	363388	45853.6	58958.2	14691.5	23500.1	34345.4	20205.8	233694	309985	73417.5	0.56559	0.740551	0.971789	0.363483	0.106245	0.0523741
738.0193+++	3	738.019	0	AK372616	SLSLDAAFFEGLALQGGGGGHK	SLS[+80]LDAAFFEGLALQGGGGGHK	119.34	AT1G43700.1	VIP1, SUE3 | VIRE2-interacting protein 1 | chr1:16484352-16486017 FORWARD LENGTH=341	120.52	0.9974	8.87156e-13	1.26968e-11	86480.5	105236	148059	70354.9	7826.08	19264.1	80236.9	61957.1	28781.8	75438.8	108239	7006.24	20424.5	47403.9	44591	28314.7	41021.9	46545.5	94573.9	29294.6	28997.4	23237.1	77993.6	6300.9	0.403917	0.0720827	0.563316	0.385018	0.0339363	0.527983
947.1274+++	3	947.127	0	AK368865	LFAPAFAVAASGSGDFLRPHGGGASGVSR	LFAPAFAVAASGSGDFLRPHGGGAS[+80]GVSR	119.87	AT5G57870.1	eIFiso4G1 | MIF4G domain-containing protein / MA3 domain-containing protein | chr5:23439755-23443433 FORWARD LENGTH=7	86.53	0.9974	2.22331e-09	1.00426e-08	132731	177834	98126.6	18604.1	140840	203616	72605.9	10474.6	86513.8	85382.5	259025	33468.7	172805	209681	165137	11684.3	88678.9	38934.5	155326	63414.3	52360.7	47278.2	94176.4	20699	0.968748	0.301815	0.0491159	0.657133	0.819297	0.0966648
745.3140++	2	745.314	0	MLOC_54389.1	GLVSYGDGSPDSAGK	GLVSYGDGSPDS[+80]AGK	119.85	AT3G63400.2	| Cyclophilin-like peptidyl-prolyl cis-trans isomerase family protein | chr3:23412449-23415435 FORWARD LENGTH=387	51.05	0.9974	7.85236e-06	1.38983e-05	435307	284072	64638.7	123554	486563	386164	41350.2	52945.1	237372	325430	280951	37448.5	365376	254290	207912	31664.7	771562	557235	497677	649081	38886	272984	26577.6	290151	0.638454	0.390012	0.45448	0.961928	0.29491	0.354016
720.3432++	2	720.343	0	AK250482.1	TFSANRPVSPQR	TFSANRPVS[+80]PQR	91.13	AT2G29210.1	| splicing factor PWI domain-containing protein | chr2:12558156-12562168 FORWARD LENGTH=878	40.75	0.9974	8.41395e-05	0.000119223	33464.6	44742	29343.3	274559	5470.37	52400.8	37706.1	13173.1	130565	103849	61850.9	1690.89	142673	205881	21040.3	40438.5	54203.1	48311.5	60806.9	39047.3	23879.4	115823	32076.5	18538.6	0.852773	0.554721	0.754584	0.356094	0.595515	0.526568
1138.8250+++	3	1138.83	1	AK370207	RFLHASTDSEEGANSPTEATTPNQESTEEAK	RFLHASTDSEEGANS[+80]PTEATTPNQESTEEAK	112.9	AT5G64130.1	| cAMP-regulated phosphoprotein 19-related protein | chr5:25664547-25665339 REVERSE LENGTH=115	141.34	0.9973	7.34514e-15	2.46463e-13	615342	446360	341949	386067	230471	536873	163260	201936	188859	210315	255664	233831	169659	246807	399427	206317	244598	119333	327711	71757.8	40263.8	121167	316377	383566	0.62109	0.791448	0.514953	0.370907	0.19912	0.248471
762.3501++	2	762.35	0	AK248191.1	AIFGAGTFNFSPSK	AIFGAGTFNFS[+80]PSK	119.64	AT1G30240.2	| unknown protein; Has 169 Blast hits to 168 proteins in 75 species: Archae - 0; Bacteria - 0; Metazoa - 49; Fungi -	90.58	0.9973	8.74984e-10	4.43377e-09	222614	153402	81201.7	241103	217542	161422	30668.1	125752	90733.3	60187.3	197008	121555	197194	130304	57501.4	28250.8	391196	407687	351069	593116	51621.8	19237.7	79418.9	180057	0.850743	0.843855	0.648855	0.500262	0.207079	0.565927
623.9839+++	3	623.984	1	AK374932	KPLPSRYPSLGTGGGFR	KPLPSRYPS[+80]LGTGGGFR	110.42	AT3G26400.1	EIF4B1 | eukaryotic translation initiation factor 4B1 | chr3:9666616-9669081 FORWARD LENGTH=532	78.63	0.9973	1.37088e-08	4.84419e-08	115360	530984	489458	137691	431079	612979	22588.2	21825.9	132594	845283	1.00203e+06	79476.6	248234	774231	836185	8979.81	606597	199249	105237	238833	153685	31313.7	17890.6	114337	0.401262	0.477444	0.510951	0.501282	0.963773	0.120938
1005.9382++	2	1005.94	0	AK250267.1	NAKPVVEWLQSAESDEE	NAKPVVEWLQSAES[+80]DEE	119.63	AT1G36730.1	| Translation initiation factor IF2/IF5 | chr1:13898706-13900025 REVERSE LENGTH=439	58.4	0.9973	1.44544e-06	3.04733e-06	45013.6	30572.5	38169.8	13521.5	12404.2	20535	84870.4	41038.2	20526.9	41571.2	8082.62	17248.7	365549	37106.3	86891	123611	104353	12527.5	27121	46554	39321	11579.8	51302.8	27615.1	0.392825	0.347083	0.371315	0.415023	0.627603	0.588301
526.2466++	2	526.247	0	AK250233.1	FLTASGTFK	FLTASGT[+80]FK	119.77	AT5G56580.1	ATMKK6, ANQ1, MKK6 | MAP kinase kinase 6 | chr5:22904851-22906620 REVERSE LENGTH=356	57.81	0.9973	1.65577e-06	3.4399e-06	48522.7	69552.1	122910	189560	21974	69885.4	105351	52815.2	47228.1	84375.5	80380.7	179018	38805.3	102829	95229.3	37441.2	96590.4	121162	188777	181546	137892	7768.62	27913.9	19086.6	0.304885	0.201326	0.0187196	0.90276	0.834186	0.509961
446.8890+++	3	446.889	1	MLOC_43148.2	IGARSPGGTLSSR	IGARS[+80]PGGTLSSR	97.83	AT2G29200.1	APUM1, PUM1 | pumilio 1 | chr2:12549483-12553185 REVERSE LENGTH=968	51.45	0.9973	7.16143e-06	1.28059e-05	128510	26682.1	59699.3	40202.1	5938.25	21461.7	19596.1	19295.3	64252.3	80799.7	19503.3	3810.77	1851.12	25055.8	19367.1	9628.2	181695	78548.4	63655.9	3235.7	65827	19070.6	26373.5	37097.5	0.199366	0.17058	0.0942512	0.909186	0.90661	0.919575
790.3822+++	3	790.382	0	MLOC_65509.2	QISLPNSPMSSLLFSQQQQR	QIS[+80]LPNSPMSSLLFSQQQQR	97.03	AT3G22270.1	| Topoisomerase II-associated protein PAT1 | chr3:7874480-7877857 FORWARD LENGTH=782	87.97	0.9972	1.59588e-09	7.51456e-09	30684.9	24362.6	36917.2	18953.8	32977.3	39998.1	33403.6	8820.7	11317.2	29609.2	33714.9	51713.1	57860.8	48580.8	43596.3	22728.5	31833.8	19943.1	36529	29509	23889.8	15946.8	34786.4	44942.3	0.997421	0.240695	0.508358	0.824822	0.934999	0.447486
572.7554++	2	572.755	0	AK248877.1	SPSAASFLER	S[+80]PSAASFLER	115.6	AT3G53580.1	| diaminopimelate epimerase family protein | chr3:19864784-19866907 FORWARD LENGTH=362	74.91	0.9972	3.22849e-08	1.03296e-07	76182.4	100831	199707	113577	89405.6	84092.2	272393	173090	111294	196618	99299.3	140042	75654.9	151109	62924.2	97714.2	151745	338851	212265	158004	153902	47511.5	116459	108447	0.305341	0.264437	0.411471	0.775609	0.578249	0.592991
932.7513+++	3	932.751	1	AK376864	VLLQEGMHAVDNSSDLSDKEDIER	VLLQEGM[+16]HAVDNSSDLS[+80]DKEDIER	94.25	AT4G11740.1	SAY1 | Ubiquitin-like superfamily protein | chr4:7071955-7075256 FORWARD LENGTH=564	57.49	0.9972	1.78238e-06	3.66669e-06	41275.4	22079.4	37184.8	38047.3	21079	13134.9	18295.7	16492.3	13330.4	36228	29844.9	33402.9	24081.3	22515	29144.5	40512	34932.6	26981.7	34100.6	31164.4	24497.6	40556	40004.1	69434.2	0.894282	0.701063	0.665997	0.813224	0.449552	0.342651
681.3380+++	3	681.338	1	MLOC_61692.2	GPPPPAAPSAPLFSTDKSPK	GPPPPAAPSAPLFSTDKS[+80]PK	103.77	AT4G34490.1	ATCAP1, CAP 1, CAP1 | cyclase associated protein 1 | chr4:16484896-16487355 REVERSE LENGTH=476	99.72	0.9971	1.0666e-10	7.51132e-10	74259.4	324737	83450.7	92152.7	480459	164778	93683.6	147193	51418.5	203072	44245.6	170721	237867	114944	119804	80071.5	40726.2	75686.4	11687.2	36345.2	40180.6	9286.44	29944.2	314738	0.182493	0.732949	0.385699	0.366945	0.317705	0.653283
550.9172+++	3	550.917	0	MLOC_73299.1	GDATLGEGASESLHVK	GDATLGEGASES[+80]LHVK	119.87	AT2G36460.1	| Aldolase superfamily protein | chr2:15296929-15298387 REVERSE LENGTH=358	82.12	0.9971	6.13762e-09	2.41691e-08	3.79855e+06	102478	159086	42046.2	21560.5	261534	201053	48852.4	65020.7	326321	145040	204667	33638.6	196185	227336	18458.5	185620	217310	369106	176076	59158.4	103656	277726	53328.7	0.452702	0.455905	0.428065	0.0871357	0.0157807	0.901606
908.9275++	2	908.927	0	MLOC_57581.1	NLPQQPQSASPAEELK	NLPQQPQSAS[+80]PAEELK	119.86	AT3G60240.4	EIF4G, CUM2 | eukaryotic translation initiation factor 4G | chr3:22261842-22268295 FORWARD LENGTH=1727	80.88	0.9971	8.16582e-09	3.10831e-08	258976	292554	248509	79124.9	427129	392122	150084	81348.7	151586	140889	165781	83497.2	81913.3	259476	239982	63484.2	97073.6	37517.4	78129.8	53201	29193.1	61833	139336	28769.5	0.898331	0.945576	0.182698	0.735306	0.983838	0.435712
645.9576+++	3	645.958	1	MLOC_64326.1	KHTSLLSDDEEEIPDK	KHTSLLS[+80]DDEEEIPDK	119.27	AT2G40700.1	| P-loop containing nucleoside triphosphate hydrolases superfamily protein | chr2:16976783-16979392 FORWARD LENGTH=6	80.18	0.9971	9.59401e-09	3.5504e-08	35426.1	9603.15	25206.1	126746	11057.7	30769.3	24879.5	70679	38692.5	85375.1	25934.6	205839	26673.7	25244.6	18577.1	18448.5	54614.1	83320.6	39414.4	64531.6	34744.1	19918.7	22279.6	56515.3	0.585057	0.188941	0.162756	0.893745	0.784241	0.289377
727.8612++	2	727.861	0	AK376864	VAHPPSPTLTAQR	VAHPPS[+80]PTLTAQR	108.91	AT4G11740.1	SAY1 | Ubiquitin-like superfamily protein | chr4:7071955-7075256 FORWARD LENGTH=564	62.44	0.9971	5.70164e-07	1.31904e-06	102013	57020.4	165497	120417	69246	335112	476873	452266	194087	250700	131341	95375.7	241693	634444	605659	339723	127549	47599.5	263650	224650	468755	346140	689205	402018	0.780693	0.414018	0.914822	0.323573	0.0860549	0.369372
808.3384+++	3	808.338	1	AK370590	RSAATAWGSPSDASDAEADAGGHR	RSAATAWGSPSDAS[+80]DAEADAGGHR	119.95	AT3G04930.2	| DNA-binding storekeeper protein-related transcriptional regulator | chr3:1363029-1364651 FORWARD LENGTH=396	61.76	0.9971	6.66807e-07	1.51282e-06	15012	15030	18186	20251.8	10456.5	18903.7	11598.1	34022.2	65463.3	89381.1	25356.7	78933.3	39222.2	51017.2	28178	11748.7	58374	74025	56422.4	72624.3	87685.4	26780.6	16908.2	24513.5	0.66535	0.55673	0.682866	0.635933	0.363754	0.4408
803.0930+++	3	803.093	1	MLOC_74559.1	LRGPLPRPASLNAFDIISFSR	LRGPLPRPAS[+80]LNAFDIISFSR	92.87	AT4G18700.1	CIPK12, SnRK3.9, ATWL4, WL4 | CBL-interacting protein kinase 12 | chr4:10289110-10290579 REVERSE LENGTH=489	56.13	0.9971	2.43781e-06	4.83326e-06	20151.6	29297.1	29087.6	12373.4	45884.7	33111.2	48104.2	21985.5	27993.1	27419.1	50414.8	27871.5	107955	54120.4	39036.4	8489.68	31886.7	25083	31126	20075.5	17410.5	13441.1	31164.7	54395.5	0.886886	0.312662	0.328985	0.504961	0.582686	0.438468
607.7271++	2	607.727	0	AK374525	SLSMDSFMGK	SLS[+80]M[+16]DSFM[+16]GK	119.46	AT4G38900.3	| Basic-leucine zipper (bZIP) transcription factor family protein | chr4:18139564-18141520 REVERSE LENGTH=547	55.44	0.9971	2.85759e-06	5.54979e-06	79871.1	62456.8	62120.5	73809.4	66455	41964.3	45699.6	56486	37762.3	66522.8	95097.2	102714	108728	69588.1	45067.8	19650.2	92335.3	141170	144847	135701	54492	36527.7	78829.5	58624.9	0.557096	0.369854	0.255854	0.254999	0.38785	0.224779
1034.0027++	2	1034	0	MLOC_44066.1	MQGIQLGPIASPESFVQGK	MQGIQLGPIAS[+80]PESFVQGK	119.84	AT3G46920.1	| Protein kinase superfamily protein with octicosapeptide/Phox/Bem1p domain | chr3:17280430-17284857 REVERSE LENGTH=	92.83	0.997	5.21195e-10	2.86263e-09	26892.7	32115.7	50324.1	20105.3	56839.1	136319	65071.1	20219.5	30266.9	44153.3	50093.2	15252.5	20134.9	69815.6	119296	4851.9	30129.4	48411.6	24609.2	23094.6	68805.4	18676.1	64132.1	17838.4	0.130335	0.281255	0.0631405	0.55101	0.23936	0.155894
1088.9935++	2	1088.99	0	MLOC_61135.1	LELSAVPSSYYSGQLDPDR	LELSAVPSSYYS[+80]GQLDPDR	119.76	AT5G57330.1	| Galactose mutarotase-like superfamily protein | chr5:23218392-23220664 FORWARD LENGTH=312	77.67	0.997	1.71002e-08	5.88629e-08	29073.1	3674.32	29715.9	38592.6	3324.11	17854.3	27872.6	68855.9	15559.2	6671.65	10578.7	24115.6	36537.3	20175.7	16828.6	59135.8	65473	39146.2	34861.9	54224.8	32981.2	14095.2	23262	20334.9	0.359917	0.556249	0.903418	0.584069	0.896061	0.260357
638.2901++	2	638.29	0	AK251570.1	TLSFAGSNGVSR	TLS[+80]FAGSNGVSR	119.5	AT3G53390.1	| Transducin/WD40 repeat-like superfamily protein | chr3:19792781-19796428 FORWARD LENGTH=558	74.55	0.997	3.50752e-08	1.11332e-07	46828.9	58950.8	98560.1	71547.9	202338	357982	78954	51306.4	138516	98317.7	150644	162161	1.26773e+06	564570	103239	19448.3	1.31871e+06	582216	93110	342930	73405.2	203036	119086	155759	0.623004	0.444559	0.535919	0.756701	0.388282	0.368056
602.2739++	2	602.274	0	MLOC_71241.2	SFTSLAEAAAR	S[+80]FTSLAEAAAR	117.54	AT2G24550.1	| unknown protein; BEST Arabidopsis thaliana protein match is: unknown protein (TAIR:AT4G31510.1); Has 219 Blast hit	74.05	0.997	3.9355e-08	1.23058e-07	188891	124273	89133.5	119717	130165	115814	72955.3	67708.1	101981	207006	169823	137491	174730	102415	79024	53393.3	193315	346436	127034	133403	339929	46740.2	82139.9	55902.6	0.461193	0.450027	0.410426	0.200293	0.165273	0.134976
570.9293+++	3	570.929	2	MLOC_20614.2	RDQKYSFSTEELK	RDQKYS[+80]FSTEELK	119.77	AT5G45690.1	| Protein of unknown function (DUF1264) | chr5:18535139-18536259 REVERSE LENGTH=247	56.31	0.997	2.33884e-06	4.65089e-06	67270.3	69827.5	66402.8	71204.2	59782.3	85120	57764	50361.9	120297	125192	76621.2	90512.8	151712	86511.4	67107.1	17778.1	112291	446838	87735.2	190102	69134.3	18211.2	42117.5	24132.9	0.438155	0.321136	0.70967	0.472184	0.335293	0.178929
697.3071++	2	697.307	0	MLOC_544.3	VSSFEALQSAMK	VSS[+80]FEALQSAM[+16]K	119.74	AT1G74910.2	| ADP-glucose pyrophosphorylase family protein | chr1:28135770-28138456 REVERSE LENGTH=415	85.5	0.9969	2.81838e-09	1.23397e-08	19064	180332	352413	654828	49206.1	84020.4	188174	368226	108697	295236	384484	580624	224760	297075	256749	306037	136285	65955.7	325871	551508	203419	79952.8	260476	348825	0.305584	0.021031	0.00168534	0.955827	0.333371	0.0891316
625.6543+++	3	625.654	1	AK357977	LRLPTPSPSLSQQQSR	LRLPTPSPSLSQQQS[+80]R	109.68	AT2G03510.1	| SPFH/Band 7/PHB domain-containing membrane-associated protein family | chr2:1066717-1068934 FORWARD LENGTH=356	54.38	0.9969	3.64754e-06	6.94546e-06	32728.4	273185	40499	135981	10475.6	75703.6	36347.9	81752.2	212333	32229.4	48545.6	92150.4	71500.9	64865.6	38786.4	106306	118113	80710	30782.9	32259	42784.3	37139.3	22224.6	23572.2	0.937636	0.259923	0.607671	0.463077	0.668267	0.408487
578.7554++	2	578.755	0	AK376722	DFPISPSSAR	DFPIS[+80]PSSAR	109.87	AT5G57610.1	| Protein kinase superfamily protein with octicosapeptide/Phox/Bem1p domain | chr5:23325307-23329099 FORWARD LENGTH=	51.4	0.9969	7.24436e-06	1.29426e-05	261336	212315	243869	276708	276239	210703	46730	252625	162609	392058	193803	344768	444416	196329	143222	115443	187373	151966	123642	209960	66971.8	10248	9710.61	38213.9	0.598484	0.739908	0.230678	0.402181	0.233723	0.387018
568.7604++	2	568.76	0	AK370052	SFAAASFLSR	SFAAAS[+80]FLSR	119.82	AT3G18440.1	AtALMT9, ALMT9 | aluminum-activated malate transporter 9 | chr3:6328181-6330652 FORWARD LENGTH=598	47.99	0.9969	1.58855e-05	2.65068e-05	162897	22590	47362.7	26791.5	2214.26	12099.4	36290.9	14707.3	19374.3	73596.6	19323.8	25989.6	188009	17574.4	63287	5450.44	178827	41156.6	202557	20255.6	12003.2	46117.8	102505	42095.6	0.293634	0.714999	0.199005	0.562667	0.999465	0.526438
909.3956+++	3	909.396	0	AK248403.1	GISTDSASVNCLLGLEDDNASQHSR	GISTDSAS[+80]VNC[+57]LLGLEDDNASQHSR	119.76	AT2G01190.1	| Octicosapeptide/Phox/Bem1p family protein | chr2:115023-117296 FORWARD LENGTH=720	119.85	0.9968	1.03514e-12	1.44522e-11	5222.59	40079.1	107197	75724.6	6357.16	66310.4	35875.1	15518.7	605552	586850	79145.1	70400.6	29881.7	71465.2	69292.1	74956.7	2.00045e+06	131758	72162.8	103310	721575	33166.3	50769.1	406147	0.420896	0.315805	0.3144	0.492554	0.482841	0.763409
965.9365++	2	965.936	0	AK354749	MFGEVADVKPLLSGSWD	MFGEVADVKPLLS[+80]GSWD	95.22	AT1G16770.1	| unknown protein; Has 109 Blast hits to 109 proteins in 52 species: Archae - 0; Bacteria - 4; Metazoa - 0; Fungi -	113.14	0.9968	4.85289e-12	5.25137e-11	94951.4	120401	246093	33196.7	163978	273993	156596	111593	143902	71664.8	81529.9	29919.4	411396	132634	383076	144927	43656.7	17018.3	16996.3	19101.8	21433.8	54354	256987	104118	0.597521	0.806159	0.149959	0.752089	0.647131	0.563108
749.3347++	2	749.335	0	AK366555	LESSDSFSAPLHK	LESSDS[+80]FSAPLHK	119.9	AT1G59710.1	| Protein of unknown function (DUF569) | chr1:21938623-21939673 FORWARD LENGTH=300	82.69	0.9968	5.3827e-09	2.15794e-08	49647.9	85074.5	130785	229743	30689.6	91611.1	102722	111112	123764	229850	141327	154073	62727.4	97993.3	98029.6	82279.2	164141	84963.4	259561	94551.4	112889	43081.1	97440.3	122417	0.747085	0.310689	0.429431	0.785398	0.329717	0.305502
1151.8678+++	3	1151.87	0	MLOC_67581.1	LMPEPTAVALLYAQQQQQLMHDNMGSGIEK	LM[+16]PEPTAVALLYAQQQQQLM[+16]HDNMGS[+80]GIEK	119.85	AT2G32120.2	HSP70T-2 | heat-shock protein 70T-2 | chr2:13651720-13653411 REVERSE LENGTH=563	80.93	0.9968	8.07235e-09	3.07566e-08	208885	168919	241378	15108.2	267300	714539	324654	367736	80090.1	125957	333331	279868	57562.1	428209	436370	439562	94724.9	76731.1	78390.6	47618.9	38573.8	112518	239268	496850	0.939187	0.367986	0.896134	0.2558	0.106391	0.0624314
957.4404+++	3	957.44	1	MLOC_74793.3	TVFSESSPELHGAPMYDSERIPAAAK	TVFSESSPELHGAPMYDS[+80]ERIPAAAK	118.8	-	-	57.38	0.9968	1.8281e-06	3.75687e-06	365408	171036	57324.5	16731.3	571761	318132	133659	46932.4	17161.2	18629.2	135502	32056.5	13638.6	313279	95389.9	64085.3	39565.1	27011.9	34885.4	24982.6	30279.6	42140.5	77259.1	80601.3	0.633467	0.634199	0.410873	0.933529	0.631718	0.521837
900.3726++	2	900.373	0	MLOC_4571.1	MYSAASQQPMDYALK	M[+16]YS[+80]AASQQPMDYALK	119.64	AT4G11610.1	| C2 calcium/lipid-binding plant phosphoribosyltransferase family protein | chr4:7013956-7017846 REVERSE LENGTH=1011	51.72	0.9968	6.72977e-06	1.21263e-05	91350.9	43001	30811	120180	17964.3	39873.1	17594.4	16980.1	51258.9	39689.4	31066.1	168336	103745	40357.6	49971.5	19436.7	120828	50284.6	53400.8	107195	59393.6	19170.6	55709.4	19299.8	0.166723	0.148515	0.206305	0.400848	0.555433	0.233722
515.2363++	2	515.236	0	MLOC_19453.1	LDFGSVSPK	LDFGSVS[+80]PK	107.16	-	-	49.03	0.9968	1.25026e-05	2.12619e-05	51638.5	36128.5	112662	52043.8	38553.7	366819	111109	41151.6	44084.8	156723	44326.2	70921.9	430355	119569	55417.6	30125.7	207160	378774	123042	316018	137351	15875.9	126033	46082.7	0.487771	0.908469	0.681642	0.839511	0.474119	0.300532
752.3255++	2	752.325	0	AK376429	SLFDSVPGTPMEK	SLFDSVPGT[+80]PM[+16]EK	113.08	AT1G21630.1	| Calcium-binding EF hand family protein | chr1:7581457-7587796 FORWARD LENGTH=1218	41.13	0.9968	7.70903e-05	0.000110172	175639	167229	642039	1.05232e+06	419766	166366	155873	248487	50211.9	66901.5	124104	1.78979e+06	170479	383311	491759	399698	147529	3.38839e+06	91783.7	169285	1.72808e+06	874470	192880	1.04623e+06	0.425638	0.469055	0.20224	0.628367	0.424212	0.737902
1056.5159+++	3	1056.52	0	MLOC_14013.1	TVPAAVPAIVFLSGGQSEEEATLNLNAMNK	TVPAAVPAIVFLS[+80]GGQSEEEATLNLNAM[+16]NK	95.3	AT2G36460.1	| Aldolase superfamily protein | chr2:15296929-15298387 REVERSE LENGTH=358	103.49	0.9967	4.47713e-11	3.5898e-10	64177.7	58988.1	33398.7	35575.8	20360.9	31380.4	24754.7	42349.5	40015.9	18303.4	46468.1	19983.8	5638.26	32289.8	24164.8	12164.4	29429.8	43515.9	34796.1	23623.6	18018.3	7385.94	33628.7	24536.3	0.803127	0.62612	0.249813	0.406004	0.101599	0.322376
698.0039+++	3	698.004	0	AK364065	QAAAAAPAPAAAAPASPGGGPSPR	QAAAAAPAPAAAAPAS[+80]PGGGPSPR	110.56	AT3G19950.1	| RING/U-box superfamily protein | chr3:6942853-6943839 FORWARD LENGTH=328	102.53	0.9967	5.5847e-11	4.33004e-10	185817	128288	98470.4	72337	86677.2	143165	64678.8	45482.5	149308	187229	141813	218073	104674	104773	78780.7	48888.7	77767.1	51292.1	57365.8	177786	38178.3	68835.1	185150	59628.3	0.781106	0.407903	0.754478	0.393232	0.497433	0.340834
787.3537++	2	787.354	0	MLOC_54346.5	ITSGDMVMASPVSAK	ITSGDMVMAS[+80]PVSAK	119.27	AT1G55860.2	UPL1 | ubiquitin-protein ligase 1 | chr1:20879900-20892910 REVERSE LENGTH=3681	87.25	0.9967	1.88365e-09	8.73567e-09	122716	19831.6	176911	41533.1	20227.6	66291.9	45847.4	105124	29195.2	57377.7	46150.3	76110.5	219039	65043	74114.8	222167	105723	44979.5	42548.8	61083.9	200988	59420.2	68540.7	237741	0.280448	0.962964	0.47881	0.320587	0.320459	0.622417
715.6686+++	3	715.669	0	MLOC_5598.2	AHPGGPALSEFVWATGNTPR	AHPGGPALSEFVWATGNT[+80]PR	119.89	AT1G15340.1	MBD10 | methyl-CPG-binding domain 10 | chr1:5275895-5277474 REVERSE LENGTH=384	69.68	0.9966	1.07647e-07	3.00793e-07	125871	162210	225118	120841	127932	133276	123416	86259.8	146994	133572	243612	133856	159519	115328	153777	49624.3	68682.4	81231.2	129439	52398.3	57208.1	47110	243969	21822.9	0.746101	0.137079	0.760682	0.711038	0.300829	0.177797
823.8315++	2	823.831	0	AK354142	GFGFVTFGSEESMR	GFGFVTFGS[+80]EESM[+16]R	119.75	AT4G39260.3	CCR1, ATGRP8, GR-RBP8, GRP8 | cold, circadian rhythm, and RNA binding 1 | chr4:18274166-18274958 REVERSE LENGTH=92	66.82	0.9966	2.0797e-07	5.37839e-07	81826.6	50650.8	21460.6	25685.8	3664.14	51121.4	14924.7	236625	73100.3	21033.7	30421.9	54127.3	23682.5	71512.2	221315	3826.77	42651.8	36342.4	12892.6	37793.2	15812.1	13993.6	35192.6	12486.4	0.134051	0.0755144	0.162331	0.222425	0.367778	0.456767
681.3367+++	3	681.337	0	MLOC_68788.2	NVAPSPLVQEISVDQHTK	NVAPS[+80]PLVQEISVDQHTK	118.08	AT1G73960.1	TAF2 | TBP-associated factor 2 | chr1:27805173-27814433 REVERSE LENGTH=1390	40.06	0.9966	9.86279e-05	0.000137507	51605.1	38525.4	85687.8	97453	37971.6	35457.8	35492.7	21086.7	29143.5	117164	86228.3	54370	83103.4	31570.9	75064.2	49878.5	59160.1	154363	162926	43126.7	22541.1	62675.2	66746.5	61866	0.249511	0.139433	0.402207	0.836641	0.642041	0.879671
1159.9854++	2	1159.99	0	MLOC_74793.3	TVFSESSPELHGAPMYDSER	TVFSES[+80]SPELHGAPMYDSER	114.15	-	-	120.02	0.9965	9.95405e-13	1.39953e-11	1.57382e+06	700808	1.03429e+06	51335.1	2.18771e+06	232860	228359	496011	215856	1.37408e+06	173428	130712	1.04592e+06	158160	374176	347790	184625	666460	105474	133049	3.65505e+06	97595.3	266741	296378	0.667394	0.713976	0.351241	0.106024	0.117574	0.12715
879.8844++	2	879.884	0	AK362494	SMAEAAAAESLQASTPK	SM[+16]AEAAAAESLQAST[+80]PK	119.97	AT1G12970.1	PIRL3 | plant intracellular ras group-related LRR 3 | chr1:4423727-4425632 FORWARD LENGTH=464	113.64	0.9965	4.32514e-12	4.7973e-11	121752	19661.4	50081.9	52880.3	18970.8	24146.3	52482.6	87958.7	75091	156912	61263.3	59502.2	21764.7	39218.2	30940.2	44600	587997	266173	115758	392318	99334.8	19515.1	72297.8	161734	0.588527	0.376865	0.670016	0.553291	0.873455	0.319244
716.9648+++	3	716.965	0	MLOC_1248.1	MNSDSIYDMSGMTAHLPAK	MNS[+80]DSIYDMSGMTAHLPAK	119.9	AT5G56550.1	OXS3, ATOXS3 | oxidative stress 3 | chr5:22895847-22896502 REVERSE LENGTH=172	94.29	0.9965	3.72392e-10	2.15501e-09	131449	17325.6	46746.3	22089.9	32163.9	88583.1	23663.5	35196.6	137348	201431	27777	95701.3	78151.9	54258.1	119990	29550.4	92494	55843.4	77369.7	56933.8	41910.2	59307.4	61543.9	25726.2	0.666706	0.0406121	0.0925615	0.414467	0.629661	0.285651
898.4383+++	3	898.438	1	MLOC_2643.1	DMPEADIVVLPAGSPVTLDFRTNR	DMPEADIVVLPAGSPVTLDFRT[+80]NR	108.08	AT2G38870.1	| Serine protease inhibitor, potato inhibitor I-type family protein | chr2:16236546-16237050 REVERSE LENGTH=70	92.82	0.9965	5.22396e-10	2.86529e-09	87979.4	102499	122741	15293.6	136792	243366	95393.3	112970	81027	49254.3	84034.6	25357.1	139818	115846	162341	90173.6	37550.5	37985.1	15149.4	43826.8	31286.9	41919.6	135837	84391.7	0.839428	0.89763	0.10702	0.682172	0.532925	0.870454
588.2708++	2	588.271	0	AK366912	SFTSLAEAAAK	S[+80]FTSLAEAAAK	113.5	AT5G24890.1	| unknown protein; FUNCTIONS IN: molecular_function unknown; INVOLVED IN: biological_process unknown; LOCATED IN: ce	87.31	0.9965	1.8578e-09	8.62583e-09	986449	750671	659867	842360	750923	701182	512518	712048	659792	1.02162e+06	1.00914e+06	854292	987645	712655	561907	327103	323201	1.00539e+06	747594	722228	433973	307350	656290	404354	0.329189	0.543784	0.524639	0.522715	0.46821	0.308974
575.7263++	2	575.726	0	MLOC_64351.2	ASSWTFDEK	ASS[+80]WTFDEK	119.36	AT1G64110.3	| P-loop containing nucleoside triphosphate hydrolases superfamily protein | chr1:23796887-23801255 REVERSE LENGTH=8	74.41	0.9965	3.62243e-08	1.14524e-07	1.99517e+06	2.4341e+06	2.2176e+06	2.5034e+06	2.37778e+06	2.45197e+06	1.68556e+06	1.44433e+06	1.94658e+06	4.89191e+06	2.25583e+06	3.99088e+06	2.77472e+06	2.20069e+06	2.1811e+06	688058	901102	187918	395346	1.16247e+06	1.56233e+06	35785.4	133031	14308	0.590952	0.991054	0.403065	0.508333	0.29368	0.0684424
701.0194+++	3	701.019	2	MLOC_55003.1	AAALSPKLSPDVQDNNPRK	AAALSPKLS[+80]PDVQDNNPRK	119.62	AT1G19870.1	iqd32 | IQ-domain 32 | chr1:6895400-6898539 REVERSE LENGTH=794	67.97	0.9965	1.59588e-07	4.24823e-07	39340.4	33615.8	15773.8	28522.1	55859.8	16409.8	52400.2	21475	43556.8	47184.5	20809	56795.2	42277.1	25580.6	8896.01	26190.1	50000.9	204303	30093.3	31071	12821.1	37178.6	21099.6	18936.9	0.452711	0.0241304	0.622538	0.529501	0.636078	0.369755
961.2178++++	4	961.218	2	MLOC_56006.1	YEDLKEPIVAEPEPEPAMIPVTVEPEESPRAVGK	YEDLKEPIVAEPEPEPAM[+16]IPVTVEPEES[+80]PRAVGK	119.36	AT5G16880.2	| Target of Myb protein 1 | chr5:5549658-5551274 FORWARD LENGTH=407	65.63	0.9965	2.73527e-07	6.87346e-07	39888.5	50159.3	36404.1	53128.4	18165.6	34360.5	24158.2	38699.6	16138.9	25731	53361.2	62567.7	28247.4	25529.5	34561.8	16398.3	19479.6	26765.3	43687.3	45669.2	12789.9	9740.61	39336.3	51554	0.467138	0.118439	0.0485876	0.710282	0.135025	0.294192
834.9057++++	4	834.906	1	MLOC_64007.3	YDNENRPPSPAKPDTAEPPSRQEVLPVPR	YDNENRPPS[+80]PAKPDTAEPPSRQEVLPVPR	105.37	AT3G22380.2	TIC | time for coffee | chr3:7913181-7918967 FORWARD LENGTH=1555	45.07	0.9965	3.11172e-05	4.84976e-05	164731	201256	192821	34509.9	146158	138062	90009.5	147251	129010	150891	99006.5	231447	179090	152071	156127	11805.6	71257	19198.5	131327	64595.5	22757.5	23471.9	117179	145253	0.975372	0.650977	0.879756	0.866413	0.929835	0.83798
1086.4218++	2	1086.42	2	AK251612.1	KEEAKEESDDDMGFSLFD	KEEAKEES[+80]DDDMGFSLFD	114.23	AT5G24510.1	| 60S acidic ribosomal protein family | chr5:8369295-8369866 REVERSE LENGTH=111	37.37	0.9965	0.000183231	0.000239255	4194.83	43644.4	32939.7	23966.1	6090.58	10439.6	21177	6364.84	136562	31416.2	61368.9	38384.8	19336	46382.3	13951.7	42013.5	71172.9	24035.9	18540	42597.7	78342.2	20685.7	10661.7	42780.7	0.433011	0.497961	0.453357	0.756426	0.479603	0.878372
913.3999++	2	913.4	0	MLOC_5653.2	TTSETDLMTEYVVTR	TTSETDLMTEY[+80]VVTR	116.82	AT4G01370.1	ATMPK4, MPK4 | MAP kinase 4 | chr4:567219-568889 FORWARD LENGTH=376	72.33	0.9964	5.8479e-08	1.74259e-07	48312.4	54503.9	99699.3	52456.1	253032	58033	14879.8	16907.2	74437.1	54240.8	27978.6	38832.6	57780.5	83822.5	29702.2	391625	114382	65760.2	183470	57376.1	73130.5	38009.5	15484.3	120156	0.398067	0.663775	0.278234	0.399605	0.228081	0.73155
698.3487+++	3	698.349	2	MLOC_74717.1	EAAEPKKSPSASAAAPLYPK	EAAEPKKS[+80]PSASAAAPLYPK	112.76	AT4G24690.1	| ubiquitin-associated (UBA)/TS-N domain-containing protein / octicosapeptide/Phox/Bemp1 (PB1) domain-containing pro	70.09	0.9964	9.7949e-08	2.76208e-07	89809.2	113729	85796.8	37270.9	35077.3	146980	131442	67893.1	102356	167047	150065	55331.3	210312	131441	158285	10602.7	42627.8	21229.8	52996.6	49548	33718	16032.3	63099.3	12882.1	0.676361	0.631	0.244682	0.947631	0.742218	0.416332
617.9786+++	3	617.979	1	AK361510	NVKSEASVPSAGLASNLK	NVKS[+80]EASVPSAGLASNLK	119.94	AT4G30890.3	UBP24 | ubiquitin-specific protease 24 | chr4:15036383-15038825 REVERSE LENGTH=551	51.88	0.9964	6.48634e-06	1.17194e-05	36929.2	43691.3	86606.8	34190.7	33170.4	55150.9	108930	46558.7	50766.9	57928.1	74187.5	62339.1	34487.6	58798.1	77228.9	24727.2	162155	222631	135619	154098	54252.6	76197.4	72384.1	63839.9	0.745785	0.757206	0.996452	0.0945377	0.0419864	0.76076
906.6854++++	4	906.685	0	AK374192	APTPRPPPPASLQPDSPGVFFTNAAAAAPLGSAHR	APT[+80]PRPPPPASLQPDS[+80]PGVFFTNAAAAAPLGSAHR	119.88	AT1G11360.4	| Adenine nucleotide alpha hydrolases-like superfamily protein | chr1:3822171-3822899 REVERSE LENGTH=242	119.79	0.9963	1.04954e-12	1.46022e-11	221474	205297	297286	44328	49287.7	136856	24618.9	448015	256324	42190.7	461453	88594.9	54495.1	29755.4	356163	193878	69374.7	31772.6	17145.5	121666	50067	35530.1	356535	25112.3	0.347284	0.644733	0.254279	0.689249	0.220707	0.298619
689.3096++	2	689.31	0	MLOC_544.3	VSSFEALQSAMK	VSS[+80]FEALQSAMK	117.91	AT1G74910.2	| ADP-glucose pyrophosphorylase family protein | chr1:28135770-28138456 REVERSE LENGTH=415	93.88	0.9963	4.09261e-10	2.34123e-09	48126.8	125752	99962.9	22248.2	6006.25	70275.1	171274	249167	41330.2	151766	44585.4	133148	64029.7	128399	173355	176095	342515	345252	197146	435050	53430.5	92243.1	179630	143469	0.635642	0.808119	0.760623	0.108062	0.0177016	0.0258343
908.4553+++	3	908.455	0	AK376429	INIPTGAPQTNSVASPQQPTQALGPR	INIPTGAPQTNSVAS[+80]PQQPTQALGPR	117.37	AT1G21630.1	| Calcium-binding EF hand family protein | chr1:7581457-7587796 FORWARD LENGTH=1218	80.87	0.9963	8.18465e-09	3.10954e-08	147672	78699.2	55930.7	40682.2	100537	83819.8	27389.9	8345.61	108378	69774.2	82416	70419.4	70283.5	59094.4	54041	5428.43	76173.2	86592.1	69199.9	75942.1	50857.9	38756.6	45047.8	24391.7	0.266765	0.20003	0.130419	0.542358	0.149092	0.0593805
552.2603++	2	552.26	0	AK370914	VYSDSALIR	VYS[+80]DSALIR	109.47	AT3G55270.1	MKP1, ATMKP1 | mitogen-activated protein kinase phosphatase 1 | chr3:20496775-20499408 FORWARD LENGTH=784	69.48	0.9963	1.1272e-07	3.11266e-07	43110.3	37378.1	105236	687400	375274	48325	41124.1	16598.1	82015.7	87597.5	151800	164060	139777	50381.8	43175.2	28498.7	746267	127553	453029	1.97224e+06	162441	5442.44	15928.4	74522.4	0.463863	0.851301	0.380856	0.129553	0.125643	0.137237
721.0073+++	3	721.007	1	AK355750	VQNQNNGASEPKSPAPAPFK	VQNQNNGASEPKS[+80]PAPAPFK	114.95	AT1G62740.1	Hop2 | stress-inducible protein, putative | chr1:23231026-23233380 FORWARD LENGTH=571	47.42	0.9963	1.81134e-05	2.98624e-05	17921.7	14429.6	21880	24128.7	9896.17	71667.9	36347.4	32503.9	43547.9	29223.2	33930.9	28067.2	45327.5	62804.8	47165.7	1792.31	16902.5	29366.6	26346.8	66269.2	39982.8	16943.3	62238.5	13746	0.870104	0.9055	0.465316	0.422647	0.295861	0.34889
734.0177+++	3	734.018	0	MLOC_12347.1	ASGSPPVPVMHSPPRPVTVK	ASGS[+80]PPVPVMHS[+80]PPRPVTVK	115.23	AT1G77180.2	SKIP | chromatin protein family | chr1:28999791-29001632 REVERSE LENGTH=613	91.17	0.9962	7.63836e-10	3.9559e-09	348932	278671	72620.7	67306.1	721808	798044	18654.1	812168	437516	768320	839235	1.26067e+06	843397	560611	35867.8	91428.5	232212	163463	206375	310260	43512.8	46783.2	25134.7	23581.1	0.773857	0.904172	0.631955	0.851903	0.177158	0.567099
908.3701++	2	908.37	0	MLOC_4571.1	MYSAASQQPMDYALK	M[+16]YS[+80]AASQQPM[+16]DYALK	119.6	AT4G11610.1	| C2 calcium/lipid-binding plant phosphoribosyltransferase family protein | chr4:7013956-7017846 REVERSE LENGTH=1011	87.08	0.9962	1.95884e-09	9.03195e-09	60284.7	50212.9	37064.5	55737.9	13783.4	58210.5	61632.7	27182.9	35290.8	115977	94106.5	127939	84852.9	128774	59236.5	18947.8	309501	109767	75446.5	345773	90093.5	44458.1	56933.9	50999.6	0.6797	0.535297	0.759279	0.718084	0.896073	0.367217
709.3216++	2	709.322	1	MLOC_37645.1	RLLESPSGSAYAS	RLLES[+80]PSGSAYAS	119.7	AT3G02830.1	ZFN1 | zinc finger protein 1 | chr3:614075-615916 FORWARD LENGTH=397	70.1	0.9962	9.77237e-08	2.75767e-07	154536	162768	123939	135011	192494	197254	651359	189823	153413	201951	222556	145625	282245	218851	322499	100661	185531	124372	116555	94058.8	70749.4	96589.1	168556	128908	0.958231	0.803308	0.12742	0.888867	0.327927	0.592951
558.7943++	2	558.794	0	MLOC_56084.1	SPSPLLVPAR	SPS[+80]PLLVPAR	119.77	AT3G60820.3	PBF1 | N-terminal nucleophile aminohydrolases (Ntn hydrolases) superfamily protein | chr3:22472038-22473809 REVERSE L	67.48	0.9962	1.78649e-07	4.68997e-07	106557	117855	233330	146677	99252.8	78424.5	112413	76586.4	131457	117911	77395.9	83998.2	156179	92489.2	94416	12923.7	113786	289490	176148	61797.6	132713	43663.2	79227.9	26682.7	0.421715	0.432075	0.532878	0.0782255	0.172832	0.0377065
790.3447++	2	790.345	0	AK370769	VQSGVMTAETGTYR	VQSGVMT[+80]AETGTYR	119.82	AT4G35780.1	| ACT-like protein tyrosine kinase family protein | chr4:16946729-16950405 REVERSE LENGTH=570	59.49	0.9962	1.1246e-06	2.4339e-06	106282	57898.1	49806.5	433358	48033.7	53985.7	61730.1	8975.89	146315	45785.6	35448.7	83883.9	50030.3	40339.9	23740.1	8420.32	104057	156617	81451	127013	42251.5	30342.5	64263.6	44100	0.483884	0.0465081	0.478336	0.546008	0.835512	0.160615
853.4177+++	3	853.418	1	MLOC_13565.1	ITSHPLQQLEPSKSIEDDAEIK	ITSHPLQQLEPS[+80]KSIEDDAEIK	116.85	AT3G51800.3	ATG2 | metallopeptidase M24 family protein | chr3:19211261-19213568 REVERSE LENGTH=385	99.69	0.9961	1.07399e-10	7.52358e-10	722856	461388	357365	375657	360598	481726	714261	412424	238790	264316	412261	338189	535070	472927	438055	251292	232284	172123	397218	249259	118594	156860	390844	385472	0.627984	0.96093	0.689767	0.853519	0.344099	0.937104
692.6443+++	3	692.644	0	AK376172	TAGAAPAAAPHSWGSLDSNSK	TAGAAPAAAPHSWGS[+80]LDSNSK	119.71	AT3G01560.1	| Protein of unknown function (DUF1421) | chr3:219884-221707 FORWARD LENGTH=511	62.98	0.9961	5.03501e-07	1.18263e-06	36722.3	240503	75215.2	27734.7	36002.1	63970	44589.4	11676.3	77263.6	48574.6	59987.4	2.2634e+06	60413.9	59091.3	88792.2	2678.7	225217	107736	95188.3	173586	26308.3	25888.4	84195.7	34432.3	0.827094	0.596644	0.431193	0.616227	0.165329	0.17354
868.9055++	2	868.905	0	MLOC_60108.1	VVPSTGIGMAANSPPSR	VVPSTGIGM[+16]AANS[+80]PPSR	119.88	AT2G33620.4	| AT hook motif DNA-binding family protein | chr2:14234749-14236563 FORWARD LENGTH=351	88.68	0.996	1.35519e-09	6.50393e-09	24719.2	77957.2	125788	649020	43227.1	111236	81352.6	77770.4	66079	28304.2	85769.4	87959.2	37210.4	129322	166092	84031.6	137249	1.04283e+06	179919	49422.6	247644	29734	144883	90705.3	0.452542	0.291939	0.443587	0.82278	0.798739	0.750931
795.8961++++	4	795.896	1	MLOC_7525.4	SLVGTPASSALHSFEPHPIVGDAWEALRR	SLVGT[+80]PASSALHSFEPHPIVGDAWEALRR	119.92	AT4G09510.1	CINV2 | cytosolic invertase 2 | chr4:6021312-6023310 REVERSE LENGTH=558	85.62	0.996	2.74157e-09	1.2043e-08	95304.6	42392.9	245305	74273.4	19525.8	90781.6	100557	33910.7	151721	104757	181919	124044	318396	107158	174070	11805.1	78872.9	19663.8	402918	257356	31809.4	104709	113796	46147.4	0.213351	0.136145	0.539358	0.840359	0.956082	0.444968
434.2064+++	3	434.206	1	MLOC_55468.2	ISRDSYPNLR	ISRDS[+80]YPNLR	119.88	AT4G26270.1	PFK3 | phosphofructokinase 3 | chr4:13301094-13304030 REVERSE LENGTH=489	58.38	0.996	1.45211e-06	3.05817e-06	839920	815084	1.46404e+06	1.10278e+06	1.89209e+06	1.42406e+06	1.68638e+06	1.32234e+06	625497	1.54347e+06	1.09805e+06	1.29153e+06	1.87615e+06	1.77292e+06	1.85196e+06	766962	550983	989158	1.83902e+06	1.90877e+06	1.17126e+06	967566	1.91999e+06	1.01468e+06	0.200887	0.0749325	0.098233	0.494384	0.557152	0.122673
899.3244++	2	899.324	0	MLOC_13417.3	GNSSGDGEAMSMASGATR	GNSSGDGEAM[+16]SM[+16]AS[+80]GATR	94.78	AT2G34357.1	| ARM repeat superfamily protein | chr2:14499236-14505555 FORWARD LENGTH=1280	54.16	0.996	3.83707e-06	7.2579e-06	14369	202086	67746.3	18021.6	46317.2	23954.1	5096.21	3903.91	81548.3	265062	164177	56078.1	6029.41	38947.9	5345.57	7306.72	48063.2	87983.6	22508.6	31089.2	51819.5	13316.9	12092.1	13101.6	0.131589	0.507934	0.603884	0.624051	0.203672	0.21151
673.3474++	2	673.347	0	AK376648	NLLATPTVPSPR	NLLATPTVPS[+80]PR	116.71	AT3G18690.1	MKS1 | MAP kinase substrate 1 | chr3:6429755-6430423 REVERSE LENGTH=222	52.91	0.996	5.11682e-06	9.43716e-06	102354	92115.3	203346	116981	92430.4	80057.3	120274	66880.2	40254	157909	145990	179571	413672	180031	239838	42315.5	424167	207374	472183	272333	181648	120192	79246.2	31347.2	0.795774	0.623587	0.996094	0.413372	0.520599	0.198753
639.8263++	2	639.826	0	MLOC_6586.1	AAPSIVSPLSTR	AAPSIVS[+80]PLSTR	109.4	AT5G06110.2	| DnaJ domain ;Myb-like DNA-binding domain | chr5:1841009-1843000 REVERSE LENGTH=663	50.61	0.996	8.6896e-06	1.52517e-05	30174.4	104545	34812.2	55227.3	13693.6	42615.6	62776.8	32330.3	75019.1	30826.1	117698	32530.9	43876.6	70312.3	57302.2	29112.6	840387	420552	175958	583163	163836	18003.2	29125.3	47957.6	0.696951	0.520342	0.792519	0.595944	0.659688	0.504026
786.3442++	2	786.344	0	MLOC_69630.1	GNIPGSPEADLYMK	GNIPGS[+80]PEADLYMK	102.43	AT2G23140.2	| RING/U-box superfamily protein with ARM repeat domain | chr2:9845696-9848762 REVERSE LENGTH=826	28.3	0.996	0.00147911	0.00159581	44290.3	51541.9	30086.8	64459.5	12621.8	504528	9890.41	31048.8	76643.5	53484.8	40822.1	35458.6	20815.6	21633.3	34996.9	20651.2	87479.3	46768.8	76275.9	38379.2	35133.3	102922	174771	30166.2	0.287062	0.362624	0.238272	0.337604	0.432815	0.608803
500.7342++	2	500.734	1	AK355909	RLEYSPR	RLEYS[+80]PR	102.58	-	-	56.43	0.9959	2.2751e-06	4.54906e-06	59498.9	30024.7	15895.8	76905.7	1724.62	5390.7	60937.8	1344.17	95990.9	102716	88178.2	22119.4	11769.3	41429.2	1175.51	1718.79	84596.9	95089.6	39909	64980.8	25752.6	15689.4	9573.9	5716.1	0.88725	0.311056	0.290731	0.58693	0.641894	0.289197
964.8278+++	3	964.828	1	AK374423	VEVPASPQPVMPTRVEVPAALEPVQR	VEVPAS[+80]PQPVM[+16]PTRVEVPAALEPVQR	119.84	AT2G01710.1	| Chaperone DnaJ-domain superfamily protein | chr2:315836-316771 FORWARD LENGTH=311	50.67	0.9958	8.57038e-06	1.50557e-05	71074.4	59129.6	60268.3	58872.3	24822	57700.4	38712.5	379479	23510.7	47966.9	79640.5	49557.2	33629.5	30310.5	59877.5	49288.3	29665.4	27330.7	40644.4	32660.3	11341.3	18483.7	48509.2	82382.3	0.859484	0.389561	0.769946	0.425497	0.0629171	0.296806
992.9017++	2	992.902	0	AK370995	FGSFTPGSDSPEYEQTR	FGSFTPGSDS[+80]PEYEQTR	119.76	AT3G13990.2	| Kinase-related protein of unknown function (DUF1296) | chr3:4625708-4630383 REVERSE LENGTH=847	82.91	0.9957	5.11682e-09	2.06587e-08	42555.4	46624.6	43037	35751.9	532413	57961.2	30298.2	35427.8	26308	35014.1	24353.5	28103.2	55156.1	47095	30575.6	137528	66614.9	196266	58532.4	38208.2	50843.3	29136.9	35570.7	606255	0.466543	0.848619	0.454387	0.403786	0.375638	0.856006
672.3214++	2	672.321	0	MLOC_68734.1	TLLANYSQTPR	TLLANYSQT[+80]PR	119.72	AT1G09770.1	ATCDC5, CDC5, ATMYBCDC5 | cell division cycle 5 | chr1:3162002-3165122 FORWARD LENGTH=844	73.8	0.9957	4.16869e-08	1.29336e-07	135477	148129	433612	137740	177870	117955	130178	63802.3	180505	216826	150904	176518	334733	114607	106238	290363	405349	326083	313384	579645	80750.3	89674.5	122097	213245	0.924625	0.649408	0.749099	0.349078	0.402706	0.936208
850.8800++	2	850.88	0	MLOC_77133.1	HTGDATSFTISDLGAK	HTGDATSFTIS[+80]DLGAK	119.48	AT3G12490.1	ATCYSB, ATCYS6, CYSB | cystatin B | chr3:3960523-3961777 REVERSE LENGTH=201	68.59	0.9957	1.38357e-07	3.75822e-07	56118.9	50241.6	71850.8	71472.6	15671.2	59510.7	50189.8	20150.5	42772.7	28059.1	67202.2	56975.2	22942.7	44431.1	65740.4	15633.2	100821	41084.4	41231.9	63573.9	38128.3	22815.7	83362.4	36073.8	0.288443	0.767033	0.900048	0.275634	0.0392488	0.868917
591.7322++	2	591.732	0	AK374525	SLSMDSFMGK	SLS[+80]MDSFMGK	119.8	AT4G38900.3	| Basic-leucine zipper (bZIP) transcription factor family protein | chr4:18139564-18141520 REVERSE LENGTH=547	42.9	0.9957	5.12861e-05	7.61851e-05	6658.2	2422.78	22851	3331.69	11340.6	36839.8	28836.6	16729.9	20347.2	49693.2	8448.39	5326.31	43814.4	20526.3	38415	17256.4	111914	15103.3	25597.2	8259.14	49321.9	28337.7	543768	20782.7	0.574414	0.499782	0.343846	0.672173	0.426358	0.298947
855.8286++	2	855.829	1	AK375664	EQMGEEGYSEMGRK	EQMGEEGYS[+80]EMGRK	119.68	AT2G40170.1	ATEM6, GEA6, EM6 | Stress induced protein | chr2:16779792-16780167 REVERSE LENGTH=92	32.72	0.9957	0.000534564	0.000630767	16253.5	7443.3	16100.1	27623	9156.27	15273.1	8952.93	6252.72	48976.2	11728.6	23466.4	39043.9	40823.2	30683	31211.7	6632.99	45625.6	94017	45582.3	67185.9	37782.8	26191.6	13164.9	17734.4	0.981685	0.574887	0.658666	0.684677	0.415546	0.218911
961.6913++++	4	961.691	0	MLOC_62815.3	ASSLSELGFDAGGASSGFFRPVADGCPATPTSSAVPHR	ASSLSELGFDAGGASSGFFRPVADGC[+57]PAT[+80]PTSSAVPHR	119.82	AT4G17260.1	| Lactate/malate dehydrogenase family protein | chr4:9674057-9675309 FORWARD LENGTH=353	91.87	0.9956	6.5013e-10	3.47055e-09	56543.9	29903.2	28756.2	24104.2	68865.2	58775.3	36931.9	62252.9	45450.9	24837	22487.1	24679.2	36678.3	65246.4	49211.5	11468.7	17501.1	37096.3	18288.6	13371.5	67323.5	20862.5	51528.5	64079.7	0.527126	0.299779	0.257247	0.628417	0.412224	0.603015
806.3667++	2	806.367	0	MLOC_80715.2	SHSGESESIVASTLK	SHS[+80]GESESIVASTLK	113.06	AT1G68720.1	TADA, ATTADA | tRNA arginine adenosine deaminase | chr1:25804547-25808820 FORWARD LENGTH=1307	80.6	0.9956	8.70964e-09	3.26857e-08	88469.4	221936	381916	110670	60266.5	79794.9	115844	36902.5	99727.3	261796	136281	197714	124316	85343.8	93162.7	22787.4	102545	49035.1	384082	141536	76306.6	20335.8	160378	21576.8	0.342895	0.131725	0.176423	0.440401	0.280931	0.0946655
734.3658++	2	734.366	1	MLOC_74717.1	KSPSASAAAPLYPK	KS[+80]PSASAAAPLYPK	119.93	AT4G24690.1	| ubiquitin-associated (UBA)/TS-N domain-containing protein / octicosapeptide/Phox/Bemp1 (PB1) domain-containing pro	67.69	0.9956	1.70216e-07	4.49221e-07	213849	70878.2	71095.5	33173	124586	119298	57676.1	42505.9	86922.7	115136	82473.6	29750.3	158631	68840	89505.6	51435.7	32533.4	50238.1	114236	69413.7	86282.6	72015.4	85479.6	39175.4	0.627707	0.730872	0.348762	0.262887	0.187836	0.0654578
587.3133+++	3	587.313	1	MLOC_61686.3	ARSPLPSRPVPEVFK	ARS[+80]PLPSRPVPEVFK	111.61	AT5G58950.1	| Protein kinase superfamily protein | chr5:23801136-23803025 REVERSE LENGTH=525	56.15	0.9956	2.42661e-06	4.81583e-06	64051.1	89468.8	91166.9	207067	76849	118112	71003	120169	130491	137741	121114	201792	159964	106783	75247.4	36885.8	49190.7	18998.4	139187	68731.9	72075.3	171899	11067.8	116459	0.985754	0.298821	0.22873	0.462697	0.247375	0.784251
669.3029++	2	669.303	0	MLOC_60302.1	SVDEVSAPQTPK	SVDEVSAPQT[+80]PK	99.62	AT1G34220.2	| Regulator of Vps4 activity in the MVB pathway protein | chr1:12463102-12465911 REVERSE LENGTH=619	43.61	0.9956	4.35512e-05	6.58712e-05	50651.8	16801.7	96630.1	53092.8	48289.4	33720.1	59193.2	48643.4	24162.3	28710.9	26254.3	139605	76446.3	11795.9	24625.1	6782.11	61472.8	80216.7	46956.8	143862	49107.5	55888.5	35307.1	64204	0.885109	0.668421	0.168853	0.222472	0.277602	0.422065
686.3575+++	3	686.358	0	AK357996	LVAGFNGHAAPASAPAVLSVK	LVAGFNGHAAPAS[+80]APAVLSVK	117.41	AT1G07530.1	SCL14, ATGRAS2, GRAS2 | SCARECROW-like 14 | chr1:2313828-2316137 REVERSE LENGTH=769	42.15	0.9956	6.09537e-05	8.93167e-05	50632.1	39035	27519.4	18946.2	27400.8	39780.5	135624	32655.9	47185.5	83836.8	49623.8	63447.6	74389	28374.9	40789.9	55737.7	182392	59415	46491.6	105494	14877.5	18592.2	18899.3	29847.8	0.554257	0.366189	0.589086	0.65397	0.580751	0.981346
1032.4662+++	3	1032.47	2	MLOC_57175.1	RSKTPASLQSQETQEEPYAYQDETTK	RSKT[+80]PASLQSQETQEEPYAYQDETTK	119.9	AT3G45980.1	H2B, HTB9 | Histone superfamily protein | chr3:16897492-16897944 REVERSE LENGTH=150	181.66	0.9955	6.82339e-19	1.1846e-16	1.77246e+06	2.02301e+06	1.20766e+06	195095	2.10906e+06	2.09484e+06	1.02677e+06	99572.2	1.08644e+06	1.06546e+06	1.55852e+06	100635	1.24205e+06	1.71819e+06	1.23115e+06	67073	240939	196054	877111	104813	199202	469668	1.58561e+06	105797	0.934422	0.744467	0.179933	0.762844	0.880817	0.186455
920.0907+++	3	920.091	2	MLOC_64351.2	RNASTSSDMSSLASQGTPSNSAPLRR	RNAS[+80]TSSDMSSLASQGTPSNSAPLRR	119.86	AT1G64110.3	| P-loop containing nucleoside triphosphate hydrolases superfamily protein | chr1:23796887-23801255 REVERSE LENGTH=8	133.24	0.9955	4.74242e-14	1.1205e-12	274495	371522	854573	40842.2	804136	916836	844395	1.34633e+06	435975	566007	263434	271983	572348	884777	1.52681e+06	585831	470281	63184.4	192904	287902	108541	501098	1.49735e+06	804432	0.741141	0.860833	0.148906	0.345778	0.0784813	0.264593
884.4286++	2	884.429	0	AK364823	VLVPGEPNIAYICSR	VLVPGEPNIAY[+80]IC[+57]SR	119.85	AT4G18710.1	BIN2, DWF12, UCU1, ATSK21, SK21 | Protein kinase superfamily protein | chr4:10296474-10298913 FORWARD LENGTH=380	95.86	0.9955	2.59418e-10	1.58146e-09	57580.2	36695.4	69052	55947	67646.5	81797.3	151612	60869.5	45844.1	26525.1	35962.3	70502.3	44984.8	36837.1	34474.7	16252.1	27446.5	26769.9	50967.7	35200.5	28293.9	15702.8	38607	45924.1	0.283733	0.564855	0.50207	0.928656	0.557679	0.754243
629.2974++	2	629.297	1	MLOC_37072.1	SVSEPDFIRK	SVS[+80]EPDFIRK	119.42	AT5G47490.1	| RGPR-related | chr5:19264675-19270487 FORWARD LENGTH=1361	55.38	0.9955	2.89734e-06	5.62152e-06	498051	500700	264782	190965	588830	578669	305714	57404.5	399963	617570	497509	253407	680888	417732	325641	19620.7	297536	440748	494221	277915	267783	197825	323903	998117	0.217093	0.846493	0.130648	0.542238	0.261704	0.697734
968.4940++++	4	968.494	1	MLOC_64927.3	GVLAADIGQLTELQSLDLSFNKDLGGVLTPTIGNLK	GVLAADIGQLTELQS[+80]LDLS[+80]FNKDLGGVLTPTIGNLK	119.64	AT1G79620.1	| Leucine-rich repeat protein kinase family protein | chr1:29957633-29962174 REVERSE LENGTH=971	48.36	0.9955	1.45881e-05	2.45265e-05	73118	95049.6	17123	114040	6392.52	34163	15636.1	43242	147470	177440	212565	105067	242952	81756.6	42222.8	18347.6	485952	42994.7	79888.5	679967	15083.6	142406	2395.27	7569.45	0.430209	0.442965	0.797233	0.982785	0.476504	0.492591
479.8964+++	3	479.896	1	MLOC_72883.3	RAPSHELSPHAR	RAPSHELS[+80]PHAR	98.74	AT1G07350.1	| RNA-binding (RRM/RBD/RNP motifs) family protein | chr1:2257732-2260101 REVERSE LENGTH=382	38.44	0.9955	0.000143219	0.00019242	26118.1	2585.32	3375.15	5066.54	10502.8	5703.99	8588.52	617.607	12813.6	617.99	336.976	6483.32	383.566	19163.6	7056.75	3384.41	11315.6	30732.5	5853.01	124309	6110.86	19867.1	10623.7	13196.7	0.66476	0.112073	0.547727	0.188998	0.42462	0.989735
772.3374++	2	772.337	0	AK365593	EVVSYPLGGSGGVGAD	EVVSYPLGGS[+80]GGVGAD	117.87	AT5G40190.1	| RNA ligase/cyclic nucleotide phosphodiesterase family protein | chr5:16069298-16069849 REVERSE LENGTH=183	35.61	0.9955	0.000274789	0.000345912	75667.7	86872	26236.3	63055.7	10154.6	105364	77665.6	53387.9	76589.6	96481.3	92458.1	114782	49298	40648.7	52009.3	60435.5	258789	156471	50970	156666	111967	33114.2	65293.1	39666.4	0.748724	0.334898	0.738661	0.949665	0.821309	0.861737
993.1507+++	3	993.151	1	MLOC_59875.1	RSQLSASAAAAAVVAAEEAATNTAASASPPR	RSQLSASAAAAAVVAAEEAATNTAASAS[+80]PPR	119.2	AT5G12010.1	| unknown protein; INVOLVED IN: response to salt stress; LOCATED IN: chloroplast, plasma membrane, membrane; EXPRESS	114.43	0.9954	3.60579e-12	4.07873e-11	6884.79	12034.5	22761.8	68919.8	10124.7	17167.5	13827.5	67018.9	14952.6	26438.5	32115.4	22910	12113.4	10780.7	7965.04	31147.9	25306.9	23147.1	15614.7	34163	11718	5627.33	7783.01	53220.8	0.53392	0.356532	0.21853	0.973569	0.55471	0.0646139
720.8401++	2	720.84	0	MLOC_74793.3	SLSEAITGAVQER	SLS[+80]EAITGAVQER	119.04	-	-	83.46	0.9954	4.50817e-09	1.86734e-08	24285.7	28666	49321	28186	259164	46229.2	47706.9	24191.2	34902.1	28716.7	53905.6	104846	72478.8	77499.4	81144.6	10623	24888.6	36544.8	56114.6	59113.7	54556.5	32277.4	37978.4	21849.5	0.502914	0.00807733	0.250981	0.369377	0.387408	0.235797
705.3010++++	4	705.301	0	AK357485	NCDQSRPADHTAMQTPPHYSVPGR	NC[+57]DQSRPADHTAM[+16]QT[+80]PPHYSVPGR	109.84	AT1G67325.1	| Ran BP2/NZF zinc finger-like superfamily protein | chr1:25209825-25212412 REVERSE LENGTH=287	68.54	0.9954	1.39959e-07	3.79399e-07	131282	38621	41167.3	150994	33096.9	127525	86549.2	138592	98289.4	78722.6	103091	168477	88018.5	169212	95017.9	13924.8	153856	159917	243809	223471	53359.7	14454.8	33034.1	240274	0.461507	0.98239	0.14508	0.45001	0.632004	0.393111
919.4038++	2	919.404	0	AK364999	SISSSQFFGDQANLEK	S[+80]ISSSQFFGDQANLEK	119.51	AT4G17890.1	AGD8 | ARF-GAP domain 8 | chr4:9937121-9939146 FORWARD LENGTH=413	146.59	0.9953	2.1928e-15	9.41491e-14	134019	66465.8	131320	162187	239755	167903	323765	50296	103897	56156.4	264790	92308.6	112057	73146.2	303526	29724.5	90948.2	41249.6	97207.8	81665.6	52885.2	53085.1	260821	27196.5	0.0333671	0.407494	0.939332	0.613123	0.109378	0.216576
729.8405++	2	729.84	0	MLOC_1003.1	SSSIGNGVQFLNR	SSS[+80]IGNGVQFLNR	116.09	AT4G02280.1	SUS3, ATSUS3 | sucrose synthase 3 | chr4:995166-998719 FORWARD LENGTH=809	106.79	0.9953	2.09411e-11	1.85406e-10	103378	80718.5	95525.9	98944.8	248016	69524.3	79761.7	62719.7	58154.4	232498	93242.4	90519	104788	84816.9	50423.8	55393.3	169595	176530	153635	108190	50905.8	52393.9	76868.6	67462.9	0.406347	0.927289	0.765854	0.385198	0.385787	0.342524
653.7620++	2	653.762	0	MLOC_67837.1	SSSATMLDMQR	SSS[+80]ATMLDMQR	119.86	AT1G24300.2	| GYF domain-containing protein | chr1:8614515-8620420 REVERSE LENGTH=1490	101.5	0.9953	7.07946e-11	5.33364e-10	170830	63083.1	56219.7	37337.8	33888.5	47563.3	38771.4	26496.3	145810	112241	92289.1	98691.7	24839.3	71378.6	42556.8	10252.9	474322	541208	290217	71714.5	155573	37403.8	39559.3	32438.2	0.90178	0.427317	0.211054	0.699371	0.53714	0.374543
830.8749++	2	830.875	1	AK358180	KDSSESLGSDLSSLR	KDS[+80]SESLGSDLSSLR	115.83	AT4G32160.1	| Phox (PX) domain-containing protein | chr4:15529056-15532892 FORWARD LENGTH=723	91.93	0.9953	6.4121e-10	3.4321e-09	51526.5	34884.6	82666	63971	28663	48392.1	99594.9	195036	39366.5	37857.4	54315.5	42317.7	87184.6	44163	100314	24890	106519	131504	87092.6	53023.1	68568.2	30822.4	50318.4	247794	0.955799	0.737163	0.615843	0.376836	0.426576	0.306834
1208.8520+++	3	1208.85	0	AK355323	HVSGGYAPSPFFPDSDFGGGDDDGPVLPPPAEMGR	HVS[+80]GGYAPSPFFPDSDFGGGDDDGPVLPPPAEMGR	99.95	AT2G40060.1	| Clathrin light chain protein | chr2:16726564-16728001 FORWARD LENGTH=258	90.21	0.9953	9.52796e-10	4.7616e-09	35084	10952.2	117558	28561.1	35088.2	73553.1	66934.6	22404.3	16777	15650.9	54252.1	5692.67	21184	39702.3	147960	25504.4	39805.5	18002.5	26547.7	21630.6	15333.3	19877.9	132152	22875.8	0.165434	0.32962	0.308725	0.344982	0.069126	0.96742
951.8698++	2	951.87	0	MLOC_54346.5	DASNASEHVADMQYER	DAS[+80]NASEHVADMQYER	119.83	AT1G55860.2	UPL1 | ubiquitin-protein ligase 1 | chr1:20879900-20892910 REVERSE LENGTH=3681	65.09	0.9953	3.09742e-07	7.68198e-07	16480.1	24702	22142.5	5461.94	9028.42	18318	17727.2	6063.32	83105.4	81649.6	28350.1	178492	94818	34958.9	28612.5	10005.4	64958.6	306699	28751.6	50498.9	24564.2	22907.1	23677.4	12039.8	0.447472	0.291058	0.71544	0.583288	0.540149	0.333577
621.3118+++	3	621.312	0	AK355669	TFRPGTTSLPSPAGPAPK	TFRPGTTSLPS[+80]PAGPAPK	119.89	AT2G03780.1	| Translin family protein | chr2:1152716-1154285 REVERSE LENGTH=287	53.89	0.9953	4.08319e-06	7.66174e-06	57986.3	125937	111693	21025.6	103426	263972	369428	172945	144005	192955	134842	63197.1	439910	268627	374163	173050	74375	200559	111170	81184.4	142159	166483	286603	296463	0.106442	0.428116	0.329286	0.971263	0.405996	0.911357
688.3233+++	3	688.323	0	AK367973	SQLGAVSLASDHASATASPGR	SQLGAVSLASDHASATAS[+80]PGR	119.29	AT2G46090.1	| Diacylglycerol kinase family protein | chr2:18950919-18953079 FORWARD LENGTH=364	100.08	0.9952	9.81748e-11	7.0253e-10	38122.9	43254.3	54638.6	18546.5	31317.9	38899.3	59164.7	33934.2	57657.9	100757	75131.2	156029	60827.8	38777.9	92705.5	10504.6	116411	359766	91178.6	37907.2	26547.7	69961.7	58075.3	39736.1	0.434168	0.92024	0.998549	0.563864	0.146732	0.470114
840.8723++	2	840.872	0	MLOC_64351.2	MSGLLQSFTMTPQK	M[+16]SGLLQS[+80]FTM[+16]TPQK	117.41	AT1G64110.3	| P-loop containing nucleoside triphosphate hydrolases superfamily protein | chr1:23796887-23801255 REVERSE LENGTH=8	51.68	0.9952	6.79204e-06	1.22165e-05	30616.4	20957.9	30624.7	38270.8	33711.7	61407.4	245847	9606.8	149757	186549	42244.8	82241.5	54580	133385	28220.2	20137	230462	213941	231592	282407	117505	109967	30633	83805.6	0.96894	0.711699	0.979571	0.390116	0.708201	0.435183
803.8485++	2	803.849	0	AK371248	APSEYVVGGGGTGGYR	APS[+80]EYVVGGGGTGGYR	119.88	AT4G16280.3	FCA | RNA binding;abscisic acid binding | chr4:9208564-9214412 REVERSE LENGTH=533	39.49	0.9952	0.00011246	0.0001549	32815.6	28820	64878.6	412483	21911.4	301626	45736.1	21290.7	32387.9	887568	388803	1.30575e+06	446472	59365.7	128652	11980.4	238655	394647	217008	205689	28316.8	16995.4	28006.8	27742	0.323046	0.369476	0.257472	0.82705	0.565637	0.410018
634.8285++	2	634.829	1	AK375372	KLVSVASEVEK	KLVSVAS[+80]EVEK	118.57	AT3G14750.1	| unknown protein; BEST Arabidopsis thaliana protein match is: unknown protein (TAIR:AT1G67170.1); Has 4036 Blast hi	35.15	0.9952	0.000305492	0.00038084	31837.4	38983.4	302691	55176.5	115629	31734.6	76011.3	23183.4	85325.2	65320.5	54508.5	31766.8	37813.8	27038.3	27511.8	25557.1	271054	254087	52785.1	51778.1	38361.5	19058.2	19683.5	33695.3	0.926502	0.951648	0.371906	0.282919	0.517698	0.29651
938.4261+++	3	938.426	0	MLOC_68317.1	AGSSDDGYLPVTGAGHAVGEGGGHQLPAR	AGS[+80]SDDGYLPVTGAGHAVGEGGGHQLPAR	114.81	AT5G06760.1	LEA4-5 | Late Embryogenesis Abundant 4-5 | chr5:2089754-2090313 REVERSE LENGTH=158	170.88	0.9951	8.16582e-18	9.59004e-16	130938	299912	409568	765748	107813	218663	214846	687902	31985.7	127908	399773	346006	198936	264444	763183	431942	226378	41352	220465	194258	35060.4	14787.5	34291.3	41805.1	0.796391	0.0828424	0.231486	0.604494	0.423895	0.293806
1135.2188+++	3	1135.22	0	AK355067	LHTYVLPTPNDVQATSQTIAGNPTSGSPIESK	LHTYVLPTPNDVQATSQTIAGNPTSGS[+80]PIESK	119.31	AT2G33490.1	| hydroxyproline-rich glycoprotein family protein | chr2:14183552-14187666 FORWARD LENGTH=623	144.93	0.9951	3.21366e-15	1.24584e-13	142251	114308	94535.8	52644.1	24375.9	132741	95816.1	121701	22198.6	18538.2	79308.3	14364.7	53902.4	97843	123809	75006.9	38879.9	39723.3	45375.5	19466.7	15370.8	33973.1	139877	111804	0.842845	0.90737	0.427237	0.209128	0.0145264	0.0299171
835.0511+++	3	835.051	0	MLOC_36358.1	NYQAISTISHISFAEDESVSPK	NYQAISTISHISFAEDESVS[+80]PK	119.51	AT1G35780.1	| unknown protein; BEST Arabidopsis thaliana protein match is: unknown protein (TAIR:AT1G78150.2); Has 145 Blast hit	135.41	0.9951	2.8774e-14	7.71104e-13	83198	39989.2	63473	90671.9	65911	57126.3	178152	63758	55435.8	31551.3	49193.7	63416.3	27550	32152.1	46825.6	24949	79010	45040	50336.8	59683.8	18128.6	28003.4	50578.1	81008.5	0.0710714	0.159474	0.927406	0.919182	0.353201	0.445148
929.4282++	2	929.428	0	AK359592	GPEVQQAPPSPSQVSNR	GPEVQQAPPS[+80]PSQVSNR	117.39	AT5G21160.1	| LA RNA-binding protein | chr5:7199191-7203879 REVERSE LENGTH=826	103.6	0.9951	4.36516e-11	3.51413e-10	644045	430188	5.62459e+06	186316	1.15875e+06	937474	1.21853e+07	878529	645039	626095	341301	206959	157397	850516	654064	216530	770327	217100	1.93832e+06	891027	1.10002e+06	3.11663e+06	4.71965e+06	425617	0.171705	0.339246	0.38673	0.413118	0.27515	0.48814
871.3982++	2	871.398	0	MLOC_61230.2	TLTTPGTLTDLDEER	TLT[+80]TPGTLTDLDEER	118.24	AT1G06410.1	ATTPS7, TPS7, ATTPSA | trehalose-phosphatase/synthase 7 | chr1:1955413-1958153 FORWARD LENGTH=851	99.45	0.9951	1.13501e-10	7.90942e-10	38464.9	74197.8	95403.4	87336.8	23739.4	620428	796193	28489.7	43249	37198.3	91676.6	92772	39675.6	73175.4	60350.1	42629.5	47669	60417.9	109639	51344.8	57770.1	22613.6	61385	286528	0.331236	0.0116896	0.124324	0.409447	0.392126	0.448631
813.3434+++	3	813.343	0	MLOC_66645.3	ANSGNFSSSYPDVNTAHAHEPR	ANS[+80]GNFSSSYPDVNTAHAHEPR	119.85	AT2G24350.1	| RNA binding (RRM/RBD/RNP motifs) family protein | chr2:10361239-10364223 FORWARD LENGTH=537	89.16	0.9951	1.21339e-09	5.92306e-09	35998.1	65816.6	89273.5	53716.8	50139.1	77907.5	55079.9	19823	35261.6	61875.4	156374	49186.1	55359.3	52487.4	61518.8	27551.7	57869.2	78169.1	138773	126617	100463	29899.6	61173.7	24669.5	0.0637331	0.05787	0.329216	0.523777	0.618769	0.109578
639.7810++	2	639.781	0	MLOC_1248.1	SYATLGVGGMAR	S[+80]YATLGVGGM[+16]AR	119.88	AT5G56550.1	OXS3, ATOXS3 | oxidative stress 3 | chr5:22895847-22896502 REVERSE LENGTH=172	68.43	0.9951	1.43549e-07	3.87291e-07	41661	124475	192008	147238	50609.7	118687	231575	72856.1	99783.5	167816	339141	208766	73696.2	194793	238557	55623.4	353730	152178	251321	124715	43895.8	65160.4	218072	42576.4	0.877278	0.457712	0.965622	0.211417	0.000532545	0.94449
737.8743++	2	737.874	0	MLOC_67213.1	SPAVAASPVVQAAAR	SPAVAAS[+80]PVVQAAAR	102.85	AT5G38710.1	| Methylenetetrahydrofolate reductase family protein | chr5:15501340-15503899 FORWARD LENGTH=476	45.67	0.995	2.71019e-05	4.28416e-05	79258.9	56207.7	109073	32649.7	4956.25	66288	14637.2	84703.4	25764.3	25974.7	12197.4	21361.6	14354.2	113604	166370	7648.56	15513	145349	140043	35503.8	30412.8	96614.4	108379	123902	0.447583	0.391577	0.660076	0.017087	0.216662	0.253124
777.3640++	2	777.364	0	MLOC_50863.2	GAASASASASAPTLPSK	GAASASASAS[+80]APTLPSK	114.83	AT5G61910.2	| DCD (Development and Cell Death) domain protein | chr5:24861091-24863729 REVERSE LENGTH=738	77.74	0.9949	1.68267e-08	5.79717e-08	182886	66024.1	228481	378734	26854	53234.9	54267.2	25823.6	133140	185299	90311.4	154574	21816.2	35888.6	92745.9	111339	88565.9	184902	129262	102598	200362	85828.9	69120.9	302215	0.840684	0.788164	0.4776	0.722675	0.87131	0.572988
832.8748++	2	832.875	0	MLOC_64351.2	MSGLLQSFTMTPQK	MSGLLQSFTM[+16]T[+80]PQK	119.47	AT1G64110.3	| P-loop containing nucleoside triphosphate hydrolases superfamily protein | chr1:23796887-23801255 REVERSE LENGTH=8	68.46	0.9949	1.42561e-07	3.84885e-07	137992	106895	57341.4	36106.7	11060.4	526788	218391	111562	93090.2	60084.5	78010.4	68737.9	188126	98292.8	406617	41984.9	77993.1	65190.2	67294.3	104514	60442.6	257116	346676	55279.7	0.352196	0.202554	0.302114	0.265909	0.0533282	0.794071
493.9126+++	3	493.913	2	MLOC_34577.1	YLSRRLVVASR	Y[+80]LSRRLVVAS[+80]R	118.31	-	-	43.14	0.9949	4.85289e-05	7.25752e-05	9486.68	10583.2	20629.1	13363.2	8391.89	2071.86	14691.6	2893.57	3538.74	31896.2	18041.2	66048.1	9901.45	7335.28	13592.5	6558.64	44423.6	7278.25	25043.9	60912.8	4014.93	15703.3	6292.99	28890	0.874378	0.886407	0.281137	0.849675	0.287716	0.586159
891.9045++	2	891.905	0	MLOC_36479.4	NIDGASSASNIVNSTPR	NIDGASSASNIVNST[+80]PR	119.16	AT3G05680.1	EMB2016 | embryo defective 2016 | chr3:1660802-1672015 REVERSE LENGTH=2138	150.7	0.9948	8.51138e-16	4.41376e-14	46928.1	81295	44205.5	39622.1	74781.6	65538	64702.2	52922.3	90331.1	32370.4	75025.6	106842	84003.9	26656.4	47638.2	38747.5	78606.1	44865.5	35791.2	37727.1	38935.9	20979.2	35405.8	62773	0.401042	0.333011	0.713621	0.246454	0.378426	0.4481
757.6505++++	4	757.651	0	MLOC_64351.2	LETKPATLLPPAAPAAAAPAPSPESKPEPK	LETKPATLLPPAAPAAAAPAPS[+80]PESKPEPK	110.75	AT1G64110.3	| P-loop containing nucleoside triphosphate hydrolases superfamily protein | chr1:23796887-23801255 REVERSE LENGTH=8	115.8	0.9948	2.63027e-12	3.07996e-11	2.30415e+06	3.20871e+06	31789.3	56817.4	4.05334e+06	225444	82082.9	276684	799113	110057	118460	72024.1	199597	327624	134271	159233	46906.9	146724	41946.2	86953.5	35162.4	51077.1	452855	44356.2	0.936905	0.275936	0.278437	0.449069	0.456663	0.436138
901.8887++	2	901.889	0	MLOC_65819.2	DLGSMMPLSPTTAVDR	DLGSM[+16]M[+16]PLS[+80]PTTAVDR	111.2	AT1G02080.2	| transcription regulators | chr1:373694-386682 FORWARD LENGTH=2377	92.42	0.9948	5.72796e-10	3.1118e-09	127275	253328	43668.1	202773	87808.8	77085.7	45739.6	114862	331646	56263.5	83342.4	600947	152144	128664	135911	120495	118253	94833.7	51744.2	110292	155966	35921.4	8881.22	34310.5	0.576322	0.20118	0.568257	0.235696	0.215437	0.321738
876.3855+++	3	876.385	0	MLOC_38604.1	FHEGGSGDQGGVMGMVGALAHEFLK	FHEGGS[+80]GDQGGVM[+16]GMVGALAHEFLK	100.01	AT1G79340.1	AtMC4, MC4 | metacaspase 4 | chr1:29842849-29844368 FORWARD LENGTH=418	96.16	0.9947	2.42103e-10	1.49185e-09	29635.7	25867.5	23939.3	5778.6	5290.83	74914.3	32106.8	6141.86	25283.5	19328	25329.8	3386.48	19718	47438.3	12347.2	7261.03	35579.2	19605.7	57742.9	20545.2	35422.6	20155.2	43375.3	14361.3	0.101725	0.677882	0.0457192	0.226725	0.519983	0.352975
984.4789+++	3	984.479	0	AK366021	AAAAAAAAATAAPSPSGATMVEDPFLVLAGGK	AAAAAAAAATAAPS[+80]PSGATM[+16]VEDPFLVLAGGK	94.66	AT3G16840.1	| P-loop containing nucleoside triphosphate hydrolases superfamily protein | chr3:5738020-5743042 REVERSE LENGTH=826	92.03	0.9947	6.26614e-10	3.36752e-09	18683.5	17492	17212.8	5410.29	23872.7	17902.9	15628.6	17605.9	14842.5	8271.67	18007.6	24367.6	37807.8	13134.6	32202.8	9695.49	17133.3	22335	12385.1	24528.9	12954.4	6898.46	22901.6	35297.5	0.860142	0.658259	0.867748	0.260173	0.889957	0.726401
759.6632+++	3	759.663	1	MLOC_1248.1	MNSDSIYDMSGMTAHLPAKK	MNS[+80]DSIYDMSGMTAHLPAKK	118.38	AT5G56550.1	OXS3, ATOXS3 | oxidative stress 3 | chr5:22895847-22896502 REVERSE LENGTH=172	64.86	0.9947	3.26588e-07	8.05974e-07	30022.2	17462.4	58585	61152.4	80379.9	118217	41123.1	47705.2	60479.9	76313.7	58024.1	62041.6	34636.1	42451.8	122270	22785.4	86123.4	90745.5	124658	69748.9	39910	66683.1	210502	16984.6	0.930199	0.4894	0.772245	0.431089	0.288687	0.283462
931.0863+++	3	931.086	0	AK364178	NSFSQQQQQQQQQQQHQQWLR	NS[+80]FSQQQQQQQQQQQHQQWLR	119.69	AT4G00660.1	RH8, ATRH8 | RNAhelicase-like 8 | chr4:274638-277438 FORWARD LENGTH=505	97.63	0.9946	1.72584e-10	1.12787e-09	81202.4	66883.6	70910.3	23984.8	56983.2	73539.2	34818.8	17602.1	67476.5	57565.6	40663.7	27113.8	32207.4	115667	86368.8	17827.5	55263.2	70104.4	312198	60226.5	20520.1	23782.6	57586.7	16198.1	0.744756	0.484995	0.111331	0.35248	0.299241	0.213824
771.8636++	2	771.864	0	AK376172	AASVSAPASSPYNLK	AAS[+80]VSAPASSPYNLK	119.6	AT3G01560.1	| Protein of unknown function (DUF1421) | chr3:219884-221707 FORWARD LENGTH=511	50.57	0.9946	8.77001e-06	1.5386e-05	89002.1	81955.7	60463.7	58835	112465	95386.7	77546.3	25443.5	169376	173256	201348	89621.9	153184	95115.5	143962	14448.5	657293	519111	340428	626135	63766.5	75206.3	70073.2	89903.6	0.845476	0.645855	0.865879	0.509765	0.741939	0.153097
656.7953++	2	656.795	1	MLOC_54389.1	GFTQRYSFAR	GFTQRYS[+80]FAR	119.73	AT3G63400.2	| Cyclophilin-like peptidyl-prolyl cis-trans isomerase family protein | chr3:23412449-23415435 FORWARD LENGTH=387	47.03	0.9946	1.98153e-05	3.23609e-05	41207.8	36640.9	65040.1	72071.2	30863.6	38877.7	78251.7	29627.4	50791.6	33622.5	47187.2	95690.4	47935.1	60767	59645.9	15944.7	114577	69711.1	136384	61612.9	84586.3	32022.6	28970.3	44746.9	0.479679	0.720743	0.790941	0.599461	0.960131	0.266795
587.6207+++	3	587.621	0	MLOC_57581.1	GLIPSPVTPMQIMHK	GLIPS[+80]PVTPM[+16]QIM[+16]HK	118.08	AT3G60240.4	EIF4G, CUM2 | eukaryotic translation initiation factor 4G | chr3:22261842-22268295 FORWARD LENGTH=1727	41.28	0.9946	7.44732e-05	0.000106968	71756.7	90711.7	26289.9	35708.8	65391.4	67896.2	37684.7	78392.4	45464.4	41951.4	142547	97724.1	126522	87392.1	86138.4	27650.1	64424.9	144660	99462.3	173665	26150.1	30041.5	78167.6	12005.6	0.407725	0.494107	0.411792	0.767425	0.885368	0.415983
633.2596++	2	633.26	0	MLOC_13342.2	EMTGSGIFAEK	EM[+16]TGS[+80]GIFAEK	119.63	AT4G39860.1	| unknown protein; BEST Arabidopsis thaliana protein match is: unknown protein (TAIR:AT2G22270.1); Has 152 Blast hit	66.26	0.9945	2.36592e-07	6.03264e-07	73938	83477.8	53719	31327.2	57244.4	51994.1	40729.7	8992.99	119365	98319.2	76275.6	151141	85218.3	96490.8	43023.2	7533.51	127504	105300	109509	101860	33026.9	27641.1	34414.2	17819.4	0.593615	0.327909	0.782342	0.993805	0.338013	0.0927002
783.3712+++	3	783.371	0	AK374324	ERPQAAISGESGDGALTEARPR	ERPQAAISGES[+80]GDGALTEARPR	119.81	-	-	61.48	0.9945	7.11214e-07	1.60445e-06	70965.8	106867	73087.6	41478.1	120378	155378	48028.3	124607	95761.7	109063	54602.5	180271	120913	101495	115325	44474.2	64328.7	52737.1	154735	120939	30727	61189.1	135718	47890.4	0.588447	0.648194	0.462952	0.730141	0.836136	0.676026
832.4138++	2	832.414	0	AK355067	QRPVSQSAPLFPEK	QRPVSQS[+80]APLFPEK	119.58	AT2G33490.1	| hydroxyproline-rich glycoprotein family protein | chr2:14183552-14187666 FORWARD LENGTH=623	57	0.9945	1.99526e-06	4.06069e-06	131355	211072	438466	63514.6	224900	191753	225174	339726	160785	160233	195291	146837	245443	220864	149724	884431	154515	328524	1.38125e+06	181701	1.43626e+06	95947.4	127538	632140	0.237484	0.285312	0.664894	0.366228	0.363924	0.972453
972.9605++	2	972.96	0	MLOC_52280.1	VAAAEPANECPLPISPTK	VAAAEPANEC[+57]PLPIS[+80]PTK	114.27	AT4G31430.3	| unknown protein; LOCATED IN: plasma membrane; EXPRESSED IN: 25 plant structures; EXPRESSED DURING: 15 growth stage	84.87	0.9944	3.25837e-09	1.39749e-08	106082	90852.3	45689	140551	161192	130818	141882	151675	47958.4	52288.4	54218.5	63165.7	62066.4	137095	138686	23977.9	53080.4	49882.1	27260.8	46330.5	22016.6	10106.6	43744.2	36087.8	0.850125	0.318044	0.705806	0.863826	0.64981	0.859554
576.0286++++	4	576.029	1	MLOC_5598.2	AHPGGPALSEFVWATGNTPRR	AHPGGPALSEFVWATGNT[+80]PRR	119.78	AT1G15340.1	MBD10 | methyl-CPG-binding domain 10 | chr1:5275895-5277474 REVERSE LENGTH=384	75.66	0.9944	2.71644e-08	8.88349e-08	255869	289686	250686	123688	200755	236906	246094	187290	698806	140635	359108	304897	422683	259090	296369	136929	183014	3.05523e+06	1.5266e+06	1.80741e+06	357758	112579	291744	177406	0.501079	0.527508	0.578791	0.218838	0.544984	0.141949
807.4365+++	3	807.436	1	AK369564	LKLEPPAPAATAAAVPISPATTPR	LKLEPPAPAATAAAVPIS[+80]PATTPR	117.67	AT4G39680.2	| SAP domain-containing protein | chr4:18414604-18416938 REVERSE LENGTH=633	69.59	0.9944	1.09901e-07	3.05381e-07	362319	285074	264323	212458	90673.2	337853	86832.7	564021	98669.1	101898	324869	189654	277852	260912	351843	337400	71067.1	44604.9	158178	15524.1	48664.2	40736.1	397043	550832	0.794653	0.542729	0.755357	0.560491	0.328001	0.0427634
558.0038++++	4	558.004	1	AK376429	DGHTNEPDKKPLGTNADSPR	DGHTNEPDKKPLGTNADS[+80]PR	100.28	AT1G21630.1	| Calcium-binding EF hand family protein | chr1:7581457-7587796 FORWARD LENGTH=1218	35.91	0.9944	0.000256448	0.00032477	135247	51197.7	300089	275005	13786.1	214461	249422	83960.4	54262.9	50711.9	30465.1	52164	10330.5	230271	49100.6	11122.3	113726	189153	177943	51344.8	38596.7	82865.3	47118	52050	0.942763	0.490113	0.778887	0.0826952	0.298217	0.343826
845.0186+++	3	845.019	0	MLOC_79392.2	TPYHPMMDEDGSLSPTRPFDK	TPYHPM[+16]M[+16]DEDGSLS[+80]PTRPFDK	119.76	AT5G52200.2	| phosphoprotein phosphatase inhibitors | chr5:21202818-21204017 REVERSE LENGTH=211	97.74	0.9943	1.68267e-10	1.10691e-09	240767	815580	422277	1.22479e+06	371947	260437	230772	421690	326220	265178	571817	760150	376181	367749	325655	218083	73052.8	141682	519863	188261	107816	169065	638233	792552	0.470774	0.0432549	0.239802	0.864975	0.510852	0.386721
867.4109++	2	867.411	0	AK361510	TQSFVPSDLSAIFGGK	TQS[+80]FVPSDLSAIFGGK	109.87	AT4G30890.3	UBP24 | ubiquitin-specific protease 24 | chr4:15036383-15038825 REVERSE LENGTH=551	96.68	0.9943	2.14783e-10	1.34847e-09	680535	686806	294317	114936	664684	918695	238022	409610	254203	91147	436227	91851.4	93071.5	242748	569196	180528	83827.6	29755.2	103815	47352.1	92822.2	81526.5	240500	87659.5	0.814521	0.780914	0.28972	0.70974	0.7847	0.812414
649.2840++	2	649.284	0	MLOC_1497.2	ALIAEGSCGSPR	ALIAEGSC[+57]GS[+80]PR	105.28	AT4G24620.1	PGI1, PGI | phosphoglucose isomerase 1 | chr4:12708972-12712610 REVERSE LENGTH=613	62.83	0.9943	5.21195e-07	1.2142e-06	186213	47439.2	44777.9	68566.8	290210	56094.6	32923.9	28681.7	108396	78703.5	42089.3	149434	288672	61679	30847.1	27938	268251	128270	120469	1.4037e+06	107614	29674.9	32981.1	11458.8	0.185606	0.110591	0.502061	0.0996483	0.0833596	0.0772295
594.2765++	2	594.276	0	AK373688	GISYSQPLSR	GISYS[+80]QPLSR	119.89	AT1G65580.1	FRA3 | Endonuclease/exonuclease/phosphatase family protein | chr1:24377598-24383940 REVERSE LENGTH=1101	47.99	0.9943	1.58855e-05	2.65178e-05	86021.4	269848	76421	171038	352413	160304	88571.9	66636.3	169493	221152	222453	259508	111853	194811	199597	17760.3	165770	482454	290702	286703	60015.9	63505	42861.2	40644.4	0.16192	0.500607	0.112186	0.754353	0.590199	0.281822
1007.4493++	2	1007.45	0	AK252411.1	TAQDSNGVLNSWASNLEK	TAQDSNGVLNSWAS[+80]NLEK	119.05	AT5G09900.2	EMB2107, RPN5A, MSA | 26S proteasome regulatory subunit, putative (RPN5) | chr5:3089462-3092434 REVERSE LENGTH=442	46.97	0.9943	2.00909e-05	3.27843e-05	25479.4	216982	9029.19	18973.3	24797.5	39796	73509.9	25923.7	436233	339177	15509.5	52873.2	47615.2	142109	80144.4	36225	363134	13079	10840.2	18253.6	286511	22777	22901.6	17178.7	0.627732	0.173049	0.193644	0.63116	0.551348	0.382181
908.9037++	2	908.904	0	MLOC_37098.1	VGPDIPSSADPTTQPSPA	VGPDIPSSADPTTQPS[+80]PA	111.83	AT4G36180.1	| Leucine-rich receptor-like protein kinase family protein | chr4:17120209-17123698 REVERSE LENGTH=1136	45.52	0.9943	2.80543e-05	4.42072e-05	62231.6	46147.5	38736	37370	143261	123423	24696.8	18316	127085	88190.6	59159.9	189734	73006.3	45165.7	23721.1	22818.2	124532	79628	61094.7	44433.3	15564.4	46633.8	25458.5	77734.3	0.271719	0.147478	0.818359	0.910004	0.290016	0.460666
701.6428+++	3	701.643	2	AK358387	SGRDFENANTDSEKLSPR	SGRDFENANTDSEKLS[+80]PR	109.25	AT5G28350.1	| Quinoprotein amine dehydrogenase, beta chain-like; RIC1-like guanyl-nucleotide exchange factor | chr5:10320301-103	42.58	0.9943	5.52077e-05	8.16461e-05	22202	7492.06	19178.9	25264.1	28807.2	10079.2	8979.39	39822.7	53694.5	36825.5	7814.76	37757	54410.2	11329.5	19505	20691.9	116121	97139.5	68151.9	50569.5	32746	18957.7	5763.18	12146.4	0.688819	0.402873	0.456482	0.0960467	0.0561114	0.295355
1164.5203++	2	1164.52	0	MLOC_63525.2	AQASPSGGWPAYPTSPAAYGSPK	AQASPSGGWPAYPTSPAAYGS[+80]PK	118.82	AT2G19810.1	| CCCH-type zinc finger family protein | chr2:8550419-8551498 FORWARD LENGTH=359	91.15	0.9942	7.67361e-10	3.96901e-09	95956.1	89079.6	52588.3	40584	30020.4	124315	49907.3	23079.5	66645.2	23722.9	56179.9	22758.1	42433.3	73749.3	77971.7	30705.2	18760.8	15075.4	24343.7	26841.1	29022.4	37130.7	72133	13714.3	0.620808	0.581041	0.319409	0.224274	0.0755007	0.181658
1152.4908++	2	1152.49	0	MLOC_6899.3	STFFDDSVPSSPAYTSGFSPK	STFFDDSVPSSPAYTSGFS[+80]PK	119.89	AT1G20760.1	| Calcium-binding EF hand family protein | chr1:7209515-7214773 FORWARD LENGTH=1019	79.09	0.9942	1.2331e-08	4.4041e-08	108107	54247.7	51065.9	70675	14561.4	103697	42388.5	149361	59219.4	23410.2	13855.4	76666.3	20321.4	73896.4	29101.6	70321.2	14118.7	10077.4	15550.1	23327.2	38987.9	11269.2	11099.2	13590	0.408734	0.375017	0.917594	0.30726	0.819645	0.315858
786.8871++	2	786.887	0	AK375506	GSAVSASAKPLFTEK	GSAVSAS[+80]AKPLFTEK	119.88	AT1G65090.3	| unknown protein; FUNCTIONS IN: molecular_function unknown; INVOLVED IN: biological_process unknown; LOCATED IN: ce	62.33	0.9942	5.8479e-07	1.35131e-06	11742.3	67538.5	46501.9	62732.3	24560.9	80934.6	60618.4	7454.36	30738.7	66136.7	74086.7	33593.9	17352.9	80017.2	79873.5	32363.3	52710.2	64976.1	50890.1	54927.1	11666	26076.5	40309.6	27304.3	0.100716	0.180061	0.293123	0.138215	0.0717565	0.647277
766.8714++	2	766.871	0	AK363519	VNTEIVESPSIHK	VNTEIVES[+80]PSIHK	119.67	AT5G16210.1	| HEAT repeat-containing protein | chr5:5290999-5297779 REVERSE LENGTH=1180	60.88	0.9942	8.16582e-07	1.8165e-06	88468.5	944104	1.83271e+06	1.0403e+06	1.62529e+06	34379	89446	42542.7	225733	54362.6	72403.7	42987.8	97547	136242	54847.6	87688.5	28295.1	41156.6	105118	36071.6	15310.4	56871	108353	105395	0.525067	0.441823	0.5244	0.438261	0.444218	0.439914
799.3553+++	3	799.355	0	AK366151	SIGLSSGGAEQPHGGEGGSVGGSFGK	SIGLSSGGAEQPHGGEGGSVGGS[+80]FGK	119.9	AT1G20110.1	| RING/FYVE/PHD zinc finger superfamily protein | chr1:6971554-6974578 FORWARD LENGTH=601	51.21	0.9942	7.56833e-06	1.34492e-05	60170.9	76811.8	53156.2	36625.7	68712.8	90155.8	41033.2	196144	102390	84569.2	75752.3	42297.3	88176.1	208502	368107	12502.5	130617	150307	95262.3	89897.3	30160.9	49650.6	38251.8	19306.1	0.855069	0.4053	0.216229	0.399506	0.515552	0.847508
1011.9333++	2	1011.93	0	AK375304	WGSPSGAPDWGVNGEELGK	WGS[+80]PSGAPDWGVNGEELGK	106.47	AT2G41900.1	| CCCH-type zinc finger protein with ARM repeat domain | chr2:17491352-17493502 FORWARD LENGTH=716	43.83	0.9942	4.14e-05	6.29034e-05	35038.7	12978.2	20686.1	12623.2	3231.62	31610.4	19596.6	24107.6	12546.2	10651.2	11911.3	25357.1	4260.16	19777.1	125886	58769.8	35605.7	75095.4	48709.7	45454.9	61250.1	21569.8	23872.9	47116.6	0.838887	0.965691	0.995091	0.949167	0.460047	0.416311
1230.5205++	2	1230.52	0	AK369153	SEESDDEDAIAESPPPAPTPTPK	SEESDDEDAIAES[+80]PPPAPTPTPK	106.73	AT1G61730.1	| DNA-binding storekeeper protein-related transcriptional regulator | chr1:22793447-22794577 REVERSE LENGTH=376	39	0.9942	0.000125893	0.000171099	34919.9	33209.5	15610.1	7740.36	26745.2	37187.1	5744.65	6308.46	23903.9	24440.7	20328.9	18300.8	18514.2	18345.5	18191.6	4318.57	47664.2	15666.4	23434.3	11834.6	12983.5	4239.58	8722.28	18589.4	0.285633	0.162033	0.0932786	0.965188	0.217719	0.204747
973.9339++	2	973.934	0	AK354749	MFGEVADVKPLLSGSWD	M[+16]FGEVADVKPLLS[+80]GSWD	118.53	AT1G16770.1	| unknown protein; Has 109 Blast hits to 109 proteins in 52 species: Archae - 0; Bacteria - 4; Metazoa - 0; Fungi -	110.54	0.9941	8.8308e-12	8.88196e-11	622567	660574	613340	272210	365473	602881	350095	329280	193514	94760.9	465464	140582	199909	411103	638659	242625	215466	33831.8	195032	194051	28065	114578	662378	421067	0.761837	0.692913	0.430922	0.376516	0.0861267	0.313399
722.8452++	2	722.845	0	MLOC_80634.2	IEQSLGAGSLSFR	IEQSLGAGSLS[+80]FR	117.87	AT1G69040.2	ACR4 | ACT domain repeat 4 | chr1:25957843-25960079 FORWARD LENGTH=455	73.1	0.9941	4.89779e-08	1.48383e-07	27092	13348.2	20676.5	53535.6	16084.7	34988.6	27742.9	27582.6	139242	97602.8	51108	35908	37818.4	33136.1	30068.7	16527	424451	378872	322261	73511.3	29278.4	17926.3	13738.5	19322.6	0.848615	0.695723	0.352796	0.91571	0.665746	0.424528
830.1178++++	4	830.118	1	AK360867	KPQVEESYGSGYGSRPQGGEEYGSAGYGGRK	KPQVEESYGSGYGSRPQGGEEYGS[+80]AGYGGRK	119.96	AT5G39570.1	| FUNCTIONS IN: molecular_function unknown; INVOLVED IN: biological_process unknown; LOCATED IN: cytosol, nucleus; E	46.42	0.9941	2.28034e-05	3.66858e-05	14431.4	26590.3	35340	12085.5	18921.9	20746.4	7147.87	13511.3	17794.8	14579.3	18460.7	21893.9	30874.8	34342.3	29461.9	1209.55	208451	26195.2	35462.3	549424	16619.6	11511.6	22417.6	6220.98	0.463409	0.515099	0.606499	0.994341	0.776459	0.0758133
707.3661++	2	707.366	1	MLOC_55738.1	NNIVFIVSGRSK	NNIVFIVSGRS[+80]K	119.87	AT1G06410.1	ATTPS7, TPS7, ATTPSA | trehalose-phosphatase/synthase 7 | chr1:1955413-1958153 FORWARD LENGTH=851	38.01	0.9941	0.000158125	0.000210184	40205.7	13427.6	47245.3	39209.8	53180.4	57687.3	164045	42070.1	60839.4	18836.2	20386.6	59840.3	97507.6	45434.9	93447	5045.46	106586	166599	90248.1	110557	22187.2	49064.8	37196.1	45470	0.961669	0.598567	0.983242	0.78506	0.411913	0.369441
1051.4712+++	3	1051.47	0	AK355834	AVGLPTDDDMGNSEVGHNALGAGQIYAQGAK	AVGLPTDDDM[+16]GNS[+80]EVGHNALGAGQIYAQGAK	117.62	AT1G09780.1	| Phosphoglycerate mutase, 2,3-bisphosphoglycerate-independent | chr1:3165550-3167812 REVERSE LENGTH=557	56.91	0.994	2.03704e-06	4.13729e-06	76048.2	92624.9	52024.9	91351.8	41195.1	69416.3	38436.5	73193.1	44958.9	34528.2	46415.3	69977.8	25580.6	67984.4	50655.5	40882.9	27679.7	40051.3	65250.1	52213.6	18336.7	17802.2	50918.9	118088	0.808255	0.773577	0.318549	0.329141	0.103483	0.170973
706.8371++	2	706.837	0	MLOC_14013.1	GILAADESTGTIGK	GILAADESTGT[+80]IGK	107.21	AT2G36460.1	| Aldolase superfamily protein | chr2:15296929-15298387 REVERSE LENGTH=358	76.49	0.9939	2.24388e-08	7.46652e-08	32165.8	92071.3	179968	105996	271979	413612	27841.7	31594.9	82170.7	385988	72345.1	93606.5	532611	377913	110873	33293.7	117873	216626	101279	160102	30256.7	46738.6	45001.3	33120.6	0.224442	0.392856	0.278158	0.995503	0.278398	0.232483
541.7657++	2	541.766	0	MLOC_10405.1	LSSIDAQLR	LSS[+80]IDAQLR	119.73	AT1G53310.3	ATPPC1, PEPC1, ATPEPC1, PPC1 | phosphoenolpyruvate carboxylase 1 | chr1:19884261-19888070 REVERSE LENGTH=967	66.09	0.9939	2.46037e-07	6.26147e-07	763895	903112	1.37937e+06	572853	916043	698979	891188	313203	843757	1.2253e+06	1.26968e+06	598662	1.27921e+06	948594	977816	149605	375325	1.76714e+06	1.60119e+06	486803	636501	402814	1.28153e+06	114289	0.115891	0.0226923	0.542134	0.363921	0.662855	0.0617124
918.4542++	2	918.454	1	AK362998	RAGSGSTRPDSVLPVEK	RAGS[+80]GSTRPDSVLPVEK	114.81	AT3G01540.1	DRH1, ATDRH1 | DEAD box RNA helicase 1 | chr3:213077-216142 REVERSE LENGTH=618	62.99	0.9939	5.02343e-07	1.1813e-06	36943.8	32590.9	334362	346396	36089.2	60763.9	92824.5	102604	36715.3	60450	123964	349512	65906.6	70931	49468.9	187279	61684.3	396446	625360	58397.7	155798	14793.4	61358.1	208128	0.419915	0.162082	0.166943	0.450681	0.683386	0.196123
566.2815++	2	566.282	0	MLOC_58756.5	NLSTPPPVAR	NLS[+80]TPPPVAR	118.93	AT4G30160.1	VLN4, ATVLN4 | villin 4 | chr4:14754528-14759511 FORWARD LENGTH=974	54.31	0.9939	3.70681e-06	7.04487e-06	175229	299552	188614	340200	454832	117487	101930	92536.5	466152	670558	434020	378630	252336	111590	130278	48802.7	165980	456680	244724	2.34897e+06	109132	186730	191452	107766	0.251831	0.881537	0.377912	0.324865	0.334171	0.204482
578.7603++	2	578.76	0	AK368262	SLSLDSPTEK	SLSLDS[+80]PTEK	119.93	AT5G06970.1	| Protein of unknown function (DUF810) | chr5:2158431-2166004 REVERSE LENGTH=1101	43.91	0.9939	4.06443e-05	6.18258e-05	16111.5	16833.2	5132.44	13465.6	44832	22853	14146	38526	99073.5	39698.2	11754.8	67616.9	34557.3	36491.7	16031.2	15305.9	25828.6	28421.9	26990.6	78420.8	11401.7	11905	9261.9	34592.2	0.560483	0.352874	0.86379	0.629855	0.231891	0.952565
759.1535++++	4	759.153	2	MLOC_60571.1	NPPPGAPHLIVTTPEIEGLRPKSPPPKN	NPPPGAPHLIVTTPEIEGLRPKS[+80]PPPKN	118.92	AT4G09980.1	EMB1691 | Methyltransferase MT-A70 family protein | chr4:6247978-6252030 REVERSE LENGTH=963	38.36	0.9939	0.000145881	0.000195603	95674.8	210886	210716	328058	342307	330317	2.49492e+06	300792	166916	228060	597452	371097	253558	349419	234187	85136.9	36096.1	36749.6	231416	124747	91573.4	134872	2.17314e+06	175116	0.471786	0.20044	0.175179	0.701408	0.186379	0.691715
989.9123++	2	989.912	0	MLOC_65690.1	SLAGDLTDPEMAQPYMK	S[+80]LAGDLTDPEM[+16]AQPYM[+16]K	100.34	AT4G34450.1	| coatomer gamma-2 subunit, putative / gamma-2 coat protein, putative / gamma-2 COP, putative | chr4:16471956-164767	32.87	0.9939	0.000516416	0.000610978	169584	48740.5	53665.9	29957.3	26775.2	130890	27457.8	26529.9	13761.8	170272	29411.9	23046.2	57994.2	27416	40901.4	25464.5	36456.7	27605.2	20472.6	36664.5	59589.2	17054	19886.9	13535.5	0.900647	0.516468	0.467536	0.810586	0.226361	0.148987
648.6540+++	3	648.654	0	MLOC_59292.1	SATENIFGSAQGLTQVLK	S[+80]ATENIFGSAQGLTQVLK	116.45	AT2G36640.1	ATECP63, ECP63 | embryonic cell protein 63 | chr2:15357019-15358552 REVERSE LENGTH=448	180.03	0.9938	9.93116e-19	1.6523e-16	210830	390628	464520	132517	311781	406167	510003	112073	96316.7	93887.5	332149	66284.5	101231	381777	538901	63057.7	278150	115698	146752	89404.8	110133	103672	403570	140917	0.966559	0.343389	0.221817	0.377615	0.0306024	0.44101
837.8666++	2	837.867	0	MLOC_37629.1	IFSQEENETSVSPK	IFSQEENETSVS[+80]PK	119.85	AT2G23740.1	| nucleic acid binding;sequence-specific DNA binding transcription factors;zinc ion binding | chr2:10098213-10103229	62.73	0.9938	5.33335e-07	1.23958e-06	13838.8	32388.2	11541.8	20450.7	9863.53	74038.4	18390.1	13665.3	25820.4	21176.1	13322.5	31618.1	30764.1	20432.4	17085.4	14695.7	55470	52790.6	21367.8	74824.8	10363.1	21817.1	7022.96	55919.1	0.824256	0.329054	0.644084	0.369326	0.739642	0.54896
682.6734+++	3	682.673	0	MLOC_63900.2	LIHPLPPPVNSPESSPER	LIHPLPPPVNS[+80]PESSPER	108.66	AT4G03080.1	BSL1 | BRI1 suppressor 1 (BSU1)-like 1 | chr4:1359935-1365166 REVERSE LENGTH=881	62.28	0.9938	5.91562e-07	1.36223e-06	39143.8	58140.9	94543.7	38215.8	70502.7	74476.7	274750	39361.5	30341	78932.5	72562.1	62292.1	98593.1	51414.8	383653	18937.8	82428.5	357167	28959.6	51456.6	24651.6	7016.16	22193.2	16878.1	0.363343	0.598987	0.999312	0.538115	0.275598	0.223962
665.7950++	2	665.795	0	AK249986.1	EAFGLPNSPYR	EAFGLPNS[+80]PYR	115.83	AT2G26280.1	CID7 | CTC-interacting domain 7 | chr2:11188143-11190579 REVERSE LENGTH=567	57.99	0.9938	1.58855e-06	3.31231e-06	166494	168313	214436	127063	155806	113908	104674	64853.8	229641	231942	206278	165690	250015	164771	133788	49093	482582	231876	424634	489610	77276.6	69283.9	147880	70980.6	0.493239	0.932073	0.844322	0.487406	0.595287	0.187131
514.5630+++	3	514.563	1	MLOC_38604.1	ETVRDVFESHSR	ETVRDVFESHS[+80]R	119.82	AT1G79340.1	AtMC4, MC4 | metacaspase 4 | chr1:29842849-29844368 FORWARD LENGTH=418	44.62	0.9938	3.45144e-05	5.31082e-05	8714.58	13229.7	52381.7	8800.4	6158.58	32464.6	60926.9	5911.29	15336.8	14554.3	23750.5	22501.4	28273.2	21312	48676.5	5918.56	49003.2	73562	89394	318903	32111.1	14089.3	43394.9	32655.1	0.714857	0.268101	0.460411	0.966576	0.0577375	0.584432
856.7412+++	3	856.741	0	MLOC_6494.1	VSGHGLEGAGSFTEQTISQALATAR	VSGHGLEGAGS[+80]FTEQTISQALATAR	118.84	AT4G08520.1	| SNARE-like superfamily protein | chr4:5417887-5420295 FORWARD LENGTH=181	147.24	0.9937	1.88799e-15	8.66523e-14	157329	193203	244239	110124	158265	194147	271452	37118.5	106360	55940.6	210601	52882.6	129715	190495	180964	130947	73346.1	24147.6	86985.6	36559.6	13018.9	45612.6	147440	24862.4	0.74651	0.33141	0.259999	0.560886	0.183494	0.563516
727.9827+++	3	727.983	1	MLOC_62611.2	RGSIFDSASEDEDFLAQSK	RGSIFDSAS[+80]EDEDFLAQSK	119.42	AT3G12340.1	| FKBP-like peptidyl-prolyl cis-trans isomerase family protein | chr3:3925720-3929346 REVERSE LENGTH=499	98.26	0.9937	1.49279e-10	1.00518e-09	26623.4	36045.3	184322	123458	4477.49	71319.9	112422	27668.8	332287	304461	129354	166105	803168	66149	111658	31278.4	1.02744e+06	651904	222385	372021	85984.9	74675.9	126993	1.11988e+06	0.729308	0.441085	0.512425	0.465141	0.550007	0.843936
797.8898++	2	797.89	0	MLOC_56360.3	SISITPEIGDDIVR	SIS[+80]ITPEIGDDIVR	119.87	AT3G58640.2	| Mitogen activated protein kinase kinase kinase-related | chr3:21687153-21692675 REVERSE LENGTH=809	94.75	0.9937	3.34965e-10	1.97274e-09	362131	213534	208483	191529	195239	216972	298306	80890.1	126330	127815	362372	179602	158213	127322	229418	103933	90445.8	65676.5	181866	87701.4	28008.8	47068.1	131757	66727.1	0.609077	0.610121	0.703941	0.965634	0.277615	0.491556
819.3531++	2	819.353	0	MLOC_19453.1	APDENISLGCQTPR	APDENISLGC[+57]QT[+80]PR	119.71	-	-	45.89	0.9937	2.57632e-05	4.09199e-05	92955.8	420165	128672	105856	102585	501236	116192	69134	61915.6	63943.6	302248	80641.4	48982.7	291293	28706.3	46912.4	201693	573295	146176	88312.6	73517.6	28170	28482.3	61644	0.274543	0.368236	0.591286	0.286154	0.638131	0.446544
677.8420++	2	677.842	0	AK359017	VLITEFNSPVR	VLITEFNS[+80]PVR	115.31	AT2G01320.1	| ABC-2 type transporter family protein | chr2:154669-158063 REVERSE LENGTH=725	37.45	0.9937	0.000179887	0.000235273	47213.6	19123.1	42002.8	24707	10385.8	76152	53288.3	19151.5	34893.1	39789.2	14670.4	10743.4	35588.2	22743.5	43641	6809.94	46051.1	40695.9	57068.6	38374.7	20703.2	8440.46	14499.2	17478.1	0.323078	0.747402	0.178563	0.598562	0.357793	0.418217
595.2863++	2	595.286	0	MLOC_66641.1	LPNFSGIFSK	LPNFS[+80]GIFSK	119.89	AT1G76390.2	| ARM repeat superfamily protein | chr1:28655914-28658531 FORWARD LENGTH=811	32.53	0.9937	0.00055847	0.00065626	51416.2	37970.9	2641.86	168999	18209.2	31976.9	4436.28	18396.5	40474.2	20484.7	16966.9	9517.53	20124.3	34973.5	9016.14	224358	34862.8	26939.8	9135.48	17227.4	26526.9	88867.3	30476	36139.8	0.14545	0.0144507	0.702319	0.245605	0.494042	0.392394
885.9024++	2	885.902	1	MLOC_33958.1	TPRVSPAVSPAEFPR	T[+80]PRVSPAVS[+80]PAEFPR	106.24	-	-	43.56	0.9936	4.40555e-05	6.66087e-05	41433.6	48611.4	16305	18407.7	90583.4	37449.4	49034.2	40336.4	37250	39094.9	43169.4	38777.8	37578.8	26402.8	42049.4	22943.6	54171.8	26849	35109.8	87872.5	21997.8	11458.9	13903.3	15476.3	0.505983	0.269725	0.865781	0.375813	0.58541	0.392853
552.7999++	2	552.8	0	AK368457	SLSLVPRPR	SLS[+80]LVPRPR	111.27	AT4G17940.1	| Tetratricopeptide repeat (TPR)-like superfamily protein | chr4:9965787-9966778 FORWARD LENGTH=274	42.52	0.9936	5.59758e-05	8.27513e-05	73515.6	39482.5	48892	498599	33007.2	41813.1	69695.1	306564	76895.1	108960	62634.3	943553	224795	69699.8	59251.2	148712	160001	75507.2	97476.9	375351	105319	14478.4	27309.5	41401.7	0.466844	0.398725	0.102819	0.307014	0.352297	0.671825
888.8754++	2	888.875	0	MLOC_61704.1	DFAGAGSSSLSSPTADAR	DFAGAGSSSLSS[+80]PTADAR	119.86	AT4G15415.1	ATB' GAMMA | Protein phosphatase 2A regulatory B subunit family protein | chr4:8817707-8819349 FORWARD LENGTH=522	149.92	0.9935	1.01859e-15	5.08404e-14	81406.7	124067	236317	90697.3	143329	55738.9	145931	134389	123485	213293	206116	126151	171255	143473	206188	118595	225748	55443.2	215227	237958	43575.3	55352.1	200987	54021.3	0.853333	0.226052	0.904375	0.528544	0.27209	0.734925
810.7000+++	3	810.7	0	AK372699	VAANSAASAAPGLSPSSSMGSLSSDK	VAANSAASAAPGLS[+80]PSSSMGSLSSDK	119.63	AT3G14010.4	CID4 | CTC-interacting domain 4 | chr3:4637164-4640324 FORWARD LENGTH=549	83.21	0.9935	4.77529e-09	1.95969e-08	22355	29815.3	38775.5	70534.4	122913	86963.5	44370.3	61018.3	27166.3	43432.5	33721.6	95862.6	82709.2	70688.9	220043	98343.9	75175.6	55445.5	45048.9	80751.2	25644.4	49988.1	75988.2	64696.2	0.948918	0.902348	0.156743	0.818542	0.592852	0.944591
610.7872++	2	610.787	0	MLOC_57182.2	SLSPLHGSSQK	SLS[+80]PLHGSSQK	101.08	AT1G80680.1	SAR3, MOS3, PRE, NUP96 | SUPPRESSOR OF AUXIN RESISTANCE 3 | chr1:30324219-30328489 FORWARD LENGTH=1046	53.23	0.9935	4.75335e-06	8.82387e-06	41770.5	62351.6	12260.4	58153.4	625.651	76314	10082.1	8659.17	20535.9	93630.7	21491.6	47880.4	32821.4	22963.7	20854	10842.7	109974	235834	374676	14450.1	131923	12228	56790.6	52478.7	0.345743	0.585793	0.623415	0.723925	0.600193	0.535812
484.2466++	2	484.247	0	AK370828	SVSLPSAVK	SVS[+80]LPSAVK	119.76	AT3G53670.2	| unknown protein; FUNCTIONS IN: molecular_function unknown; INVOLVED IN: biological_process unknown; LOCATED IN: ce	45.72	0.9935	2.67917e-05	4.23848e-05	47506.1	60630.6	102360	54758.2	114777	71692.6	155460	24042.3	68559.4	105417	70210	107179	89469.4	67444.9	66619.9	15538.5	196739	206316	105344	262753	122611	31942.5	48909.5	70653.3	0.774985	0.83103	0.665013	0.0483026	0.642934	0.035738
871.8870++	2	871.887	0	AK362494	SMAEAAAAESLQASTPK	SMAEAAAAESLQAST[+80]PK	119.8	AT1G12970.1	PIRL3 | plant intracellular ras group-related LRR 3 | chr1:4423727-4425632 FORWARD LENGTH=464	114.44	0.9934	3.59749e-12	4.08091e-11	42628.1	53931.2	85812	42119.8	70170.9	147520	154088	185100	99221.8	51393	126003	583415	254487	146545	232883	297500	129874	59017.1	76778.7	155070	117201	82191.9	226223	313500	0.297654	0.861899	0.416255	0.747953	0.44657	0.183116
678.7826++	2	678.783	0	MLOC_34542.2	DGSLSFHVSDGR	DGSLS[+80]FHVSDGR	119.85	AT3G48330.2	PIMT1 | protein-l-isoaspartate methyltransferase 1 | chr3:17892969-17893975 REVERSE LENGTH=230	55.07	0.9934	3.11172e-06	6.01408e-06	27216.8	42050.6	33423.5	75687.3	18660.7	33210	34218.8	20825.7	71981.4	45594.8	39129.5	86299.6	45589.7	40401.4	32067.9	37326.9	424071	556281	242735	49148.9	140562	8267.93	33616.9	72477.5	0.861621	0.661294	0.495698	0.39599	0.444125	0.599357
633.8214++	2	633.821	1	AK355067	RGSFSGPIPLR	RGS[+80]FSGPIPLR	110.51	AT2G33490.1	| hydroxyproline-rich glycoprotein family protein | chr2:14183552-14187666 FORWARD LENGTH=623	49.64	0.9934	1.08643e-05	1.86826e-05	39538.8	73672.9	44985.6	52662.7	47051.7	55438.7	49678.7	29352.5	101729	123757	207264	72492.3	84655.8	110066	40451.6	76130.9	86815.8	575552	139828	70385.1	89573.2	16856.2	28012	62218.7	0.375677	0.39343	0.638313	0.709275	0.146221	0.423135
900.9009++	2	900.901	0	MLOC_55748.1	SVSMGNLAQLAEGSGGAR	SVS[+80]M[+16]GNLAQLAEGSGGAR	119.9	AT5G47390.1	| myb-like transcription factor family protein | chr5:19227001-19228546 FORWARD LENGTH=365	108.81	0.9933	1.31522e-11	1.26547e-10	31643.4	113262	37285.3	137891	54205.9	22221.8	111297	67043.6	45534	39338.5	62789.8	31420.8	36384.2	26820.2	66228.2	45534.6	66840.9	89572.8	70886.9	76781.2	33570.2	21165.7	18215.1	72799.7	0.307143	0.576957	0.405021	0.114994	0.478997	0.147643
764.9948+++	3	764.995	1	MLOC_1248.1	MNSDSIYDMSGMTAHLPAKK	M[+16]NS[+80]DSIYDMSGMTAHLPAKK	115.08	AT5G56550.1	OXS3, ATOXS3 | oxidative stress 3 | chr5:22895847-22896502 REVERSE LENGTH=172	80.84	0.9933	8.24138e-09	3.12812e-08	46656.2	32291.6	33413.9	45501.5	113414	124898	63014.5	51294.3	96885.1	62596.1	45071.2	94080.9	69912	103649	99423.3	32226.2	189380	223115	81110.3	157286	129256	61741.6	179907	42310	0.949614	0.321203	0.834771	0.791061	0.822193	0.0786797
515.2475++	2	515.247	1	AK376453	RYASPSLR	RYAS[+80]PSLR	95.56	AT2G20190.1	ATCLASP, CLASP | CLIP-associated protein | chr2:8711862-8718813 REVERSE LENGTH=1439	59.1	0.9933	1.23027e-06	2.63969e-06	21971.1	14593.1	11312.6	63605.2	1115.29	12624.9	12681.9	7641.86	18911.5	19646.5	5367.61	9188.74	9569.43	12176.8	2609.66	3799.36	21578.3	66551.3	16451.2	676171	21067.5	15821.6	8049.22	12094.4	0.521289	0.0997624	0.396588	0.665701	0.707154	0.704407
779.0394+++	3	779.039	0	AK374324	ERPEAAVSAESGDTALAATRPR	ERPEAAVSAES[+80]GDTALAATRPR	119.52	-	-	93.98	0.9932	3.99945e-10	2.29781e-09	43511.3	46667.6	46836.1	79042.7	13764.3	11929.6	64588.9	47275.1	15323.3	32242.6	57037.2	85844	57459.1	24916	87247.1	163406	105697	48614	60003.3	59145.6	16043.1	5846.09	38764.6	48013.4	0.694545	0.994282	0.550527	0.433256	0.182626	0.299093
796.3592++	2	796.359	0	MLOC_62249.2	SLNTQFAAASSTASR	SLNTQFAAASSTAS[+80]R	119.41	AT2G17980.1	ATSLY1 | Sec1/munc18-like (SM) proteins superfamily | chr2:7824352-7826404 FORWARD LENGTH=627	93.97	0.9932	4.00867e-10	2.2998e-09	169945	299094	157256	263430	54007.3	101613	117515	65812.8	115340	175022	432326	187060	91866.3	71909.7	104874	48381.9	85801.3	109488	147840	98701.5	60184.5	48710	122723	33754.9	0.364238	0.333188	0.348839	0.797971	0.0691739	0.285675
1127.9856++	2	1127.99	0	MLOC_56778.1	QAFDEAISELDTLSEESYK	QAFDEAISELDTLS[+80]EESYK	119.92	AT3G02520.1	GRF7, GF14 NU | general regulatory factor 7 | chr3:526800-527915 REVERSE LENGTH=265	83.35	0.9932	4.62381e-09	1.90535e-08	57144.9	34828.2	28046.1	11059.3	11185.6	50500.2	24393.8	7802.75	20589.9	26465	18848.6	74383.6	18473.3	27344	18225.9	23342.8	33312.3	28617.4	16774.2	43596.5	25848.4	10904.8	48725.7	75576.5	0.587538	0.29582	0.795563	0.460873	0.363191	0.500399
729.3025++	2	729.303	0	MLOC_67948.2	SMSEAAAEAELPR	SM[+16]S[+80]EAAAEAELPR	119.44	AT2G26110.1	| Protein of unknown function (DUF761) | chr2:11120869-11121798 FORWARD LENGTH=309	93.92	0.9931	4.05509e-10	2.32309e-09	76781	108711	165513	114147	60854.1	112179	89789.4	8612.93	186389	168877	189859	164414	133038	86085.7	92330.4	46191.7	155267	118381	147079	289405	33393.3	19775.2	60143.5	18501.8	0.854737	0.506342	0.476789	0.944122	0.888485	0.247583
720.8401++	2	720.84	0	MLOC_74793.3	SLSEAITGAVQER	S[+80]LSEAITGAVQER	117.37	-	-	79.21	0.9931	1.1995e-08	4.32274e-08	67356.7	56550.9	169989	43689.6	29147.2	43428.9	89036.1	18063.3	39553	67331.6	135413	104885	113388	48911.6	79686.6	45954.9	181687	271552	157775	125896	73309.5	36211.1	215443	16073.8	0.694644	0.322343	0.930901	0.358497	0.344192	0.225933
572.7570++	2	572.757	0	MLOC_55658.4	ASSVIAMDVR	ASS[+80]VIAM[+16]DVR	111.52	AT1G17210.1	ATILP1, ILP1 | IAP-like protein 1 | chr1:5880502-5884657 REVERSE LENGTH=958	58.97	0.9931	1.26765e-06	2.70826e-06	36493.1	27661.2	9592.56	49802.6	7774.4	15502.3	15722.4	39328.6	48913.3	18820.1	47475.2	95773.3	13687.1	29223.2	20245.4	15351.5	155820	36670.5	29716.2	101880	41098.4	110053	351954	7412.15	0.302	0.321616	0.96446	0.428772	0.434354	0.991845
552.2382+++	3	552.238	2	MLOC_14236.4	RGYGGSPAHRSPPR	RGYGGS[+80]PAHRS[+80]PPR	100.18	AT3G13570.1	SCL30A, At-SCL30A | SC35-like splicing factor 30A | chr3:4429564-4431602 REVERSE LENGTH=262	35.16	0.9931	0.000304789	0.000380201	473107	4222.17	5917.1	18925.9	12953.7	5876.07	11817.3	10216.8	13716.8	10673.2	6307.49	345019	2777.44	13403.8	11424.2	15146.8	83128	9162.97	21297.3	56539.3	211047	5027.52	7955.03	5740.2	0.33109	0.337771	0.79576	0.424657	0.437742	0.437806
840.4169++	2	840.417	0	MLOC_59994.1	LGSPAQELTFGRPAR	LGS[+80]PAQELTFGRPAR	118.89	AT3G22640.1	PAP85 | cupin family protein | chr3:8011902-8013883 REVERSE LENGTH=486	54.25	0.993	3.75837e-06	7.12931e-06	35798.9	13052.8	321877	147221	41779.9	280398	166564	175058	21389.7	5426.86	43204.9	29222.7	416657	161152	191707	227465	211913	190633	460225	438090	200603	175204	207246	345947	0.831277	0.30883	0.486511	0.913629	0.80227	0.826741
805.9257++	2	805.926	0	MLOC_43588.1	DTFLLPGVVEVTIK	DT[+80]FLLPGVVEVTIK	117.83	AT3G18170.1	| Glycosyltransferase family 61 protein | chr3:6228393-6229547 FORWARD LENGTH=384	30.69	0.993	0.0008531	0.000963357	535380	225769	843280	535433	421398	382592	463873	362503	454972	519187	373386	882673	1.52189e+06	464710	71114.2	524029	951918	46678.1	1.41317e+06	1.43617e+06	438912	598409	302342	578054	0.160402	0.567422	0.39121	0.486995	0.309435	0.495002
592.2770++	2	592.277	1	MLOC_24977.1	GRSELDSLAR	GRSELDS[+80]LAR	119.09	AT2G40170.1	ATEM6, GEA6, EM6 | Stress induced protein | chr2:16779792-16780167 REVERSE LENGTH=92	57.37	0.9929	1.83231e-06	3.76166e-06	62665.9	52377.5	95228.4	45565	303824	34170.7	181513	22442.3	72963.2	50932.1	61360.3	307247	685198	82970.1	68600.7	23376.8	1.20306e+06	979411	837805	299295	507516	17523.7	26780.4	90081.2	0.872523	0.817316	0.615107	0.0557443	0.076578	0.0563106
574.2445+++	3	574.245	1	AK250810.1	KATDDSITLSSAHSK	KAT[+80]DDS[+80]ITLSSAHSK	101.78	AT5G50915.2	| basic helix-loop-helix (bHLH) DNA-binding superfamily protein | chr5:20710764-20712252 REVERSE LENGTH=286	48.24	0.9929	1.49968e-05	2.51713e-05	148307	6163.07	3066.93	98878.8	27735.4	14136.5	12071.4	51841.6	19540.6	19206.1	15990.5	503685	99924.2	9409.61	32200.9	25099.4	111264	51701.7	28521.4	4384.96	14473.7	118622	19009.1	21324.4	0.238997	0.186203	0.560313	0.999807	0.435819	0.656125
873.3886+++	3	873.389	1	MLOC_64351.2	NASTSSDMSSLASQGTPSNSAPLRR	NAS[+80]TSSDM[+16]SSLASQGTPSNSAPLRR	118.55	AT1G64110.3	| P-loop containing nucleoside triphosphate hydrolases superfamily protein | chr1:23796887-23801255 REVERSE LENGTH=8	133.88	0.9928	4.09261e-14	1.00875e-12	885948	980780	2.14422e+06	2.63047e+06	824698	1.10425e+06	1.80692e+06	2.81398e+06	499670	748653	1.31365e+06	1.66077e+06	649110	1.46449e+06	1.82968e+06	1.0007e+06	419859	230331	1.76093e+06	679338	117447	724811	2.82374e+06	2.58378e+06	0.858214	0.0268368	0.211214	0.156233	0.0264415	0.118946
1130.4807+++	3	1130.48	1	MLOC_56942.2	ITPVNESESSETDSDDSSDEDVPAKSPATATK	ITPVNESESSETDSDDSSDEDVPAKS[+80]PATATK	118.09	AT3G18610.1	PARLL1, ATNUC-L2, NUC-L2 | nucleolin like 2 | chr3:6404270-6407822 REVERSE LENGTH=636	130.19	0.9928	9.57194e-14	1.93034e-12	207764	214166	69422.3	7674.32	25374.2	169735	47638	15395.2	105434	23336.8	93909.7	198312	67396.9	10052.4	120011	3997.07	39505	13483.8	22105.6	268810	86653.1	63259.4	29639.4	8905.24	0.705772	0.405277	0.688439	0.714343	0.868367	0.111438
919.4285+++	3	919.428	1	MLOC_11773.1	SYSNLMELAAGGDRDQPTLPSLGQR	S[+80]YSNLMELAAGGDRDQPTLPSLGQR	119.88	AT1G68020.2	ATTPS6, TPS6 | UDP-Glycosyltransferase / trehalose-phosphatase family protein | chr1:25497493-25500241 FORWARD LENGTH	130.1	0.9928	9.77237e-14	1.96086e-12	21247.8	66462.9	239379	17706.6	32231.9	113689	140844	604424	11863.2	23454.3	115752	49165.8	28819	28133.9	220589	261360	25129	14119.1	48858.9	61355.2	11586.9	48286	569229	195113	0.454698	0.175567	0.228096	0.278892	0.162001	0.122027
714.3501++	2	714.35	0	AK371016	VQPVSLASFNSAK	VQPVSLASFNS[+80]AK	119.9	AT4G38710.1	| glycine-rich protein | chr4:18078141-18080002 REVERSE LENGTH=452	60.13	0.9928	9.7051e-07	2.13043e-06	88241.1	133329	177447	151702	68209.6	139292	199725	81451.9	21796.4	84275.7	291964	96593.7	101803	166671	248861	37260.5	267734	252219	120683	56388.8	35112.5	52221.9	192291	43332.5	0.752435	0.484889	0.785591	0.287107	0.0115515	0.587417
505.8922+++	3	505.892	2	AK365615	SGNSDMNVNGKKGK	S[+80]GNSDMNVNGKKGK	92.72	AT2G27100.1	SE | C2H2 zinc-finger protein SERRATE (SE) | chr2:11572587-11576357 FORWARD LENGTH=720	31.15	0.9928	0.000767361	0.000874201	994.413	141939	147120	27579.8	2652.22	9239.66	5140.64	18059.5	44594.9	407932	248525	1368.37	362.341	18535.4	2685.66	1950.98	202710	135078	209806	866.502	11366.3	5588.64	3704.11	4351.13	0.273129	0.222223	0.360508	0.303511	0.807613	0.619811
874.7690+++	3	874.769	0	AK375108	LILFGGATALEGNNATPPSSAGSAGIR	LILFGGATALEGNNAT[+80]PPSSAGSAGIR	119.9	AT1G08420.1	BSL2 | BRI1 suppressor 1 (BSU1)-like 2 | chr1:2649959-2656564 FORWARD LENGTH=1018	122.42	0.9927	5.72796e-13	8.83079e-12	110011	112541	170621	42490.7	71849.2	101485	98073.9	17491.9	50895	55356.4	173271	20188.9	74367.8	120109	109445	4161.14	36985.6	70372	76590.7	9638.7	23631.7	25969.6	91189.2	12870.7	0.665575	0.152408	0.228282	0.491905	0.131628	0.117109
704.8214++	2	704.821	0	MLOC_72171.4	DSDELLVHSVSK	DSDELLVHSVS[+80]K	119.53	AT5G47690.3	| binding | chr5:19317899-19327014 FORWARD LENGTH=1607	56.99	0.9927	1.99986e-06	4.06798e-06	82905.6	71818.1	246255	148261	41856.1	86569.9	97299.7	52941.9	114475	233095	107164	225206	190582	88366.7	67074	24195.9	267404	264356	300476	388419	95800.6	93505.7	32185.8	117666	0.701305	0.493144	0.355534	0.691895	0.451921	0.451405
764.0182+++	3	764.018	0	AK250601.1	SRPSPDYGRPVSPQYGAYGR	SRPS[+80]PDYGRPVSPQYGAYGR	119.64	AT3G61860.1	ATRSP31, RSP31, At-RS31, RS31 | RNA-binding (RRM/RBD/RNP motifs) family protein | chr3:22900311-22902159 REVERSE LENG	61.1	0.9925	7.76247e-07	1.73742e-06	314618	248422	170180	55494	334147	768114	103801	6608.71	235278	278740	247070	49979.9	355578	749909	134249	12035.3	119801	115170	196915	33992	101843	127917	143145	25119.9	0.911647	0.789822	0.0899608	0.334027	0.237649	0.0921928
1091.4126++	2	1091.41	1	MLOC_65125.1	GDGSPSRDGPDDQMFDSFR	GDGS[+80]PSRDGPDDQM[+16]FDSFR	119.02	AT2G27100.1	SE | C2H2 zinc-finger protein SERRATE (SE) | chr2:11572587-11576357 FORWARD LENGTH=720	99.68	0.9923	1.07647e-10	7.51456e-10	239465	243831	144298	448461	120772	116183	101514	117277	101880	366950	137029	376164	122062	130302	142760	66399.7	337750	617944	280311	158691	123872	14577.9	35436.6	24226.8	0.25237	0.66847	0.427314	0.436039	0.451641	0.188113
744.8422++	2	744.842	0	MLOC_58431.1	QITSPYSGPFSPK	QITSPYSGPFS[+80]PK	118.8	AT3G06290.1	| SAC3/GANP/Nin1/mts3/eIF-3 p25 family | chr3:1899123-1907297 REVERSE LENGTH=1697	50.54	0.9923	8.8308e-06	1.54791e-05	30046.1	103191	48159.8	35529.3	27882.3	205133	186992	96009.7	43541.1	175219	155268	49594.8	56866.3	57010.7	56101.6	52237.8	40536.3	67710.1	49173.7	51287.8	35426.7	24558.2	65637.2	79387.3	0.136171	0.325952	0.333221	0.427769	0.281453	0.102961
[truncated: 1,481 more rows]
