# Supplementary material for: Comparative Phosphoproteomic Analysis of Barley Embryos with Different Dormancy during Imbibition
Source: Int J Mol Sci. 2019 Jan 21;20(2):451. doi: 10.3390/ijms20020451 (PMC6359383; doi:10.3390/ijms20020451)
Supplement: Supplementary file 1 [file ijms-20-00451-s001.zip › ijms-418799 sp for proof 1.18/Table S2.xlsx]

## Sheet: up_FH
Table S2 List of responded phosphopeptides during imbibition. (1/4)
Quantitative data of phosphopeptides were derived from FH and AR grains treated with imbibition. This list shows phosphopeptides which were upregulated or downregulated in FH or AR grains with p-value less than 0.05 for at least one of the time points analyzed.
Acc No.	Ortholog	Description	Peptide(seq+mod)
MLOC_5540.1	AT3G22850.1	| Aluminium induced protein with YGL and LRDR motifs | chr3:8089067-8090275 FORWARD LENGTH=248	VGS[+80]AADWSSQY
MLOC_59068.1	AT3G48530.1	KING1 | SNF1-related protein kinase regulatory subunit gamma 1 | chr3:17987559-17989592 FORWARD LENGTH=424	LGS[+80]FTFR
AK251924.1	AT4G11560.1	| bromo-adjacent homology (BAH) domain-containing protein | chr4:7000095-7003445 REVERSE LENGTH=587	S[+80]FIKPKPEEPSAPTLEK
MLOC_60667.3	AT2G03440.1	NRP1, ATNRP1 | nodulin-related protein 1 | chr2:1039409-1039972 REVERSE LENGTH=187	TAEAAADLLHAAS[+80]LYGK
MLOC_13881.1	AT5G24130.1	| unknown protein; FUNCTIONS IN: molecular_function unknown; INVOLVED IN: biological_process unknown; LOCATED IN: mi	APPVPPPPEGS[+80]YK
AK366111	AT3G10770.1	| Single-stranded nucleic acid binding R3H protein | chr3:3372461-3374026 REVERSE LENGTH=333	STS[+80]LELNPNTR
AK369330	AT2G38280.2	FAC1, ATAMPD | AMP deaminase, putative / myoadenylate deaminase, putative | chr2:16033767-16038793 REVERSE LENGTH=839	SHSIS[+80]NDLHAVQPDPVAADILR
AK369330	AT2G38280.2	FAC1, ATAMPD | AMP deaminase, putative / myoadenylate deaminase, putative | chr2:16033767-16038793 REVERSE LENGTH=839	SHS[+80]ISNDLHAVQPDPVAADILR
MLOC_11070.1	AT1G69230.2	SP1L2 | SPIRAL1-like2 | chr1:26026543-26027085 REVERSE LENGTH=110	GGS[+80]AGGGQSSLGYLFGDGEPAKPAAAPAAK
MLOC_56942.2	AT3G18610.1	PARLL1, ATNUC-L2, NUC-L2 | nucleolin like 2 | chr3:6404270-6407822 REVERSE LENGTH=636	DGGS[+80]FGKPSGGPSLSVFVK
AK376810	AT3G53040.1	| late embryogenesis abundant protein, putative / LEA protein, putative | chr3:19664797-19666405 REVERSE LENGTH=479	ASDTAAYIKDS[+80]VK
AK369180	AT1G09815.1	POLD4 | polymerase delta 4 | chr1:3189460-3190050 FORWARD LENGTH=124	AQTAALISHGS[+80]FDLK
MLOC_10832.5	AT1G24706.1	THO2, AtTHO2 | THO2 | chr1:8742210-8755243 FORWARD LENGTH=1804	FRGQS[+80]LPPPPPLPTSFVPQSVAANR
AK363748	AT4G26750.1	| hydroxyproline-rich glycoprotein family protein | chr4:13475848-13478382 REVERSE LENGTH=421	RDS[+80]FSAVQPGNVSSR
MLOC_43148.2	AT2G29200.1	APUM1, PUM1 | pumilio 1 | chr2:12549483-12553185 REVERSE LENGTH=968	NNELSSHAYASILGPSLS[+80]R
MLOC_64351.2	AT1G64110.3	| P-loop containing nucleoside triphosphate hydrolases superfamily protein | chr1:23796887-23801255 REVERSE LENGTH=8	NAS[+80]TSSDM[+16]SSLASQGTPSNSAPLRR
MLOC_56942.2	AT3G18610.1	PARLL1, ATNUC-L2, NUC-L2 | nucleolin like 2 | chr3:6404270-6407822 REVERSE LENGTH=636	TRDGGS[+80]FGKPSGGPSLSVFVK
MLOC_70666.2	AT3G15970.1	| NUP50 (Nucleoporin 50 kDa) protein | chr3:5408982-5410379 REVERSE LENGTH=465	DSS[+80]NAPLFGLK
MLOC_58904.1	AT2G31200.1	ADF6, ATADF6 | actin depolymerizing factor 6 | chr2:13294171-13294948 FORWARD LENGTH=146	TSS[+80]NASSGM[+16]GVAPDIR
MLOC_5772.2	AT5G40370.1	| Glutaredoxin family protein | chr5:16147826-16149052 REVERSE LENGTH=111	LVALLTEAGAISGS[+80]TSK
AK357977	AT2G03510.1	| SPFH/Band 7/PHB domain-containing membrane-associated protein family | chr2:1066717-1068934 FORWARD LENGTH=356	LPTPSPSLSQQQS[+80]R
MLOC_77777.3	AT1G52690.2	| Late embryogenesis abundant protein (LEA) family protein | chr1:19619842-19620589 FORWARD LENGTH=169	T[+80]GSALQQAGETVVNAVVGAK
MLOC_77777.3	AT1G52690.2	| Late embryogenesis abundant protein (LEA) family protein | chr1:19619842-19620589 FORWARD LENGTH=169	TGS[+80]ALQQAGETVVNAVVGAK
MLOC_68317.1	AT5G06760.1	LEA4-5 | Late Embryogenesis Abundant 4-5 | chr5:2089754-2090313 REVERSE LENGTH=158	S[+80]RAGSSDDGYLPVTGAGHAVGEGGGHQLPAR
MLOC_70601.1	AT2G33690.1	| Late embryogenesis abundant protein, group 6 | chr2:14252199-14252414 FORWARD LENGTH=71	AGDSVQLPTETS[+80]PYVQYNK
AK372616	AT1G43700.1	VIP1, SUE3 | VIRE2-interacting protein 1 | chr1:16484352-16486017 FORWARD LENGTH=341	RS[+80]GSM[+16]DGVNSPFEGESALSGGPLDYAK
MLOC_5772.2	AT5G40370.1	| Glutaredoxin family protein | chr5:16147826-16149052 REVERSE LENGTH=111	LVALLTEAGAISGST[+80]SK
MLOC_65534.7	AT5G18070.1	DRT101 | phosphoglucosamine mutase-related | chr5:5981117-5982787 FORWARD LENGTH=556	LGGAAVGLVIT[+80]ASHNPVGDNGVK
AK251409.1	AT4G26270.1	PFK3 | phosphofructokinase 3 | chr4:13301094-13304030 REVERSE LENGTH=489	NAS[+80]NVSLADAAHVK
MLOC_544.3	AT1G74910.2	| ADP-glucose pyrophosphorylase family protein | chr1:28135770-28138456 REVERSE LENGTH=415	VSS[+80]FEALQSAM[+16]K
MLOC_61272.1	AT4G31160.1	DCAF1 | DDB1-CUL4 associated factor 1 | chr4:15145936-15152939 FORWARD LENGTH=1883	ALVFSSS[+80]FSK
AK371016	AT4G38710.1	| glycine-rich protein | chr4:18078141-18080002 REVERSE LENGTH=452	M[+16]GGFGGDSFS[+80]SR
MLOC_11260.1	AT5G59710.1	VIP2, AtVIP2 | VIRE2 interacting protein 2 | chr5:24058157-24061736 FORWARD LENGTH=614	NASLSGIPS[+80]PGVQQPGGNISGSR
MLOC_76316.1	AT5G42820.1	ATU2AF35B, U2AF35B | Zinc finger C-x8-C-x5-C-x3-H type family protein | chr5:17170445-17171296 REVERSE LENGTH=283	DRGDYYGGS[+80]LDRGDYGDYYHHSR
AK250601.1	AT3G61860.1	ATRSP31, RSP31, At-RS31, RS31 | RNA-binding (RRM/RBD/RNP motifs) family protein | chr3:22900311-22902159 REVERSE LENG	SRPSPDYGRPVS[+80]PQYGAYGR
MLOC_5598.2	AT1G15340.1	MBD10 | methyl-CPG-binding domain 10 | chr1:5275895-5277474 REVERSE LENGTH=384	ENEKPAES[+80]EEVPVEFEMSDPVLEHVEDEKPAEYEVTAVEGEK
MLOC_54389.1	AT3G63400.2	| Cyclophilin-like peptidyl-prolyl cis-trans isomerase family protein | chr3:23412449-23415435 FORWARD LENGTH=387	KAS[+80]IVPVLTGNR
MLOC_54389.1	AT3G63400.2	| Cyclophilin-like peptidyl-prolyl cis-trans isomerase family protein | chr3:23412449-23415435 FORWARD LENGTH=387	ATSQIS[+80]AEDHTAVAALK
MLOC_60439.1	AT3G21290.1	| dentin sialophosphoprotein-related | chr3:7482318-7488676 FORWARD LENGTH=1192	IEIGGS[+80]PVSAAGDEK
MLOC_25886.1	AT3G14890.1	| phosphoesterase | chr3:5008751-5013060 FORWARD LENGTH=694	DQTAVSPLEVPS[+80]PK
MLOC_19482.1	AT3G15670.1	| Late embryogenesis abundant protein (LEA) family protein | chr3:5310141-5310901 REVERSE LENGTH=225	DRAAEGKDEAGS[+80]YLGR
AK362649	AT1G22920.1	CSN5A, JAB1, AJH1 | COP9 signalosome 5A | chr1:8109882-8111895 REVERSE LENGTH=357	ASASGAAPDS[+80]PVPEPMVEA
AK376810	AT3G53040.1	| late embryogenesis abundant protein, putative / LEA protein, putative | chr3:19664797-19666405 REVERSE LENGTH=479	GAVTVTQAPGATVVS[+80]YQEHK
MLOC_64351.2	AT1G64110.3	| P-loop containing nucleoside triphosphate hydrolases superfamily protein | chr1:23796887-23801255 REVERSE LENGTH=8	M[+16]SGLLQSFTM[+16]T[+80]PQK
MLOC_9854.1	AT3G51810.1	ATEM1, GEA1, AT3, EM1 | Stress induced protein | chr3:19214818-19215461 FORWARD LENGTH=152	ATGS[+80]GNERAEGEGGVVIEPDEK
AK252395.1	AT3G60600.1	VAP27-1, VAP, (AT)VAP, VAP27 | vesicle associated protein | chr3:22400537-22402408 FORWARD LENGTH=256	SADLGTEVGS[+80]PTGPAVR
MLOC_81766.1	AT5G42920.2	THO5, AtTHO5 | THO complex, subunit 5 | chr5:17206310-17209522 REVERSE LENGTH=819	LSVSHS[+80]FGR
MLOC_32718.4	AT3G58600.1	| Adaptin ear-binding coat-associated protein 1 NECAP-1 | chr3:21668746-21670999 REVERSE LENGTH=302	LPPPPPSPVS[+80]PTDSGVAM[+16]SPFK
AK250233.1	AT5G56580.1	ATMKK6, ANQ1, MKK6 | MAP kinase kinase 6 | chr5:22904851-22906620 REVERSE LENGTH=356	FLTASGT[+80]FK
MLOC_56006.1	AT5G16880.2	| Target of Myb protein 1 | chr5:5549658-5551274 FORWARD LENGTH=407	YEDLKEPIVAEPEPEPAM[+16]IPVTVEPEES[+80]PRAVGK
MLOC_74793.3	-	-	SLS[+80]EAITGAVQER
MLOC_61230.2	AT1G06410.1	ATTPS7, TPS7, ATTPSA | trehalose-phosphatase/synthase 7 | chr1:1955413-1958153 FORWARD LENGTH=851	TLT[+80]TPGTLTDLDEER
MLOC_79392.2	AT5G52200.2	| phosphoprotein phosphatase inhibitors | chr5:21202818-21204017 REVERSE LENGTH=211	TPYHPM[+16]M[+16]DEDGSLS[+80]PTRPFDK
MLOC_10405.1	AT1G53310.3	ATPPC1, PEPC1, ATPEPC1, PPC1 | phosphoenolpyruvate carboxylase 1 | chr1:19884261-19888070 REVERSE LENGTH=967	LSS[+80]IDAQLR
MLOC_38489.2	AT5G58040.1	ATFIP1[V], FIPS5, ATFIPS5, FIP1[V] | homolog of yeast FIP1 [V] | chr5:23488865-23494000 FORWARD LENGTH=1196	DM[+16]LTSDVHGRS[+80]PPNYK
MLOC_67837.1	AT1G24300.2	| GYF domain-containing protein | chr1:8614515-8620420 REVERSE LENGTH=1490	LQEQLS[+80]GSHM[+16]GR
AK367694	AT3G13300.1	VCS | Transducin/WD40 repeat-like superfamily protein | chr3:4304085-4309949 FORWARD LENGTH=1344	YSVEESRSPS[+80]GR
AK373763	AT3G22490.1	| Seed maturation protein | chr3:7969785-7970738 REVERSE LENGTH=262	ITIGEALEAAGYS[+80]AGGRPVER
AK373549	AT2G18540.1	| RmlC-like cupins superfamily protein | chr2:8042382-8045008 REVERSE LENGTH=707	QGFGVSS[+80]GVVEAITSAK
AK364999	AT4G17890.1	AGD8 | ARF-GAP domain 8 | chr4:9937121-9939146 FORWARD LENGTH=413	NEPEPEIIRS[+80]PKAPTHSFK
MLOC_17849.1	AT5G52200.1	| phosphoprotein phosphatase inhibitors | chr5:21202818-21204719 REVERSE LENGTH=191	TGS[+80]LVEDEAHANER
AK357525	-	-	YAAPQPGTGAT[+80]PPSSSPLTQQAM[+16]DGK
AK372197	AT2G29200.1	APUM1, PUM1 | pumilio 1 | chr2:12549483-12553185 REVERSE LENGTH=968	QSS[+80]FSGLFQDDSYQHDTNR
AK376070	AT5G58000.1	| Reticulon family protein | chr5:23477416-23479496 FORWARD LENGTH=487	SRS[+80]DAAATAGAVVAK
MLOC_57730.3	AT4G26760.1	MAP65-2 | microtubule-associated protein 65-2 | chr4:13478834-13481300 REVERSE LENGTH=578	EDASSHISGTDLAPTT[+80]P
MLOC_12678.2	AT5G66780.1	| unknown protein; Has 1807 Blast hits to 1807 proteins in 277 species: Archae - 0; Bacteria - 0; Metazoa - 736; Fun	TTTAHGDVM[+16]THS[+80]FGEGYSTR
AK374525	AT4G38900.3	| Basic-leucine zipper (bZIP) transcription factor family protein | chr4:18139564-18141520 REVERSE LENGTH=547	S[+80]PTPLDLAAASAYHHR
MLOC_5484.1	AT2G41740.1	VLN2, ATVLN2 | villin 2 | chr2:17410962-17416878 REVERSE LENGTH=976	ASALAALSNAFNPSSKPKT[+80]PPPSR
MLOC_30711.1	AT4G10730.1	| Protein kinase superfamily protein | chr4:6609793-6614786 REVERSE LENGTH=711	SAS[+80]VGDWIVNAKPTSNSHHLK
AK375664	AT2G40170.1	ATEM6, GEA6, EM6 | Stress induced protein | chr2:16779792-16780167 REVERSE LENGTH=92	EGETVVPGGTGGKS[+80]LEAQQNLAEGR
AK371874	AT5G04280.1	| RNA-binding (RRM/RBD/RNP motifs) family protein with retrovirus zinc finger-like domain | chr5:1192461-1195413 FOR	EC[+57]PYSVGGRPGRYS[+80]PPSR
AK360420	AT2G13440.1	| glucose-inhibited division family A protein | chr2:5593270-5598296 REVERSE LENGTH=723	VLNS[+80]SKGPAVRALR
MLOC_36880.3	AT3G09670.2	| Tudor/PWWP/MBT superfamily protein | chr3:2966637-2968817 FORWARD LENGTH=726	RSLDSFEDLGTKS[+80]PTGR
MLOC_17792.1	AT1G25260.1	| Ribosomal protein L10 family protein | chr1:8854163-8855766 REVERSE LENGTH=235	EGLAHLGGEEDDES[+80]S
MLOC_67498.3	AT1G55540.1	emb1011 | Nuclear pore complex protein | chr1:20734759-20743049 REVERSE LENGTH=1816	LIQRFPS[+80]TK
AK375506	AT1G65090.3	| unknown protein; FUNCTIONS IN: molecular_function unknown; INVOLVED IN: biological_process unknown; LOCATED IN: ce	RS[+80]AEDM[+16]PPRDSESPAPVFHGEDDTVQGK
MLOC_37423.1	AT3G59580.2	| Plant regulator RWP-RK family protein | chr3:22009652-22012721 FORWARD LENGTH=894	TALLSC[+57]DAVSS[+80]PSVGK
AK248611.1	AT1G44780.1	| CONTAINS InterPro DOMAIN/s: Histone chaperone domain CHZ (InterPro:IPR019098); BEST Arabidopsis thaliana protein m	S[+80]ASSFIPLAVPK
AK376722	AT5G57610.1	| Protein kinase superfamily protein with octicosapeptide/Phox/Bem1p domain | chr5:23325307-23329099 FORWARD LENGTH=	IVGHDIPAGVENSSS[+80]LGPR
AK375506	AT1G65090.3	| unknown protein; FUNCTIONS IN: molecular_function unknown; INVOLVED IN: biological_process unknown; LOCATED IN: ce	RSAEDM[+16]PPRDSES[+80]PAPVFHGEDDTVQGK
MLOC_68729.1	AT5G35560.1	| DENN (AEX-3) domain-containing protein | chr5:13742458-13747464 REVERSE LENGTH=765	TPSFS[+80]ELNEILLGQEHLK
AK372616	AT1G43700.1	VIP1, SUE3 | VIRE2-interacting protein 1 | chr1:16484352-16486017 FORWARD LENGTH=341	RSGSM[+16]DGVNS[+80]PFEGESALSGGPLDYAK
MLOC_67899.1	AT5G13200.1	| GRAM domain family protein | chr5:4207081-4208079 FORWARD LENGTH=272	AM[+16]DGQDAAAPQPGAPPHPS[+80]SPLTQQAM[+16]ELEGK
AK375506	AT1G65090.3	| unknown protein; FUNCTIONS IN: molecular_function unknown; INVOLVED IN: biological_process unknown; LOCATED IN: ce	RSAEDM[+16]PPRDS[+80]ESPAPVFHGEDDTVQGK
MLOC_11773.1	AT1G68020.2	ATTPS6, TPS6 | UDP-Glycosyltransferase / trehalose-phosphatase family protein | chr1:25497493-25500241 FORWARD LENGTH	SYS[+80]NLM[+16]ELAAGGDR
AK353750	-	-	KLEAGRPPSLPAS[+80]PALEATK
MLOC_55003.1	AT1G19870.1	iqd32 | IQ-domain 32 | chr1:6895400-6898539 REVERSE LENGTH=794	S[+80]NSSSFLDAPSKPK
MLOC_34492.1	AT3G62940.1	| Cysteine proteinases superfamily protein | chr3:23263106-23264197 REVERSE LENGTH=316	HAAELASFGYKPAES[+80]SEK
MLOC_64351.2	AT1G64110.3	| P-loop containing nucleoside triphosphate hydrolases superfamily protein | chr1:23796887-23801255 REVERSE LENGTH=8	M[+16]SGLLQSFT[+80]M[+16]TPQK
MLOC_67498.3	AT1G55540.1	emb1011 | Nuclear pore complex protein | chr1:20734759-20743049 REVERSE LENGTH=1816	LIQRFPST[+80]K
AK372616	AT1G43700.1	VIP1, SUE3 | VIRE2-interacting protein 1 | chr1:16484352-16486017 FORWARD LENGTH=341	RSGS[+80]M[+16]DGVNSPFEGESALSGGPLDYAK
AK366111	AT3G10770.1	| Single-stranded nucleic acid binding R3H protein | chr3:3372461-3374026 REVERSE LENGTH=333	S[+80]TSLELNPNTR
AK353672	AT5G13510.1	| Ribosomal protein L10 family protein | chr5:4341294-4341956 FORWARD LENGTH=220	AS[+80]LPST[+80]ARLLVAKNSDLAAAVEGTR
MLOC_55154.1	AT1G65810.1	| P-loop containing nucleoside triphosphate hydrolases superfamily protein | chr1:24477043-24480728 REVERSE LENGTH=1	SLLVNM[+16]LEC[+57]RTS[+80]K
AK355067	AT2G33490.1	| hydroxyproline-rich glycoprotein family protein | chr2:14183552-14187666 FORWARD LENGTH=623	SVFHS[+80]SPLNPSTHR
AK364391	AT5G28900.1	| Calcium-binding EF-hand family protein | chr5:10925852-10929892 FORWARD LENGTH=536	GSSAGPSS[+80]LGSPLK
MLOC_38489.2	AT5G58040.1	ATFIP1[V], FIPS5, ATFIPS5, FIP1[V] | homolog of yeast FIP1 [V] | chr5:23488865-23494000 FORWARD LENGTH=1196	DM[+16]LTS[+80]DVHGRSPPNYK
MLOC_5133.1	AT5G46020.1	| CONTAINS InterPro DOMAIN/s: Casein kinase substrate, phosphoprotein PP28 (InterPro:IPR019380); Has 30201 Blast hit	NFSTPEEIASGTS[+80]GRPRSFKK

## Sheet: up_AR
Table S2 List of responded phosphopeptides during imbibition. (2/4)
Quantitative data of phosphopeptides were derived from FH and AR grains treated with imbibition. This list shows phosphopeptides which were upregulated or downregulated in FH or AR grains with p-value less than 0.05 for at least one of the time points analyzed.
Acc No.	Ortholog	Description	Peptide(seq+mod)
MLOC_5540.1	AT3G22850.1	| Aluminium induced protein with YGL and LRDR motifs | chr3:8089067-8090275 FORWARD LENGTH=248	VGS[+80]AADWSSQY
MLOC_59068.1	AT3G48530.1	KING1 | SNF1-related protein kinase regulatory subunit gamma 1 | chr3:17987559-17989592 FORWARD LENGTH=424	LGS[+80]FTFR
AK251924.1	AT4G11560.1	| bromo-adjacent homology (BAH) domain-containing protein | chr4:7000095-7003445 REVERSE LENGTH=587	S[+80]FIKPKPEEPSAPTLEK
MLOC_60667.3	AT2G03440.1	NRP1, ATNRP1 | nodulin-related protein 1 | chr2:1039409-1039972 REVERSE LENGTH=187	TAEAAADLLHAAS[+80]LYGK
MLOC_13881.1	AT5G24130.1	| unknown protein; FUNCTIONS IN: molecular_function unknown; INVOLVED IN: biological_process unknown; LOCATED IN: mi	APPVPPPPEGS[+80]YK
AK366111	AT3G10770.1	| Single-stranded nucleic acid binding R3H protein | chr3:3372461-3374026 REVERSE LENGTH=333	STS[+80]LELNPNTR
AK369330	AT2G38280.2	FAC1, ATAMPD | AMP deaminase, putative / myoadenylate deaminase, putative | chr2:16033767-16038793 REVERSE LENGTH=839	SHSIS[+80]NDLHAVQPDPVAADILR
AK369330	AT2G38280.2	FAC1, ATAMPD | AMP deaminase, putative / myoadenylate deaminase, putative | chr2:16033767-16038793 REVERSE LENGTH=839	SHS[+80]ISNDLHAVQPDPVAADILR
MLOC_11070.1	AT1G69230.2	SP1L2 | SPIRAL1-like2 | chr1:26026543-26027085 REVERSE LENGTH=110	GGS[+80]AGGGQSSLGYLFGDGEPAKPAAAPAAK
MLOC_56942.2	AT3G18610.1	PARLL1, ATNUC-L2, NUC-L2 | nucleolin like 2 | chr3:6404270-6407822 REVERSE LENGTH=636	DGGS[+80]FGKPSGGPSLSVFVK
AK376810	AT3G53040.1	| late embryogenesis abundant protein, putative / LEA protein, putative | chr3:19664797-19666405 REVERSE LENGTH=479	ASDTAAYIKDS[+80]VK
AK369180	AT1G09815.1	POLD4 | polymerase delta 4 | chr1:3189460-3190050 FORWARD LENGTH=124	AQTAALISHGS[+80]FDLK
MLOC_10832.5	AT1G24706.1	THO2, AtTHO2 | THO2 | chr1:8742210-8755243 FORWARD LENGTH=1804	FRGQS[+80]LPPPPPLPTSFVPQSVAANR
AK363748	AT4G26750.1	| hydroxyproline-rich glycoprotein family protein | chr4:13475848-13478382 REVERSE LENGTH=421	RDS[+80]FSAVQPGNVSSR
MLOC_43148.2	AT2G29200.1	APUM1, PUM1 | pumilio 1 | chr2:12549483-12553185 REVERSE LENGTH=968	NNELSSHAYASILGPSLS[+80]R
MLOC_64351.2	AT1G64110.3	| P-loop containing nucleoside triphosphate hydrolases superfamily protein | chr1:23796887-23801255 REVERSE LENGTH=8	NAS[+80]TSSDM[+16]SSLASQGTPSNSAPLRR
MLOC_56942.2	AT3G18610.1	PARLL1, ATNUC-L2, NUC-L2 | nucleolin like 2 | chr3:6404270-6407822 REVERSE LENGTH=636	TRDGGS[+80]FGKPSGGPSLSVFVK
MLOC_70666.2	AT3G15970.1	| NUP50 (Nucleoporin 50 kDa) protein | chr3:5408982-5410379 REVERSE LENGTH=465	DSS[+80]NAPLFGLK
MLOC_58904.1	AT2G31200.1	ADF6, ATADF6 | actin depolymerizing factor 6 | chr2:13294171-13294948 FORWARD LENGTH=146	TSS[+80]NASSGM[+16]GVAPDIR
MLOC_5772.2	AT5G40370.1	| Glutaredoxin family protein | chr5:16147826-16149052 REVERSE LENGTH=111	LVALLTEAGAISGS[+80]TSK
AK357977	AT2G03510.1	| SPFH/Band 7/PHB domain-containing membrane-associated protein family | chr2:1066717-1068934 FORWARD LENGTH=356	LPTPSPSLSQQQS[+80]R
MLOC_77777.3	AT1G52690.2	| Late embryogenesis abundant protein (LEA) family protein | chr1:19619842-19620589 FORWARD LENGTH=169	T[+80]GSALQQAGETVVNAVVGAK
MLOC_77777.3	AT1G52690.2	| Late embryogenesis abundant protein (LEA) family protein | chr1:19619842-19620589 FORWARD LENGTH=169	TGS[+80]ALQQAGETVVNAVVGAK
MLOC_68317.1	AT5G06760.1	LEA4-5 | Late Embryogenesis Abundant 4-5 | chr5:2089754-2090313 REVERSE LENGTH=158	S[+80]RAGSSDDGYLPVTGAGHAVGEGGGHQLPAR
MLOC_70601.1	AT2G33690.1	| Late embryogenesis abundant protein, group 6 | chr2:14252199-14252414 FORWARD LENGTH=71	AGDSVQLPTETS[+80]PYVQYNK
AK372616	AT1G43700.1	VIP1, SUE3 | VIRE2-interacting protein 1 | chr1:16484352-16486017 FORWARD LENGTH=341	RS[+80]GSM[+16]DGVNSPFEGESALSGGPLDYAK
MLOC_5772.2	AT5G40370.1	| Glutaredoxin family protein | chr5:16147826-16149052 REVERSE LENGTH=111	LVALLTEAGAISGST[+80]SK
MLOC_65534.7	AT5G18070.1	DRT101 | phosphoglucosamine mutase-related | chr5:5981117-5982787 FORWARD LENGTH=556	LGGAAVGLVIT[+80]ASHNPVGDNGVK
AK367340	AT2G02570.4	| nucleic acid binding;RNA binding | chr2:698361-700794 REVERSE LENGTH=300	NDVGLS[+80]PPNYSAGVQSEALDDLSQSHEK
MLOC_6831.3	AT3G18380.1	| sequence-specific DNA binding transcription factors;sequence-specific DNA binding | chr3:6311002-6313181 REVERSE L	IALDTSISNNEDALS[+80]PDLPK
MLOC_63525.2	AT2G19810.1	| CCCH-type zinc finger family protein | chr2:8550419-8551498 FORWARD LENGTH=359	GSWPGVGS[+80]PVNDVLASLR
MLOC_5598.2	AT1G15340.1	MBD10 | methyl-CPG-binding domain 10 | chr1:5275895-5277474 REVERSE LENGTH=384	S[+80]ENGLAVESIVPPPASSEEK
AK375506	AT1G65090.3	| unknown protein; FUNCTIONS IN: molecular_function unknown; INVOLVED IN: biological_process unknown; LOCATED IN: ce	EAVQVSGEQS[+80]FR
MLOC_65794.1	AT2G35300.1	LEA18 | Late embryogenesis abundant protein, group 1 protein | chr2:14863066-14863359 REVERSE LENGTH=97	GHHGPVGAPVAPDPAYPAS[+80]GGHPAAEK
MLOC_75540.1	AT3G42170.1	| BED zinc finger ;hAT family dimerisation domain | chr3:14321838-14323928 FORWARD LENGTH=696	DYVAQPLPLT[+80]PAYVEQGK
MLOC_61272.1	AT4G31160.1	DCAF1 | DDB1-CUL4 associated factor 1 | chr4:15145936-15152939 FORWARD LENGTH=1883	GLSVAVDS[+80]PTAAFHPGR
MLOC_19482.1	AT3G15670.1	| Late embryogenesis abundant protein (LEA) family protein | chr3:5310141-5310901 REVERSE LENGTH=225	TGS[+80]VLGQAGEQVK
MLOC_544.3	AT1G74910.2	| ADP-glucose pyrophosphorylase family protein | chr1:28135770-28138456 REVERSE LENGTH=415	VSS[+80]FEALQSAMK
AK355067	AT2G33490.1	| hydroxyproline-rich glycoprotein family protein | chr2:14183552-14187666 FORWARD LENGTH=623	LHTYVLPTPNDVQATSQTIAGNPTSGS[+80]PIESK
MLOC_74793.3	-	-	LGDLGGPVVEDPAAPNSRT[+80]PMPR
MLOC_81502.2	AT1G06410.1	ATTPS7, TPS7, ATTPSA | trehalose-phosphatase/synthase 7 | chr1:1955413-1958153 FORWARD LENGTH=851	S[+80]YTNLLDLAEGNFAALGPAGGGAR
MLOC_62156.1	AT5G20280.1	ATSPS1F, SPS1F | sucrose phosphate synthase 1F | chr5:6844994-6849997 REVERSE LENGTH=1043	IGS[+80]TDAIDVWANQHK
MLOC_11310.6	AT2G28290.1	SYD, CHR3 | P-loop containing nucleoside triphosphate hydrolases superfamily protein | chr2:12056771-12072950 FORWARD	SQEIAS[+80]PAPSGPQQSYFQGDK
MLOC_60302.1	AT1G34220.2	| Regulator of Vps4 activity in the MVB pathway protein | chr1:12463102-12465911 REVERSE LENGTH=619	ESHHQTEVTQKPVFDHQDS[+80]FSNDSEGYGPAHVPQR
MLOC_5598.2	AT1G15340.1	MBD10 | methyl-CPG-binding domain 10 | chr1:5275895-5277474 REVERSE LENGTH=384	SENGLAVESIVPPPASS[+80]EEK
MLOC_61507.1	AT5G27540.2	MIRO1 | MIRO-related GTP-ase 1 | chr5:9722816-9727112 FORWARD LENGTH=648	LPADYFPDRVPITIVDT[+80]SSSPEQKPK
AK356539	AT4G01400.2	| FUNCTIONS IN: molecular_function unknown; INVOLVED IN: biological_process unknown; LOCATED IN: cellular_component	S[+80]PRPDSAAAADVSADAAPSLDFGDPASLAALR
MLOC_19482.1	AT3G15670.1	| Late embryogenesis abundant protein (LEA) family protein | chr3:5310141-5310901 REVERSE LENGTH=225	T[+80]GSVLGQAGEQVK
MLOC_61230.2	AT1G06410.1	ATTPS7, TPS7, ATTPSA | trehalose-phosphatase/synthase 7 | chr1:1955413-1958153 FORWARD LENGTH=851	SYT[+80]NLLDLANGNLSALDYGGSGGGGGGRPPRPR
MLOC_64258.1	AT5G05010.2	| clathrin adaptor complexes medium subunit family protein | chr5:1477137-1479872 FORWARD LENGTH=527	AEGEVILEDVQPSS[+80]VSSR
MLOC_60302.1	AT1G34220.2	| Regulator of Vps4 activity in the MVB pathway protein | chr1:12463102-12465911 REVERSE LENGTH=619	ESHHQTEVTQKPVFDHQDSFS[+80]NDSEGYGPAHVPQR
MLOC_74303.1	AT5G03280.1	EIN2, PIR2, CKR1, ERA3, ORE3, ORE2, ATEIN2 | NRAMP metal ion transporter family protein | chr5:788589-793066 FORWARD	APSYPDGPPSLTFS[+80]R
MLOC_10832.5	AT1G24706.1	THO2, AtTHO2 | THO2 | chr1:8742210-8755243 FORWARD LENGTH=1804	EVLSQAADGVLDTNPTS[+80]PLVGTNGNVHPAPR
AK363748	AT4G26750.1	| hydroxyproline-rich glycoprotein family protein | chr4:13475848-13478382 REVERSE LENGTH=421	FNDHVSAQAHFSPPPPPS[+80]EFSSPR
MLOC_81502.2	AT1G06410.1	ATTPS7, TPS7, ATTPSA | trehalose-phosphatase/synthase 7 | chr1:1955413-1958153 FORWARD LENGTH=851	SYT[+80]NLLDLAEGNFAALGPAGGGAR
AK248370.1	AT5G15870.1	| glycosyl hydrolase family 81 protein | chr5:5182641-5184878 REVERSE LENGTH=745	RPAPPS[+80]PAGHVFPQAASTVLPDPAR
AK358522	AT2G33830.1	| Dormancy/auxin associated family protein | chr2:14309768-14310286 REVERSE LENGTH=106	GLGANLFDRPQPNS[+80]PTVYDWLYSDETR
AK364491	AT4G36020.1	CSDP1 | cold shock domain protein 1 | chr4:17043443-17044342 REVERSE LENGTH=299	GGDGS[+80]GGYGGGYGGGGGGGWGGQR
MLOC_59292.1	AT2G36640.1	ATECP63, ECP63 | embryonic cell protein 63 | chr2:15357019-15358552 REVERSE LENGTH=448	SATENIFGS[+80]AQGLTQVLK
MLOC_36424.1	AT5G07350.1	Tudor1, AtTudor1, TSN1 | TUDOR-SN protein 1 | chr5:2320344-2324892 REVERSE LENGTH=991	LWQYGDVES[+80]DEEEQAPGGR
MLOC_79165.2	AT3G22490.1	| Seed maturation protein | chr3:7969785-7970738 REVERSE LENGTH=262	VTIGEAM[+16]EAAALS[+80]AGDRPLEETDAAAIR
MLOC_7217.1	AT3G13224.2	| RNA-binding (RRM/RBD/RNP motifs) family protein | chr3:4254848-4256621 FORWARD LENGTH=358	S[+80]PYADGYDGFASSYNNGGR
AK364491	AT4G36020.1	CSDP1 | cold shock domain protein 1 | chr4:17043443-17044342 REVERSE LENGTH=299	AVDVTGPDGSFVQGGAGGGGGGGGGFGS[+80]R
MLOC_44066.1	AT3G46920.1	| Protein kinase superfamily protein with octicosapeptide/Phox/Bem1p domain | chr3:17280430-17284857 REVERSE LENGTH=	QQVPAAIPVS[+80]PANYIAEPR
AK250311.1	AT1G51200.4	| A20/AN1-like zinc finger family protein | chr1:18985690-18986211 FORWARD LENGTH=173	ALVVQPAADVAGTSEAVAVS[+80]PK
MLOC_60302.1	AT1G34220.2	| Regulator of Vps4 activity in the MVB pathway protein | chr1:12463102-12465911 REVERSE LENGTH=619	SDSIPLNS[+80]PPVKPTEQEFFTR
MLOC_39126.1	AT3G22500.1	ATECP31 | Seed maturation protein | chr3:7971920-7972865 REVERSE LENGTH=256	GGPAAVMQSAAT[+80]INAR
MLOC_58863.1	AT1G53720.1	ATCYP59, CYP59 | cyclophilin 59 | chr1:20057012-20059508 FORWARD LENGTH=506	HTYILDDPFDDPPQLAEFIPENS[+80]PLGKPHDEVAEER
MLOC_67581.1	AT2G32120.2	HSP70T-2 | heat-shock protein 70T-2 | chr2:13651720-13653411 REVERSE LENGTH=563	LMPEPTAVALLYAQQQQQLMHDNMGS[+80]GIEK
AK362998	AT3G01540.1	DRH1, ATDRH1 | DEAD box RNA helicase 1 | chr3:213077-216142 REVERSE LENGTH=618	RGS[+80]VDPSNDYQVEDGK
MLOC_7525.4	AT4G09510.1	CINV2 | cytosolic invertase 2 | chr4:6021312-6023310 REVERSE LENGTH=558	GGGGFDGMYS[+80]PGGGLR
MLOC_32718.4	AT3G58600.1	| Adaptin ear-binding coat-associated protein 1 NECAP-1 | chr3:21668746-21670999 REVERSE LENGTH=302	SAFFEQGLNKLS[+80]FNDK
MLOC_57581.1	AT3G60240.4	EIF4G, CUM2 | eukaryotic translation initiation factor 4G | chr3:22261842-22268295 FORWARD LENGTH=1727	GSAGPLVS[+80]PGPQQR
MLOC_17517.1	AT3G28500.1	| 60S acidic ribosomal protein family | chr3:10682204-10682551 FORWARD LENGTH=115	FAAVPSGGGAIAVGAPAAAAGGAAAPAAES[+80]K
AK374423	AT2G01710.1	| Chaperone DnaJ-domain superfamily protein | chr2:315836-316771 FORWARD LENGTH=311	VEVPAS[+80]PQPVMPTR
MLOC_67581.1	AT2G32120.2	HSP70T-2 | heat-shock protein 70T-2 | chr2:13651720-13653411 REVERSE LENGTH=563	LM[+16]PEPTAVALLYAQQQQQLMHDNMGS[+80]GIEK
MLOC_67581.1	AT2G32120.2	HSP70T-2 | heat-shock protein 70T-2 | chr2:13651720-13653411 REVERSE LENGTH=563	LMPEPTAVALLYAQQQQQLM[+16]HDNM[+16]GS[+80]GIEK
MLOC_39126.1	AT3G22500.1	ATECP31 | Seed maturation protein | chr3:7971920-7972865 REVERSE LENGTH=256	GGPAAVM[+16]QSAAT[+80]INAR
MLOC_5598.2	AT1G15340.1	MBD10 | methyl-CPG-binding domain 10 | chr1:5275895-5277474 REVERSE LENGTH=384	ENEKPAEFEEVPVEFEMSDLVS[+80]ENK
AK249237.1	AT1G80210.1	BRCC36A, AtBRCC36A | Mov34/MPN/PAD-1 family protein | chr1:30163357-30165628 REVERSE LENGTH=406	AM[+16]PGGTTSGIIS[+80]PR
MLOC_4008.2	AT2G16485.1	| nucleic acid binding;zinc ion binding;DNA binding | chr2:7137269-7145222 REVERSE LENGTH=1773	NTWSSTQLES[+80]PHGR
AK358219	AT1G05500.1	SYTE, ATSYTE, NTMC2TYPE2.1, NTMC2T2.1, SYT5 | Calcium-dependent lipid-binding (CaLB domain) family protein | chr1:162	QEGVSNPFAS[+80]QIQLTSLEK
MLOC_55832.1	AT4G21160.4	ZAC | Calcium-dependent ARF-type GTPase activating protein family | chr4:11284694-11286532 FORWARD LENGTH=337	AGFESTNS[+80]LNSVDNSFSSTSR
AK375664	AT2G40170.1	ATEM6, GEA6, EM6 | Stress induced protein | chr2:16779792-16780167 REVERSE LENGTH=92	AREGETVVPGGTGGKS[+80]LEAQQNLAEGR
MLOC_13086.1	AT2G21580.1	| Ribosomal protein S25 family protein | chr2:9236629-9237510 FORWARD LENGTH=108	MVS[+80]IHSSQQIFTR
AK360256	AT3G23340.1	ckl10 | casein kinase I-like 10 | chr3:8351047-8353791 FORWARD LENGTH=442	VSGAAGPS[+80]IDKIEK
AK374501	-	-	DGGSSFSFQHAPGGFVALERT[+80]PK
MLOC_68482.4	AT1G24190.1	SIN3, ATSIN3, SNL3 | SIN3-like 3 | chr1:8563858-8569927 REVERSE LENGTH=1330	DLLEEFQHFLPDTSVS[+80]PQAGTAPR
AK368609	AT1G09760.1	U2A' | U2 small nuclear ribonucleoprotein A | chr1:3159476-3161603 REVERSE LENGTH=249	ALSTGQVPAEFALPKPDTNM[+16]AEAS[+80]EEAEAEK
MLOC_43627.4	AT3G07810.1	| RNA-binding (RRM/RBD/RNP motifs) family protein | chr3:2492875-2495052 FORWARD LENGTH=494	LGS[+80]PIGYVGLNDDSGSILSSMGR
MLOC_64351.2	AT1G64110.3	| P-loop containing nucleoside triphosphate hydrolases superfamily protein | chr1:23796887-23801255 REVERSE LENGTH=8	NAS[+80]TSSDMSSLASQGTPSNS[+80]APLRR
AK371016	AT4G38710.1	| glycine-rich protein | chr4:18078141-18080002 REVERSE LENGTH=452	M[+16]GGFGGDS[+80]FSSR
MLOC_17197.3	AT1G09430.1	ACLA-3 | ATP-citrate lyase A-3 | chr1:3042135-3044978 FORWARD LENGTH=424	VLS[+80]PSESYIHELDEK
MLOC_79938.1	-	-	VAPTPEQVAPSPEQVS[+80]PLPR
MLOC_65534.7	AT5G18070.1	DRT101 | phosphoglucosamine mutase-related | chr5:5981117-5982787 FORWARD LENGTH=556	LGGAAVGLVITAS[+80]HNPVGDNGVK
MLOC_56006.1	AT5G16880.2	| Target of Myb protein 1 | chr5:5549658-5551274 FORWARD LENGTH=407	EPIVAEPEPEPAM[+16]IPVTVEPEES[+80]PRAVGK
MLOC_67834.1	AT2G42280.1	| basic helix-loop-helix (bHLH) DNA-binding superfamily protein | chr2:17611428-17613163 REVERSE LENGTH=359	DSSEPAQNGLAHQFS[+80]LPK
AK248873.1	-	-	EDSHATEIYDDHQS[+80]NSADVPNLDR
AK368865	AT5G57870.1	eIFiso4G1 | MIF4G domain-containing protein / MA3 domain-containing protein | chr5:23439755-23443433 FORWARD LENGTH=7	SALLGTGGPPSRPSTLTASPT[+80]PLAAQT[+80]TLSPKPSSATPASVPVPDK
MLOC_74303.1	AT5G03280.1	EIN2, PIR2, CKR1, ERA3, ORE3, ORE2, ATEIN2 | NRAMP metal ion transporter family protein | chr5:788589-793066 FORWARD	APSYPDGPPS[+80]LTFSR
MLOC_59292.1	AT2G36640.1	ATECP63, ECP63 | embryonic cell protein 63 | chr2:15357019-15358552 REVERSE LENGTH=448	LNEYGSYAS[+80]QK
AK369564	AT4G39680.2	| SAP domain-containing protein | chr4:18414604-18416938 REVERSE LENGTH=633	EAPFQQGQANQSVPC[+57]QAAAT[+80]PR
MLOC_4350.2	AT5G51660.1	CPSF160, ATCPSF160 | cleavage and polyadenylation specificity factor 160 | chr5:20980250-20989268 FORWARD LENGTH=1442	DNSFS[+80]PAGSVDLASASDSR
AK368609	AT1G09760.1	U2A' | U2 small nuclear ribonucleoprotein A | chr1:3159476-3161603 REVERSE LENGTH=249	ALSTGQVPAEFALPKPDTNMAEAS[+80]EEAEAEK
MLOC_67834.1	AT2G42280.1	| basic helix-loop-helix (bHLH) DNA-binding superfamily protein | chr2:17611428-17613163 REVERSE LENGTH=359	GQLS[+80]FSSR
AK372616	AT1G43700.1	VIP1, SUE3 | VIRE2-interacting protein 1 | chr1:16484352-16486017 FORWARD LENGTH=341	SLS[+80]LDAAFFEGLALQGGGGGHK
MLOC_73299.1	AT2G36460.1	| Aldolase superfamily protein | chr2:15296929-15298387 REVERSE LENGTH=358	GDATLGEGASES[+80]LHVK
AK361510	AT4G30890.3	UBP24 | ubiquitin-specific protease 24 | chr4:15036383-15038825 REVERSE LENGTH=551	NVKS[+80]EASVPSAGLASNLK
MLOC_77133.1	AT3G12490.1	ATCYSB, ATCYS6, CYSB | cystatin B | chr3:3960523-3961777 REVERSE LENGTH=201	HTGDATSFTIS[+80]DLGAK
MLOC_1248.1	AT5G56550.1	OXS3, ATOXS3 | oxidative stress 3 | chr5:22895847-22896502 REVERSE LENGTH=172	S[+80]YATLGVGGM[+16]AR
MLOC_67213.1	AT5G38710.1	| Methylenetetrahydrofolate reductase family protein | chr5:15501340-15503899 FORWARD LENGTH=476	SPAVAAS[+80]PVVQAAAR
AK369564	AT4G39680.2	| SAP domain-containing protein | chr4:18414604-18416938 REVERSE LENGTH=633	LKLEPPAPAATAAAVPIS[+80]PATTPR
MLOC_59292.1	AT2G36640.1	ATECP63, ECP63 | embryonic cell protein 63 | chr2:15357019-15358552 REVERSE LENGTH=448	S[+80]ATENIFGSAQGLTQVLK
AK371016	AT4G38710.1	| glycine-rich protein | chr4:18078141-18080002 REVERSE LENGTH=452	VQPVSLASFNS[+80]AK
AK364999	AT4G17890.1	AGD8 | ARF-GAP domain 8 | chr4:9937121-9939146 FORWARD LENGTH=413	SIS[+80]SSQFFGDQANLEK
MLOC_67581.1	AT2G32120.2	HSP70T-2 | heat-shock protein 70T-2 | chr2:13651720-13653411 REVERSE LENGTH=563	LMPEPTAVALLYAQQQQQLMHDNM[+16]GS[+80]GIEK
MLOC_54346.5	AT1G55860.2	UPL1 | ubiquitin-protein ligase 1 | chr1:20879900-20892910 REVERSE LENGTH=3681	STS[+80]IYNLLGR
MLOC_74303.1	AT5G03280.1	EIN2, PIR2, CKR1, ERA3, ORE3, ORE2, ATEIN2 | NRAMP metal ion transporter family protein | chr5:788589-793066 FORWARD	SALEHTESSDTTVESDPDSQQSTAYTAST[+80]PK
AK355323	AT2G40060.1	| Clathrin light chain protein | chr2:16726564-16728001 FORWARD LENGTH=258	HVS[+80]GGYAPSPFFPDSDFGGGDDDGPVLPPPAEM[+16]GR
MLOC_19482.1	AT3G15670.1	| Late embryogenesis abundant protein (LEA) family protein | chr3:5310141-5310901 REVERSE LENGTH=225	DKTGS[+80]VLGQAGEQVK
MLOC_5484.1	AT2G41740.1	VLN2, ATVLN2 | villin 2 | chr2:17410962-17416878 REVERSE LENGTH=976	AAAVAALSSVLTAEQSGS[+80]SDNLR
MLOC_11348.2	AT4G00990.1	| Transcription factor jumonji (jmjC) domain-containing protein | chr4:427035-431535 FORWARD LENGTH=840	SAS[+80]PDNTDVTC[+57]EPTGHQTRPR
AK368865	AT5G57870.1	eIFiso4G1 | MIF4G domain-containing protein / MA3 domain-containing protein | chr5:23439755-23443433 FORWARD LENGTH=7	IPS[+80]SINKPSPINPR
AK248403.1	AT2G01190.1	| Octicosapeptide/Phox/Bem1p family protein | chr2:115023-117296 FORWARD LENGTH=720	GISTDSASVNC[+57]LLGLEDDNAS[+80]QHSR
MLOC_57175.1	AT3G45980.1	H2B, HTB9 | Histone superfamily protein | chr3:16897492-16897944 REVERSE LENGTH=150	KRPAQEDGEPMPEGPET[+80]PTQK
AK367694	AT3G13300.1	VCS | Transducin/WD40 repeat-like superfamily protein | chr3:4304085-4309949 FORWARD LENGTH=1344	IQDDSISS[+80]PR
MLOC_64351.2	AT1G64110.3	| P-loop containing nucleoside triphosphate hydrolases superfamily protein | chr1:23796887-23801255 REVERSE LENGTH=8	NAS[+80]TSSDM[+16]SSLASQGTPSNSAPLR
AK375601	AT1G19530.1	| unknown protein; FUNCTIONS IN: molecular_function unknown; INVOLVED IN: N-terminal protein myristoylation, anaerob	SSPPVMTTNSVDGHGEAAAS[+80]PSASR
MLOC_12181.1	AT3G20250.1	APUM5, PUM5 | pumilio 5 | chr3:7059098-7062660 REVERSE LENGTH=961	S[+80]GSAPPSMEGSLAALGNLIGQK
AK249633.1	AT3G19420.1	ATPEN2, PEN2 | PTEN 2 | chr3:6731824-6735354 FORWARD LENGTH=611	LSPKDPQQDETAEGSTT[+80]PTTAQAGVFGSLTR
MLOC_79155.1	AT1G17720.1	ATB BETA | Protein phosphatase 2A, regulatory subunit PR55 | chr1:6093949-6098065 REVERSE LENGTH=501	SLS[+80]SLTR
MLOC_70967.1	AT3G29360.2	| UDP-glucose 6-dehydrogenase family protein | chr3:11267375-11268817 REVERSE LENGTH=480	FDWDHPVHLQPMS[+80]PTTTK
MLOC_64351.2	AT1G64110.3	| P-loop containing nucleoside triphosphate hydrolases superfamily protein | chr1:23796887-23801255 REVERSE LENGTH=8	RNAS[+80]TSSDM[+16]SSLASQGTPSNSAPLRR
MLOC_4008.2	AT2G16485.1	| nucleic acid binding;zinc ion binding;DNA binding | chr2:7137269-7145222 REVERSE LENGTH=1773	TPHGPSVISSQTLTANLM[+16]S[+80]PTPASQSTVNESEK
MLOC_50941.3	AT1G15330.1	| Cystathionine beta-synthase (CBS) protein | chr1:5274368-5275499 FORWARD LENGTH=352	ALVPLESS[+80]ADNVVAVELVESAPVYR
MLOC_72442.1	AT3G15670.1	| Late embryogenesis abundant protein (LEA) family protein | chr3:5310141-5310901 REVERSE LENGTH=225	DAVANTLGM[+16]GGDNTS[+80]ATK
MLOC_12181.1	AT3G20250.1	APUM5, PUM5 | pumilio 5 | chr3:7059098-7062660 REVERSE LENGTH=961	SGS[+80]APPSMEGSLAALGNLIGQK
AK368865	AT5G57870.1	eIFiso4G1 | MIF4G domain-containing protein / MA3 domain-containing protein | chr5:23439755-23443433 FORWARD LENGTH=7	SALLGTGGPPSRPSTLTASPTPLAAQTTLS[+80]PKPSSATPASVPVPDK
AK360971	-	-	S[+80]M[+16]EPNTIAITNVAPTFGNDVNLLPEGDYINR
AK370824	AT5G47810.1	PFK2 | phosphofructokinase 2 | chr5:19356569-19357989 REVERSE LENGTH=444	LPAS[+80]PSGATTIPNPISSHPYFHPPPTFYISPGDVSLR
MLOC_74793.3	-	-	AQQVMPSAGTAT[+80]PGIGAQDGATTR
MLOC_17792.1	AT1G25260.1	| Ribosomal protein L10 family protein | chr1:8854163-8855766 REVERSE LENGTH=235	EGLAHLGGEEDDESS[+80]
AK358014	AT1G30970.1	SUF4 | zinc finger (C2H2 type) family protein | chr1:11040613-11043593 REVERSE LENGTH=367	RVSDLTFTTST[+80]P
MLOC_74793.3	-	-	KLAS[+80]TVYEK
AK368865	AT5G57870.1	eIFiso4G1 | MIF4G domain-containing protein / MA3 domain-containing protein | chr5:23439755-23443433 FORWARD LENGTH=7	IPSS[+80]INKPSPINPR
AK248403.1	AT2G01190.1	| Octicosapeptide/Phox/Bem1p family protein | chr2:115023-117296 FORWARD LENGTH=720	NSS[+80]FGSTSSAPSLSNLPPIR
MLOC_544.3	AT1G74910.2	| ADP-glucose pyrophosphorylase family protein | chr1:28135770-28138456 REVERSE LENGTH=415	RVSS[+80]FEALQSAMK
MLOC_10042.2	AT5G50840.1	| CONTAINS InterPro DOMAIN/s: Taxilin (InterPro:IPR019132); Has 30201 Blast hits to 17322 proteins in 780 species: A	AGGEETLAAPST[+80]PADAADALR
MLOC_67581.1	AT2G32120.2	HSP70T-2 | heat-shock protein 70T-2 | chr2:13651720-13653411 REVERSE LENGTH=563	LMPEPTAVALLY[+80]AQQQQQLM[+16]HDNM[+16]GSGIEK
MLOC_10727.2	AT2G45460.3	| SMAD/FHA domain-containing protein | chr2:18737054-18741690 REVERSE LENGTH=916	DGGQPLFNDEQQS[+80]PTLK
MLOC_3013.1	AT4G33950.1	OST1, SNRK2-6, SRK2E, SNRK2.6, P44, ATOST1 | Protein kinase superfamily protein | chr4:16272364-16274657 FORWARD LENG	ST[+80]VGTPAYIAPEVLIK
MLOC_56258.2	AT4G19180.1	| GDA1/CD39 nucleoside phosphatase family protein | chr4:10485518-10487868 REVERSE LENGTH=740	LSSS[+80]LIDLPTFSR
MLOC_70601.1	AT2G33690.1	| Late embryogenesis abundant protein, group 6 | chr2:14252199-14252414 FORWARD LENGTH=71	AGDSVQLPTET[+80]SPYVQYNK
MLOC_60302.1	AT1G34220.2	| Regulator of Vps4 activity in the MVB pathway protein | chr1:12463102-12465911 REVERSE LENGTH=619	STS[+80]LEDDPFSYPNLFSSKP
AK375601	AT1G19530.1	| unknown protein; FUNCTIONS IN: molecular_function unknown; INVOLVED IN: N-terminal protein myristoylation, anaerob	SSPPVM[+16]TTNSVDGHGEAAAS[+80]PSASR
AK364391	AT5G28900.1	| Calcium-binding EF-hand family protein | chr5:10925852-10929892 FORWARD LENGTH=536	AGATLNVAGSSASTNAASSSSLPSMFPAGSAPPLS[+80]PR
AK356539	AT4G01400.2	| FUNCTIONS IN: molecular_function unknown; INVOLVED IN: biological_process unknown; LOCATED IN: cellular_component	SPRPDS[+80]AAAADVSADAAPSLDFGDPASLAALR
MLOC_57276.1	AT1G66240.1	ATX1, ATATX1 | homolog of anti-oxidant 1 | chr1:24686445-24687327 REVERSE LENGTH=106	TSFWEAEPSAASAVSS[+80]
AK374192	AT1G11360.4	| Adenine nucleotide alpha hydrolases-like superfamily protein | chr1:3822171-3822899 REVERSE LENGTH=242	APT[+80]PRPPPPASLQPDSPGVFFTNAAAAAPLGSAHR
MLOC_61230.2	AT1G06410.1	ATTPS7, TPS7, ATTPSA | trehalose-phosphatase/synthase 7 | chr1:1955413-1958153 FORWARD LENGTH=851	S[+80]YTNLLDLANGNLSALDYGGSGGGGGGRPPRPR
AK353887	AT5G60460.1	| Preprotein translocase Sec, Sec61-beta subunit protein | chr5:24317590-24317919 REVERSE LENGTH=109	TSS[+80]SASGGGGFSSGGGNNMLR
AK358193	AT1G76850.1	SEC5A | exocyst complex component sec5 | chr1:28848013-28854282 FORWARD LENGTH=1090	TSAYSSYQAPAPAAHHPPAQVS[+80]SPSFR
AK368609	AT1G09760.1	U2A' | U2 small nuclear ribonucleoprotein A | chr1:3159476-3161603 REVERSE LENGTH=249	ALSTGQVPAEFALPKPDT[+80]NM[+16]AEASEEAEAEK
AK368050	AT4G33650.1	ADL2, DRP3A | dynamin-related protein 3A | chr4:16161073-16166587 FORWARD LENGTH=808	SAAEAERPGS[+80]SGSGSTSFWGSIFTSSEDR
AK353887	AT5G60460.1	| Preprotein translocase Sec, Sec61-beta subunit protein | chr5:24317590-24317919 REVERSE LENGTH=109	TSSSAS[+80]GGGGFSSGGGNNM[+16]LR
MLOC_80437.2	AT3G22490.1	| Seed maturation protein | chr3:7969785-7970738 REVERSE LENGTH=262	AT[+80]GSNLTVPGGVAAAVQAAADQNERAAR
MLOC_61507.1	AT5G27540.2	MIRO1 | MIRO-related GTP-ase 1 | chr5:9722816-9727112 FORWARD LENGTH=648	LPADYFPDRVPITIVDTS[+80]SSPEQKPK
MLOC_67136.1	AT3G01560.1	| Protein of unknown function (DUF1421) | chr3:219884-221707 FORWARD LENGTH=511	QILGLAASGAASS[+80]PPSGGGGGGGQLFDLMGPNPQEDDVVESHGLHAR
AK373112	AT1G48410.1	AGO1 | Stabilizer of iron transporter SufD / Polynucleotidyl transferase | chr1:17886285-17891892 REVERSE LENGTH=1048	TVPELHQAPDVQYQAPVVSPSASGAGSSS[+80]QPVAEVSSGQVEQQFQK
MLOC_55862.2	AT3G45630.1	| RNA binding (RRM/RBD/RNP motifs) family protein | chr3:16748751-16753190 REVERSE LENGTH=989	VAS[+80]PSNDIWNSSVATDKPHATANTSHISLWNDK
MLOC_62083.1	-	-	MEEERVELLSSSMTT[+80]PTSSGK
AK355323	AT2G40060.1	| Clathrin light chain protein | chr2:16726564-16728001 FORWARD LENGTH=258	HVSGGY[+80]APSPFFPDSDFGGGDDDGPVLPPPAEM[+16]GR
MLOC_64351.2	AT1G64110.3	| P-loop containing nucleoside triphosphate hydrolases superfamily protein | chr1:23796887-23801255 REVERSE LENGTH=8	NASTSSDMSSLASQGT[+80]PSNSAPLRR
MLOC_61699.1	AT4G19040.1	EDR2 | ENHANCED DISEASE RESISTANCE 2 | chr4:10431799-10437171 REVERSE LENGTH=718	RTT[+80]IGNGPPEYLHDWTR
AK251984.1	AT4G32180.1	ATPANK2, PANK2 | pantothenate kinase 2 | chr4:15537724-15543715 REVERSE LENGTH=901	SGS[+80]RPQLDLSGAAIHGTLEDR
AK248873.1	-	-	EDSHATEIYDDHQSNS[+80]ADVPNLDR
MLOC_61155.2	AT3G26850.2	| histone-lysine N-methyltransferases | chr3:9896541-9897415 REVERSE LENGTH=265	LSVVNSS[+80]PAAAADC[+57]SGDNNNTANVTK
AK376722	AT5G57610.1	| Protein kinase superfamily protein with octicosapeptide/Phox/Bem1p domain | chr5:23325307-23329099 FORWARD LENGTH=	SPSS[+80]PVSVEQLFGIGGNESGIPDIAGLR
AK357176	AT4G15930.1	| Dynein light chain type 1 family protein | chr4:9036344-9037825 FORWARD LENGTH=123	LAASATAALGS[+80]PPPAAAS[+80]PTAHK
AK368865	AT5G57870.1	eIFiso4G1 | MIF4G domain-containing protein / MA3 domain-containing protein | chr5:23439755-23443433 FORWARD LENGTH=7	NAPGGPLS[+80]PGGFSVNRPGTGGM[+16]M[+16]PGMPGAR
MLOC_7019.5	AT4G35785.1	| RNA-binding (RRM/RBD/RNP motifs) family protein | chr4:16953211-16955127 REVERSE LENGTH=238	TPT[+80]PGSYLGHR
AK251924.1	AT4G11560.1	| bromo-adjacent homology (BAH) domain-containing protein | chr4:7000095-7003445 REVERSE LENGTH=587	DAISSLTVDT[+80]PSSGGNVGTAPWATAK
AK368865	AT5G57870.1	eIFiso4G1 | MIF4G domain-containing protein / MA3 domain-containing protein | chr5:23439755-23443433 FORWARD LENGTH=7	SALLGTGGPPSRPSTLTAS[+80]PT[+80]PLAAQTTLSPKPSSATPASVPVPDK
MLOC_5772.2	AT5G40370.1	| Glutaredoxin family protein | chr5:16147826-16149052 REVERSE LENGTH=111	LVALLTEAGAISGSTS[+80]K
AK363748	AT4G26750.1	| hydroxyproline-rich glycoprotein family protein | chr4:13475848-13478382 REVERSE LENGTH=421	FNDHVSAQAHFSPPPPPSEFSS[+80]PR
AK251984.1	AT4G32180.1	ATPANK2, PANK2 | pantothenate kinase 2 | chr4:15537724-15543715 REVERSE LENGTH=901	S[+80]GSRPQLDLSGAAIHGTLEDR
MLOC_59084.1	AT3G10360.1	APUM4, PUM4 | pumilio 4 | chr3:3211276-3215144 REVERSE LENGTH=1003	S[+80]NSRNAFESPNPVR
AK368865	AT5G57870.1	eIFiso4G1 | MIF4G domain-containing protein / MA3 domain-containing protein | chr5:23439755-23443433 FORWARD LENGTH=7	SALLGTGGPPSRPSTLTASPTPLAAQT[+80]TLSPKPSSATPASVPVPDK
AK374324	-	-	ERPEAAVSAESGDT[+80]ALAATRPR
MLOC_68317.1	AT5G06760.1	LEA4-5 | Late Embryogenesis Abundant 4-5 | chr5:2089754-2090313 REVERSE LENGTH=158	SRAGS[+80]SDDGYLPVTGAGHAVGEGGGHQLPAR
MLOC_59292.1	AT2G36640.1	ATECP63, ECP63 | embryonic cell protein 63 | chr2:15357019-15358552 REVERSE LENGTH=448	SAT[+80]ENIFGSAQGLTQVLK
AK368865	AT5G57870.1	eIFiso4G1 | MIF4G domain-containing protein / MA3 domain-containing protein | chr5:23439755-23443433 FORWARD LENGTH=7	SALLGTGGPPSRPSTLTASPTPLAAQT[+80]T[+80]LSPKPSSATPASVPVPDK
AK368609	AT1G09760.1	U2A' | U2 small nuclear ribonucleoprotein A | chr1:3159476-3161603 REVERSE LENGTH=249	ALSTGQVPAEFALPKPDT[+80]NMAEASEEAEAEK
MLOC_5287.1	AT5G15490.1	| UDP-glucose 6-dehydrogenase family protein | chr5:5027872-5029314 REVERSE LENGTH=480	FDWDHPMHLQPTS[+80]PTAVK
MLOC_81213.1	AT3G13300.1	VCS | Transducin/WD40 repeat-like superfamily protein | chr3:4304085-4309949 FORWARD LENGTH=1344	QGTEADTATHVSSPT[+80]PTSNM[+16]DNAGSYAEAVLR
MLOC_64351.2	AT1G64110.3	| P-loop containing nucleoside triphosphate hydrolases superfamily protein | chr1:23796887-23801255 REVERSE LENGTH=8	RNAS[+80]TSSDM[+16]SSLASQGTPSNSAPLR
AK369564	AT4G39680.2	| SAP domain-containing protein | chr4:18414604-18416938 REVERSE LENGTH=633	LKLEPPAPAATAAAVPIS[+80]PATT[+80]PR
AK357525	-	-	AMDGQDAAAPQPGAPPPHPS[+80]SPLTQQAMELEGK
AK362998	AT3G01540.1	DRH1, ATDRH1 | DEAD box RNA helicase 1 | chr3:213077-216142 REVERSE LENGTH=618	RAGSGST[+80]RPDSVLPVEK

## Sheet: down_FH
Table S2 List of responded phosphopeptides during imbibition. (3/4)
Quantitative data of phosphopeptides were derived from FH and AR grains treated with imbibition. This list shows phosphopeptides which were upregulated or downregulated in FH or AR grains with p-value less than 0.05 for at least one of the time points analyzed.
Acc No.	Ortholog	Description	Peptide(seq+mod)
MLOC_68734.1	AT1G09770.1	ATCDC5, CDC5, ATMYBCDC5 | cell division cycle 5 | chr1:3162002-3165122 FORWARD LENGTH=844	LRESQTPLLGGDNPELHPSDFSGVT[+80]PR
AK376172	AT3G01560.1	| Protein of unknown function (DUF1421) | chr3:219884-221707 FORWARD LENGTH=511	S[+80]ANGTATDVLPSYDFQPM[+16]R
AK372460	AT5G16610.1	| unknown protein; Has 30201 Blast hits to 17322 proteins in 780 species: Archae - 12; Bacteria - 1396; Metazoa - 17	TEPALDGYAIYPPES[+80]PSVK
MLOC_81213.1	AT3G13300.1	VCS | Transducin/WD40 repeat-like superfamily protein | chr3:4304085-4309949 FORWARD LENGTH=1344	QGTEADT[+80]ATHVSSPTPTSNMDNAGSYAEAVLR
MLOC_12549.2	AT2G41620.1	| Nucleoporin interacting component (Nup93/Nic96-like) family protein | chr2:17350419-17354997 REVERSE LENGTH=861	HALMPSSASS[+80]PQASSGLPAEEVMPIPNK
AK252415.1	AT5G54440.1	CLUB, AtTRS130 | CLUB | chr5:22100056-22107695 FORWARD LENGTH=1259	AFLS[+80]VGNLAELYDSVDGSGFGPHSK
AK364955	AT5G13420.1	| Aldolase-type TIM barrel family protein | chr5:4302080-4304212 REVERSE LENGTH=438	TIDANVS[+80]EAEGIYSALEK
AK248370.1	AT5G15870.1	| glycosyl hydrolase family 81 protein | chr5:5182641-5184878 REVERSE LENGTH=745	RPAPPS[+80]PAGHVFPQAASTVLPDPAR
MLOC_7079.1	AT4G14960.2	TUA6 | Tubulin/FtsZ family protein | chr4:8548769-8550319 REVERSE LENGTH=450	TIQFVDWC[+57]PT[+80]GFK
AK358522	AT2G33830.1	| Dormancy/auxin associated family protein | chr2:14309768-14310286 REVERSE LENGTH=106	GLGANLFDRPQPNS[+80]PTVYDWLYSDETR
AK354341	AT3G63460.1	| transducin family protein / WD-40 repeat family protein | chr3:23431009-23437241 REVERSE LENGTH=1104	STPVDSQPS[+80]PAPLPVPHQTVK
MLOC_79165.2	AT3G22490.1	| Seed maturation protein | chr3:7969785-7970738 REVERSE LENGTH=262	TAEESVQGVQVPQAS[+80]GGGFSAAVAMETAAAYNQAVGAVRPGQASDAATK
MLOC_64351.2	AT1G64110.3	| P-loop containing nucleoside triphosphate hydrolases superfamily protein | chr1:23796887-23801255 REVERSE LENGTH=8	M[+16]SGLLQSFTMT[+80]PQK
AK368865	AT5G57870.1	eIFiso4G1 | MIF4G domain-containing protein / MA3 domain-containing protein | chr5:23439755-23443433 FORWARD LENGTH=7	LFAPAFAVAASGSGDFLRPHGGGAS[+80]GVSR
MLOC_1248.1	AT5G56550.1	OXS3, ATOXS3 | oxidative stress 3 | chr5:22895847-22896502 REVERSE LENGTH=172	MNS[+80]DSIYDMSGMTAHLPAK
MLOC_55003.1	AT1G19870.1	iqd32 | IQ-domain 32 | chr1:6895400-6898539 REVERSE LENGTH=794	AAALSPKLS[+80]PDVQDNNPRK
AK370769	AT4G35780.1	| ACT-like protein tyrosine kinase family protein | chr4:16946729-16950405 REVERSE LENGTH=570	VQSGVMT[+80]AETGTYR
AK364999	AT4G17890.1	AGD8 | ARF-GAP domain 8 | chr4:9937121-9939146 FORWARD LENGTH=413	S[+80]ISSSQFFGDQANLEK
MLOC_38604.1	AT1G79340.1	AtMC4, MC4 | metacaspase 4 | chr1:29842849-29844368 FORWARD LENGTH=418	FHEGGS[+80]GDQGGVM[+16]GMVGALAHEFLK
MLOC_66641.1	AT1G76390.2	| ARM repeat superfamily protein | chr1:28655914-28658531 FORWARD LENGTH=811	LPNFS[+80]GIFSK
MLOC_37523.1	AT2G46020.2	CHR2, ATBRM, BRM, CHA2 | transcription regulatory protein SNF2, putative | chr2:18923304-18931769 FORWARD LENGTH=2193	DQSLDS[+80]PGLPLHPGDLFIVK
AK374932	AT3G26400.1	EIF4B1 | eukaryotic translation initiation factor 4B1 | chr3:9666616-9669081 FORWARD LENGTH=532	KPLPSRYPSLGTGGGFRES[+80]PGGGFR
AK373280	AT4G39220.1	ATRER1A | Rer1 family protein | chr4:18264280-18265531 FORWARD LENGTH=191	RAAS[+80]ADDLTLPKD
MLOC_56775.1	AT2G25620.1	AtDBP1, DBP1 | DNA-binding protein phosphatase 1 | chr2:10903154-10904978 REVERSE LENGTH=392	SIS[+80]AEGLHSLR
MLOC_66641.1	AT1G76390.2	| ARM repeat superfamily protein | chr1:28655914-28658531 FORWARD LENGTH=811	HVDKLPNFS[+80]GIFSK
AK248403.1	AT2G01190.1	| Octicosapeptide/Phox/Bem1p family protein | chr2:115023-117296 FORWARD LENGTH=720	LFLFPAKPESSSS[+80]LGSLLDDSSK
AK358869	AT5G40570.1	| Surfeit locus protein 2 (SURF2) | chr5:16246798-16248251 FORWARD LENGTH=204	ATAAAASDSGASS[+80]PQGSVEGGGEK
MLOC_57766.1	AT5G42950.1	| GYF domain-containing protein | chr5:17224436-17231044 FORWARD LENGTH=1714	TET[+80]PSYVVPQR
MLOC_10051.2	AT4G14350.2	| AGC (cAMP-dependent, cGMP-dependent and protein kinase C) kinase family protein | chr4:8256449-8259934 REVERSE LEN	M[+16]LAYS[+80]TVGTPDYIAPEVLLK
AK365864	AT3G21430.2	ATALY3, ALY3 | DNA binding | chr3:7544800-7552841 REVERSE LENGTH=1132	DASYFLNNEGSAS[+80]GK
MLOC_57175.1	AT3G45980.1	H2B, HTB9 | Histone superfamily protein | chr3:16897492-16897944 REVERSE LENGTH=150	SKT[+80]PASLQSQETQEEPYAYQDETTK
AK369330	AT2G38280.2	FAC1, ATAMPD | AMP deaminase, putative / myoadenylate deaminase, putative | chr2:16033767-16038793 REVERSE LENGTH=839	SHSIS[+80]NDLHAVQPDPVAADILR
MLOC_37645.1	AT3G02830.1	ZFN1 | zinc finger protein 1 | chr3:614075-615916 FORWARD LENGTH=397	RLLESPSGS[+80]AYAS
MLOC_5174.1	AT1G01470.1	LEA14, LSR3 | Late embryogenesis abundant protein | chr1:172295-172826 REVERSE LENGTH=151	GFVAETVS[+80]GVQKPEADLSDMSVQHVGR
MLOC_5725.1	AT1G29900.1	CARB | carbamoyl phosphate synthetase B | chr1:10468164-10471976 FORWARD LENGTH=1187	SESDALS[+80]IASEVGYPVVVRPSYVLGGR
MLOC_58756.5	AT4G30160.1	VLN4, ATVLN4 | villin 4 | chr4:14754528-14759511 FORWARD LENGTH=974	SSS[+80]PDPVKPPQR
AK369330	AT2G38280.2	FAC1, ATAMPD | AMP deaminase, putative / myoadenylate deaminase, putative | chr2:16033767-16038793 REVERSE LENGTH=839	SHS[+80]ISNDLHAVQPDPVAADILR
MLOC_74793.3	-	-	GAVTSLTGGNRVS[+80]ETVQPTTEGNIGGGVAAEGPVLHGEAPR
MLOC_57237.1	-	-	NLRPT[+80]RSLLLLLASTPLWPHK

## Sheet: down_AR
Table S2. List of responded phosphopeptides during imbibition. (4/4)
Quantitative data of phosphopeptides were derived from FH and AR grains treated with imbibition. This list shows phosphopeptides which were upregulated or downregulated in FH or AR grains with p-value less than 0.05 for at least one of the time points analyzed.
Acc No.	Ortholog	Description	Peptide(seq+mod)
MLOC_68734.1	AT1G09770.1	ATCDC5, CDC5, ATMYBCDC5 | cell division cycle 5 | chr1:3162002-3165122 FORWARD LENGTH=844	LRESQTPLLGGDNPELHPSDFSGVT[+80]PR
AK358203	-	-	M[+16]AT[+80]TAGT[+80]R
MLOC_59084.1	AT3G10360.1	APUM4, PUM4 | pumilio 4 | chr3:3211276-3215144 REVERSE LENGTH=1003	NAFES[+80]PNLSR
MLOC_72762.2	AT3G48050.2	| BAH domain ;TFIIS helical bundle-like domain | chr3:17734270-17739412 REVERSE LENGTH=1613	VQNSFS[+80]PLNALIEIK
AK370828	AT3G53670.2	| unknown protein; FUNCTIONS IN: molecular_function unknown; INVOLVED IN: biological_process unknown; LOCATED IN: ce	SVS[+80]LPSAVK
AK360808	AT3G29390.1	RIK | RS2-interacting KH protein | chr3:11289675-11294524 FORWARD LENGTH=578	TGLEDLGKMNS[+80]S[+80]LAAAAM[+16]K
MLOC_36539.1	AT5G26751.1	ATSK11, SK 11 | shaggy-related kinase 11 | chr5:9399582-9401839 REVERSE LENGTH=405	GEPNISY[+80]IC[+57]SR
MLOC_8914.1	-	-	KS[+80]GGSNRPS[+80]KGFVK
AK376429	AT1G21630.1	| Calcium-binding EF hand family protein | chr1:7581457-7587796 FORWARD LENGTH=1218	SLFDSSM[+16]PST[+80]PM[+16]QK
AK369461	AT3G50980.1	XERO1 | dehydrin xero 1 | chr3:18942034-18942721 FORWARD LENGTH=128	QVGYGATGTGTHDAGGYGGS[+80]GIAPR
AK364491	AT4G36020.1	CSDP1 | cold shock domain protein 1 | chr4:17043443-17044342 REVERSE LENGTH=299	GGDGS[+80]GGYGGGYGGGGGGGWGGQR
AK371508	AT1G04300.1	| TRAF-like superfamily protein | chr1:1148818-1153895 REVERSE LENGTH=1074	GNLADSEMSSVGS[+80]PGR
AK356696	AT2G46140.1	| Late embryogenesis abundant protein | chr2:18959163-18960362 FORWARD LENGTH=166	LPTLSDFFGGS[+80]AK
MLOC_51340.2	AT5G43830.1	| Aluminium induced protein with YGL and LRDR motifs | chr5:17622593-17624239 REVERSE LENGTH=251	AVPRVDS[+80]QGQMC[+57]GSTFK
AK367910	AT3G07790.1	| DGCR14-related | chr3:2487491-2489017 FORWARD LENGTH=508	T[+80]PNPFYIESGK
MLOC_52687.1	AT3G08590.2	| Phosphoglycerate mutase, 2,3-bisphosphoglycerate-independent | chr3:2608683-2611237 REVERSE LENGTH=560	AHGTAVGLPSDDDM[+16]GNS[+80]EVGHNALGAGR
AK374557	AT4G14770.1	TCX2, ATTCX2 | TESMIN/TSO1-like CXC 2 | chr4:8481522-8484825 REVERSE LENGTH=674	RFLYTGADLDHS[+80]EDEHDFIVER
AK354074	AT5G20490.2	XIK, ATXIK, XI-17 | Myosin family protein with Dil domain | chr5:6927064-6936079 REVERSE LENGTH=1465	ENS[+80]GFTFLHQR
MLOC_57766.1	AT5G42950.1	| GYF domain-containing protein | chr5:17224436-17231044 FORWARD LENGTH=1714	LGGRDDRPGS[+80]ADDLKGETAGSLR
AK250018.1	AT5G24630.5	BIN4 | double-stranded DNA binding | chr5:8432523-8435682 REVERSE LENGTH=446	LM[+16]LSSDSDAS[+80]PVNSPSR
AK248403.1	AT2G01190.1	| Octicosapeptide/Phox/Bem1p family protein | chr2:115023-117296 FORWARD LENGTH=720	HQHDVQSVPDS[+80]PMLDK
AK374932	AT3G26400.1	EIF4B1 | eukaryotic translation initiation factor 4B1 | chr3:9666616-9669081 FORWARD LENGTH=532	YPSLGTGGGFRES[+80]PGGGFR
MLOC_59585.1	AT1G17210.1	ATILP1, ILP1 | IAP-like protein 1 | chr1:5880502-5884657 REVERSE LENGTH=958	GQESNLQHSLS[+80]C[+57]NAR
AK369821	AT5G46840.1	| RNA-binding (RRM/RBD/RNP motifs) family protein | chr5:19005651-19007609 FORWARD LENGTH=501	ATHDVEAVAS[+80]GGEEDEAFDDEGK
AK251984.1	AT4G32180.1	ATPANK2, PANK2 | pantothenate kinase 2 | chr4:15537724-15543715 REVERSE LENGTH=901	GGVDS[+80]PSWR
AK376392	AT5G55860.1	| Plant protein of unknown function (DUF827) | chr5:22610146-22612166 FORWARD LENGTH=649	S[+80]PHADSDKTEIGEIDTR
MLOC_65838.1	AT5G48150.2	PAT1 | GRAS family transcription factor | chr5:19522497-19524053 REVERSE LENGTH=490	HDS[+80]PSSHSFTPPSIR
MLOC_6787.1	AT1G53540.1	| HSP20-like chaperones superfamily protein | chr1:19980510-19980983 FORWARD LENGTH=157	TSS[+80]DTAAFAGAR
MLOC_56084.1	AT3G60820.3	PBF1 | N-terminal nucleophile aminohydrolases (Ntn hydrolases) superfamily protein | chr3:22472038-22473809 REVERSE L	SPS[+80]PLLVPAR
MLOC_209.1	AT1G79090.2	| FUNCTIONS IN: molecular_function unknown; INVOLVED IN: biological_process unknown; LOCATED IN: cellular_component	M[+16]SS[+80]YPHQEPQYNNIELIR
MLOC_64351.2	AT1G64110.3	| P-loop containing nucleoside triphosphate hydrolases superfamily protein | chr1:23796887-23801255 REVERSE LENGTH=8	SIS[+80]ETTLEK
AK364155	AT2G43650.1	EMB2777 | Sas10/U3 ribonucleoprotein (Utp) family protein | chr2:18099430-18103147 FORWARD LENGTH=654	LADEAS[+80]PLESYTK
MLOC_55003.1	AT1G19870.1	iqd32 | IQ-domain 32 | chr1:6895400-6898539 REVERSE LENGTH=794	SNS[+80]SSFLDAPSKPK
MLOC_6787.1	AT1G53540.1	| HSP20-like chaperones superfamily protein | chr1:19980510-19980983 FORWARD LENGTH=157	TS[+80]SDTAAFAGAR
AK371760	AT2G32910.1	| DCD (Development and Cell Death) domain protein | chr2:13959685-13961989 FORWARD LENGTH=691	TPPRDY[+80]AAPLGELAAR
AK251764.1	AT1G08680.1	ZIGA4, AGD14 | ARF GAP-like zinc finger-containing protein ZIGA4 | chr1:2762820-2768387 FORWARD LENGTH=649	TASSGSFGSFDGSS[+80]PSNK
AK372371	AT4G33650.1	ADL2, DRP3A | dynamin-related protein 3A | chr4:16161073-16166587 FORWARD LENGTH=808	GYS[+80]LSEYGTGLPK
AK373421	AT4G39260.3	CCR1, ATGRP8, GR-RBP8, GRP8 | cold, circadian rhythm, and RNA binding 1 | chr4:18274166-18274958 REVERSE LENGTH=92	DGGGGYGGGGGGYGGS[+80]RGGSGGGNWRE
MLOC_12681.1	AT2G46240.1	BAG6, ATBAG6 | BCL-2-associated athanogene 6 | chr2:18986586-18989827 FORWARD LENGTH=1043	EEAVTTLVAGKEPDGT[+80]PTPR
AK249121.1	AT3G53500.2	RSZ32, RS2Z32, At-RS2Z | RNA-binding (RRM/RBD/RNP motifs) family protein with retrovirus zinc finger-like domain | ch	T[+80]RTRDLEDLFGR
MLOC_62137.1	AT5G46570.1	BSK2 | BR-signaling kinase 2 | chr5:18894687-18897198 FORWARD LENGTH=489	SYS[+80]TNLAYTPPEFLR
AK252415.1	AT5G54440.1	CLUB, AtTRS130 | CLUB | chr5:22100056-22107695 FORWARD LENGTH=1259	TM[+16]S[+80]GPATSETSLPVDRPMR
MLOC_70277.1	AT1G73460.1	| Protein kinase superfamily protein | chr1:27620122-27624899 FORWARD LENGTH=1169	HPWLSFPYEPIS[+80]S
AK355469	AT5G60460.1	| Preprotein translocase Sec, Sec61-beta subunit protein | chr5:24317590-24317919 REVERSE LENGTH=109	TSSS[+80]GAGGGGGFSGGNNM[+16]LR
AK376422	AT5G16780.1	DOT2, MDF | SART-1 family | chr5:5517784-5521566 REVERSE LENGTH=820	AHPGSLT[+80]PMLGDK
AK373849	AT2G36640.1	ATECP63, ECP63 | embryonic cell protein 63 | chr2:15357019-15358552 REVERSE LENGTH=448	ETNDSLAHKT[+80]SETAEATR
AK362959	AT3G66654.2	| Cyclophilin-like peptidyl-prolyl cis-trans isomerase family protein | chr3:2088694-2090297 FORWARD LENGTH=236	ASGENSLS[+80]PKHEAFMIGTTR
AK374525	AT4G38900.3	| Basic-leucine zipper (bZIP) transcription factor family protein | chr4:18139564-18141520 REVERSE LENGTH=547	SLS[+80]MDSFM[+16]GK
MLOC_12926.1	AT4G35785.1	| RNA-binding (RRM/RBD/RNP motifs) family protein | chr4:16953211-16955127 REVERSE LENGTH=238	AAS[+80]KSPPLPPPPPFPPK
AK371351	AT3G56850.1	AREB3, DPBF3 | ABA-responsive element binding protein 3 | chr3:21046554-21047894 REVERSE LENGTH=297	ALGM[+16]GGAPLVVQTAVKPVDSGS[+80]K
MLOC_81213.1	AT3G13300.1	VCS | Transducin/WD40 repeat-like superfamily protein | chr3:4304085-4309949 FORWARD LENGTH=1344	LNM[+16]S[+80]SEQTVEAISER
AK368842	AT1G18190.1	GC2 | golgin candidate 2 | chr1:6257963-6261325 REVERSE LENGTH=668	RSAS[+80]AAADLSAQDRPGAEPAVAVEAK
AK358521	AT4G17520.1	| Hyaluronan / mRNA binding family | chr4:9771496-9773313 FORWARD LENGTH=360	DLQAM[+16]QLLS[+80]TK
AK355067	AT2G33490.1	| hydroxyproline-rich glycoprotein family protein | chr2:14183552-14187666 FORWARD LENGTH=623	QRPVS[+80]QSAPLFPEK
MLOC_53862.2	AT3G04910.1	WNK1, ZIK4, ATWNK1 | with no lysine (K) kinase 1 | chr3:1355084-1358057 FORWARD LENGTH=700	ALRT[+80]ESSPDC[+57]M[+16]FTAR
MLOC_44617.2	AT3G05060.1	| NOP56-like pre RNA processing ribonucleoprotein | chr3:1413174-1415564 REVERSE LENGTH=533	TYNPAADLVVGQTTEET[+80]PKK
AK374932	AT3G26400.1	EIF4B1 | eukaryotic translation initiation factor 4B1 | chr3:9666616-9669081 FORWARD LENGTH=532	YPSLGT[+80]GGGFRESPGGGFR
MLOC_209.1	AT1G79090.2	| FUNCTIONS IN: molecular_function unknown; INVOLVED IN: biological_process unknown; LOCATED IN: cellular_component	MSSY[+80]PHQEPQYNNIELIR
MLOC_65838.1	AT5G48150.2	PAT1 | GRAS family transcription factor | chr5:19522497-19524053 REVERSE LENGTH=490	HDSPSS[+80]HSFTPPSIR
