# Supplementary material for: Comparative Phosphoproteomic Analysis of Barley Embryos with Different Dormancy during Imbibition
Source: Int J Mol Sci. 2019 Jan 21;20(2):451. doi: 10.3390/ijms20020451 (PMC6359383; doi:10.3390/ijms20020451)
Supplement: Supplementary file 1 [file ijms-20-00451-s001.zip › ijms-418799 sp for proof 1.18/Table S3.xlsx]

## Sheet: FH_up
Table S3. List of GO terms for phosphopeptides in barley grains. (1/4).
The GO terms were enriched for 98 phosphopeptides, which were upregulated or downregulated in FH or AR grains, using DAVID program
Category	Term	Count	%	PValue	Genes	List Total	Pop Hits	Pop Total	Fold Enrichment	Bonferroni	Benjamini	FDR
GOTERM_BP_DIRECT	GO:0009793~embryo development ending in seed dormancy	7	11.8644	0.000486112	AT3G22490, AT5G13200, AT3G51810, AT4G31160, AT3G15670, AT1G55540, AT3G53040	42	459	18499	6.71714	0.0530015	0.0530015	0.549664
GOTERM_BP_DIRECT	GO:0008380~RNA splicing	3	5.08475	0.0369912	AT3G61860, AT3G63400, AT5G42920	42	137	18499	9.64494	0.985325	0.878858	34.7717
GOTERM_BP_DIRECT	GO:0070413~trehalose metabolism in response to stress	2	3.38983	0.0455499	AT1G68020, AT1G06410	42	21	18499	41.9478	0.9946	0.824563	41.0496
GOTERM_BP_DIRECT	GO:0005992~trehalose biosynthetic process	2	3.38983	0.0539936	AT1G68020, AT1G06410	42	25	18499	35.2362	0.998004	0.788635	46.6984
GOTERM_BP_DIRECT	GO:0009737~response to abscisic acid	4	6.77966	0.0563788	AT3G22490, AT3G51810, AT2G40170, AT1G19870	42	394	18499	4.4716	0.998496	0.727436	48.2021
GOTERM_BP_DIRECT	GO:0006397~mRNA processing	3	5.08475	0.0579542	AT3G13300, AT5G58040, AT5G42920	42	176	18499	7.50771	0.998752	0.671897	49.174

## Sheet: AR_up
Table S3. List of GO terms for phosphopeptides in barley grains. (2/4).
The GO terms were enriched for 215 phosphopeptides, which were upregulated or downregulated in FH or AR grains, using DAVID program
Category	Term	Count	%	PValue	Genes	List Total	Pop Hits	Pop Total	Fold Enrichment	Bonferroni	Benjamini	FDR
GOTERM_BP_DIRECT	GO:0006970~response to osmotic stress	9	8.49057	1.28349e-07	AT3G22490, AT2G35300, AT3G20250, AT3G19420, AT1G43700, AT4G33950, AT5G03280, AT5G38710, AT5G06760	90	122	18499	15.1631	2.97764e-05	2.97764e-05	0.000164776
GOTERM_BP_DIRECT	GO:0009793~embryo development ending in seed dormancy	9	8.49057	0.00164928	AT3G22490, AT2G36640, AT1G48410, AT5G27540, AT2G35300, AT4G31160, AT3G15670, AT3G22500, AT5G06760	90	459	18499	4.03028	0.318152	0.174259	2.09682
GOTERM_BP_DIRECT	GO:0009414~response to water deprivation	7	6.60377	0.00227695	AT3G22490, AT2G35300, AT3G12490, AT4G33950, AT4G36020, AT5G38710, AT5G06760	90	279	18499	5.15703	0.410721	0.161621	2.88411
GOTERM_BP_DIRECT	GO:0006417~regulation of translation	4	3.77358	0.00525167	AT1G48410, AT5G57870, AT3G10360, AT3G60240	90	73	18499	11.2627	0.705241	0.263171	6.53651
GOTERM_BP_DIRECT	GO:0009791~post-embryonic development	3	2.83019	0.0109693	AT3G42170, AT3G13300, AT4G33650	90	33	18499	18.6859	0.922613	0.400576	13.2034
GOTERM_BP_DIRECT	GO:0009790~embryo development	2	1.88679	0.0143647	AT2G35300, AT5G06760	90	3	18499	137.03	0.965152	0.428483	16.9521
GOTERM_BP_DIRECT	GO:0052546~cell wall pectin metabolic process	2	1.88679	0.0191074	AT5G15490, AT3G29360	90	4	18499	102.772	0.988619	0.472392	21.9388
GOTERM_BP_DIRECT	GO:0006065~UDP-glucuronate biosynthetic process	2	1.88679	0.0238276	AT5G15490, AT3G29360	90	5	18499	82.2178	0.996283	0.503099	26.6263
GOTERM_BP_DIRECT	GO:0009651~response to salt stress	7	6.60377	0.0292388	AT3G20250, AT3G19420, AT2G36460, AT5G07350, AT4G33950, AT5G03280, AT4G36020	90	484	18499	2.97275	0.998977	0.534642	31.6801
GOTERM_BP_DIRECT	GO:0006024~glycosaminoglycan biosynthetic process	2	1.88679	0.0378537	AT5G15490, AT3G29360	90	8	18499	51.3861	0.999871	0.591498	39.0678
GOTERM_BP_DIRECT	GO:0048316~seed development	3	2.83019	0.0424802	AT2G40170, AT2G35300, AT5G06760	90	68	18499	9.06814	0.999958	0.599697	42.7241
GOTERM_BP_DIRECT	GO:0006397~mRNA processing	4	3.77358	0.0531003	AT2G02570, AT3G13300, AT1G24706, AT5G07350	90	176	18499	4.67146	0.999997	0.651762	50.3651
GOTERM_BP_DIRECT	GO:1900150~regulation of defense response to fungus	2	1.88679	0.0607891	AT4G19040, AT2G28290	90	13	18499	31.6222	1	0.673468	55.2978
GOTERM_BP_DIRECT	GO:0006886~intracellular protein transport	4	3.77358	0.0662345	AT5G60460, AT2G40060, AT5G16880, AT4G21160	90	193	18499	4.25999	1	0.678783	58.5133
GOTERM_BP_DIRECT	GO:0006402~mRNA catabolic process	2	1.88679	0.07429	AT3G13300, AT5G07350	90	16	18499	25.6931	1	0.696974	62.8806
GOTERM_BP_DIRECT	GO:0015031~protein transport	5	4.71698	0.0808673	AT5G60460, AT1G34220, AT4G01400, AT4G26750, AT5G05010	90	339	18499	3.03163	1	0.705569	66.1277
GOTERM_BP_DIRECT	GO:0006413~translational initiation	3	2.83019	0.085166	AT5G57870, AT3G60240, AT4G38710	90	101	18499	6.10528	1	0.703219	68.1061

## Sheet: FH_down
Table S3. List of GO terms for phosphopeptides in barley grains. (3/4).
The GO terms were enriched for 33 phosphopeptides, which were upregulated or downregulated in FH or AR grains, using DAVID program
Category	Term	Count	%	PValue	Genes	List Total	Pop Hits	Pop Total	Fold Enrichment	Bonferroni	Benjamini	FDR
GOTERM_BP_DIRECT	GO:0009737~response to abscisic acid	5	14.7059	0.0027683	AT3G22490, AT4G30160, AT1G19870, AT5G42950, AT2G38280	29	394	18499	8.09513	0.207735	0.207735	2.93173

## Sheet: AR_down
Table S3. List of GO terms for phosphopeptides in barley grains. (4/4).
The GO terms were enriched for 75 phosphopeptides, which were upregulated or downregulated in FH or AR grains, using DAVID program
Category	Term	Count	%	PValue	Genes	List Total	Pop Hits	Pop Total	Fold Enrichment	Bonferroni	Benjamini	FDR
GOTERM_BP_DIRECT	GO:0009791~post-embryonic development	3	5.76923	0.00230712	AT5G20490, AT3G13300, AT4G33650	41	33	18499	41.0177	0.236808	0.236808	2.60479
GOTERM_BP_DIRECT	GO:0009737~response to abscisic acid	5	9.61538	0.0101181	AT4G39260, AT1G19870, AT3G50980, AT5G42950, AT3G56850	41	394	18499	5.72583	0.695731	0.448394	10.9707
GOTERM_BP_DIRECT	GO:0009933~meristem structural organization	2	3.84615	0.0382311	AT5G26751, AT5G16780	41	18	18499	50.1328	0.989546	0.781346	35.9448
GOTERM_BP_DIRECT	GO:0010090~trichome morphogenesis	2	3.84615	0.0710152	AT5G20490, AT5G24630	41	34	18499	26.5409	0.999819	0.884055	56.9032
GOTERM_BP_DIRECT	GO:0009817~defense response to fungus, incompatible interaction	2	3.84615	0.0909492	AT3G60820, AT2G46240	41	44	18499	20.5089	0.999986	0.89261	66.3643
