# Supplementary material for: Comparative Phosphoproteomic Analysis of Barley Embryos with Different Dormancy during Imbibition
Source: Int J Mol Sci. 2019 Jan 21;20(2):451. doi: 10.3390/ijms20020451 (PMC6359383; doi:10.3390/ijms20020451)
Supplement: Supplementary file 1 [file ijms-20-00451-s001.zip › ijms-418799 sp for proof 1.18/Table S4.xlsx]

## Sheet: group 1
Table S4. Classification of phosphopeptides by motif groups. (1/2)
Phosphorylation motifs were analyzed for phosphopeptides in barley grains using Motif-x program. Each motif group was defined as follows: Group 1 , [-R/K-x-x-pS/pT-] and Group 2, [-pS/pT-P-].
Peptide(seq+mod)	Acc No.	Ortholog	Description	Motif group
SHS[+80]ISNDLHAVQPDPVAADILR	AK369330	AT2G38280.2	FAC1, ATAMPD | AMP deaminase, putative / myoadenylate deaminase, putative | chr2:16033767-16038793 REVERSE LENGTH=839	1
S[+80]ASSFIPLAVPK	AK248611.1	AT1G44780.1	| CONTAINS InterPro DOMAIN/s: Histone chaperone domain CHZ (InterPro:IPR019098); BEST Arabidopsis thaliana protein m	1
TLT[+80]TPGTLTDLDEER	MLOC_61230.2	AT1G06410.1	ATTPS7, TPS7, ATTPSA | trehalose-phosphatase/synthase 7 | chr1:1955413-1958153 FORWARD LENGTH=851	1
NAS[+80]NVSLADAAHVK	AK251409.1	AT4G26270.1	PFK3 | phosphofructokinase 3 | chr4:13301094-13304030 REVERSE LENGTH=489	1
SAS[+80]VGDWIVNAKPTSNSHHLK	MLOC_30711.1	AT4G10730.1	| Protein kinase superfamily protein | chr4:6609793-6614786 REVERSE LENGTH=711	1
VSS[+80]FEALQSAM[+16]K	MLOC_544.3	AT1G74910.2	| ADP-glucose pyrophosphorylase family protein | chr1:28135770-28138456 REVERSE LENGTH=415	1
SYS[+80]NLM[+16]ELAAGGDR	MLOC_11773.1	AT1G68020.2	ATTPS6, TPS6 | UDP-Glycosyltransferase / trehalose-phosphatase family protein | chr1:25497493-25500241 FORWARD LENGTH	1
LIQRFPS[+80]TK	MLOC_67498.3	AT1G55540.1	emb1011 | Nuclear pore complex protein | chr1:20734759-20743049 REVERSE LENGTH=1816	1
KAS[+80]IVPVLTGNR	MLOC_54389.1	AT3G63400.2	| Cyclophilin-like peptidyl-prolyl cis-trans isomerase family protein | chr3:23412449-23415435 FORWARD LENGTH=387	1
LSS[+80]IDAQLR	MLOC_10405.1	AT1G53310.3	ATPPC1, PEPC1, ATPEPC1, PPC1 | phosphoenolpyruvate carboxylase 1 | chr1:19884261-19888070 REVERSE LENGTH=967	1
RSGS[+80]M[+16]DGVNSPFEGESALSGGPLDYAK	AK372616	AT1G43700.1	VIP1, SUE3 | VIRE2-interacting protein 1 | chr1:16484352-16486017 FORWARD LENGTH=341	1
SRS[+80]DAAATAGAVVAK	AK376070	AT5G58000.1	| Reticulon family protein | chr5:23477416-23479496 FORWARD LENGTH=487	1
TGS[+80]LVEDEAHANER	MLOC_17849.1	AT5G52200.1	| phosphoprotein phosphatase inhibitors | chr5:21202818-21204719 REVERSE LENGTH=191	1
QSS[+80]FSGLFQDDSYQHDTNR	AK372197	AT2G29200.1	APUM1, PUM1 | pumilio 1 | chr2:12549483-12553185 REVERSE LENGTH=968	1
YSVEESRSPS[+80]GR	AK367694	AT3G13300.1	VCS | Transducin/WD40 repeat-like superfamily protein | chr3:4304085-4309949 FORWARD LENGTH=1344	1
SLS[+80]EAITGAVQER	MLOC_74793.3	-	-	1
GGS[+80]AGGGQSSLGYLFGDGEPAKPAAAPAAK	MLOC_11070.1	AT1G69230.2	SP1L2 | SPIRAL1-like2 | chr1:26026543-26027085 REVERSE LENGTH=110	1
T[+80]GSALQQAGETVVNAVVGAK	MLOC_77777.3	AT1G52690.2	| Late embryogenesis abundant protein (LEA) family protein | chr1:19619842-19620589 FORWARD LENGTH=169	1
STS[+80]LELNPNTR	AK366111	AT3G10770.1	| Single-stranded nucleic acid binding R3H protein | chr3:3372461-3374026 REVERSE LENGTH=333	1
DSS[+80]NAPLFGLK	MLOC_70666.2	AT3G15970.1	| NUP50 (Nucleoporin 50 kDa) protein | chr3:5408982-5410379 REVERSE LENGTH=465	1
NAS[+80]TSSDM[+16]SSLASQGTPSNSAPLRR	MLOC_64351.2	AT1G64110.3	| P-loop containing nucleoside triphosphate hydrolases superfamily protein | chr1:23796887-23801255 REVERSE LENGTH=8	1
LGS[+80]FTFR	MLOC_59068.1	AT3G48530.1	KING1 | SNF1-related protein kinase regulatory subunit gamma 1 | chr3:17987559-17989592 FORWARD LENGTH=424	1
S[+80]FIKPKPEEPSAPTLEK	AK251924.1	AT4G11560.1	| bromo-adjacent homology (BAH) domain-containing protein | chr4:7000095-7003445 REVERSE LENGTH=587	1
TGS[+80]ALQQAGETVVNAVVGAK	MLOC_77777.3	AT1G52690.2	| Late embryogenesis abundant protein (LEA) family protein | chr1:19619842-19620589 FORWARD LENGTH=169	1
VGS[+80]AADWSSQY	MLOC_5540.1	AT3G22850.1	| Aluminium induced protein with YGL and LRDR motifs | chr3:8089067-8090275 FORWARD LENGTH=248	1
FRGQS[+80]LPPPPPLPTSFVPQSVAANR	MLOC_10832.5	AT1G24706.1	THO2, AtTHO2 | THO2 | chr1:8742210-8755243 FORWARD LENGTH=1804	1
RDS[+80]FSAVQPGNVSSR	AK363748	AT4G26750.1	| hydroxyproline-rich glycoprotein family protein | chr4:13475848-13478382 REVERSE LENGTH=421	1
TSS[+80]NASSGM[+16]GVAPDIR	MLOC_58904.1	AT2G31200.1	ADF6, ATADF6 | actin depolymerizing factor 6 | chr2:13294171-13294948 FORWARD LENGTH=146	1
KLAS[+80]TVYEK	MLOC_74793.3	-	-	1
HVS[+80]GGYAPSPFFPDSDFGGGDDDGPVLPPPAEM[+16]GR	AK355323	AT2G40060.1	| Clathrin light chain protein | chr2:16726564-16728001 FORWARD LENGTH=258	1
STS[+80]LEDDPFSYPNLFSSKP	MLOC_60302.1	AT1G34220.2	| Regulator of Vps4 activity in the MVB pathway protein | chr1:12463102-12465911 REVERSE LENGTH=619	1
SGS[+80]APPSMEGSLAALGNLIGQK	MLOC_12181.1	AT3G20250.1	APUM5, PUM5 | pumilio 5 | chr3:7059098-7062660 REVERSE LENGTH=961	1
T[+80]GSVLGQAGEQVK	MLOC_19482.1	AT3G15670.1	| Late embryogenesis abundant protein (LEA) family protein | chr3:5310141-5310901 REVERSE LENGTH=225	1
SGS[+80]RPQLDLSGAAIHGTLEDR	AK251984.1	AT4G32180.1	ATPANK2, PANK2 | pantothenate kinase 2 | chr4:15537724-15543715 REVERSE LENGTH=901	1
SLS[+80]LDAAFFEGLALQGGGGGHK	AK372616	AT1G43700.1	VIP1, SUE3 | VIRE2-interacting protein 1 | chr1:16484352-16486017 FORWARD LENGTH=341	1
SIS[+80]SSQFFGDQANLEK	AK364999	AT4G17890.1	AGD8 | ARF-GAP domain 8 | chr4:9937121-9939146 FORWARD LENGTH=413	1
RTT[+80]IGNGPPEYLHDWTR	MLOC_61699.1	AT4G19040.1	EDR2 | ENHANCED DISEASE RESISTANCE 2 | chr4:10431799-10437171 REVERSE LENGTH=718	1
SPRPDS[+80]AAAADVSADAAPSLDFGDPASLAALR	AK356539	AT4G01400.2	| FUNCTIONS IN: molecular_function unknown; INVOLVED IN: biological_process unknown; LOCATED IN: cellular_component	1
STS[+80]IYNLLGR	MLOC_54346.5	AT1G55860.2	UPL1 | ubiquitin-protein ligase 1 | chr1:20879900-20892910 REVERSE LENGTH=3681	1
TSS[+80]SASGGGGFSSGGGNNMLR	AK353887	AT5G60460.1	| Preprotein translocase Sec, Sec61-beta subunit protein | chr5:24317590-24317919 REVERSE LENGTH=109	1
SLS[+80]SLTR	MLOC_79155.1	AT1G17720.1	ATB BETA | Protein phosphatase 2A, regulatory subunit PR55 | chr1:6093949-6098065 REVERSE LENGTH=501	1
IGS[+80]TDAIDVWANQHK	MLOC_62156.1	AT5G20280.1	ATSPS1F, SPS1F | sucrose phosphate synthase 1F | chr5:6844994-6849997 REVERSE LENGTH=1043	1
NAS[+80]TSSDMSSLASQGTPSNS[+80]APLRR	MLOC_64351.2	AT1G64110.3	| P-loop containing nucleoside triphosphate hydrolases superfamily protein | chr1:23796887-23801255 REVERSE LENGTH=8	1
NAS[+80]TSSDM[+16]SSLASQGTPSNSAPLR	MLOC_64351.2	AT1G64110.3	| P-loop containing nucleoside triphosphate hydrolases superfamily protein | chr1:23796887-23801255 REVERSE LENGTH=8	1
RNAS[+80]TSSDM[+16]SSLASQGTPSNSAPLR	MLOC_64351.2	AT1G64110.3	| P-loop containing nucleoside triphosphate hydrolases superfamily protein | chr1:23796887-23801255 REVERSE LENGTH=8	1
RNAS[+80]TSSDM[+16]SSLASQGTPSNSAPLRR	MLOC_64351.2	AT1G64110.3	| P-loop containing nucleoside triphosphate hydrolases superfamily protein | chr1:23796887-23801255 REVERSE LENGTH=8	1
VSS[+80]FEALQSAMK	MLOC_544.3	AT1G74910.2	| ADP-glucose pyrophosphorylase family protein | chr1:28135770-28138456 REVERSE LENGTH=415	1
RVSS[+80]FEALQSAMK	MLOC_544.3	AT1G74910.2	| ADP-glucose pyrophosphorylase family protein | chr1:28135770-28138456 REVERSE LENGTH=415	1
RGS[+80]VDPSNDYQVEDGK	AK362998	AT3G01540.1	DRH1, ATDRH1 | DEAD box RNA helicase 1 | chr3:213077-216142 REVERSE LENGTH=618	1
SYT[+80]NLLDLAEGNFAALGPAGGGAR	MLOC_81502.2	AT1G06410.1	ATTPS7, TPS7, ATTPSA | trehalose-phosphatase/synthase 7 | chr1:1955413-1958153 FORWARD LENGTH=851	1
NSS[+80]FGSTSSAPSLSNLPPIR	AK248403.1	AT2G01190.1	| Octicosapeptide/Phox/Bem1p family protein | chr2:115023-117296 FORWARD LENGTH=720	1
SYT[+80]NLLDLANGNLSALDYGGSGGGGGGRPPRPR	MLOC_61230.2	AT1G06410.1	ATTPS7, TPS7, ATTPSA | trehalose-phosphatase/synthase 7 | chr1:1955413-1958153 FORWARD LENGTH=851	1
IPS[+80]SINKPSPINPR	AK368865	AT5G57870.1	eIFiso4G1 | MIF4G domain-containing protein / MA3 domain-containing protein | chr5:23439755-23443433 FORWARD LENGTH=7	1
MVS[+80]IHSSQQIFTR	MLOC_13086.1	AT2G21580.1	| Ribosomal protein S25 family protein | chr2:9236629-9237510 FORWARD LENGTH=108	1
DKTGS[+80]VLGQAGEQVK	MLOC_19482.1	AT3G15670.1	| Late embryogenesis abundant protein (LEA) family protein | chr3:5310141-5310901 REVERSE LENGTH=225	1
TGS[+80]VLGQAGEQVK	MLOC_19482.1	AT3G15670.1	| Late embryogenesis abundant protein (LEA) family protein | chr3:5310141-5310901 REVERSE LENGTH=225	1
SAT[+80]ENIFGSAQGLTQVLK	MLOC_59292.1	AT2G36640.1	ATECP63, ECP63 | embryonic cell protein 63 | chr2:15357019-15358552 REVERSE LENGTH=448	1
S[+80]M[+16]EPNTIAITNVAPTFGNDVNLLPEGDYINR	AK360971	-	-	1
S[+80]ATENIFGSAQGLTQVLK	MLOC_59292.1	AT2G36640.1	ATECP63, ECP63 | embryonic cell protein 63 | chr2:15357019-15358552 REVERSE LENGTH=448	1
SAAEAERPGS[+80]SGSGSTSFWGSIFTSSEDR	AK368050	AT4G33650.1	ADL2, DRP3A | dynamin-related protein 3A | chr4:16161073-16166587 FORWARD LENGTH=808	1
SRAGS[+80]SDDGYLPVTGAGHAVGEGGGHQLPAR	MLOC_68317.1	AT5G06760.1	LEA4-5 | Late Embryogenesis Abundant 4-5 | chr5:2089754-2090313 REVERSE LENGTH=158	1
ALSTGQVPAEFALPKPDT[+80]NM[+16]AEASEEAEAEK	AK368609	AT1G09760.1	U2A' | U2 small nuclear ribonucleoprotein A | chr1:3159476-3161603 REVERSE LENGTH=249	1
ALSTGQVPAEFALPKPDT[+80]NMAEASEEAEAEK	AK368609	AT1G09760.1	U2A' | U2 small nuclear ribonucleoprotein A | chr1:3159476-3161603 REVERSE LENGTH=249	1
SIS[+80]AEGLHSLR	MLOC_56775.1	AT2G25620.1	AtDBP1, DBP1 | DNA-binding protein phosphatase 1 | chr2:10903154-10904978 REVERSE LENGTH=392	1
MNS[+80]DSIYDMSGMTAHLPAK	MLOC_1248.1	AT5G56550.1	OXS3, ATOXS3 | oxidative stress 3 | chr5:22895847-22896502 REVERSE LENGTH=172	1
RAAS[+80]ADDLTLPKD	AK373280	AT4G39220.1	ATRER1A | Rer1 family protein | chr4:18264280-18265531 FORWARD LENGTH=191	1
SVS[+80]LPSAVK	AK370828	AT3G53670.2	| unknown protein; FUNCTIONS IN: molecular_function unknown; INVOLVED IN: biological_process unknown; LOCATED IN: ce	1
SIS[+80]ETTLEK	MLOC_64351.2	AT1G64110.3	| P-loop containing nucleoside triphosphate hydrolases superfamily protein | chr1:23796887-23801255 REVERSE LENGTH=8	1
SLS[+80]MDSFM[+16]GK	AK374525	AT4G38900.3	| Basic-leucine zipper (bZIP) transcription factor family protein | chr4:18139564-18141520 REVERSE LENGTH=547	1
SYS[+80]TNLAYTPPEFLR	MLOC_62137.1	AT5G46570.1	BSK2 | BR-signaling kinase 2 | chr5:18894687-18897198 FORWARD LENGTH=489	1
LGGRDDRPGS[+80]ADDLKGETAGSLR	MLOC_57766.1	AT5G42950.1	| GYF domain-containing protein | chr5:17224436-17231044 FORWARD LENGTH=1714	1
AAS[+80]KSPPLPPPPPFPPK	MLOC_12926.1	AT4G35785.1	| RNA-binding (RRM/RBD/RNP motifs) family protein | chr4:16953211-16955127 REVERSE LENGTH=238	1
M[+16]SS[+80]YPHQEPQYNNIELIR	MLOC_209.1	AT1G79090.2	| FUNCTIONS IN: molecular_function unknown; INVOLVED IN: biological_process unknown; LOCATED IN: cellular_component	1
ENS[+80]GFTFLHQR	AK354074	AT5G20490.2	XIK, ATXIK, XI-17 | Myosin family protein with Dil domain | chr5:6927064-6936079 REVERSE LENGTH=1465	1
KS[+80]GGSNRPS[+80]KGFVK	MLOC_8914.1	-	-	1
TSS[+80]DTAAFAGAR	MLOC_6787.1	AT1G53540.1	| HSP20-like chaperones superfamily protein | chr1:19980510-19980983 FORWARD LENGTH=157	1
TM[+16]S[+80]GPATSETSLPVDRPMR	AK252415.1	AT5G54440.1	CLUB, AtTRS130 | CLUB | chr5:22100056-22107695 FORWARD LENGTH=1259	1
GYS[+80]LSEYGTGLPK	AK372371	AT4G33650.1	ADL2, DRP3A | dynamin-related protein 3A | chr4:16161073-16166587 FORWARD LENGTH=808	1
QRPVS[+80]QSAPLFPEK	AK355067	AT2G33490.1	| hydroxyproline-rich glycoprotein family protein | chr2:14183552-14187666 FORWARD LENGTH=623	1
TGLEDLGKMNS[+80]S[+80]LAAAAM[+16]K	AK360808	AT3G29390.1	RIK | RS2-interacting KH protein | chr3:11289675-11294524 FORWARD LENGTH=578	1
SNS[+80]SSFLDAPSKPK	MLOC_55003.1	AT1G19870.1	iqd32 | IQ-domain 32 | chr1:6895400-6898539 REVERSE LENGTH=794	1
AVPRVDS[+80]QGQMC[+57]GSTFK	MLOC_51340.2	AT5G43830.1	| Aluminium induced protein with YGL and LRDR motifs | chr5:17622593-17624239 REVERSE LENGTH=251	1
RSAS[+80]AAADLSAQDRPGAEPAVAVEAK	AK368842	AT1G18190.1	GC2 | golgin candidate 2 | chr1:6257963-6261325 REVERSE LENGTH=668	1
ASALAALSNAFNPSSKPKT[+80]PPPSR	MLOC_5484.1	AT2G41740.1	VLN2, ATVLN2 | villin 2 | chr2:17410962-17416878 REVERSE LENGTH=976	1,2
SRPSPDYGRPVS[+80]PQYGAYGR	AK250601.1	AT3G61860.1	ATRSP31, RSP31, At-RS31, RS31 | RNA-binding (RRM/RBD/RNP motifs) family protein | chr3:22900311-22902159 REVERSE LENG	1,2
SAS[+80]PDNTDVTC[+57]EPTGHQTRPR	MLOC_11348.2	AT4G00990.1	| Transcription factor jumonji (jmjC) domain-containing protein | chr4:427035-431535 FORWARD LENGTH=840	1,2
VAS[+80]PSNDIWNSSVATDKPHATANTSHISLWNDK	MLOC_55862.2	AT3G45630.1	| RNA binding (RRM/RBD/RNP motifs) family protein | chr3:16748751-16753190 REVERSE LENGTH=989	1,2
APT[+80]PRPPPPASLQPDSPGVFFTNAAAAAPLGSAHR	AK374192	AT1G11360.4	| Adenine nucleotide alpha hydrolases-like superfamily protein | chr1:3822171-3822899 REVERSE LENGTH=242	1,2
VLS[+80]PSESYIHELDEK	MLOC_17197.3	AT1G09430.1	ACLA-3 | ATP-citrate lyase A-3 | chr1:3042135-3044978 FORWARD LENGTH=424	1,2
LGS[+80]PIGYVGLNDDSGSILSSMGR	MLOC_43627.4	AT3G07810.1	| RNA-binding (RRM/RBD/RNP motifs) family protein | chr3:2492875-2495052 FORWARD LENGTH=494	1,2
TPT[+80]PGSYLGHR	MLOC_7019.5	AT4G35785.1	| RNA-binding (RRM/RBD/RNP motifs) family protein | chr4:16953211-16955127 REVERSE LENGTH=238	1,2
SSS[+80]PDPVKPPQR	MLOC_58756.5	AT4G30160.1	VLN4, ATVLN4 | villin 4 | chr4:14754528-14759511 FORWARD LENGTH=974	1,2
SKT[+80]PASLQSQETQEEPYAYQDETTK	MLOC_57175.1	AT3G45980.1	H2B, HTB9 | Histone superfamily protein | chr3:16897492-16897944 REVERSE LENGTH=150	1,2
TET[+80]PSYVVPQR	MLOC_57766.1	AT5G42950.1	| GYF domain-containing protein | chr5:17224436-17231044 FORWARD LENGTH=1714	1,2
SPS[+80]PLLVPAR	MLOC_56084.1	AT3G60820.3	PBF1 | N-terminal nucleophile aminohydrolases (Ntn hydrolases) superfamily protein | chr3:22472038-22473809 REVERSE L	1,2
HDS[+80]PSSHSFTPPSIR	MLOC_65838.1	AT5G48150.2	PAT1 | GRAS family transcription factor | chr5:19522497-19524053 REVERSE LENGTH=490	1,2

## Sheet: group 2
Table S4. Classification of phosphopeptides by motif groups. (2/2)
Phosphorylation motifs were analyzed for phosphopeptides in barley grains using Motif-x program. Each motif group was defined as follows: Group 1 , [-R/K-x-x-pS/pT-] and Group 2, [-pS/pT-P-].
Peptide(seq+mod)	Acc No.	Ortholog	Description	Motif group
RPAPPS[+80]PAGHVFPQAASTVLPDPAR	AK248370.1	AT5G15870.1	| glycosyl hydrolase family 81 protein | chr5:5182641-5184878 REVERSE LENGTH=745	2
GLGANLFDRPQPNS[+80]PTVYDWLYSDETR	AK358522	AT2G33830.1	| Dormancy/auxin associated family protein | chr2:14309768-14310286 REVERSE LENGTH=106	2
EDASSHISGTDLAPTT[+80]P	MLOC_57730.3	AT4G26760.1	MAP65-2 | microtubule-associated protein 65-2 | chr4:13478834-13481300 REVERSE LENGTH=578	2
YEDLKEPIVAEPEPEPAM[+16]IPVTVEPEES[+80]PRAVGK	MLOC_56006.1	AT5G16880.2	| Target of Myb protein 1 | chr5:5549658-5551274 FORWARD LENGTH=407	2
DQTAVSPLEVPS[+80]PK	MLOC_25886.1	AT3G14890.1	| phosphoesterase | chr3:5008751-5013060 FORWARD LENGTH=694	2
RSGSM[+16]DGVNS[+80]PFEGESALSGGPLDYAK	AK372616	AT1G43700.1	VIP1, SUE3 | VIRE2-interacting protein 1 | chr1:16484352-16486017 FORWARD LENGTH=341	2
NASLSGIPS[+80]PGVQQPGGNISGSR	MLOC_11260.1	AT5G59710.1	VIP2, AtVIP2 | VIRE2 interacting protein 2 | chr5:24058157-24061736 FORWARD LENGTH=614	2
ASASGAAPDS[+80]PVPEPMVEA	AK362649	AT1G22920.1	CSN5A, JAB1, AJH1 | COP9 signalosome 5A | chr1:8109882-8111895 REVERSE LENGTH=357	2
DM[+16]LTSDVHGRS[+80]PPNYK	MLOC_38489.2	AT5G58040.1	ATFIP1[V], FIPS5, ATFIPS5, FIP1[V] | homolog of yeast FIP1 [V] | chr5:23488865-23494000 FORWARD LENGTH=1196	2
TALLSC[+57]DAVSS[+80]PSVGK	MLOC_37423.1	AT3G59580.2	| Plant regulator RWP-RK family protein | chr3:22009652-22012721 FORWARD LENGTH=894	2
S[+80]PTPLDLAAASAYHHR	AK374525	AT4G38900.3	| Basic-leucine zipper (bZIP) transcription factor family protein | chr4:18139564-18141520 REVERSE LENGTH=547	2
YAAPQPGTGAT[+80]PPSSSPLTQQAM[+16]DGK	AK357525	-	-	2
KLEAGRPPSLPAS[+80]PALEATK	AK353750	-	-	2
RSAEDM[+16]PPRDSES[+80]PAPVFHGEDDTVQGK	AK375506	AT1G65090.3	| unknown protein; FUNCTIONS IN: molecular_function unknown; INVOLVED IN: biological_process unknown; LOCATED IN: ce	2
LPPPPPSPVS[+80]PTDSGVAM[+16]SPFK	MLOC_32718.4	AT3G58600.1	| Adaptin ear-binding coat-associated protein 1 NECAP-1 | chr3:21668746-21670999 REVERSE LENGTH=302	2
M[+16]SGLLQSFTM[+16]T[+80]PQK	MLOC_64351.2	AT1G64110.3	| P-loop containing nucleoside triphosphate hydrolases superfamily protein | chr1:23796887-23801255 REVERSE LENGTH=8	2
SADLGTEVGS[+80]PTGPAVR	AK252395.1	AT3G60600.1	VAP27-1, VAP, (AT)VAP, VAP27 | vesicle associated protein | chr3:22400537-22402408 FORWARD LENGTH=256	2
IEIGGS[+80]PVSAAGDEK	MLOC_60439.1	AT3G21290.1	| dentin sialophosphoprotein-related | chr3:7482318-7488676 FORWARD LENGTH=1192	2
EC[+57]PYSVGGRPGRYS[+80]PPSR	AK371874	AT5G04280.1	| RNA-binding (RRM/RBD/RNP motifs) family protein with retrovirus zinc finger-like domain | chr5:1192461-1195413 FOR	2
NEPEPEIIRS[+80]PKAPTHSFK	AK364999	AT4G17890.1	AGD8 | ARF-GAP domain 8 | chr4:9937121-9939146 FORWARD LENGTH=413	2
RSLDSFEDLGTKS[+80]PTGR	MLOC_36880.3	AT3G09670.2	| Tudor/PWWP/MBT superfamily protein | chr3:2966637-2968817 FORWARD LENGTH=726	2
TPYHPM[+16]M[+16]DEDGSLS[+80]PTRPFDK	MLOC_79392.2	AT5G52200.2	| phosphoprotein phosphatase inhibitors | chr5:21202818-21204017 REVERSE LENGTH=211	2
AGDSVQLPTETS[+80]PYVQYNK	MLOC_70601.1	AT2G33690.1	| Late embryogenesis abundant protein, group 6 | chr2:14252199-14252414 FORWARD LENGTH=71	2
RVSDLTFTTST[+80]P	AK358014	AT1G30970.1	SUF4 | zinc finger (C2H2 type) family protein | chr1:11040613-11043593 REVERSE LENGTH=367	2
DNSFS[+80]PAGSVDLASASDSR	MLOC_4350.2	AT5G51660.1	CPSF160, ATCPSF160 | cleavage and polyadenylation specificity factor 160 | chr5:20980250-20989268 FORWARD LENGTH=1442	2
FDWDHPVHLQPMS[+80]PTTTK	MLOC_70967.1	AT3G29360.2	| UDP-glucose 6-dehydrogenase family protein | chr3:11267375-11268817 REVERSE LENGTH=480	2
EPIVAEPEPEPAM[+16]IPVTVEPEES[+80]PRAVGK	MLOC_56006.1	AT5G16880.2	| Target of Myb protein 1 | chr5:5549658-5551274 FORWARD LENGTH=407	2
AM[+16]PGGTTSGIIS[+80]PR	AK249237.1	AT1G80210.1	BRCC36A, AtBRCC36A | Mov34/MPN/PAD-1 family protein | chr1:30163357-30165628 REVERSE LENGTH=406	2
SALLGTGGPPSRPSTLTASPT[+80]PLAAQT[+80]TLSPKPSSATPASVPVPDK	AK368865	AT5G57870.1	eIFiso4G1 | MIF4G domain-containing protein / MA3 domain-containing protein | chr5:23439755-23443433 FORWARD LENGTH=7	2
SALLGTGGPPSRPSTLTAS[+80]PT[+80]PLAAQTTLSPKPSSATPASVPVPDK	AK368865	AT5G57870.1	eIFiso4G1 | MIF4G domain-containing protein / MA3 domain-containing protein | chr5:23439755-23443433 FORWARD LENGTH=7	2
AGGEETLAAPST[+80]PADAADALR	MLOC_10042.2	AT5G50840.1	| CONTAINS InterPro DOMAIN/s: Taxilin (InterPro:IPR019132); Has 30201 Blast hits to 17322 proteins in 780 species: A	2
QGTEADTATHVSSPT[+80]PTSNM[+16]DNAGSYAEAVLR	MLOC_81213.1	AT3G13300.1	VCS | Transducin/WD40 repeat-like superfamily protein | chr3:4304085-4309949 FORWARD LENGTH=1344	2
SALEHTESSDTTVESDPDSQQSTAYTAST[+80]PK	MLOC_74303.1	AT5G03280.1	EIN2, PIR2, CKR1, ERA3, ORE3, ORE2, ATEIN2 | NRAMP metal ion transporter family protein | chr5:788589-793066 FORWARD	2
LSPKDPQQDETAEGSTT[+80]PTTAQAGVFGSLTR	AK249633.1	AT3G19420.1	ATPEN2, PEN2 | PTEN 2 | chr3:6731824-6735354 FORWARD LENGTH=611	2
GSWPGVGS[+80]PVNDVLASLR	MLOC_63525.2	AT2G19810.1	| CCCH-type zinc finger family protein | chr2:8550419-8551498 FORWARD LENGTH=359	2
NTWSSTQLES[+80]PHGR	MLOC_4008.2	AT2G16485.1	| nucleic acid binding;zinc ion binding;DNA binding | chr2:7137269-7145222 REVERSE LENGTH=1773	2
DAISSLTVDT[+80]PSSGGNVGTAPWATAK	AK251924.1	AT4G11560.1	| bromo-adjacent homology (BAH) domain-containing protein | chr4:7000095-7003445 REVERSE LENGTH=587	2
SPAVAAS[+80]PVVQAAAR	MLOC_67213.1	AT5G38710.1	| Methylenetetrahydrofolate reductase family protein | chr5:15501340-15503899 FORWARD LENGTH=476	2
NASTSSDMSSLASQGT[+80]PSNSAPLRR	MLOC_64351.2	AT1G64110.3	| P-loop containing nucleoside triphosphate hydrolases superfamily protein | chr1:23796887-23801255 REVERSE LENGTH=8	2
ALVVQPAADVAGTSEAVAVS[+80]PK	AK250311.1	AT1G51200.4	| A20/AN1-like zinc finger family protein | chr1:18985690-18986211 FORWARD LENGTH=173	2
GSAGPLVS[+80]PGPQQR	MLOC_57581.1	AT3G60240.4	EIF4G, CUM2 | eukaryotic translation initiation factor 4G | chr3:22261842-22268295 FORWARD LENGTH=1727	2
VEVPAS[+80]PQPVMPTR	AK374423	AT2G01710.1	| Chaperone DnaJ-domain superfamily protein | chr2:315836-316771 FORWARD LENGTH=311	2
SQEIAS[+80]PAPSGPQQSYFQGDK	MLOC_11310.6	AT2G28290.1	SYD, CHR3 | P-loop containing nucleoside triphosphate hydrolases superfamily protein | chr2:12056771-12072950 FORWARD	2
NDVGLS[+80]PPNYSAGVQSEALDDLSQSHEK	AK367340	AT2G02570.4	| nucleic acid binding;RNA binding | chr2:698361-700794 REVERSE LENGTH=300	2
IQDDSISS[+80]PR	AK367694	AT3G13300.1	VCS | Transducin/WD40 repeat-like superfamily protein | chr3:4304085-4309949 FORWARD LENGTH=1344	2
SALLGTGGPPSRPSTLTAS[+80]PT[+80]PLAAQTTLSPKPSSATPASVPVPDK	AK368865	AT5G57870.1	eIFiso4G1 | MIF4G domain-containing protein / MA3 domain-containing protein | chr5:23439755-23443433 FORWARD LENGTH=7	2
VAPTPEQVAPSPEQVS[+80]PLPR	MLOC_79938.1	-	-	2
AQQVMPSAGTAT[+80]PGIGAQDGATTR	MLOC_74793.3	-	-	2
FNDHVSAQAHFSPPPPPSEFSS[+80]PR	AK363748	AT4G26750.1	| hydroxyproline-rich glycoprotein family protein | chr4:13475848-13478382 REVERSE LENGTH=421	2
LAASATAALGS[+80]PPPAAAS[+80]PTAHK	AK357176	AT4G15930.1	| Dynein light chain type 1 family protein | chr4:9036344-9037825 FORWARD LENGTH=123	2
LKLEPPAPAATAAAVPIS[+80]PATT[+80]PR	AK369564	AT4G39680.2	| SAP domain-containing protein | chr4:18414604-18416938 REVERSE LENGTH=633	2
EAPFQQGQANQSVPC[+57]QAAAT[+80]PR	AK369564	AT4G39680.2	| SAP domain-containing protein | chr4:18414604-18416938 REVERSE LENGTH=633	2
QQVPAAIPVS[+80]PANYIAEPR	MLOC_44066.1	AT3G46920.1	| Protein kinase superfamily protein with octicosapeptide/Phox/Bem1p domain | chr3:17280430-17284857 REVERSE LENGTH=	2
IALDTSISNNEDALS[+80]PDLPK	MLOC_6831.3	AT3G18380.1	| sequence-specific DNA binding transcription factors;sequence-specific DNA binding | chr3:6311002-6313181 REVERSE L	2
KRPAQEDGEPMPEGPET[+80]PTQK	MLOC_57175.1	AT3G45980.1	H2B, HTB9 | Histone superfamily protein | chr3:16897492-16897944 REVERSE LENGTH=150	2
FDWDHPMHLQPTS[+80]PTAVK	MLOC_5287.1	AT5G15490.1	| UDP-glucose 6-dehydrogenase family protein | chr5:5027872-5029314 REVERSE LENGTH=480	2
TPHGPSVISSQTLTANLM[+16]S[+80]PTPASQSTVNESEK	MLOC_4008.2	AT2G16485.1	| nucleic acid binding;zinc ion binding;DNA binding | chr2:7137269-7145222 REVERSE LENGTH=1773	2
LSVVNSS[+80]PAAAADC[+57]SGDNNNTANVTK	MLOC_61155.2	AT3G26850.2	| histone-lysine N-methyltransferases | chr3:9896541-9897415 REVERSE LENGTH=265	2
GLSVAVDS[+80]PTAAFHPGR	MLOC_61272.1	AT4G31160.1	DCAF1 | DDB1-CUL4 associated factor 1 | chr4:15145936-15152939 FORWARD LENGTH=1883	2
MEEERVELLSSSMTT[+80]PTSSGK	MLOC_62083.1	-	-	2
DLLEEFQHFLPDTSVS[+80]PQAGTAPR	MLOC_68482.4	AT1G24190.1	SIN3, ATSIN3, SNL3 | SIN3-like 3 | chr1:8563858-8569927 REVERSE LENGTH=1330	2
EVLSQAADGVLDTNPTS[+80]PLVGTNGNVHPAPR	MLOC_10832.5	AT1G24706.1	THO2, AtTHO2 | THO2 | chr1:8742210-8755243 FORWARD LENGTH=1804	2
SSPPVMTTNSVDGHGEAAAS[+80]PSASR	AK375601	AT1G19530.1	| unknown protein; FUNCTIONS IN: molecular_function unknown; INVOLVED IN: N-terminal protein myristoylation, anaerob	2
SSPPVM[+16]TTNSVDGHGEAAAS[+80]PSASR	AK375601	AT1G19530.1	| unknown protein; FUNCTIONS IN: molecular_function unknown; INVOLVED IN: N-terminal protein myristoylation, anaerob	2
AGATLNVAGSSASTNAASSSSLPSMFPAGSAPPLS[+80]PR	AK364391	AT5G28900.1	| Calcium-binding EF-hand family protein | chr5:10925852-10929892 FORWARD LENGTH=536	2
LHTYVLPTPNDVQATSQTIAGNPTSGS[+80]PIESK	AK355067	AT2G33490.1	| hydroxyproline-rich glycoprotein family protein | chr2:14183552-14187666 FORWARD LENGTH=623	2
GGGGFDGMYS[+80]PGGGLR	MLOC_7525.4	AT4G09510.1	CINV2 | cytosolic invertase 2 | chr4:6021312-6023310 REVERSE LENGTH=558	2
DGGSSFSFQHAPGGFVALERT[+80]PK	AK374501	-	-	2
DGGQPLFNDEQQS[+80]PTLK	MLOC_10727.2	AT2G45460.3	| SMAD/FHA domain-containing protein | chr2:18737054-18741690 REVERSE LENGTH=916	2
HTYILDDPFDDPPQLAEFIPENS[+80]PLGKPHDEVAEER	MLOC_58863.1	AT1G53720.1	ATCYP59, CYP59 | cyclophilin 59 | chr1:20057012-20059508 FORWARD LENGTH=506	2
S[+80]PYADGYDGFASSYNNGGR	MLOC_7217.1	AT3G13224.2	| RNA-binding (RRM/RBD/RNP motifs) family protein | chr3:4254848-4256621 FORWARD LENGTH=358	2
SDSIPLNS[+80]PPVKPTEQEFFTR	MLOC_60302.1	AT1G34220.2	| Regulator of Vps4 activity in the MVB pathway protein | chr1:12463102-12465911 REVERSE LENGTH=619	2
SPSS[+80]PVSVEQLFGIGGNESGIPDIAGLR	AK376722	AT5G57610.1	| Protein kinase superfamily protein with octicosapeptide/Phox/Bem1p domain | chr5:23325307-23329099 FORWARD LENGTH=	2
LAASATAALGS[+80]PPPAAAS[+80]PTAHK	AK357176	AT4G15930.1	| Dynein light chain type 1 family protein | chr4:9036344-9037825 FORWARD LENGTH=123	2
QILGLAASGAASS[+80]PPSGGGGGGGQLFDLMGPNPQEDDVVESHGLHAR	MLOC_67136.1	AT3G01560.1	| Protein of unknown function (DUF1421) | chr3:219884-221707 FORWARD LENGTH=511	2
DYVAQPLPLT[+80]PAYVEQGK	MLOC_75540.1	AT3G42170.1	| BED zinc finger ;hAT family dimerisation domain | chr3:14321838-14323928 FORWARD LENGTH=696	2
LPAS[+80]PSGATTIPNPISSHPYFHPPPTFYISPGDVSLR	AK370824	AT5G47810.1	PFK2 | phosphofructokinase 2 | chr5:19356569-19357989 REVERSE LENGTH=444	2
NAPGGPLS[+80]PGGFSVNRPGTGGM[+16]M[+16]PGMPGAR	AK368865	AT5G57870.1	eIFiso4G1 | MIF4G domain-containing protein / MA3 domain-containing protein | chr5:23439755-23443433 FORWARD LENGTH=7	2
S[+80]PRPDSAAAADVSADAAPSLDFGDPASLAALR	AK356539	AT4G01400.2	| FUNCTIONS IN: molecular_function unknown; INVOLVED IN: biological_process unknown; LOCATED IN: cellular_component	2
SALLGTGGPPSRPSTLTASPTPLAAQTTLS[+80]PKPSSATPASVPVPDK	AK368865	AT5G57870.1	eIFiso4G1 | MIF4G domain-containing protein / MA3 domain-containing protein | chr5:23439755-23443433 FORWARD LENGTH=7	2
LGDLGGPVVEDPAAPNSRT[+80]PMPR	MLOC_74793.3	-	-	2
LKLEPPAPAATAAAVPIS[+80]PATT[+80]PR	AK369564	AT4G39680.2	| SAP domain-containing protein | chr4:18414604-18416938 REVERSE LENGTH=633	2
LKLEPPAPAATAAAVPIS[+80]PATTPR	AK369564	AT4G39680.2	| SAP domain-containing protein | chr4:18414604-18416938 REVERSE LENGTH=633	2
ATAAAASDSGASS[+80]PQGSVEGGGEK	AK358869	AT5G40570.1	| Surfeit locus protein 2 (SURF2) | chr5:16246798-16248251 FORWARD LENGTH=204	2
DQSLDS[+80]PGLPLHPGDLFIVK	MLOC_37523.1	AT2G46020.2	CHR2, ATBRM, BRM, CHA2 | transcription regulatory protein SNF2, putative | chr2:18923304-18931769 FORWARD LENGTH=2193	2
STPVDSQPS[+80]PAPLPVPHQTVK	AK354341	AT3G63460.1	| transducin family protein / WD-40 repeat family protein | chr3:23431009-23437241 REVERSE LENGTH=1104	2
HALMPSSASS[+80]PQASSGLPAEEVMPIPNK	MLOC_12549.2	AT2G41620.1	| Nucleoporin interacting component (Nup93/Nic96-like) family protein | chr2:17350419-17354997 REVERSE LENGTH=861	2
M[+16]SGLLQSFTMT[+80]PQK	MLOC_64351.2	AT1G64110.3	| P-loop containing nucleoside triphosphate hydrolases superfamily protein | chr1:23796887-23801255 REVERSE LENGTH=8	2
KPLPSRYPSLGTGGGFRES[+80]PGGGFR	AK374932	AT3G26400.1	EIF4B1 | eukaryotic translation initiation factor 4B1 | chr3:9666616-9669081 FORWARD LENGTH=532	2
AAALSPKLS[+80]PDVQDNNPRK	MLOC_55003.1	AT1G19870.1	iqd32 | IQ-domain 32 | chr1:6895400-6898539 REVERSE LENGTH=794	2
TEPALDGYAIYPPES[+80]PSVK	AK372460	AT5G16610.1	| unknown protein; Has 30201 Blast hits to 17322 proteins in 780 species: Archae - 12; Bacteria - 1396; Metazoa - 17	2
S[+80]PHADSDKTEIGEIDTR	AK376392	AT5G55860.1	| Plant protein of unknown function (DUF827) | chr5:22610146-22612166 FORWARD LENGTH=649	2
HQHDVQSVPDS[+80]PMLDK	AK248403.1	AT2G01190.1	| Octicosapeptide/Phox/Bem1p family protein | chr2:115023-117296 FORWARD LENGTH=720	2
LM[+16]LSSDSDAS[+80]PVNSPSR	AK250018.1	AT5G24630.5	BIN4 | double-stranded DNA binding | chr5:8432523-8435682 REVERSE LENGTH=446	2
NAFES[+80]PNLSR	MLOC_59084.1	AT3G10360.1	APUM4, PUM4 | pumilio 4 | chr3:3211276-3215144 REVERSE LENGTH=1003	2
ASGENSLS[+80]PKHEAFMIGTTR	AK362959	AT3G66654.2	| Cyclophilin-like peptidyl-prolyl cis-trans isomerase family protein | chr3:2088694-2090297 FORWARD LENGTH=236	2
VQNSFS[+80]PLNALIEIK	MLOC_72762.2	AT3G48050.2	| BAH domain ;TFIIS helical bundle-like domain | chr3:17734270-17739412 REVERSE LENGTH=1613	2
T[+80]PNPFYIESGK	AK367910	AT3G07790.1	| DGCR14-related | chr3:2487491-2489017 FORWARD LENGTH=508	2
LADEAS[+80]PLESYTK	AK364155	AT2G43650.1	EMB2777 | Sas10/U3 ribonucleoprotein (Utp) family protein | chr2:18099430-18103147 FORWARD LENGTH=654	2
GGVDS[+80]PSWR	AK251984.1	AT4G32180.1	ATPANK2, PANK2 | pantothenate kinase 2 | chr4:15537724-15543715 REVERSE LENGTH=901	2
TASSGSFGSFDGSS[+80]PSNK	AK251764.1	AT1G08680.1	ZIGA4, AGD14 | ARF GAP-like zinc finger-containing protein ZIGA4 | chr1:2762820-2768387 FORWARD LENGTH=649	2
TYNPAADLVVGQTTEET[+80]PKK	MLOC_44617.2	AT3G05060.1	| NOP56-like pre RNA processing ribonucleoprotein | chr3:1413174-1415564 REVERSE LENGTH=533	2
EEAVTTLVAGKEPDGT[+80]PTPR	MLOC_12681.1	AT2G46240.1	BAG6, ATBAG6 | BCL-2-associated athanogene 6 | chr2:18986586-18989827 FORWARD LENGTH=1043	2
YPSLGTGGGFRES[+80]PGGGFR	AK374932	AT3G26400.1	EIF4B1 | eukaryotic translation initiation factor 4B1 | chr3:9666616-9669081 FORWARD LENGTH=532	2
GNLADSEMSSVGS[+80]PGR	AK371508	AT1G04300.1	| TRAF-like superfamily protein | chr1:1148818-1153895 REVERSE LENGTH=1074	2
SLFDSSM[+16]PST[+80]PM[+16]QK	AK376429	AT1G21630.1	| Calcium-binding EF hand family protein | chr1:7581457-7587796 FORWARD LENGTH=1218	2
AHPGSLT[+80]PMLGDK	AK376422	AT5G16780.1	DOT2, MDF | SART-1 family | chr5:5517784-5521566 REVERSE LENGTH=820	2
LRESQTPLLGGDNPELHPSDFSGVT[+80]PR	MLOC_68734.1	AT1G09770.1	ATCDC5, CDC5, ATMYBCDC5 | cell division cycle 5 | chr1:3162002-3165122 FORWARD LENGTH=844	2
ASALAALSNAFNPSSKPKT[+80]PPPSR	MLOC_5484.1	AT2G41740.1	VLN2, ATVLN2 | villin 2 | chr2:17410962-17416878 REVERSE LENGTH=976	1,2
SRPSPDYGRPVS[+80]PQYGAYGR	AK250601.1	AT3G61860.1	ATRSP31, RSP31, At-RS31, RS31 | RNA-binding (RRM/RBD/RNP motifs) family protein | chr3:22900311-22902159 REVERSE LENG	1,2
SAS[+80]PDNTDVTC[+57]EPTGHQTRPR	MLOC_11348.2	AT4G00990.1	| Transcription factor jumonji (jmjC) domain-containing protein | chr4:427035-431535 FORWARD LENGTH=840	1,2
VAS[+80]PSNDIWNSSVATDKPHATANTSHISLWNDK	MLOC_55862.2	AT3G45630.1	| RNA binding (RRM/RBD/RNP motifs) family protein | chr3:16748751-16753190 REVERSE LENGTH=989	1,2
APT[+80]PRPPPPASLQPDSPGVFFTNAAAAAPLGSAHR	AK374192	AT1G11360.4	| Adenine nucleotide alpha hydrolases-like superfamily protein | chr1:3822171-3822899 REVERSE LENGTH=242	1,2
VLS[+80]PSESYIHELDEK	MLOC_17197.3	AT1G09430.1	ACLA-3 | ATP-citrate lyase A-3 | chr1:3042135-3044978 FORWARD LENGTH=424	1,2
LGS[+80]PIGYVGLNDDSGSILSSMGR	MLOC_43627.4	AT3G07810.1	| RNA-binding (RRM/RBD/RNP motifs) family protein | chr3:2492875-2495052 FORWARD LENGTH=494	1,2
TPT[+80]PGSYLGHR	MLOC_7019.5	AT4G35785.1	| RNA-binding (RRM/RBD/RNP motifs) family protein | chr4:16953211-16955127 REVERSE LENGTH=238	1,2
SSS[+80]PDPVKPPQR	MLOC_58756.5	AT4G30160.1	VLN4, ATVLN4 | villin 4 | chr4:14754528-14759511 FORWARD LENGTH=974	1,2
SKT[+80]PASLQSQETQEEPYAYQDETTK	MLOC_57175.1	AT3G45980.1	H2B, HTB9 | Histone superfamily protein | chr3:16897492-16897944 REVERSE LENGTH=150	1,2
TET[+80]PSYVVPQR	MLOC_57766.1	AT5G42950.1	| GYF domain-containing protein | chr5:17224436-17231044 FORWARD LENGTH=1714	1,2
SPS[+80]PLLVPAR	MLOC_56084.1	AT3G60820.3	PBF1 | N-terminal nucleophile aminohydrolases (Ntn hydrolases) superfamily protein | chr3:22472038-22473809 REVERSE L	1,2
HDS[+80]PSSHSFTPPSIR	MLOC_65838.1	AT5G48150.2	PAT1 | GRAS family transcription factor | chr5:19522497-19524053 REVERSE LENGTH=490	1,2
